# Supplementary material
Source: publisher figshare collection journal article supplement (https://acs.figshare.com/ndownloader/files/3987583)
Supplement: Supplementary file 1 [file 3987583]

 
data_P21c_a
 
_audit_creation_method            SHELXL-2012
_chemical_name_systematic
;
 ?
;
_chemical_name_common             ?
_chemical_melting_point           ?
_chemical_formula_moiety          'C20 H40 N3 P2 Rh1' 
_chemical_formula_sum
 'C20 H40 N3 P2 Rh1' 
_chemical_formula_weight          487.4

loop_
 _atom_type_symbol
 _atom_type_description
 _atom_type_scat_dispersion_real
 _atom_type_scat_dispersion_imag
 _atom_type_scat_source
 'C'  'C'   0.0015   0.0009
 'International Tables Vol C Tables 4.2.6.8 and 6.1.1.4'
 'N'  'N'   0.0030   0.0019
 'International Tables Vol C Tables 4.2.6.8 and 6.1.1.4'
 'P'  'P'   0.0667   0.0580
 'International Tables Vol C Tables 4.2.6.8 and 6.1.1.4'
 'Rh'  'Rh'  -2.5280   0.5964
 'International Tables Vol C Tables 4.2.6.8 and 6.1.1.4'
 'H'  'H'   0.0000   0.0000
 'International Tables Vol C Tables 4.2.6.8 and 6.1.1.4'
 
_space_group_crystal_system       monoclinic
_space_group_IT_number            14
_space_group_name_H-M_alt         'P 21/c'
_space_group_name_Hall            '-P 2ybc'
 
_shelx_space_group_comment
;
The symmetry employed for this shelxl refinement is uniquely defined
by the following loop, which should always be used as a source of
symmetry information in preference to the above space-group names.
They are only intended as comments.
;
 
loop_
 _space_group_symop_operation_xyz
 'x, y, z'
 '-x, y+1/2, -z+1/2'
 '-x, -y, -z'
 'x, -y-1/2, z-1/2'
 
_cell_length_a                    7.867(2)
_cell_length_b                    27.050(6)
_cell_length_c                    11.866(2)
_cell_angle_alpha                 90
_cell_angle_beta                  106.53(2)
_cell_angle_gamma                 90
_cell_volume                      2420.8(9)
_cell_formula_units_Z             4
_cell_measurement_temperature     100(2)
_cell_measurement_reflns_used     4429 
_cell_measurement_theta_min       2.2125 
_cell_measurement_theta_max       20.7865 
 
_exptl_crystal_description        neelde 
_exptl_crystal_colour             yellow 
_exptl_crystal_density_meas       ? 
_exptl_crystal_density_method     ?              
_exptl_crystal_density_diffrn     1.337          
_exptl_crystal_F_000              1024
_exptl_transmission_factor_min    ?                                             
_exptl_transmission_factor_max    ?                                             
_exptl_crystal_size_max           0.1 
_exptl_crystal_size_mid           0.05
_exptl_crystal_size_min           0.01 
_exptl_absorpt_coefficient_mu     0.450
_shelx_estimated_absorpt_T_min    ? 
_shelx_estimated_absorpt_T_max    ? 
_exptl_absorpt_correction_type    multi-scan 
_exptl_absorpt_correction_T_min   0.5950
_exptl_absorpt_correction_T_max   0.7445 
_exptl_absorpt_process_details    'SADABS-2008' 
 
_exptl_special_details
;
 ?
;
 
_diffrn_ambient_temperature       100(2)
_diffrn_radiation_wavelength      0.56085
_diffrn_radiation_type            AgK\a
_diffrn_source                    'fine-focus sealed tube'                        
_diffrn_measurement_device_type   'Smart APEX II Ultra' 
_diffrn_measurement_method        'omega scans' 
_diffrn_detector_area_resol_mean  ? 
_diffrn_reflns_number             22081
_diffrn_reflns_av_unetI/netI      0.0499
_diffrn_reflns_av_R_equivalents   0.0552
_diffrn_reflns_limit_h_min        -9
_diffrn_reflns_limit_h_max        10
_diffrn_reflns_limit_k_min        -34
_diffrn_reflns_limit_k_max        34
_diffrn_reflns_limit_l_min        -15
_diffrn_reflns_limit_l_max        15
_diffrn_reflns_theta_min          1.188
_diffrn_reflns_theta_max          20.943
_diffrn_reflns_theta_full         19.665
_diffrn_measured_fraction_theta_max   0.996
_diffrn_measured_fraction_theta_full  1.000
_diffrn_reflns_Laue_measured_fraction_max    0.996
_diffrn_reflns_Laue_measured_fraction_full   1.000
_diffrn_reflns_point_group_measured_fraction_max   0.996
_diffrn_reflns_point_group_measured_fraction_full  1.000
_reflns_number_total              5218
_reflns_number_gt                 4288
_reflns_threshold_expression      'I > 2\s(I)'
_reflns_Friedel_coverage          0.000
_reflns_Friedel_fraction_max      .
_reflns_Friedel_fraction_full     .
 
_reflns_special_details
;
 Reflections were merged by SHELXL according to the crystal
 class for the calculation of statistics and refinement.
 
 _reflns_Friedel_fraction is defined as the number of unique
 Friedel pairs measured divided by the number that would be
 possible theoretically, ignoring centric projections and
 systematic absences.
;
 
_computing_data_collection        'APEX2 v2011.2'
_computing_cell_refinement        'SAINT V7.68A'
_computing_data_reduction         'SAINT V7.68A' 
_computing_structure_solution     'SHELXS-97 (Sheldrick, 2008)' 
_computing_structure_refinement   'SHELXL-2012 (Sheldrick, 2012)'
_computing_molecular_graphics      'shelXle v0.477'
_computing_publication_material   ?
 
_refine_special_details
;
 ?
;
_refine_ls_structure_factor_coef  Fsqd
_refine_ls_matrix_type            full
_refine_ls_weighting_scheme       calc
_refine_ls_weighting_details
;
 w=1/[\s^2^(Fo^2^)+(0.0454P)^2^+1.6943P]
 where P=(Fo^2^+2Fc^2^)/3
;
_atom_sites_solution_primary      ?
_atom_sites_solution_secondary    ?
_atom_sites_solution_hydrogens    geom
_refine_ls_hydrogen_treatment     constr
_refine_ls_extinction_method      none
_refine_ls_extinction_coef        .
_refine_ls_number_reflns          5218
_refine_ls_number_parameters      247
_refine_ls_number_restraints      9
_refine_ls_R_factor_all           0.0600
_refine_ls_R_factor_gt            0.0455
_refine_ls_wR_factor_ref          0.0967
_refine_ls_wR_factor_gt           0.0920
_refine_ls_goodness_of_fit_ref    1.070
_refine_ls_restrained_S_all       1.069
_refine_ls_shift/su_max           0.001
_refine_ls_shift/su_mean          0.000
 
loop_
 _atom_site_label
 _atom_site_type_symbol
 _atom_site_fract_x
 _atom_site_fract_y
 _atom_site_fract_z
 _atom_site_U_iso_or_equiv
 _atom_site_adp_type
 _atom_site_occupancy
 _atom_site_site_symmetry_order  
 _atom_site_calc_flag
 _atom_site_refinement_flags_posn
 _atom_site_refinement_flags_adp
 _atom_site_refinement_flags_occupancy
 _atom_site_disorder_assembly
 _atom_site_disorder_group
Rh1 Rh 0.68167(4) 0.87187(2) 0.61776(2) 0.01061(9) Uani 1 1 d . U . . .
P1 P 0.84854(11) 0.90643(3) 0.79388(7) 0.01209(18) Uani 1 1 d . . . . .
P2 P 0.48518(11) 0.85950(3) 0.43332(7) 0.01263(18) Uani 1 1 d . . . . .
N1 N 0.5379(4) 0.93439(9) 0.6120(2) 0.0124(6) Uani 1 1 d . . . . .
N2 N 0.8104(4) 0.81155(10) 0.6240(2) 0.0153(6) Uani 1 1 d . U . . .
N3 N 0.8803(4) 0.77657(11) 0.6262(3) 0.0251(7) Uani 1 1 d . U . . .
C1 C 0.5784(4) 0.96700(11) 0.7047(3) 0.0147(7) Uani 1 1 d . . . . .
H1 H 0.5057 0.9953 0.7013 0.018 Uiso 1 1 calc R U . . .
C2 C 0.7183(4) 0.96006(11) 0.8004(3) 0.0146(7) Uani 1 1 d . . . . .
H2 H 0.7454 0.9819 0.8659 0.018 Uiso 1 1 calc R U . . .
C3 C 1.0713(5) 0.92993(12) 0.7881(3) 0.0163(7) Uani 1 1 d . . . . .
C4 C 1.0306(5) 0.96875(14) 0.6879(3) 0.0284(9) Uani 1 1 d . . . . .
H4A H 1.1418 0.9800 0.6747 0.043 Uiso 1 1 calc R U . . .
H4B H 0.9690 0.9970 0.7101 0.043 Uiso 1 1 calc R U . . .
H4C H 0.9551 0.9538 0.6157 0.043 Uiso 1 1 calc R U . . .
C5 C 1.1818(5) 0.95457(14) 0.9015(3) 0.0266(8) Uani 1 1 d . . . . .
H5A H 1.2858 0.9705 0.8874 0.040 Uiso 1 1 calc R U . . .
H5B H 1.2206 0.9295 0.9632 0.040 Uiso 1 1 calc R U . . .
H5C H 1.1098 0.9795 0.9266 0.040 Uiso 1 1 calc R U . . .
C6 C 1.1774(5) 0.88804(14) 0.7522(4) 0.0277(9) Uani 1 1 d . . . . .
H6A H 1.1091 0.8744 0.6763 0.042 Uiso 1 1 calc R U . . .
H6B H 1.2004 0.8619 0.8119 0.042 Uiso 1 1 calc R U . . .
H6C H 1.2903 0.9011 0.7455 0.042 Uiso 1 1 calc R U . . .
C7 C 0.8636(5) 0.87086(12) 0.9322(3) 0.0176(7) Uani 1 1 d . . . . .
C8 C 0.9075(5) 0.90323(13) 1.0443(3) 0.0224(8) Uani 1 1 d . . . . .
H8A H 1.0268 0.9171 1.0585 0.034 Uiso 1 1 calc R U . . .
H8B H 0.9026 0.8829 1.1117 0.034 Uiso 1 1 calc R U . . .
H8C H 0.8209 0.9301 1.0338 0.034 Uiso 1 1 calc R U . . .
C9 C 0.6760(5) 0.84945(14) 0.9148(3) 0.0268(8) Uani 1 1 d . . . . .
H9A H 0.5904 0.8766 0.9047 0.040 Uiso 1 1 calc R U . . .
H9B H 0.6741 0.8299 0.9839 0.040 Uiso 1 1 calc R U . . .
H9C H 0.6445 0.8283 0.8449 0.040 Uiso 1 1 calc R U . . .
C10 C 0.9963(5) 0.82825(13) 0.9484(3) 0.0253(8) Uani 1 1 d . . . . .
H10A H 0.9724 0.8091 0.8754 0.038 Uiso 1 1 calc R U . . .
H10B H 0.9846 0.8068 1.0122 0.038 Uiso 1 1 calc R U . . .
H10C H 1.1171 0.8416 0.9680 0.038 Uiso 1 1 calc R U . . .
C11 C 0.3972(4) 0.94446(11) 0.5150(3) 0.0148(7) Uani 1 1 d . . . . .
H11 H 0.3303 0.9737 0.5144 0.018 Uiso 1 1 calc R U . . .
C12 C 0.3511(5) 0.91407(12) 0.4205(3) 0.0157(7) Uani 1 1 d . . . . .
H12 H 0.2554 0.9211 0.3528 0.019 Uiso 1 1 calc R U . . .
C13 C 0.5898(5) 0.86358(12) 0.3078(3) 0.0180(7) Uani 1 1 d . . . . .
C14 C 0.7394(5) 0.90232(13) 0.3495(3) 0.0212(8) Uani 1 1 d . . . . .
H14A H 0.7935 0.9088 0.2861 0.032 Uiso 1 1 calc R U . . .
H14B H 0.8296 0.8896 0.4184 0.032 Uiso 1 1 calc R U . . .
H14C H 0.6897 0.9330 0.3704 0.032 Uiso 1 1 calc R U . . .
C15 C 0.4612(5) 0.88213(15) 0.1930(3) 0.0278(9) Uani 1 1 d . . . . .
H15A H 0.5237 0.8849 0.1327 0.042 Uiso 1 1 calc R U . . .
H15B H 0.4149 0.9146 0.2061 0.042 Uiso 1 1 calc R U . . .
H15C H 0.3627 0.8587 0.1668 0.042 Uiso 1 1 calc R U . . .
C16 C 0.6731(5) 0.81422(13) 0.2875(3) 0.0249(8) Uani 1 1 d . . . . .
H16A H 0.5791 0.7902 0.2537 0.037 Uiso 1 1 calc R U . . .
H16B H 0.7486 0.8017 0.3626 0.037 Uiso 1 1 calc R U . . .
H16C H 0.7449 0.8193 0.2331 0.037 Uiso 1 1 calc R U . . .
C17 C 0.3268(5) 0.80600(12) 0.4148(3) 0.0179(7) Uani 1 1 d . . . . .
C18 C 0.2237(5) 0.81483(14) 0.5051(3) 0.0272(9) Uani 1 1 d . . . . .
H18A H 0.1546 0.8454 0.4855 0.041 Uiso 1 1 calc R U . . .
H18B H 0.3072 0.8178 0.5837 0.041 Uiso 1 1 calc R U . . .
H18C H 0.1435 0.7870 0.5036 0.041 Uiso 1 1 calc R U . . .
C19 C 0.1949(5) 0.80259(15) 0.2917(3) 0.0311(9) Uani 1 1 d . . . . .
H19A H 0.2582 0.7933 0.2347 0.047 Uiso 1 1 calc R U . . .
H19B H 0.1373 0.8347 0.2700 0.047 Uiso 1 1 calc R U . . .
H19C H 0.1049 0.7776 0.2918 0.047 Uiso 1 1 calc R U . . .
C20 C 0.4279(5) 0.75707(13) 0.4461(3) 0.0257(8) Uani 1 1 d . . . . .
H20A H 0.3433 0.7301 0.4420 0.039 Uiso 1 1 calc R U . . .
H20B H 0.5084 0.7591 0.5259 0.039 Uiso 1 1 calc R U . . .
H20C H 0.4965 0.7508 0.3904 0.039 Uiso 1 1 calc R U . . .
 
loop_
 _atom_site_aniso_label
 _atom_site_aniso_U_11
 _atom_site_aniso_U_22
 _atom_site_aniso_U_33
 _atom_site_aniso_U_23
 _atom_site_aniso_U_13
 _atom_site_aniso_U_12
Rh1 0.01108(15) 0.01338(13) 0.00722(13) -0.00010(10) 0.00239(10) 0.00143(10)
P1 0.0128(5) 0.0156(4) 0.0077(4) -0.0003(3) 0.0026(3) -0.0007(3)
P2 0.0114(5) 0.0171(4) 0.0089(4) -0.0007(3) 0.0020(3) 0.0009(3)
N1 0.0132(15) 0.0139(12) 0.0103(13) -0.0005(10) 0.0036(11) 0.0008(10)
N2 0.0149(15) 0.0225(14) 0.0079(13) -0.0019(11) 0.0022(11) -0.0010(11)
N3 0.0273(19) 0.0262(16) 0.0186(16) -0.0015(12) 0.0015(14) 0.0056(13)
C1 0.0161(18) 0.0127(15) 0.0175(17) -0.0002(12) 0.0083(14) 0.0015(12)
C2 0.0164(18) 0.0155(15) 0.0127(16) -0.0031(12) 0.0055(14) 0.0002(13)
C3 0.0149(18) 0.0211(16) 0.0134(16) -0.0027(13) 0.0047(14) -0.0035(13)
C4 0.025(2) 0.040(2) 0.022(2) 0.0092(16) 0.0090(17) -0.0072(17)
C5 0.023(2) 0.035(2) 0.0204(19) -0.0087(16) 0.0040(16) -0.0129(16)
C6 0.018(2) 0.034(2) 0.036(2) -0.0074(17) 0.0149(18) -0.0046(16)
C7 0.0227(19) 0.0193(16) 0.0098(15) 0.0016(13) 0.0032(14) -0.0019(14)
C8 0.031(2) 0.0270(18) 0.0105(17) -0.0026(13) 0.0091(16) -0.0018(15)
C9 0.030(2) 0.035(2) 0.0168(18) 0.0033(15) 0.0090(16) -0.0120(17)
C10 0.037(2) 0.0249(18) 0.0136(18) 0.0033(14) 0.0067(16) 0.0084(16)
C11 0.0120(18) 0.0167(15) 0.0159(17) 0.0044(12) 0.0045(14) 0.0020(12)
C12 0.0135(18) 0.0201(16) 0.0133(16) 0.0010(13) 0.0031(14) 0.0017(13)
C13 0.0192(19) 0.0250(18) 0.0111(16) 0.0015(13) 0.0064(14) 0.0022(14)
C14 0.022(2) 0.0300(19) 0.0150(17) 0.0026(14) 0.0100(15) -0.0016(15)
C15 0.028(2) 0.043(2) 0.0119(18) 0.0044(15) 0.0039(16) 0.0063(17)
C16 0.026(2) 0.034(2) 0.0178(19) -0.0038(15) 0.0115(16) 0.0040(16)
C17 0.0160(19) 0.0195(16) 0.0177(17) -0.0045(13) 0.0038(15) -0.0021(13)
C18 0.024(2) 0.0291(19) 0.033(2) -0.0025(16) 0.0164(18) -0.0035(16)
C19 0.025(2) 0.038(2) 0.025(2) -0.0093(17) -0.0007(17) -0.0091(17)
C20 0.026(2) 0.0199(17) 0.033(2) -0.0004(15) 0.0107(18) -0.0010(15)
 
_geom_special_details
;
 All esds (except the esd in the dihedral angle between two l.s. planes)
 are estimated using the full covariance matrix.  The cell esds are taken
 into account individually in the estimation of esds in distances, angles
 and torsion angles; correlations between esds in cell parameters are only
 used when they are defined by crystal symmetry.  An approximate (isotropic)
 treatment of cell esds is used for estimating esds involving l.s. planes.
;
 
loop_
 _geom_bond_atom_site_label_1
 _geom_bond_atom_site_label_2
 _geom_bond_distance
 _geom_bond_site_symmetry_2
 _geom_bond_publ_flag
Rh1 N2 1.911(3) . ?
Rh1 N1 2.025(3) . ?
Rh1 P2 2.3165(10) . ?
Rh1 P1 2.3246(10) . ?
P1 C2 1.790(3) . ?
P1 C7 1.876(3) . ?
P1 C3 1.883(4) . ?
P2 C12 1.796(3) . ?
P2 C17 1.881(3) . ?
P2 C13 1.899(3) . ?
N1 C1 1.375(4) . ?
N1 C11 1.378(4) . ?
N2 N3 1.091(4) . ?
C1 C2 1.351(5) . ?
C3 C5 1.531(5) . ?
C3 C6 1.538(5) . ?
C3 C4 1.550(5) . ?
C7 C10 1.530(5) . ?
C7 C9 1.544(5) . ?
C7 C8 1.548(4) . ?
C11 C12 1.354(5) . ?
C13 C15 1.531(5) . ?
C13 C16 1.537(5) . ?
C13 C14 1.548(5) . ?
C17 C20 1.534(5) . ?
C17 C19 1.535(5) . ?
C17 C18 1.535(5) . ?
 
loop_
 _geom_angle_atom_site_label_1
 _geom_angle_atom_site_label_2
 _geom_angle_atom_site_label_3
 _geom_angle
 _geom_angle_site_symmetry_1
 _geom_angle_site_symmetry_3
 _geom_angle_publ_flag
N2 Rh1 N1 177.93(11) . . ?
N2 Rh1 P2 96.73(8) . . ?
N1 Rh1 P2 82.69(8) . . ?
N2 Rh1 P1 98.68(8) . . ?
N1 Rh1 P1 82.04(8) . . ?
P2 Rh1 P1 164.12(3) . . ?
C2 P1 C7 105.79(15) . . ?
C2 P1 C3 106.13(15) . . ?
C7 P1 C3 112.13(16) . . ?
C2 P1 Rh1 100.44(11) . . ?
C7 P1 Rh1 117.32(11) . . ?
C3 P1 Rh1 113.35(11) . . ?
C12 P2 C17 105.60(16) . . ?
C12 P2 C13 105.12(15) . . ?
C17 P2 C13 111.92(15) . . ?
C12 P2 Rh1 100.33(11) . . ?
C17 P2 Rh1 117.61(11) . . ?
C13 P2 Rh1 114.28(12) . . ?
C1 N1 C11 119.3(3) . . ?
C1 N1 Rh1 120.6(2) . . ?
C11 N1 Rh1 120.1(2) . . ?
N3 N2 Rh1 178.3(3) . . ?
C2 C1 N1 122.1(3) . . ?
C1 C2 P1 114.5(2) . . ?
C5 C3 C6 110.3(3) . . ?
C5 C3 C4 108.7(3) . . ?
C6 C3 C4 107.3(3) . . ?
C5 C3 P1 114.6(2) . . ?
C6 C3 P1 110.2(2) . . ?
C4 C3 P1 105.4(2) . . ?
C10 C7 C9 109.0(3) . . ?
C10 C7 C8 109.9(3) . . ?
C9 C7 C8 107.3(3) . . ?
C10 C7 P1 111.6(2) . . ?
C9 C7 P1 104.8(2) . . ?
C8 C7 P1 113.9(2) . . ?
C12 C11 N1 122.3(3) . . ?
C11 C12 P2 114.6(3) . . ?
C15 C13 C16 110.4(3) . . ?
C15 C13 C14 108.2(3) . . ?
C16 C13 C14 108.6(3) . . ?
C15 C13 P2 113.1(2) . . ?
C16 C13 P2 111.8(2) . . ?
C14 C13 P2 104.4(2) . . ?
C20 C17 C19 110.0(3) . . ?
C20 C17 C18 107.8(3) . . ?
C19 C17 C18 108.9(3) . . ?
C20 C17 P2 110.8(2) . . ?
C19 C17 P2 113.8(3) . . ?
C18 C17 P2 105.2(2) . . ?
 
loop_
 _geom_torsion_atom_site_label_1
 _geom_torsion_atom_site_label_2
 _geom_torsion_atom_site_label_3
 _geom_torsion_atom_site_label_4
 _geom_torsion
 _geom_torsion_site_symmetry_1
 _geom_torsion_site_symmetry_2
 _geom_torsion_site_symmetry_3
 _geom_torsion_site_symmetry_4
 _geom_torsion_publ_flag
C11 N1 C1 C2 -177.6(3) . . . . ?
Rh1 N1 C1 C2 2.7(4) . . . . ?
N1 C1 C2 P1 1.9(4) . . . . ?
C7 P1 C2 C1 -127.0(3) . . . . ?
C3 P1 C2 C1 113.7(3) . . . . ?
Rh1 P1 C2 C1 -4.5(3) . . . . ?
C2 P1 C3 C5 68.7(3) . . . . ?
C7 P1 C3 C5 -46.4(3) . . . . ?
Rh1 P1 C3 C5 177.9(2) . . . . ?
C2 P1 C3 C6 -166.2(2) . . . . ?
C7 P1 C3 C6 78.7(3) . . . . ?
Rh1 P1 C3 C6 -56.9(3) . . . . ?
C2 P1 C3 C4 -50.8(3) . . . . ?
C7 P1 C3 C4 -165.9(2) . . . . ?
Rh1 P1 C3 C4 58.5(2) . . . . ?
C2 P1 C7 C10 -170.7(2) . . . . ?
C3 P1 C7 C10 -55.5(3) . . . . ?
Rh1 P1 C7 C10 78.3(3) . . . . ?
C2 P1 C7 C9 71.4(3) . . . . ?
C3 P1 C7 C9 -173.4(2) . . . . ?
Rh1 P1 C7 C9 -39.6(3) . . . . ?
C2 P1 C7 C8 -45.6(3) . . . . ?
C3 P1 C7 C8 69.7(3) . . . . ?
Rh1 P1 C7 C8 -156.6(2) . . . . ?
C1 N1 C11 C12 179.5(3) . . . . ?
Rh1 N1 C11 C12 -0.9(4) . . . . ?
N1 C11 C12 P2 1.0(4) . . . . ?
C17 P2 C12 C11 122.0(3) . . . . ?
C13 P2 C12 C11 -119.5(3) . . . . ?
Rh1 P2 C12 C11 -0.7(3) . . . . ?
C12 P2 C13 C15 -40.9(3) . . . . ?
C17 P2 C13 C15 73.2(3) . . . . ?
Rh1 P2 C13 C15 -149.9(2) . . . . ?
C12 P2 C13 C16 -166.4(2) . . . . ?
C17 P2 C13 C16 -52.2(3) . . . . ?
Rh1 P2 C13 C16 84.6(3) . . . . ?
C12 P2 C13 C14 76.4(2) . . . . ?
C17 P2 C13 C14 -169.4(2) . . . . ?
Rh1 P2 C13 C14 -32.6(2) . . . . ?
C12 P2 C17 C20 -169.7(2) . . . . ?
C13 P2 C17 C20 76.5(3) . . . . ?
Rh1 P2 C17 C20 -58.8(3) . . . . ?
C12 P2 C17 C19 65.8(3) . . . . ?
C13 P2 C17 C19 -48.1(3) . . . . ?
Rh1 P2 C17 C19 176.6(2) . . . . ?
C12 P2 C17 C18 -53.4(3) . . . . ?
C13 P2 C17 C18 -167.3(2) . . . . ?
Rh1 P2 C17 C18 57.4(3) . . . . ?
 
_refine_diff_density_max    1.041
_refine_diff_density_min   -1.091
_refine_diff_density_rms    0.104

_shelxl_version_number 2012-6

_shelx_res_file
;
REM Solution 1  R1  0.087,  Alpha = 0.0640  in P2(1)/c
REM C21 N2 P2 Rh
TITL P21c in P2(1)/c
CELL  0.56086   7.867  27.05  11.866   90.000  106.53   90.000
ZERR    8.00   0.002   0.006   0.002   0.000   0.02   0.000
LATT  1
SYMM -X, 1/2+Y, 1/2-Z
SFAC C N P RH H
UNIT 80 12 8 4 160
TEMP -173.000
L.S. 10
LIST 4
CONF
ACTA
FMAP 2
PLAN 20
RIGU Rh1 N2 N3
WGHT    0.045400    1.694300
FVAR       0.33516
RH1   4    0.681665    0.871873    0.617756    11.00000    0.01108    0.01338 =
         0.00722   -0.00010    0.00239    0.00143
P1    3    0.848540    0.906430    0.793880    11.00000    0.01280    0.01556 =
         0.00772   -0.00034    0.00260   -0.00071
P2    3    0.485176    0.859495    0.433317    11.00000    0.01138    0.01709 =
         0.00887   -0.00068    0.00199    0.00092
N1    2    0.537850    0.934389    0.612028    11.00000    0.01324    0.01388 =
         0.01030   -0.00051    0.00357    0.00076
N2    2    0.810375    0.811554    0.624024    11.00000    0.01490    0.02250 =
         0.00793   -0.00191    0.00216   -0.00096
N3    2    0.880301    0.776573    0.626175    11.00000    0.02731    0.02616 =
         0.01856   -0.00146    0.00147    0.00564
C1    1    0.578408    0.967002    0.704707    11.00000    0.01609    0.01266 =
         0.01748   -0.00024    0.00828    0.00154
AFIX  43
H1    5    0.505740    0.995328    0.701343    11.00000   -1.20000
AFIX   0
C2    1    0.718340    0.960056    0.800442    11.00000    0.01639    0.01554 =
         0.01271   -0.00309    0.00546    0.00024
AFIX  43
H2    5    0.745423    0.981859    0.865908    11.00000   -1.20000
AFIX   0
C3    1    1.071272    0.929928    0.788123    11.00000    0.01495    0.02106 =
         0.01337   -0.00273    0.00472   -0.00350
C4    1    1.030561    0.968752    0.687939    11.00000    0.02493    0.03983 =
         0.02202    0.00923    0.00903   -0.00723
AFIX 137
H4A   5    1.141794    0.979958    0.674714    11.00000   -1.50000
H4B   5    0.969003    0.997020    0.710054    11.00000   -1.50000
H4C   5    0.955142    0.953827    0.615699    11.00000   -1.50000
AFIX   0
C5    1    1.181825    0.954570    0.901515    11.00000    0.02265    0.03531 =
         0.02037   -0.00870    0.00398   -0.01287
AFIX 137
H5A   5    1.285806    0.970461    0.887352    11.00000   -1.50000
H5B   5    1.220632    0.929521    0.963165    11.00000   -1.50000
H5C   5    1.109783    0.979498    0.926592    11.00000   -1.50000
AFIX   0
C6    1    1.177369    0.888041    0.752201    11.00000    0.01769    0.03368 =
         0.03630   -0.00744    0.01495   -0.00463
AFIX 137
H6A   5    1.109074    0.874392    0.676322    11.00000   -1.50000
H6B   5    1.200376    0.861947    0.811937    11.00000   -1.50000
H6C   5    1.290274    0.901089    0.745453    11.00000   -1.50000
AFIX   0
C7    1    0.863647    0.870861    0.932158    11.00000    0.02272    0.01935 =
         0.00977    0.00156    0.00322   -0.00187
C8    1    0.907508    0.903231    1.044335    11.00000    0.03143    0.02704 =
         0.01053   -0.00256    0.00912   -0.00177
AFIX 137
H8A   5    1.026766    0.917148    1.058527    11.00000   -1.50000
H8B   5    0.902592    0.882909    1.111709    11.00000   -1.50000
H8C   5    0.820933    0.930128    1.033786    11.00000   -1.50000
AFIX   0
C9    1    0.676029    0.849447    0.914831    11.00000    0.03001    0.03504 =
         0.01676    0.00326    0.00904   -0.01201
AFIX 137
H9A   5    0.590389    0.876566    0.904704    11.00000   -1.50000
H9B   5    0.674080    0.829864    0.983935    11.00000   -1.50000
H9C   5    0.644528    0.828320    0.844855    11.00000   -1.50000
AFIX   0
C10   1    0.996348    0.828252    0.948404    11.00000    0.03729    0.02487 =
         0.01356    0.00329    0.00671    0.00838
AFIX 137
H10A  5    0.972375    0.809134    0.875402    11.00000   -1.50000
H10B  5    0.984587    0.806753    1.012240    11.00000   -1.50000
H10C  5    1.117077    0.841576    0.967976    11.00000   -1.50000
AFIX   0
C11   1    0.397198    0.944462    0.514983    11.00000    0.01204    0.01670 =
         0.01593    0.00437    0.00450    0.00204
AFIX  43
H11   5    0.330282    0.973746    0.514374    11.00000   -1.20000
AFIX   0
C12   1    0.351071    0.914069    0.420474    11.00000    0.01347    0.02007 =
         0.01328    0.00103    0.00313    0.00174
AFIX  43
H12   5    0.255449    0.921059    0.352817    11.00000   -1.20000
AFIX   0
C13   1    0.589754    0.863579    0.307774    11.00000    0.01916    0.02502 =
         0.01108    0.00147    0.00644    0.00224
C14   1    0.739367    0.902316    0.349495    11.00000    0.02162    0.03001 =
         0.01504    0.00259    0.01005   -0.00156
AFIX 137
H14A  5    0.793547    0.908826    0.286129    11.00000   -1.50000
H14B  5    0.829584    0.889593    0.418395    11.00000   -1.50000
H14C  5    0.689676    0.933049    0.370370    11.00000   -1.50000
AFIX   0
C15   1    0.461216    0.882125    0.192998    11.00000    0.02786    0.04261 =
         0.01195    0.00436    0.00390    0.00627
AFIX 137
H15A  5    0.523721    0.884917    0.132662    11.00000   -1.50000
H15B  5    0.414949    0.914594    0.206127    11.00000   -1.50000
H15C  5    0.362727    0.858733    0.166759    11.00000   -1.50000
AFIX   0
C16   1    0.673138    0.814223    0.287460    11.00000    0.02597    0.03408 =
         0.01780   -0.00377    0.01153    0.00396
AFIX 137
H16A  5    0.579107    0.790224    0.253722    11.00000   -1.50000
H16B  5    0.748551    0.801675    0.362557    11.00000   -1.50000
H16C  5    0.744940    0.819290    0.233146    11.00000   -1.50000
AFIX   0
C17   1    0.326814    0.805999    0.414766    11.00000    0.01599    0.01950 =
         0.01766   -0.00448    0.00381   -0.00205
C18   1    0.223700    0.814834    0.505057    11.00000    0.02427    0.02909 =
         0.03344   -0.00252    0.01644   -0.00352
AFIX 137
H18A  5    0.154562    0.845374    0.485456    11.00000   -1.50000
H18B  5    0.307205    0.817803    0.583723    11.00000   -1.50000
H18C  5    0.143521    0.786963    0.503620    11.00000   -1.50000
AFIX   0
C19   1    0.194893    0.802588    0.291712    11.00000    0.02544    0.03798 =
         0.02492   -0.00934   -0.00073   -0.00906
AFIX 137
H19A  5    0.258191    0.793310    0.234695    11.00000   -1.50000
H19B  5    0.137350    0.834721    0.270023    11.00000   -1.50000
H19C  5    0.104899    0.777554    0.291840    11.00000   -1.50000
AFIX   0
C20   1    0.427891    0.757074    0.446095    11.00000    0.02591    0.01995 =
         0.03273   -0.00041    0.01072   -0.00098
AFIX 137
H20A  5    0.343320    0.730063    0.441984    11.00000   -1.50000
H20B  5    0.508421    0.759126    0.525933    11.00000   -1.50000
H20C  5    0.496498    0.750781    0.390380    11.00000   -1.50000
AFIX   0
HKLF 4

REM  P21c in P2(1)/c
REM R1 =  0.0455 for    4288 Fo > 4sig(Fo)  and  0.0600 for all    5218 data
REM    247 parameters refined using      9 restraints

END

WGHT      0.0454      1.6996

REM Highest difference peak  1.041,  deepest hole -1.091,  1-sigma level  0.104
Q1    1   0.6912  0.9063  0.6180  11.00000  0.05    1.04
Q2    1   0.6835  0.8371  0.6130  11.00000  0.05    0.98
Q3    1   0.7888  0.8558  0.6438  11.00000  0.05    0.91
Q4    1   0.5572  0.8617  0.5836  11.00000  0.05    0.81
Q5    1   0.5990  0.9031  0.6011  11.00000  0.05    0.71
Q6    1   0.4285  0.8915  0.4301  11.00000  0.05    0.68
Q7    1   0.4178  0.8274  0.4209  11.00000  0.05    0.68
Q8    1   0.8302  0.9405  0.8014  11.00000  0.05    0.54
Q9    1   1.0271  0.8703  1.1805  11.00000  0.05    0.53
Q10   1   0.2249  0.8658  0.3465  11.00000  0.05    0.44
Q11   1   0.7729  0.8598  0.9184  11.00000  0.05    0.43
Q12   1   0.9594  0.9183  0.8147  11.00000  0.05    0.43
Q13   1   0.3634  0.8672  0.4041  11.00000  0.05    0.41
Q14   1   0.7513  0.8894  0.7485  11.00000  0.05    0.40
Q15   1   0.5720  0.9525  0.6398  11.00000  0.05    0.40
Q16   1   0.0821  0.8614  0.3351  11.00000  0.05    0.40
Q17   1   0.8766  0.8762  1.1265  11.00000  0.05    0.38
Q18   1   0.9272  0.8511  0.9355  11.00000  0.05    0.37
Q19   1   0.6678  0.8766  0.3373  11.00000  0.05    0.36
Q20   1   0.9429  0.8041  0.6537  11.00000  0.05    0.35
;
_shelx_res_checksum   40543

_shelx_hkl_file
;
   1   0   0 1104.29   30.30
   1   0   0 1199.18   33.20
   1   0   0 1140.29   40.70
  -1   0   0 1121.49   30.20
  -1   0   0 1147.49   40.70
   2   0   0 1070.49   30.20
  -2   0   0 1047.10   30.00
   2   0   0 1072.49   34.00
  -3   0   0  103.99    7.70
   3   0   0  114.59   15.70
   3   0   0  101.19   10.10
   4   0   0   67.19   10.70
  -4   0   0   90.59    8.00
   4   0   0   91.49   16.30
   5   0   0  924.11   36.20
  -5   0   0  883.31   29.80
   5   0   0  887.31   47.10
   6   0   0 1567.74   72.09
   6   0   0 1553.04   55.99
   7   0   0   58.99   12.90
   7   0   0   78.79   20.10
   8   0   0  358.96   40.50
   9   0   0   53.09   24.30
   1  -1   0 2055.99   69.69
  -1  -1   0 2128.59   52.89
   1  -1   0 2012.90   53.49
   1  -1   0 2095.59   57.19
  -1   1   0 2019.50   53.49
   1   1   0 2081.79   52.89
   1   1   0 2023.50   69.59
  -1   1   0 2003.30   69.49
   1   1   0 2068.59   56.89
   2  -1   0  141.39   10.60
  -2  -1   0  142.99    7.60
  -2   1   0  171.68   15.50
   2   1   0  137.99    7.30
  -2   1   0  123.59    7.80
   2   1   0  162.38   15.60
   2   1   0  148.99   10.20
  -3  -1   0   19.40    4.20
   3  -1   0   24.70    6.50
   3   1   0   29.00   11.10
   3   1   0   27.60    6.20
  -3   1   0   26.20    4.70
   4  -1   0 1090.59   49.40
   4  -1   0  994.40   37.80
  -4  -1   0 1002.40   31.70
   4   1   0 1097.79   37.90
   4   1   0 1021.90   48.50
  -4   1   0 1038.80   32.50
  -5  -1   0  562.54   21.30
   5  -1   0  617.64   37.10
   5  -1   0  535.75   26.60
   5   1   0  561.34   27.10
   5   1   0  602.44   36.50
  -5   1   0  573.04   21.80
   6  -1   0  279.47   23.20
   6  -1   0  321.07   29.10
   6   1   0  270.57   22.30
  -6   1   0  280.07   15.60
   7  -1   0  121.09   24.20
   7  -1   0  127.19   16.60
   7   1   0  111.59   15.80
   7   1   0  134.09   24.80
   8  -1   0   36.00   19.70
   8   1   0  119.59   25.80
   9  -1   0   91.19   26.60
   9   1   0  108.69   28.20
   0  -2   0    8.20    1.50
   0   2   0    4.00    1.20
  -1  -2   0   27.90    2.70
   1  -2   0   31.20    3.50
   1  -2   0   22.40    3.70
   1  -2   0   20.90    5.90
  -1  -2   0   19.40    3.40
   1   2   0   35.70    2.70
   1   2   0   30.50    3.70
  -1   2   0   30.70    6.80
   1   2   0   26.70    5.60
  -1   2   0   22.90    3.30
  -1   2   0   24.70    4.20
   2  -2   0  110.39    9.20
  -2  -2   0  112.69    6.50
   2   2   0  102.79    8.30
  -2   2   0  102.29    7.50
  -2   2   0  134.99   14.50
   2   2   0  104.59    6.50
   2   2   0  117.29   13.10
   3  -2   0    4.90    4.90
  -3  -2   0    0.00    3.00
   3   2   0    0.90    8.50
   3   2   0    0.00    4.10
  -3   2   0    0.00    3.40
   4  -2   0    0.00    5.50
   4  -2   0   37.80   12.60
  -4  -2   0    0.00    3.60
   4   2   0    0.00    5.40
  -4   2   0    4.60    4.10
   4   2   0    2.10    9.70
   5  -2   0   22.40   13.90
   5  -2   0    0.00    7.30
  -5  -2   0    3.80    4.70
   5   2   0   16.80   12.20
  -5   2   0   10.50    5.20
   5   2   0    0.00    6.10
   6  -2   0  135.29   22.30
   6  -2   0    0.00   10.50
  -6   2   0   42.50    7.10
   6   2   0   72.09   17.80
   6   2   0   34.10   10.70
   7  -2   0   68.19   18.70
   7  -2   0   39.70   11.80
   7   2   0   54.79   19.10
   7   2   0   34.80   10.90
   8  -2   0    7.00   16.80
   8   2   0    0.00   13.60
   9  -2   0   69.49   22.30
   9   2   0   76.69   24.90
   0  -3   0    1.50    1.30
   0  -3   0    0.90    1.70
   0  -3   0    6.00    1.80
   0   3   0    0.00    1.50
   0   3   0    1.60    2.10
   0   3   0    0.00    1.40
  -1  -3   0 2344.17   60.09
  -1   3   0 2243.88   64.79
  -1   3   0 2343.37   78.39
   1   3   0 2364.36   64.39
  -1   3   0 2242.28   61.39
   1   3   0 2385.36   60.19
   1   3   0 2337.37   78.29
  -2  -3   0  457.85   14.50
   2   3   0  445.56   17.70
  -2   3   0  416.86   15.90
   2   3   0  433.96   23.20
   2   3   0  477.15   14.50
  -2   3   0  435.56   19.00
  -2   3   0  437.06   24.00
   3  -3   0  127.79   11.30
  -3  -3   0  110.19    7.50
   3   3   0  126.49   15.80
  -3   3   0  112.29    8.70
   3   3   0  121.69   10.50
  -3   3   0  125.99   16.20
  -4  -3   0  247.18   11.70
   4  -3   0  246.48   16.00
   4   3   0  231.58   15.20
  -4   3   0  235.58   12.80
   4   3   0  211.38   22.80
  -5  -3   0  178.88   11.30
   5  -3   0  155.18   16.90
  -5   3   0  205.48   13.00
   5   3   0  192.08   23.20
   5   3   0  175.98   16.00
   6  -3   0  413.56   26.20
  -6   3   0  521.65   21.70
   6   3   0  477.05   34.80
   6   3   0  450.75   25.40
   7  -3   0  130.09   17.30
   7  -3   0  147.69   25.80
   7   3   0  174.68   18.40
   7   3   0  170.38   27.70
   8  -3   0   37.80   20.50
   8   3   0   23.90   18.70
   9  -3   0   64.59   24.30
   9   3   0   47.20   23.00
   0  -4   0 9999.00  247.78
   0  -4   0 9679.33  312.97
   0   4   0 9691.73  260.37
   0   4   0 9799.22  313.17
  -1  -4   0  893.81   24.40
   1   4   0  883.31   26.50
  -1   4   0  866.21   32.70
   1   4   0  845.92   32.10
  -1   4   0  845.22   27.00
  -1   4   0  872.41   25.90
   1   4   0  863.71   24.40
  -2  -4   0  744.33   22.20
   2   4   0  775.02   22.20
  -2   4   0  736.43   27.10
   2   4   0  753.32   25.80
   2   4   0  762.62   32.80
  -2   4   0  748.63   33.50
  -2   4   0  735.43   24.40
   3  -4   0  293.87   16.50
  -3  -4   0  304.47   12.00
   3   4   0  329.87   22.00
  -3   4   0  269.57   13.60
   3   4   0  291.57   15.10
  -3   4   0  298.07   22.00
   4  -4   0   34.30    8.30
  -4  -4   0   42.40    5.60
   4   4   0   30.10    7.70
  -4   4   0   49.20    7.10
   4   4   0   45.30   12.50
   5  -4   0 1228.88   46.70
   5  -4   0 1256.17   59.89
  -5  -4   0 1338.57   38.90
  -5   4   0 1284.67   40.90
   5   4   0 1214.78   58.89
   5   4   0 1294.87   45.60
   6  -4   0 1328.47   51.89
   6  -4   0 1287.87   65.69
  -6   4   0 1398.66   44.80
   6   4   0 1396.06   66.29
   6   4   0 1454.35   51.09
   7  -4   0    4.00    9.00
   7  -4   0   52.49   17.00
   7   4   0   10.10    9.00
   7   4   0   44.20   18.30
   8  -4   0  155.38   28.30
   8   4   0  154.48   29.20
   9  -4   0   94.49   26.10
   9   4   0   74.69   25.10
   0  -5   0    0.00    2.70
   0  -5   0    9.50    3.00
   0   5   0    0.00    2.40
   0   5   0    3.90    3.60
  -1  -5   0 2046.10   53.99
   1   5   0 2033.00   57.59
  -1   5   0 2120.29   69.69
  -1   5   0 1927.11   55.29
   1   5   0 2031.30   69.19
  -1   5   0 2030.30   58.09
  -2  -5   0 1149.69   31.80
  -2   5   0 1113.79   33.90
  -2   5   0 1106.49   36.90
   2   5   0 1137.29   35.40
   2   5   0 1088.09   44.10
  -2   5   0 1114.59   44.60
  -3  -5   0    8.40    3.40
   3   5   0    4.00    5.00
   3   5   0    6.90    8.70
  -3   5   0    0.00    9.70
  -3   5   0    3.00    6.30
  -3   5   0    0.00    3.90
  -4  -5   0 1350.66   38.90
   4  -5   0 1366.56   46.80
  -4   5   0 1268.87   41.30
   4   5   0 1319.57   57.59
   4   5   0 1341.97   44.80
  -4   5   0 1294.77   57.29
   5  -5   0  473.45   32.80
  -5  -5   0  455.25   18.60
   5  -5   0  503.15   25.30
   5   5   0  416.16   23.10
  -5   5   0  440.16   20.40
   5   5   0  518.95   33.60
   6  -5   0    0.00    7.40
   6  -5   0   48.00   16.90
  -6   5   0   17.20    6.70
   6   5   0   35.60   10.40
   7  -5   0  195.38   20.40
   7  -5   0  198.88   29.50
   7   5   0  202.18   19.50
   7   5   0  178.48   28.70
   8  -5   0    0.00   14.40
   8   5   0   43.00   19.30
   9  -5   0  299.27   39.40
   9   5   0  321.97   41.30
   0  -6   0   27.80    4.60
   0  -6   0   33.80    4.60
   0   6   0   29.90    4.30
   0   6   0   40.90    5.80
  -1  -6   0   83.69    6.30
   1   6   0   80.89    7.00
   1   6   0   77.49    8.30
  -1   6   0   87.09    7.60
  -1   6   0   80.29   10.00
  -1   6   0   78.59    7.20
  -2  -6   0   24.60    4.00
   2   6   0   25.90    5.40
  -2   6   0   26.20    5.40
  -2   6   0   24.40   10.20
   2   6   0   27.50    8.50
  -2   6   0   22.20    6.00
  -3  -6   0  444.26   15.50
  -3   6   0  407.46   17.90
  -3   6   0  444.36   27.00
   3   6   0  402.36   18.70
  -3   6   0  427.36   21.20
   3   6   0  421.16   25.30
  -4  -6   0  305.77   13.50
   4  -6   0  292.87   18.40
  -4   6   0  305.27   16.00
   4   6   0  326.37   25.00
   4   6   0  318.07   17.60
  -4   6   0  345.47   26.30
   5  -6   0    0.00    7.20
  -5  -6   0    0.00    4.00
  -5   6   0   12.20    5.70
   5   6   0   35.00   14.10
   5   6   0    0.00    6.40
   6  -6   0  121.29   22.80
   6  -6   0   91.19   14.00
   6   6   0   91.09   13.20
  -6   6   0   99.59   11.50
   6   6   0   87.89   20.80
   7  -6   0   84.89   14.20
   7  -6   0   59.89   19.50
   7   6   0   63.49   20.20
   7   6   0   65.89   12.70
   8  -6   0    0.00   16.90
   8   6   0    1.30   16.30
   9  -6   0   39.90   22.30
   9   6   0  107.59   27.70
   0  -7   0    0.00    3.90
   0  -7   0    0.00    3.30
   0   7   0    0.00    3.10
   0   7   0    0.00    5.20
  -1  -7   0 1387.96   39.20
   1   7   0 1407.56   49.20
  -1   7   0 1374.56   42.30
  -1   7   0 1416.36   49.99
   1   7   0 1350.06   41.40
  -2  -7   0  270.17   11.30
   2   7   0  257.47   17.40
  -2   7   0  265.97   15.10
  -2   7   0  261.37   13.40
  -2   7   0  277.77   18.90
   2   7   0  259.17   13.10
  -3  -7   0   29.10    4.70
   3   7   0   39.90   10.50
  -3   7   0   34.20   11.90
   3   7   0   31.70    6.60
  -3   7   0   34.70    6.60
  -3   7   0   21.90    7.50
  -4  -7   0  442.96   16.40
   4   7   0  425.46   28.70
  -4   7   0  397.16   28.10
   4   7   0  420.96   20.80
  -4   7   0  381.36   18.80
   5  -7   0  400.96   23.60
  -5  -7   0  404.06   16.80
  -5   7   0  415.06   20.00
   5   7   0  382.66   21.20
   5   7   0  345.77   29.40
   6  -7   0   94.49   20.10
   6  -7   0   70.29   13.00
  -6   7   0   91.89   11.20
   6   7   0   64.19   12.00
   6   7   0   73.09   18.10
   7  -7   0  116.69   16.90
   7  -7   0  114.09   23.90
   7   7   0   84.29   14.00
   7   7   0   76.79   21.30
   8  -7   0   20.80   17.60
   8   7   0   17.70   18.90
   9  -7   0    0.00   17.30
   9   7   0    8.50   18.20
   0  -8   0  768.72   27.60
   0  -8   0  777.02   24.80
   0   8   0  755.52   28.70
   0   8   0  727.93   24.80
   1  -8   0 1174.48   36.50
  -1  -8   0 1208.78   35.10
  -1   8   0 1165.18   37.60
  -1   8   0 1213.98   44.20
   1   8   0 1195.38   36.90
   1   8   0 1193.48   43.10
  -2  -8   0    6.90    3.40
  -2   8   0   10.00    4.80
  -2   8   0    0.40    4.80
   2   8   0    0.50    3.90
   2   8   0    7.90    6.90
  -2   8   0    5.70    8.80
  -3  -8   0  291.57   12.30
  -3   8   0  298.17   22.40
   3   8   0  265.27   20.30
   3   8   0  262.17   14.60
  -3   8   0  279.57   17.70
  -3   8   0  239.78   14.60
  -4  -8   0   41.00    5.80
  -4   8   0   33.30   10.20
   4   8   0   40.20   11.70
   4   8   0   37.30    8.10
  -4   8   0   58.69   14.40
  -5  -8   0 1277.77   37.90
   5  -8   0 1162.08   46.60
   5   8   0 1192.78   57.69
   5   8   0 1278.87   44.90
  -5   8   0 1213.68   41.60
   6  -8   0  447.46   35.10
   6  -8   0  479.15   27.60
   6   8   0  536.25   26.30
  -6   8   0  467.25   23.10
   6   8   0  425.76   34.60
   7  -8   0   55.29   18.70
   7  -8   0   57.09   14.00
   7   8   0   40.30   11.10
   7   8   0   58.99   19.40
   8  -8   0  114.99   25.30
   8   8   0   84.29   25.00
   9  -8   0  146.59   29.20
   9   8   0   68.49   24.20
   0  -9   0    0.00    3.50
   0   9   0    0.10    3.70
   0   9   0    4.20    5.80
  -1  -9   0  962.20   29.80
   1  -9   0  929.61   31.10
   1   9   0  950.60   35.70
  -1   9   0  961.10   37.30
   1   9   0  951.60   31.00
  -1   9   0  976.70   32.20
  -2  -9   0 1992.40   55.39
  -2   9   0 1996.10   72.29
   2   9   0 1987.50   71.79
  -2   9   0 1995.90   61.39
   2   9   0 1938.31   59.39
  -2   9   0 2040.80   58.49
  -3  -9   0  195.88   10.50
   3   9   0  227.88   13.50
  -3   9   0  205.18   13.40
   3   9   0  212.88   18.40
  -3   9   0  214.28   20.10
  -3   9   0  189.98   15.40
  -4  -9   0 1560.04   45.70
   4   9   0 1594.24   51.89
  -4   9   0 1542.15   65.49
  -4   9   0 1532.15   49.60
   4   9   0 1537.55   65.39
  -4   9   0 1677.13   56.39
  -5  -9   0  218.18   12.50
   5  -9   0  182.68   18.30
  -5   9   0  189.48   15.90
   5   9   0  248.58   17.30
   5   9   0  274.17   24.80
  -5   9   0  212.88   26.00
   6  -9   0   20.00    9.30
   6  -9   0   13.40   15.40
   6   9   0   37.30   14.50
   6   9   0   11.20    8.50
  -6   9   0    0.00    6.00
   7  -9   0   47.50   19.80
   7  -9   0   65.89   14.30
   7   9   0   82.59   13.80
   7   9   0   36.70   18.30
   8  -9   0   59.79   21.50
   8   9   0   64.19   19.30
   9  -9   0  366.46   45.10
   9   9   0  390.06   46.00
   0 -10   0    8.80    4.40
   0  10   0    4.20    4.10
   0  10   0    7.80    6.30
  -1 -10   0 1229.48   37.50
   1 -10   0 1233.48   38.90
  -1  10   0 1303.77   40.40
   1  10   0 1262.77   45.20
  -1  10   0 1116.59   45.80
   1  10   0 1308.77   39.50
  -2 -10   0  706.53   23.90
  -2  10   0  709.73   26.80
  -2  10   0  750.72   32.80
   2  10   0  688.93   31.10
  -2  10   0  730.03   28.00
   2  10   0  675.73   25.50
  -3 -10   0  104.59    8.60
   3  10   0  125.29   15.30
  -3  10   0  127.29   13.40
   3  10   0  122.19   11.10
  -3  10   0  128.79   17.30
  -3  10   0  125.09   11.70
  -4 -10   0  106.29    8.80
  -4  10   0  115.89   18.80
   4  10   0   95.59   11.30
  -4  10   0   93.09   10.80
   4  10   0  116.19   17.00
  -4  10   0  110.09   14.30
  -5 -10   0   70.59    8.00
   5  10   0   78.29   17.90
  -5  10   0   78.69   19.10
   5  10   0   81.89   11.50
  -5  10   0   73.09   10.50
   6 -10   0    0.00    8.50
  -6  10   0    6.80    6.80
   6  10   0    0.00    7.10
   6  10   0    3.20   12.70
   7 -10   0    0.00   14.40
   7 -10   0    0.00    9.80
   7  10   0   17.50   16.30
   7  10   0   11.60    8.90
   8 -10   0   10.60   16.60
   8  10   0   32.70   17.90
   9 -10   0   13.60   19.00
   9  10   0  101.29   25.60
   0 -11   0    1.20    4.00
   0  11   0    0.00    6.20
   0  11   0    7.60    4.20
   1 -11   0  568.14   22.70
  -1 -11   0  572.14   21.30
  -1  11   0  579.64   23.00
   1  11   0  582.44   24.60
  -1  11   0  557.94   26.20
  -2 -11   0  132.89    9.40
  -2  11   0  126.19   12.00
   2  11   0  144.99   13.90
   2  11   0  137.69   10.80
  -2  11   0  157.48   15.80
  -3 -11   0   27.40    5.20
  -3  11   0   10.10   11.20
   3  11   0   27.80    9.90
  -3  11   0   36.60    8.00
   3  11   0   17.40    6.10
  -3  11   0   16.80    6.80
  -4 -11   0  246.58   12.70
   4  11   0  258.27   22.40
   4  11   0  244.48   15.90
  -4  11   0  248.88   21.00
  -4  11   0  242.58   16.50
  -4  11   0  253.67   25.90
   5  11   0   36.70   14.40
   5  11   0   54.59    9.80
  -5  11   0   54.99   17.20
  -5  11   0   46.50    9.40
   6 -11   0   50.59   12.50
  -6  11   0   70.09   11.00
   6  11   0   64.69   12.10
   6  11   0   57.29   17.80
   7 -11   0    1.30    9.90
   7 -11   0    7.20   15.80
   7  11   0    0.00   14.30
  -7  11   0    0.80    7.80
   7  11   0   14.00    9.00
   8 -11   0   16.30   18.10
   8  11   0    2.80   16.70
   9 -11   0   30.20   22.60
   9  11   0   72.59   26.10
   0 -12   0 2013.00   59.69
   0  12   0 2017.80   61.69
   0  12   0 2129.19   71.49
   1 -12   0  591.94   24.30
  -1 -12   0  611.44   23.10
   1  12   0  657.73   24.20
  -1  12   0  612.84   28.50
  -1  12   0  670.83   25.30
   1  12   0  631.14   26.60
   2 -12   0  455.45   21.10
  -2 -12   0  487.25   18.90
   2  12   0  449.16   20.00
   2  12   0  450.25   23.50
  -2  12   0  471.65   22.00
  -2  12   0  459.85   25.10
  -3 -12   0  565.34   21.30
  -3  12   0  568.74   25.00
  -3  12   0  608.74   32.60
  -3  12   0  620.14   27.50
   3  12   0  552.64   29.90
   3  12   0  566.14   24.30
  -4 -12   0    7.10    4.50
   4  12   0   18.10   10.60
  -4  12   0   17.30   12.80
  -4  12   0    7.50    6.20
   4  12   0    7.40    5.80
  -4  12   0   11.20    7.20
  -5  12   0  500.45   34.60
   5  12   0  494.75   24.50
  -5  12   0  481.15   24.40
   5  12   0  453.15   32.10
  -5  12   0  523.65   30.30
   6 -12   0  323.07   23.70
  -6  12   0  288.47   19.50
   6  12   0  314.57   29.20
   6  12   0  355.06   21.80
   7 -12   0    5.70    9.70
   7 -12   0    3.90   15.30
   7  12   0   11.90    9.10
   7  12   0   12.70   15.90
  -7  12   0    0.00    7.70
   8 -12   0  349.96   41.40
   8  12   0  343.97   40.60
   9 -12   0   66.39   25.00
   9  12   0  111.49   27.90
   0 -13   0    8.90    5.00
   0  13   0    2.10    7.30
   0  13   0   10.10    4.70
  -1 -13   0  346.47   15.80
   1 -13   0  317.57   16.70
   1  13   0  290.07   15.20
  -1  13   0  289.17   19.80
   1  13   0  332.57   17.60
  -1  13   0  304.07   16.60
  -2 -13   0 1200.08   37.90
   2 -13   0 1229.38   41.00
  -2  13   0 1203.28   47.90
   2  13   0 1207.18   47.20
  -2  13   0 1163.28   41.60
   2  13   0 1177.28   40.10
  -3 -13   0   34.50    6.20
   3  13   0   38.00    7.40
  -3  13   0   31.70    8.50
   3  13   0   22.30    9.10
  -3  13   0   39.90   13.20
  -4 -13   0  843.32   29.40
  -4  13   0  877.81   34.40
  -4  13   0  869.81   44.10
  -4  13   0  889.91   38.10
   4  13   0  826.72   42.50
   4  13   0  875.81   33.90
  -5  13   0  110.99   21.10
   5  13   0   88.69   12.60
  -5  13   0  132.39   17.50
   5  13   0   99.19   18.90
  -5  13   0   90.49   12.50
   6  13   0   68.19   11.90
   6  13   0   90.09   20.20
  -6  13   0   50.69   10.90
   7 -13   0  178.68   21.50
   7 -13   0  186.78   29.60
   7  13   0  198.58   29.40
  -7  13   0  192.78   18.90
   7  13   0  221.18   20.60
   8 -13   0   43.30   22.30
   8  13   0   83.89   24.40
   0 -14   0   18.90    6.10
   0  14   0   22.80    6.00
   0  14   0   17.50    7.90
   1 -14   0  370.86   18.70
  -1 -14   0  395.46   17.90
  -1  14   0  397.56   19.20
   1  14   0  372.66   19.70
  -1  14   0  339.87   21.90
   1  14   0  384.76   17.80
  -2 -14   0  168.98   11.40
   2 -14   0  136.99   13.10
  -2  14   0  159.28   14.40
  -2  14   0  194.38   17.50
   2  14   0  166.78   14.60
   2  14   0  168.88   11.80
  -3 -14   0    8.60    5.00
   3 -14   0    3.70    5.80
  -3  14   0    6.00   10.50
   3  14   0    4.10    8.30
   3  14   0    8.30    5.50
  -3  14   0    8.10    7.20
  -4 -14   0    0.00    4.30
   4  14   0   10.70   10.60
  -4  14   0    0.00    7.30
   4  14   0    0.00    5.70
  -4  14   0   12.80   12.90
  -5  14   0  359.06   30.40
   5  14   0  350.86   28.50
  -5  14   0  390.36   26.60
   5  14   0  360.86   21.20
  -5  14   0  340.07   21.40
   6  14   0   65.29   18.90
  -6  14   0   58.29   15.40
  -6  14   0   41.60   11.10
   6  14   0   60.19   11.70
   7 -14   0  151.08   20.20
   7 -14   0  161.08   27.70
   7  14   0  180.68   28.30
   7  14   0  149.29   17.90
   8 -14   0   13.80   19.10
   8  14   0   11.90   18.90
   0 -15   0   20.10    6.20
   0  15   0    9.60    8.00
   0  15   0   31.40    6.70
  -1 -15   0   42.40    7.50
   1 -15   0   33.00    7.50
  -1  15   0   30.60    7.20
   1  15   0   41.30    7.60
   1  15   0   47.30    8.60
  -1  15   0   40.00   10.90
   2 -15   0  274.67   17.20
  -2 -15   0  267.87   14.90
   2  15   0  283.17   18.60
   2  15   0  294.57   16.40
  -2  15   0  279.27   17.20
  -2  15   0  289.77   20.80
  -3 -15   0   61.29    8.30
   3 -15   0   62.09   10.60
  -3  15   0   55.19   10.50
   3  15   0   72.19   12.50
  -3  15   0   41.40   13.70
   3  15   0   57.59    9.00
  -4 -15   0  488.75   20.90
   4  15   0  501.75   23.90
  -4  15   0  489.95   32.70
   4  15   0  486.05   30.50
  -4  15   0  495.75   27.60
  -5  15   0   31.60   16.10
   5  15   0    9.10   12.10
   5  15   0    7.10    7.20
  -5  15   0   23.10   10.90
  -6  15   0   52.69   14.70
   6  15   0   32.40    9.60
   6  15   0   54.49   18.50
   7 -15   0  114.09   25.00
   7 -15   0  138.59   20.30
   7  15   0  155.58   18.00
   7  15   0  129.79   26.30
   8 -15   0   81.49   23.50
   8  15   0   37.30   20.90
   0 -16   0 1041.80   36.10
   0  16   0 1042.70   36.80
   0  16   0  945.11   40.40
  -1 -16   0  754.82   28.70
   1 -16   0  748.83   29.80
   1  16   0  811.62   30.00
   1  16   0  738.93   32.10
  -1  16   0  735.63   33.60
  -1  16   0  731.83   29.90
  -2 -16   0  251.87   14.70
   2 -16   0  192.68   16.60
  -2  16   0  228.68   16.00
   2  16   0  228.28   15.00
   2  16   0  242.68   17.20
  -2  16   0  222.78   19.70
  -3 -16   0  717.43   26.60
   3 -16   0  680.93   29.80
  -3  16   0  646.54   31.00
  -3  16   0  699.33   35.70
   3  16   0  614.14   27.50
   3  16   0  645.54   33.30
  -4 -16   0   26.10    6.80
   4 -16   0   44.20   10.30
  -4  16   0   37.10   10.80
  -4  16   0   22.10   14.50
   4  16   0   27.30    8.10
   4  16   0   34.80   12.50
  -5  16   0  213.68   22.80
   5  16   0  230.98   26.30
  -5  16   0  227.38   27.90
   5  16   0  227.98   17.50
   6  16   0  241.58   18.90
  -6  16   0  222.58   25.50
   6  16   0  207.88   27.90
   7 -16   0   40.20   11.90
   7 -16   0   63.59   15.50
   7 -16   0   40.50   20.30
   7  16   0   29.60   11.40
   7  16   0   36.90   18.70
   8 -16   0  405.56   38.60
   8  16   0  455.05   40.80
   0 -17   0   34.50    7.60
   0  17   0    2.10    8.40
   0  17   0   16.20    6.10
  -1 -17   0  281.37   16.50
   1 -17   0  267.67   16.90
  -1  17   0  226.48   20.10
   1  17   0  274.27   18.90
  -1  17   0  258.37   16.90
   1  17   0  292.17   16.30
  -2 -17   0  545.25   23.60
   2 -17   0  543.35   25.70
  -2  17   0  547.45   26.20
   2  17   0  547.35   27.60
  -2  17   0  545.85   29.00
   2  17   0  523.45   24.30
  -3 -17   0   85.29   10.10
   3 -17   0   61.89   10.90
  -3  17   0   77.49   16.20
  -3  17   0   73.59   12.60
   3  17   0   69.99   10.60
   3  17   0   76.49   13.40
   4 -17   0  363.66   22.00
  -4 -17   0  355.26   18.00
  -4  17   0  331.77   23.70
   4  17   0  329.47   20.00
   4  17   0  326.57   25.30
  -4  17   0  316.37   28.10
   5 -17   0  236.88   21.00
   5  17   0  212.18   17.10
  -5  17   0  226.48   28.20
  -5  17   0  232.08   24.20
   5  17   0  237.08   26.90
   6 -17   0    7.20    8.20
  -6  17   0    5.90   11.70
   6  17   0    4.30   13.90
   6  17   0   15.80    9.10
   7 -17   0  397.16   41.50
   7 -17   0  322.47   23.90
   7  17   0  355.56   38.40
   7  17   0  352.76   24.40
   8 -17   0    0.00   18.50
   8  17   0   49.10   20.30
   0 -18   0 1132.99   38.90
   0  18   0  980.10   43.00
   0  18   0 1045.10   38.70
  -1 -18   0  267.57   16.50
   1 -18   0  282.47   17.90
  -1  18   0  267.07   17.60
   1  18   0  251.07   18.90
  -1  18   0  224.08   20.80
   1  18   0  272.77   16.30
   2 -18   0   26.90    8.10
  -2 -18   0   24.60    7.30
  -2  18   0   21.60    8.30
   2  18   0   28.20    9.50
   2  18   0   25.00    7.80
  -2  18   0   18.30   11.40
   3 -18   0   11.60    7.70
  -3 -18   0   16.40    6.50
  -3  18   0   19.60   12.80
   3  18   0    9.70    9.30
   3  18   0   21.30    7.10
  -3  18   0   15.90    9.00
  -4 -18   0    7.80    5.80
   4 -18   0    0.90    7.60
   4  18   0    2.80   10.20
  -4  18   0   11.70    9.60
  -4  18   0    0.00   12.90
   4  18   0    4.70    6.80
   5 -18   0  108.79   15.30
  -5  18   0  134.29   23.90
   5  18   0  112.49   19.80
  -5  18   0   89.59   16.80
   5  18   0  113.29   15.00
   6 -18   0  216.58   21.20
   6  18   0  249.38   21.60
   6  18   0  220.18   28.50
  -6  18   0  212.48   25.20
   7 -18   0   15.20   10.70
   7  18   0   19.70   17.00
   7  18   0   13.90   11.00
   8  18   0   33.50   21.20
   0 -19   0   20.80    7.40
   0  19   0   16.00    6.80
   0  19   0   13.30   10.40
  -1 -19   0    4.20    6.00
   1 -19   0    5.60    6.50
   1  19   0   15.90    9.10
  -1  19   0   17.00   10.90
   1  19   0    0.10    5.30
  -1  19   0   17.20    7.10
   2 -19   0  289.07   19.00
  -2 -19   0  294.27   17.40
   2  19   0  277.47   17.10
  -2  19   0  263.27   22.20
  -2  19   0  252.37   18.30
   2  19   0  244.68   19.10
   3 -19   0    7.60    7.70
  -3 -19   0   17.20    6.90
  -3  19   0    0.00   13.00
   3  19   0    5.70   10.10
  -3  19   0   24.40    9.10
   3  19   0   16.40    7.40
  -4 -19   0  118.19   12.60
   4 -19   0  130.99   15.90
   4  19   0   97.49   17.40
   4  19   0  126.99   14.60
  -4  19   0   65.49   14.10
   5 -19   0    0.00    6.90
  -5  19   0    7.50    9.30
   5  19   0    0.00    7.00
   5  19   0    0.00   11.40
   6 -19   0   23.40   10.20
   6  19   0   39.20   16.90
   6  19   0   18.90    9.30
  -6  19   0   20.60   13.60
   7 -19   0  158.18   19.60
   7  19   0  174.88   19.60
   7  19   0  156.78   27.60
  -7  19   0  124.59   23.30
   8  19   0  171.78   30.70
   0 -20   0  318.77   19.30
   0  20   0  296.17   22.90
   0  20   0  345.17   19.70
  -1 -20   0   37.10    8.50
   1 -20   0   49.10    9.90
   1  20   0   29.80   10.60
   1  20   0   37.60    8.60
  -1  20   0   31.10    8.90
   2 -20   0   81.89   12.20
  -2 -20   0   76.79   11.40
   2  20   0   86.29   13.50
  -2  20   0   78.29   12.70
   2  20   0   64.59   10.90
   3 -20   0  844.52   37.30
  -3 -20   0  946.61   34.90
   3  20   0  875.21   41.80
  -3  20   0  858.51   38.90
   3  20   0  937.31   36.90
  -4 -20   0    2.90    6.40
   4 -20   0    7.00    8.00
  -4  20   0    4.80    8.90
   4  20   0    7.10    7.20
   4  20   0   16.20   11.20
   5 -20   0  287.37   21.70
   5  20   0  260.97   25.60
   5  20   0  259.97   19.60
  -5  20   0  272.77   26.50
   6 -20   0  101.69   15.90
   6  20   0   99.39   22.30
   6  20   0  167.88   18.60
  -6  20   0  107.89   20.10
   7 -20   0    0.00   10.50
  -7  20   0    0.30   14.70
   7  20   0   41.30   15.80
   0 -21   0    5.30    6.90
   0  21   0    9.60    6.20
  -1 -21   0  895.11   35.90
   1 -21   0  945.11   37.90
   1  21   0  986.70   38.00
  -1  21   0  887.91   37.80
   2 -21   0  226.58   19.90
  -2 -21   0  253.97   17.50
   2  21   0  248.08   17.20
   2  21   0  226.88   20.30
  -2  21   0  258.27   19.50
   3 -21   0   11.50    8.20
  -3 -21   0    0.00    5.80
  -3  21   0    9.30    8.30
   3  21   0    0.00    5.40
   3  21   0    2.90    9.70
   4 -21   0  265.07   20.20
  -4 -21   0  224.48   16.80
  -4  21   0  224.38   22.80
   4  21   0  268.67   23.40
   4  21   0  262.97   19.00
   5 -21   0  223.98   22.00
   5  21   0  194.68   19.30
  -5  21   0  232.38   25.30
   5  21   0  264.47   27.90
   6 -21   0  127.29   18.10
   6  21   0  119.39   23.60
  -6  21   0  108.89   20.40
   6  21   0  127.89   17.00
   7 -21   0  170.78   20.80
  -7  21   0  178.38   26.30
   7  21   0  176.48   28.40
   0 -22   0  904.61   36.80
   0  22   0  896.71   37.30
  -1 -22   0   34.60    9.50
   1 -22   0   15.20    8.10
  -1  22   0    9.90    8.40
   1  22   0   23.10    8.30
  -2 -22   0  116.29   14.00
   2 -22   0  147.29   16.70
  -2  22   0  122.39   16.30
   2  22   0  102.49   13.30
  -3 -22   0    0.00    6.50
   3 -22   0    6.10    7.50
  -3  22   0    0.00    7.90
   3  22   0    0.00    6.70
   4 -22   0   29.00   10.90
  -4 -22   0   32.80    9.00
   4  22   0   25.20   12.30
   4  22   0   29.10    9.80
  -4  22   0   24.90   11.20
   5 -22   0  118.29   17.10
   5  22   0  105.89   15.40
   5  22   0  131.89   21.40
  -5  22   0  107.59   18.20
   6 -22   0  280.97   25.30
   6  22   0  241.28   30.00
   6  22   0  253.77   23.40
  -6  22   0  201.68   26.30
   7 -22   0    7.50    9.70
  -7  22   0    4.90   16.00
   7  22   0   31.00   18.60
   0 -23   0   15.60    7.60
   0  23   0    4.30    7.20
  -1 -23   0    3.50    7.10
   1 -23   0    0.00    7.20
   1  23   0    2.00    6.80
  -1  23   0    4.20    7.50
  -2 -23   0  352.36   21.30
   2 -23   0  338.37   22.70
  -2  23   0  349.87   24.00
   2  23   0  346.97   21.60
  -3 -23   0   35.70    9.60
   3 -23   0   34.00   10.60
  -3  23   0   24.20   11.10
   3  23   0   12.40    8.50
   4 -23   0   17.00   10.50
  -4  23   0   34.50   11.80
   4  23   0   32.40   10.20
   5 -23   0    6.80    9.20
  -5  23   0   22.50   13.40
   5  23   0   19.80    9.80
   6 -23   0   14.80   11.00
   6  23   0   25.30   11.00
  -6  23   0   10.30   14.30
   7 -23   0    7.90   11.20
  -7  23   0   33.20   17.30
   0 -24   0  146.29   16.20
   0  24   0  112.09   14.80
  -1 -24   0   20.10    8.80
   1 -24   0   23.00    9.30
   1  24   0    8.60    7.50
  -1  24   0   30.70    9.70
   2 -24   0  236.48   20.80
  -2 -24   0  269.87   19.20
   2  24   0  250.67   18.80
  -2  24   0  223.58   22.10
  -3 -24   0  633.74   29.40
   3 -24   0  638.94   32.10
   3  24   0  592.74   29.60
  -3  24   0  535.55   31.60
   4 -24   0   59.99   13.50
   4  24   0   57.69   12.50
  -4  24   0   49.00   14.40
   5 -24   0   98.99   16.20
   5  24   0  100.29   15.60
  -5  24   0   77.49   17.60
   6 -24   0  100.69   17.50
  -6  24   0   88.19   20.50
   6  24   0  129.49   18.30
   0 -25   0    2.30    7.40
   0  25   0    0.00    7.30
   1 -25   0  584.74   30.10
  -1 -25   0  545.95   28.20
  -1  25   0  568.44   31.00
   1  25   0  556.14   29.40
   2 -25   0    1.70    8.40
  -2 -25   0   16.80    8.50
   2  25   0   13.40    8.50
  -2  25   0   17.60    9.60
   3 -25   0   33.80   10.80
  -3 -25   0   39.80   10.60
   3  25   0   41.10   10.40
  -3  25   0   10.80   10.40
   4 -25   0  360.26   25.00
  -4  25   0  338.57   27.40
   4  25   0  331.47   22.70
   5 -25   0  180.38   21.50
   5  25   0  163.98   19.20
  -5  25   0  205.18   25.60
   6 -25   0  122.39   18.10
   6  25   0  124.09   18.40
  -6  25   0   93.69   22.20
   0 -26   0  316.97   21.60
   0  26   0  283.67   21.20
   1 -26   0   13.50    9.00
  -1 -26   0   13.90    9.00
   1  26   0   26.50    9.90
  -1  26   0   42.80   11.90
  -2 -26   0    5.90    8.20
   2 -26   0    3.00    8.40
   2  26   0    1.30    6.90
  -2  26   0    3.80    9.00
  -3 -26   0    5.40    8.40
   3 -26   0   31.60   10.60
   3  26   0    0.00    7.20
  -3  26   0    0.00    9.50
   4 -26   0    4.50    9.00
  -4  26   0   45.70   14.40
   4  26   0   45.30   12.00
   5 -26   0   48.60   13.70
   5  26   0   59.89   13.50
  -5  26   0   47.80   16.40
   6 -26   0   89.59   16.80
   6  26   0   77.39   15.80
  -6  26   0   47.20   16.70
   0 -27   0    0.90    7.90
   0  27   0    0.00    7.10
  -1 -27   0    0.00    7.50
   1 -27   0    0.00    7.50
   1  27   0    4.70    7.70
  -1  27   0    0.00    8.40
  -2 -27   0    5.00    8.20
   2 -27   0   13.50    9.50
   2  27   0   11.00    8.50
  -2  27   0    4.70    9.90
  -3 -27   0   10.30    9.40
   3 -27   0   11.40    8.40
   3  27   0    0.00    7.20
  -3  27   0    0.00   10.70
   4 -27   0   27.20   11.50
   4  27   0   39.90   12.20
  -4  27   0   67.39   16.50
   5 -27   0    3.70   10.40
   5  27   0    3.20    8.40
  -5  27   0    0.00   11.60
   0 -28   0  245.48   22.70
   0  28   0  198.48   21.50
  -1 -28   0    5.10    8.50
   1 -28   0    1.00    7.40
  -1  28   0    9.40    9.50
   1  28   0    0.00    7.30
  -2 -28   0  497.95   27.60
   2 -28   0  435.46   28.20
  -2  28   0  460.75   29.50
   2  28   0  447.96   27.80
  -3 -28   0  310.07   22.80
   3 -28   0  319.87   27.80
   3  28   0  278.87   21.70
  -3  28   0  285.77   28.10
   4 -28   0  223.88   24.40
   4  28   0  196.58   21.50
  -4  28   0  176.68   24.00
   5 -28   0   47.10   14.80
  -5  28   0   80.89   20.50
   5  28   0   71.59   14.30
   0 -29   0    0.00    8.40
   0  29   0    6.90    9.10
   1 -29   0  544.15   31.20
  -1 -29   0  575.14   31.00
  -1  29   0  501.15   31.20
   1  29   0  561.14   31.50
   2 -29   0   17.80   11.00
  -2 -29   0   32.70   11.10
  -2  29   0   18.50   11.80
   2  29   0   32.20   11.20
  -3 -29   0    0.90    9.50
   3 -29   0    0.30    9.10
   3  29   0    0.00    8.90
  -3  29   0    0.00   10.90
   4 -29   0   53.79   14.30
  -4  29   0   31.30   14.50
   4  29   0   56.29   14.50
   5 -29   0  128.19   20.10
  -5  29   0  109.19   22.50
   5  29   0  143.69   19.70
   0 -30   0  292.47   25.20
   0  30   0  243.08   24.30
  -1 -30   0    0.10    9.00
   1 -30   0   10.10    9.00
  -1  30   0   13.90   11.30
   1  30   0   14.20   10.70
  -2 -30   0    7.80    9.40
   2 -30   0    0.00    8.60
  -2  30   0    0.00   10.80
   2  30   0    0.00    9.50
  -3 -30   0   38.90   12.80
   3 -30   0   45.10   14.00
   3  30   0   29.20   12.00
  -3  30   0   40.40   14.20
   4 -30   0    0.00   10.40
  -4  30   0    0.00   11.30
   4  30   0    4.40    9.90
   0 -31   0    5.40    9.20
   0  31   0    0.00    9.40
   1 -31   0   44.50   13.30
  -1 -31   0   37.30   13.10
  -1  31   0   47.10   14.00
   1  31   0   26.30   12.10
  -2 -31   0   53.99   13.30
   2 -31   0   36.80   13.40
  -2  31   0   39.10   14.10
   2  31   0   36.10   12.80
  -3 -31   0    0.00    9.50
   3 -31   0    1.20   10.30
   3  31   0    5.90   10.00
  -3  31   0    0.00   12.20
   4 -31   0    0.00    9.60
   4  31   0    6.10   11.00
  -4  31   0   24.50   14.40
   0 -32   0  435.76   29.30
   0  32   0  435.66   30.80
  -1 -32   0    1.20   10.40
   1 -32   0   10.60   10.90
   1  32   0   11.10   11.00
  -1  32   0    0.00   10.60
  -2 -32   0  252.87   24.80
   2 -32   0  239.48   24.80
  -2  32   0  259.07   28.00
   2  32   0  279.37   26.50
   3 -32   0  162.18   21.50
  -3  32   0  131.89   21.20
   3  32   0  164.98   21.70
   0 -33   0    0.60    8.80
   0  33   0    0.00   10.90
  -1 -33   0  584.04   34.60
   1 -33   0  576.44   35.10
  -1  33   0  567.14   36.90
   1  33   0  612.84   35.70
  -2 -33   0  136.19   19.70
   2 -33   0   84.59   17.20
   2  33   0  141.49   20.20
  -2  33   0  131.99   20.90
   0 -34   0  108.39   18.40
   0  34   0  120.29   20.00
  -1 -34   0    0.00   10.30
   1 -34   0    6.50   12.50
   1  34   0    7.20   11.60
  -1  34   0    5.40   13.20
   9   0  -1    5.70   18.90
   8   0  -1    2.20   10.50
   8   0  -1    2.30   15.20
   7   0  -1   60.29   19.20
   7   0  -1    0.00    9.60
   6   0  -1    0.00    9.20
  -5   0   1    0.00    3.30
   5   0  -1    0.00    5.90
  -4   0   1    0.00   10.80
  -4   0   1    0.00    2.70
   4   0  -1    0.00    5.10
  -3   0   1    7.30   10.30
   3   0  -1    0.00    5.60
  -3   0   1    0.50    2.60
   3   0  -1    0.00    2.70
  -2   0   1   30.50   10.20
   2   0  -1    2.30    2.10
   2   0  -1    0.00    5.10
  -1   0   1   20.10    4.50
   0   0   1    3.70    2.40
   0   0  -1    0.70    1.50
   0   0   1    0.20    1.40
   0   0  -1    0.80    1.60
  -1   0  -1    0.00    2.90
   1   0   1    0.60    2.20
   1   0   1    0.70    4.40
  -2   0  -1    1.70    3.70
   2   0   1    0.00    3.40
   2   0   1    7.40    7.30
   3   0   1    0.00    4.50
   3   0   1    2.70    8.40
  -3   0  -1    6.70    4.20
   4   0   1    0.00    4.70
  -4   0  -1    0.40    4.30
   4   0   1   22.00   10.50
  -5   0  -1    0.00    5.30
   5   0   1   25.80   12.30
   6   0   1    0.00    7.10
   6   0   1    8.60   13.50
  -6   0  -1    0.00    5.30
   7   0   1   27.10   16.50
   8   0   1   21.00   17.50
   9   0   1    3.70   19.10
   9  -1  -1   10.60   19.10
   9   1  -1   15.10   19.40
   8  -1  -1  120.29   24.30
   8  -1  -1   48.80   14.60
   8   1  -1   38.80   13.70
   8   1  -1   36.00   18.20
   7  -1  -1  475.05   29.70
   7  -1  -1  542.55   39.40
   7   1  -1  390.66   36.00
   7   1  -1  473.65   28.40
   6  -1  -1  959.60   53.59
   6  -1  -1 1014.50   42.80
   6   1  -1 1016.60   54.09
   6   1  -1  982.40   41.30
   5  -1  -1    0.00    6.30
  -5  -1   1    3.20    3.40
  -5   1   1   21.40   13.00
   5   1  -1    0.00   11.20
   5   1  -1    0.00    6.50
  -5   1   1    2.80    3.40
  -4  -1   1    0.00   10.90
  -4  -1   1    0.30    2.80
   4  -1  -1    0.00    5.30
  -4   1   1    0.00   10.10
  -4   1   1    1.00    3.20
   4   1  -1    0.00    5.60
  -3  -1   1  502.85   28.40
  -3  -1   1  451.45   14.20
   3  -1  -1  441.36   21.30
  -3   1   1  516.85   28.30
  -3   1   1  460.85   15.30
   3   1  -1  475.75   21.30
   3   1  -1  462.75   14.70
   2  -1  -1  418.66   13.80
  -2  -1   1  502.15   25.30
   2  -1  -1  422.76   19.10
  -2   1   1  460.55   25.00
   2   1  -1  441.46   19.20
   1  -1  -1 7708.23  191.78
  -1  -1   1 7306.07  245.98
   1  -1  -1 7786.62  204.48
   1   1  -1 7928.01  204.48
  -1   1   1 7521.75  246.48
   1   1  -1 7381.36  246.08
  -1   1   1 7594.34  191.68
   0  -1   1 1935.51   52.49
   0  -1  -1 1935.71   50.79
   0  -1   1 1935.41   63.39
   0   1  -1 1892.31   50.79
   0   1  -1 1963.20   52.49
   0   1   1 1865.11   50.69
   0   1   1 2009.50   64.19
   0   1   1 1973.20   52.69
   1  -1   1  285.97   13.90
  -1  -1  -1  280.77   10.90
   1  -1   1  256.17    9.10
  -1   1  -1  254.87    9.70
   1   1   1  275.87   14.10
   1   1   1  254.77    8.80
  -1   1  -1  272.07   11.10
   2  -1   1  929.11   29.50
   2  -1   1  955.70   38.50
  -2  -1  -1  936.11   28.80
   2   1   1  945.41   38.60
  -2   1  -1  945.71   29.20
   2   1   1  930.21   29.00
   3  -1   1  429.96   24.90
   3  -1   1  416.86   18.00
  -3  -1  -1  411.96   16.80
   3   1   1  423.26   24.90
  -3   1  -1  374.66   16.70
   3   1   1  368.36   17.10
   4  -1   1  135.89   17.80
   4  -1   1   97.79   11.40
  -4  -1  -1  114.29   10.00
   4   1   1  143.29   18.70
  -4   1  -1   89.29    9.70
   4   1   1  116.79   11.60
   5  -1   1  741.23   41.70
  -5  -1  -1  716.73   27.40
   5  -1   1  768.42   31.10
  -5   1  -1  755.22   27.90
   5   1   1  705.73   41.50
   5   1   1  734.93   30.20
  -6  -1  -1   21.90    7.00
   6  -1   1   15.80   10.50
   6   1   1   49.40   17.30
   6   1   1    0.00    8.40
   7  -1   1   69.29   21.00
   7   1   1  126.59   24.10
   8  -1   1  155.38   28.30
   8   1   1  104.19   24.90
   9  -1   1  102.89   26.80
   9   1   1   37.50   19.50
   9  -2  -1  148.19   31.30
   9   2  -1  170.18   32.10
   8  -2  -1  239.18   34.00
   8  -2  -1  334.77   25.90
   8   2  -1  345.87   24.90
   8   2  -1  316.97   38.80
   7  -2  -1  715.43   47.60
   7  -2  -1  753.72   37.80
   7   2  -1  786.72   48.20
   7   2  -1  691.43   35.20
   6  -2  -1  185.18   21.30
  -6   2   1  241.08   13.20
   6   2  -1  189.08   20.10
   6   2  -1  360.06   30.70
  -5  -2   1  363.96   14.10
   5  -2  -1  369.26   22.30
   5   2  -1  419.06   22.70
   5   2  -1  364.86   29.20
  -5   2   1  401.96   30.40
  -5   2   1  369.06   15.70
  -4  -2   1   19.50    3.60
   4  -2  -1    4.80    6.70
  -4   2   1   21.90    4.60
  -4   2   1   20.40   12.20
   4   2  -1   23.90    7.60
  -3  -2   1   15.90    2.60
   3  -2  -1    9.80    6.60
  -3  -2   1   16.80   10.30
   3   2  -1   18.70    6.30
  -3   2   1   14.00    3.60
   3   2  -1   15.00    2.80
  -3   2   1   37.40   11.90
  -2  -2   1 2945.41  105.99
   2  -2  -1 3207.48   80.19
   2  -2  -1 3176.58   88.39
  -2   2   1 3003.30  106.49
   2   2  -1 3037.50   87.69
   1  -2  -1 1832.12   47.00
  -1  -2   1 1748.53   61.19
   1   2  -1 1884.71   45.70
  -1   2   1 1656.33   51.39
  -1   2   1 1793.92   46.90
  -1   2   1 1734.13   62.09
   1   2  -1 1807.12   51.09
   0  -2  -1 2582.74   67.79
   0  -2   1 2632.34   70.49
   0  -2  -1 2467.95   85.59
   0  -2  -1 2718.23   70.59
   0  -2   1 2570.84   84.29
   0   2  -1 2606.24   67.99
   0   2   1 2595.24   85.89
   0   2   1 2729.83   70.69
   0   2  -1 2573.74   70.39
   1  -2   1  105.79    9.50
   1  -2   1   91.69    5.50
  -1  -2  -1  107.39    6.90
   1   2   1  108.49    5.40
  -1   2  -1  113.39    6.20
  -1   2  -1  131.29    8.00
   1   2   1  110.09   10.00
   2  -2   1   17.60    4.90
  -2  -2  -1   19.50    4.60
   2  -2   1   35.70    8.80
   2   2   1   19.00    7.70
  -2   2  -1   23.00    5.40
   2   2   1   26.20    4.40
  -3  -2  -1  970.90   30.80
   3  -2   1  948.61   32.80
   3  -2   1  984.20   42.60
   3   2   1  951.60   42.70
  -3   2  -1  954.80   31.30
   3   2   1  984.50   32.00
   4  -2   1 1359.66   44.80
  -4  -2  -1 1299.37   41.00
   4  -2   1 1307.87   57.29
   4   2   1 1349.86   43.80
  -4   2  -1 1336.07   41.80
   4   2   1 1294.37   57.69
   5  -2   1    0.00    8.60
  -5  -2  -1   22.20    6.70
   5   2   1   80.89   16.80
   5   2   1   11.00    8.60
  -5   2  -1   30.20    7.50
   6  -2   1  756.32   33.60
   6  -2   1  706.03   44.60
   6   2   1  825.82   33.40
  -6   2  -1  797.32   30.40
   6   2   1  716.03   45.20
   7  -2   1   65.09   19.20
   7   2   1   31.10   16.60
   8  -2   1  300.87   36.10
   8   2   1  200.48   32.30
   9  -2   1  288.17   39.30
   9   2   1  320.17   41.30
   9  -3  -1   60.29   23.20
   9   3  -1   59.39   22.40
   8  -3  -1   15.50   18.50
   8  -3  -1   20.60   12.30
   8   3  -1   44.40   20.10
   8   3  -1   54.89   14.40
   7  -3  -1  719.13   36.70
   7  -3  -1  594.74   44.30
   7   3  -1  758.02   46.80
   7   3  -1  733.53   35.70
   6  -3  -1  575.74   30.70
   6   3  -1  533.45   38.10
  -6   3   1  585.54   22.20
   6   3  -1  530.75   28.30
   5  -3  -1   22.00    9.40
  -5  -3   1   38.00    5.00
  -5   3   1   64.19   16.90
  -5   3   1   47.90    6.70
   5   3  -1   31.70    9.40
   5   3  -1   43.50   14.90
   4  -3  -1   81.89   11.30
  -4  -3   1   71.39    5.30
  -4   3   1   80.89   16.30
   4   3  -1   82.19   16.20
   4   3  -1   77.09    5.90
   4   3  -1   98.79   11.50
  -4   3   1   71.49    7.10
   3  -3  -1   11.50    6.30
  -3  -3   1    6.90    9.90
   3   3  -1   11.60    6.00
  -3   3   1   15.80    3.90
  -3   3   1   10.10   10.80
   2  -3  -1 1339.27   42.50
  -2  -3   1 1291.37   50.69
   2  -3  -1 1335.17   36.90
   2   3  -1 1322.07   41.70
  -2   3   1 1311.57   51.29
  -1  -3   1 3632.94   89.49
  -1  -3   1 3464.45  115.79
   1  -3  -1 3490.35   90.69
   1   3  -1 3456.85  115.69
   1   3  -1 3448.85   96.59
   1   3  -1 3583.34   89.39
  -1   3   1 3477.05  116.99
  -1   3   1 3486.55   97.29
   0  -3   1 2003.70   54.99
   0  -3  -1 2007.00   54.99
   0  -3  -1 2011.30   66.99
   0  -3  -1 1965.70   53.09
   0   3   1 1954.10   66.99
   0   3   1 2042.90   55.19
   0   3  -1 2066.09   53.39
   0   3  -1 1967.40   54.99
  -1  -3  -1   15.00    3.00
  -1  -3  -1    9.10    3.60
   1  -3   1   16.70    5.40
   1  -3   1   15.90    2.90
  -1   3  -1   11.30    3.10
   1   3   1   11.60    5.50
   1   3   1   16.00    2.70
  -1   3  -1   11.10    4.00
  -2  -3  -1  787.82   24.40
   2  -3   1  760.32   32.30
  -2   3  -1  751.42   25.20
   2   3   1  757.72   24.30
   2   3   1  737.53   32.60
  -2   3  -1  729.93   25.60
   3  -3   1    7.30    4.60
   3  -3   1   14.10    7.60
  -3  -3  -1    0.00    3.90
   3   3   1    0.00    3.60
  -3   3  -1    6.40    4.60
   3   3   1    0.00    8.10
   4  -3   1  426.96   21.10
   4  -3   1  490.45   29.30
  -4  -3  -1  444.26   18.70
  -4   3  -1  431.26   19.70
   4   3   1  471.95   29.20
   4   3   1  435.76   20.30
  -5  -3  -1 1033.40   34.10
   5  -3   1 1029.20   38.80
   5  -3   1  998.90   50.39
   5   3   1  983.10   36.90
   5   3   1  945.91   49.80
  -5   3  -1 1031.80   35.60
   6  -3   1  132.39   22.70
   6  -3   1  127.29   15.50
   6   3   1  160.18   23.90
  -6   3  -1  107.19   12.20
   6   3   1  124.09   14.90
   7  -3   1  165.68   27.20
   7   3   1  124.39   24.70
   8  -3   1  279.17   36.40
   8   3   1  266.27   34.80
   9  -3   1   22.60   20.10
   9   3   1  118.29   27.50
   9  -4  -1   16.00   18.90
   9   4  -1   17.60   20.30
   8  -4  -1   67.79   22.60
   8  -4  -1   83.79   16.10
   8   4  -1   66.49   22.30
   8   4  -1   66.09   14.40
   7  -4  -1   99.99   17.00
   7  -4  -1  151.28   25.70
   7   4  -1  184.98   27.10
   7   4  -1  103.19   16.60
   6  -4  -1    0.00    8.20
   6   4  -1   16.10   13.90
   6   4  -1    0.00    7.50
  -6   4   1    8.50    5.00
  -5  -4   1  110.09    7.20
   5  -4  -1  107.79   14.30
   5   4  -1   99.29   18.00
  -5   4   1   96.79   19.80
  -5   4   1  100.29    9.30
   5   4  -1  116.29   13.70
   4  -4  -1   43.40    9.30
   4   4  -1   59.79   14.40
  -4   4   1   43.60    6.20
  -4   4   1   70.19   15.60
   4   4  -1   19.20    7.60
   4   4  -1   53.29    4.50
   3  -4  -1  324.77   18.30
  -3  -4   1  348.87   10.80
   3   4  -1  343.97   10.60
   3   4  -1  314.97   17.30
  -3   4   1  295.47   23.60
   2  -4  -1    0.30    3.10
  -2  -4   1    0.00    8.20
  -2  -4   1    0.00    1.70
   2   4  -1    0.00    4.70
  -2   4   1    1.70    5.70
  -2   4   1    3.70    9.80
   2   4  -1    0.00    1.80
   1  -4  -1   10.40    3.30
  -1  -4   1    2.80    5.80
  -1  -4   1   11.40    2.70
  -1   4   1   12.00    7.60
   1   4  -1   11.40    3.80
  -1   4   1    9.70    4.30
   1   4  -1   10.90    2.60
   1   4  -1    3.10    6.20
   0  -4  -1 1877.31   50.49
   0   4  -1 1959.50   50.79
   0   4  -1 1869.11   52.29
   0   4   1 1845.42   52.29
   0   4   1 1835.52   63.59
   1  -4   1    1.30    5.10
  -1  -4  -1    9.30    3.60
   1   4   1   10.10    2.90
  -1   4  -1    7.90    3.40
   1   4   1    8.40    5.80
  -1   4  -1    9.60    4.40
   2  -4   1   28.90    8.50
  -2  -4  -1   38.50    5.30
  -2   4  -1   29.30    5.80
   2   4   1   18.30    8.00
   2   4   1   30.20    4.80
  -2   4  -1   20.90    5.50
  -3  -4  -1   14.00    4.60
   3  -4   1    6.40    8.40
  -3   4  -1    8.20    5.00
   3   4   1    8.00    4.50
   3   4   1   13.20    9.20
   4  -4   1    0.00    5.10
  -4  -4  -1    1.40    4.10
   4  -4   1   11.30    9.60
   4   4   1    0.00    4.80
   4   4   1    0.00    9.10
  -4   4  -1    0.00    5.10
   5  -4   1   68.29   11.70
  -5  -4  -1  106.09   10.90
   5  -4   1  141.49   19.90
   5   4   1   79.09   11.40
  -5   4  -1   98.99   11.10
   6  -4   1   46.60   10.90
   6  -4   1   73.39   19.00
   6   4   1   48.60   16.80
  -6   4  -1   46.90    9.40
   6   4   1   50.29   10.50
   7  -4   1   18.90   16.40
   7   4   1   33.50   16.90
   8  -4   1    9.30   17.00
   8   4   1   73.29   21.50
   9  -4   1   53.09   23.80
   9   4   1   38.80   21.30
   9  -5  -1    0.00   17.30
   9   5  -1    0.00   18.40
   8  -5  -1   62.09   14.90
   8  -5  -1   54.99   21.10
   8   5  -1   50.69   21.00
   8   5  -1   62.19   14.60
   7  -5  -1  240.88   23.60
   7  -5  -1  235.58   29.80
   7   5  -1  250.07   32.10
   7   5  -1  269.17   23.20
   6  -5  -1  672.73   33.30
  -6   5   1  639.24   24.80
   6   5  -1  619.54   40.70
   6   5  -1  638.54   30.90
  -6   5   1  613.74   41.40
   5  -5  -1    3.50    7.70
  -5  -5   1   10.90    3.60
   5   5  -1   17.80   13.00
   5   5  -1   15.40    7.50
  -5   5   1   19.90   14.00
  -5   5   1   11.50    5.10
   4  -5  -1   29.70    8.20
  -4  -5   1   28.90    3.80
   4   5  -1   20.50    7.40
  -4   5   1   39.10    6.10
   4   5  -1   28.90    3.70
  -4   5   1   26.10   13.30
   4   5  -1   29.20   12.30
  -3  -5   1  810.32   22.70
   3   5  -1  789.32   22.40
   3   5  -1  800.52   37.90
  -3   5   1  809.42   38.60
   3   5  -1  822.32   30.30
   2  -5  -1  366.06   14.10
  -2  -5   1  318.97   11.00
  -2   5   1  318.77   18.00
  -2   5   1  384.26   23.10
   2   5  -1  338.77   11.20
   2   5  -1  312.17   15.90
   2   5  -1  366.56   21.10
   1  -5  -1 1239.98   36.60
   1   5  -1 1278.27   38.70
   1   5  -1 1341.87   45.50
  -1   5   1 1253.17   48.00
  -1   5   1 1317.07   39.70
   0  -5  -1    4.00    3.10
   0   5  -1    3.00    2.70
   0   5   1    4.40    5.50
   0   5   1    4.10    3.00
   0   5  -1    2.20    3.20
  -1  -5  -1  330.27   12.90
   1  -5   1  368.76   16.30
   1   5   1  307.87   17.20
  -1   5  -1  320.67   14.30
  -1   5  -1  328.87   13.10
   1   5   1  324.17   12.30
  -2  -5  -1  530.45   18.80
   2  -5   1  552.14   25.80
   2   5   1  514.85   18.70
   2   5   1  538.95   26.20
  -2   5  -1  508.35   20.10
  -2   5  -1  557.24   20.80
   3  -5   1 1086.79   46.00
  -3  -5  -1 1027.70   32.90
  -3   5  -1 1065.49   35.10
  -3   5  -1 1096.89   37.70
   3   5   1 1069.49   46.00
   3   5   1 1046.20   34.70
   4  -5   1  434.96   21.50
   4  -5   1  498.25   29.70
  -4  -5  -1  452.85   18.80
   4   5   1  473.85   29.80
   4   5   1  437.56   20.20
  -4   5  -1  397.76   19.90
  -5  -5  -1  806.32   28.20
   5  -5   1  744.53   32.10
   5  -5   1  776.72   42.30
   5   5   1  754.72   30.50
  -5   5  -1  750.72   29.50
   5   5   1  727.43   42.30
   6  -5   1   56.59   16.90
   6   5   1    0.00    6.80
   6   5   1   22.20   15.10
  -6   5  -1   36.30    8.30
   7  -5   1  225.08   30.60
   7   5   1  204.38   30.10
   8  -5   1   65.99   22.50
   8   5   1   18.00   17.70
   9  -5   1  165.38   31.80
   9   5   1  106.49   26.60
   9  -6  -1    1.30   18.80
   9   6  -1    0.00   17.80
   8  -6  -1  163.58   29.60
   8  -6  -1  196.48   22.90
   8   6  -1  203.68   22.00
   8   6  -1  173.38   30.00
   7  -6  -1  188.38   21.20
   7  -6  -1  212.98   30.50
   7   6  -1  223.48   30.60
   7   6  -1  205.88   20.50
   6  -6  -1  383.36   25.90
   6   6  -1  465.15   26.50
   6   6  -1  463.15   34.70
  -6   6   1  441.36   20.30
  -6   6   1  484.55   36.20
  -5  -6   1  616.64   19.10
   5  -6  -1  549.74   28.80
  -5   6   1  561.24   22.80
   5   6  -1  571.14   27.50
  -5   6   1  587.54   37.20
   5   6  -1  602.84   36.80
  -4  -6   1  319.47   11.50
   4  -6  -1  299.87   19.40
  -4   6   1  321.07   26.70
   4   6  -1  298.67   18.00
   4   6  -1  307.37   24.40
  -4   6   1  290.27   14.90
  -3  -6   1   95.99    5.80
  -3   6   1  112.89   16.40
   3   6  -1   98.59   14.40
  -3   6   1  101.89   12.50
   3   6  -1  122.69   11.60
   3   6  -1   96.59    6.10
  -2  -6   1 7781.72  196.98
   2  -6  -1 7762.92  200.08
  -2   6   1 7573.84  212.98
  -2   6   1 7395.86  255.67
   2   6  -1 8161.08  255.27
   2   6  -1 7880.61  211.58
  -1  -6   1  696.93   21.70
   1  -6  -1  675.43   22.70
   1   6  -1  708.83   23.80
   1   6  -1  741.03   27.10
  -1   6   1  723.03   25.10
   1   6  -1  722.43   27.80
  -1   6   1  676.53   30.90
   0  -6  -1   32.70    5.00
   0   6  -1   30.80    5.10
   0   6   1   34.80    4.60
   0   6  -1   30.80    4.50
   0   6   1   39.30    7.90
  -1  -6  -1  707.13   21.60
  -1   6  -1  660.53   22.90
   1   6   1  678.63   27.20
  -1   6  -1  632.14   21.60
   1   6   1  591.94   20.80
   2  -6   1    6.00    7.30
  -2  -6  -1    3.60    3.60
  -2   6  -1    0.10    4.20
  -2   6  -1    4.20    4.40
   2   6   1    1.10    3.30
   2   6   1    1.80    7.00
  -3  -6  -1 1758.42   51.39
   3  -6   1 1835.72   69.29
   3   6   1 1891.91   69.89
  -3   6  -1 1771.82   56.79
   3   6   1 1744.13   53.89
  -3   6  -1 1771.32   53.89
  -4  -6  -1 1946.31   55.79
   4  -6   1 1940.41   76.59
   4  -6   1 1927.01   61.59
   4   6   1 1902.11   59.39
  -4   6  -1 1889.01   57.99
   4   6   1 1868.01   76.29
  -5  -6  -1   21.20    6.40
   5  -6   1   49.10   14.60
   5  -6   1   34.30    9.30
   5   6   1   13.20    7.60
  -5   6  -1   29.10    7.50
   5   6   1   47.50   14.80
   6  -6   1  532.85   37.80
   6  -6   1  609.14   29.50
  -6   6  -1  588.34   26.10
   6   6   1  525.65   38.20
   6   6   1  560.94   27.00
   7  -6   1   92.89   21.90
   7   6   1   97.99   22.20
   8  -6   1  230.68   33.80
   8   6   1  193.28   31.70
   9  -6   1  481.25   44.50
   9   6   1  456.35   43.60
   9  -7  -1   34.60   22.40
   9   7  -1   53.39   23.90
   8  -7  -1    0.00   10.70
   8  -7  -1    0.00   15.40
   8   7  -1   18.00   11.70
   8   7  -1   38.50   20.40
   7  -7  -1  229.88   23.80
   7   7  -1  290.07   33.90
   7   7  -1  285.97   21.50
   6  -7  -1  526.95   30.10
  -6   7   1  526.05   38.20
  -6   7   1  621.94   24.70
   6   7  -1  569.04   28.90
   6   7  -1  509.85   37.80
   5  -7  -1  420.36   24.30
  -5  -7   1  400.56   14.60
   5   7  -1  428.26   23.30
  -5   7   1  382.26   18.50
  -5   7   1  393.46   31.40
   5   7  -1  365.26   29.10
   4  -7  -1  425.76   22.90
  -4  -7   1  397.16   14.10
   4   7  -1  436.96   28.10
   4   7  -1  428.76   21.50
  -4   7   1  366.76   28.70
   3  -7  -1  351.16   15.90
  -3  -7   1  340.27   12.10
  -3   7   1  354.36   25.20
   3   7  -1  355.06   18.10
   3   7  -1  327.17   22.50
  -3   7   1  330.27   19.30
   2  -7  -1  634.24   22.30
  -2  -7   1  635.64   19.60
   2   7  -1  650.03   28.70
  -2   7   1  614.94   30.60
  -2   7   1  638.04   25.20
   2   7  -1  607.24   23.60
   1  -7  -1  524.25   19.20
  -1  -7   1  527.65   18.00
   1   7  -1  557.94   21.70
  -1   7   1  511.05   20.20
   1   7  -1  517.25   19.60
  -1   7   1  563.24   26.90
   0  -7  -1  102.09    8.20
   0   7   1  116.59    8.20
   0   7   1  121.49   11.20
   0   7  -1  113.49    8.00
   0   7  -1  111.29    8.80
   1  -7   1    1.60    6.00
  -1  -7  -1    2.80    3.50
  -1   7  -1    0.00    5.50
   1   7   1    3.00    3.20
  -1   7  -1    0.30    3.50
   1   7   1    0.00    5.60
  -1   7  -1    0.00    3.90
  -2  -7  -1  684.03   22.70
   2   7   1  662.93   23.00
   2   7   1  674.93   30.20
  -2   7  -1  659.53   24.50
  -2   7  -1  636.64   24.60
   3  -7   1    0.00    8.20
  -3  -7  -1    6.80    4.10
   3   7   1    5.20    8.80
   3   7   1    0.70    4.40
  -3   7  -1    0.00    5.00
  -3   7  -1    0.00    4.50
  -4  -7  -1 1294.37   41.30
   4  -7   1 1363.06   58.19
   4   7   1 1394.76   58.79
   4   7   1 1325.77   44.30
  -4   7  -1 1319.77   47.90
  -4   7  -1 1336.97   44.10
   5  -7   1  419.56   31.10
   5  -7   1  405.96   23.20
  -5  -7  -1  467.55   19.80
   5   7   1  451.65   22.00
  -5   7  -1  429.46   21.70
   5   7   1  409.76   31.00
   6  -7   1  108.79   20.90
   6  -7   1   98.59   13.80
   6   7   1  103.19   13.60
   6   7   1  128.49   21.50
  -6   7  -1  106.19   13.00
   7  -7   1   69.19   20.50
   7   7   1   82.99   21.30
   8  -7   1  268.27   36.70
   8   7   1  271.97   35.40
   9  -7   1   92.79   26.10
   9   7   1  172.18   31.70
   9  -8  -1    1.70   18.10
   9   8  -1   32.10   20.20
   8  -8  -1   23.80   18.60
   8  -8  -1   24.10   13.10
   8   8  -1   18.20   12.30
   8   8  -1    6.00   17.90
   7  -8  -1    4.00    9.10
   7   8  -1   31.50   17.70
   7   8  -1   14.00   10.00
   6  -8  -1   41.10   11.70
   6   8  -1   16.80    9.60
   6   8  -1   53.19   17.10
  -6   8   1   45.80   17.80
   5  -8  -1   84.49   13.30
   5   8  -1   70.89   11.70
   5   8  -1   81.39   17.50
  -5   8   1   69.39   18.30
  -4  -8   1  187.88    9.10
   4   8  -1  186.28   21.10
  -4   8   1  204.08   23.90
   4   8  -1  185.08   14.60
  -4   8   1  187.28   18.30
  -3  -8   1  854.11   26.90
   3  -8  -1  948.51   31.40
   3   8  -1  958.70   41.40
  -3   8   1  942.81   43.20
   3   8  -1  948.61   33.60
  -3   8   1  937.61   36.50
   2  -8  -1   38.30    6.10
  -2  -8   1   29.70    4.50
   2   8  -1   33.80    8.60
   2   8  -1   31.50    6.20
  -2   8   1   32.40   10.90
  -2   8   1   15.90    6.70
   1  -8  -1   57.59    6.80
  -1  -8   1   53.69    6.00
  -1   8   1   43.00   10.70
  -1   8   1   58.39    7.30
   1   8  -1   44.20    6.40
   1   8  -1   49.40    6.30
   0  -8  -1  208.78   11.00
   0   8  -1  214.58   11.50
   0   8   1  193.58   10.80
   0   8   1  192.88   14.80
   0   8  -1  219.78   11.00
  -1  -8  -1  193.58   10.90
  -1   8  -1  199.68   12.30
   1   8   1  187.58   13.90
   1   8   1  188.58   10.20
  -1   8  -1  222.48   11.20
  -1   8  -1  231.88   13.00
  -2  -8  -1   76.39    7.60
  -2   8  -1   89.39   11.70
  -2   8  -1   69.99    8.40
   2   8   1   83.59   11.70
  -2   8  -1   60.79    8.30
   2   8   1   77.39    7.50
  -3  -8  -1  461.85   18.70
  -3   8  -1  467.65   21.20
   3   8   1  487.15   19.80
  -3   8  -1  472.65   22.10
   3   8   1  487.75   27.50
  -4  -8  -1  104.79    9.70
   4  -8   1   96.19   16.30
  -4   8  -1  104.59   11.70
   4   8   1  109.99   17.00
   4   8   1   92.69   10.40
  -4   8  -1   80.09   12.30
   5  -8   1   94.39   13.50
   5  -8   1  143.99   20.70
  -5  -8  -1  102.19   10.30
   5   8   1  120.79   19.40
   5   8   1  116.59   12.60
  -5   8  -1  106.29   12.40
   6  -8   1   91.09   19.70
   6  -8   1   88.99   13.80
   6   8   1   93.89   20.50
   6   8   1   77.59   11.90
  -6   8  -1   91.79   12.60
   7  -8   1   52.59   18.40
   7   8   1   40.40   17.90
   8  -8   1   61.39   21.60
   8   8   1   92.89   23.40
   9  -8   1   81.59   27.70
   9   8   1  170.88   32.50
   9  -9  -1   76.79   25.90
   9   9  -1   67.59   22.80
   8  -9  -1   75.89   16.70
   8  -9  -1   61.59   21.70
   8   9  -1   73.79   15.60
   8   9  -1   51.99   20.90
   7  -9  -1   62.79   14.40
   7   9  -1   46.90   12.60
   7   9  -1   57.69   19.90
   6  -9  -1  379.76   25.10
   6   9  -1  355.86   31.20
  -6   9   1  332.47   35.40
   6   9  -1  352.06   22.70
   5  -9  -1    0.90    7.40
  -5   9   1   24.10   14.70
   5   9  -1    0.20    6.90
   5   9  -1   21.30   12.40
   4  -9  -1  152.48   11.80
  -4  -9   1  165.88    8.80
   4   9  -1  172.08   15.00
  -4   9   1  164.48   17.30
   4   9  -1  166.08   20.40
  -4   9   1  172.98   22.30
   3  -9  -1  380.56   17.10
  -3  -9   1  327.57   13.20
   3   9  -1  315.17   22.30
   3   9  -1  353.06   18.00
  -3   9   1  341.97   24.80
  -3   9   1  351.56   20.70
  -2  -9   1  283.47   12.30
   2  -9  -1  292.17   14.80
  -2   9   1  298.47   16.60
   2   9  -1  283.67   17.70
  -2   9   1  294.47   21.20
   2   9  -1  293.47   15.20
   1  -9  -1  171.78   10.80
  -1  -9   1  168.28   10.10
   1   9  -1  160.88   10.80
  -1   9   1  189.58   12.10
  -1   9   1  178.38   17.10
   1   9  -1  155.58   10.20
   0  -9  -1  255.47   12.70
   0   9   1  226.58   11.80
   0   9   1  239.48   16.20
   0   9  -1  268.87   13.40
   0   9  -1  255.87   12.50
  -1  -9  -1  410.76   16.40
   1   9   1  384.26   20.10
  -1   9  -1  395.36   17.80
   1   9   1  391.86   15.90
  -1   9  -1  413.76   18.40
  -1   9  -1  369.46   16.10
  -2  -9  -1  295.77   13.50
  -2   9  -1  273.27   15.30
  -2   9  -1  246.88   14.40
  -2   9  -1  283.87   18.30
   2   9   1  255.87   13.00
   2   9   1  281.17   18.30
  -3  -9  -1  664.83   24.10
  -3   9  -1  691.13   27.40
   3   9   1  695.33   34.10
   3   9   1  682.33   25.50
  -3   9  -1  659.13   27.70
  -4  -9  -1  177.38   11.60
   4  -9   1  185.78   21.30
  -4   9  -1  205.18   17.80
   4   9   1  186.18   13.20
  -4   9  -1  142.19   13.80
   4   9   1  190.08   21.60
   5  -9   1  449.16   24.60
   5  -9   1  441.56   31.90
  -5  -9  -1  498.95   20.80
   5   9   1  460.35   22.40
   5   9   1  437.46   32.20
  -5   9  -1  481.65   23.90
   6  -9   1   25.60   13.80
   6  -9   1   24.80    9.70
  -6   9  -1   25.30    8.30
   6   9   1   36.80   16.00
   6   9   1   20.10    8.60
   7  -9   1  120.39   24.10
   7   9   1  141.79   25.60
   8  -9   1   95.39   24.10
   8   9   1  122.19   27.00
   9  -9   1   62.99   22.30
   9   9   1   47.40   22.80
   9 -10  -1    7.40   19.00
   9  10  -1   36.90   21.40
   8 -10  -1  238.88   34.20
   8 -10  -1  228.78   25.70
   8  10  -1  296.17   36.30
   7 -10  -1  284.77   26.20
   7  10  -1  267.17   33.70
   7  10  -1  263.27   21.30
   6  10  -1   67.69   12.70
   6  10  -1   85.19   20.20
   5  10  -1 1034.40   40.60
   5  10  -1  994.30   51.59
  -5  10   1 1118.69   54.49
  -4 -10   1  386.66   15.20
   4 -10  -1  409.06   19.60
   4  10  -1  394.86   27.30
  -4  10   1  432.56   30.30
   4  10  -1  407.16   21.10
  -4  10   1  412.86   24.70
   3 -10  -1  594.94   23.80
  -3 -10   1  589.04   20.00
   3  10  -1  566.04   24.80
  -3  10   1  611.34   32.80
   3  10  -1  618.54   30.90
  -3  10   1  568.84   26.80
   2 -10  -1 3210.48   89.09
  -2 -10   1 3174.38   85.99
   2  10  -1 3178.58   92.89
   2  10  -1 3101.19  109.69
  -2  10   1 3372.36  113.09
  -2  10   1 3242.68   94.79
  -1 -10   1  818.42   27.30
   1 -10  -1  849.81   28.70
  -1  10   1  846.22   30.20
   1  10  -1  851.21   31.10
   1  10  -1  817.92   28.80
  -1  10   1  857.31   36.60
   0 -10  -1  950.70   30.90
   0  10   1  917.01   37.40
   0  10   1  964.70   31.60
   0  10  -1  939.81   31.20
   0  10  -1  968.40   31.40
  -1 -10  -1 1332.77   40.70
  -1  10  -1 1368.66   47.60
   1  10   1 1307.57   49.90
   1  10   1 1328.57   41.50
  -1  10  -1 1402.26   42.60
  -1  10  -1 1325.47   42.20
  -2 -10  -1   55.39    7.10
   2  10   1   42.70    9.60
  -2  10  -1   45.60    8.20
   2  10   1   48.00    6.70
  -2  10  -1   48.70   10.30
  -2  10  -1   51.79    7.70
  -3 -10  -1 1678.03   50.09
   3  10   1 1628.54   52.39
  -3  10  -1 1715.53   53.59
   3  10   1 1732.63   66.69
  -3  10  -1 1727.83   55.59
   4 -10   1 1048.10   49.50
  -4 -10  -1 1074.99   35.20
  -4  10  -1 1107.39   39.20
   4  10   1 1039.40   49.60
  -4  10  -1 1093.59   41.90
   4  10   1 1048.90   37.30
  -5 -10  -1    4.00    5.20
   5 -10   1   14.20   12.00
  -5  10  -1    0.00    8.00
  -5  10  -1    7.00    6.70
   5  10   1   12.00    6.50
   5  10   1   12.60   12.40
   6 -10   1  317.17   33.50
   6 -10   1  327.77   22.90
   6  10   1  323.47   30.40
   6  10   1  322.27   20.20
  -6  10  -1  382.76   21.80
   7 -10   1   19.30   15.50
  -7  10  -1   82.29   12.80
   7  10   1   59.19   20.20
   8 -10   1   79.59   24.10
   8  10   1   99.79   25.30
   9 -11  -1   98.99   27.20
   9  11  -1  123.69   29.80
   8 -11  -1   25.10   13.30
   8 -11  -1   58.79   21.70
   8  11  -1   47.50   20.50
   7 -11  -1   30.30   12.50
   7 -11  -1   40.60   10.10
   7  11  -1   49.60   17.40
   7  11  -1   24.70   10.60
   6 -11  -1  811.82   38.80
   6 -11  -1  794.22   32.10
   6  11  -1  741.93   45.30
  -6  11   1  688.43   45.90
   6  11  -1  785.32   34.90
   5 -11  -1  563.24   26.00
   5  11  -1  632.84   28.90
  -5  11   1  638.94   33.60
  -5  11   1  566.74   38.30
   5  11  -1  599.94   37.00
  -4 -11   1  787.62   25.80
   4 -11  -1  784.22   30.60
  -4  11   1  880.31   44.00
  -4  11   1  820.12   36.60
   4  11  -1  808.22   40.70
   4  11  -1  794.52   32.40
   3 -11  -1  393.36   19.10
  -3 -11   1  391.46   15.70
  -3  11   1  398.96   22.40
   3  11  -1  404.26   19.90
   3  11  -1  421.06   24.70
  -3  11   1  375.16   26.50
  -2 -11   1 2237.88   61.69
   2 -11  -1 2192.08   64.39
   2  11  -1 2283.57   67.29
  -2  11   1 2045.10   80.59
  -2  11   1 2314.87   69.39
   2  11  -1 2186.38   78.09
  -1 -11   1 1038.20   33.20
   1 -11  -1 1058.69   34.50
  -1  11   1 1074.99   36.20
  -1  11   1  996.00   42.70
   1  11  -1 1090.79   35.30
   1  11  -1 1012.30   37.50
   0 -11  -1 1104.79   34.90
   0  11  -1 1085.19   35.40
   0  11   1 1077.99   35.50
   0  11   1 1040.00   42.00
  -1 -11  -1    8.20    4.70
  -1  11  -1    2.90    4.80
  -1  11  -1   10.50    4.50
  -1  11  -1    3.50    6.10
   1  11   1    4.70    3.80
   1  11   1   14.10    6.70
  -2 -11  -1  120.79   10.20
  -2  11  -1  133.59   12.00
  -2  11  -1  137.99   14.30
   2  11   1  134.09    9.90
  -2  11  -1  132.89   11.90
   2  11   1  113.39   13.70
  -3 -11  -1   13.20    4.90
   3  11   1   21.30    9.60
  -3  11  -1    2.60    5.90
  -3  11  -1   10.70    6.20
   3  11   1   15.20    5.60
  -3  11  -1   19.10   10.40
  -4 -11  -1  770.62   28.10
  -4  11  -1  783.52   31.90
   4  11   1  787.22   40.80
  -4  11  -1  798.52   34.40
   4  11   1  800.12   30.60
   5 -11   1  260.87   25.90
  -5 -11  -1  319.67   16.70
  -5  11  -1  284.17   19.20
  -5  11  -1  341.47   23.60
   5  11   1  324.17   18.80
   5  11   1  296.27   27.40
   6 -11   1    2.70    8.60
   6 -11   1   14.90   14.40
  -6  11  -1   33.60    9.40
   6  11   1    0.00    6.40
   6  11   1   23.00   14.90
   7 -11   1   90.49   22.80
  -7  11  -1  127.79   15.40
   7  11   1  135.69   25.20
   8 -11   1  224.98   33.80
   8  11   1  223.38   33.80
   9 -12  -1   39.00   23.10
   9  12  -1   51.79   22.60
   8 -12  -1   55.89   16.20
   8 -12  -1   35.80   20.90
   8  12  -1   15.80   18.60
   7 -12  -1    0.00    9.80
   7 -12  -1   12.70    8.60
  -7  12   1    3.40   17.30
   7  12  -1   23.20   10.00
   7  12  -1   13.90   14.40
   6 -12  -1   12.90    7.50
   6 -12  -1   20.70   10.60
  -6  12   1   32.40   17.20
   6  12  -1   36.80   15.80
   6  12  -1   17.40    8.70
   5 -12  -1  247.58   16.90
   5  12  -1  265.67   18.50
   5  12  -1  292.67   25.90
  -5  12   1  264.57   29.40
  -5  12   1  250.57   24.30
   4 -12  -1  153.48   13.90
  -4 -12   1  136.69    9.30
   4  12  -1  156.18   14.50
  -4  12   1  126.59   16.40
   4  12  -1  142.29   19.00
  -4  12   1  173.28   23.30
   3 -12  -1  278.37   16.20
  -3 -12   1  273.87   12.90
   3  12  -1  274.17   19.70
  -3  12   1  229.38   18.10
  -3  12   1  265.07   23.50
   3  12  -1  275.87   16.40
  -2 -12   1   18.40    5.10
   2 -12  -1   18.80    6.10
   2  12  -1    8.10    6.50
  -2  12   1   23.50    7.40
   2  12  -1   10.40    5.30
  -2  12   1   24.30   11.70
   1 -12  -1   27.20    6.30
  -1 -12   1   38.20    6.50
  -1  12   1   23.80   10.50
   1  12  -1   26.20    6.00
  -1  12   1   33.60    7.10
   1  12  -1   32.70    6.10
   0 -12   1    1.50    4.20
   0 -12  -1   11.50    5.10
   0  12   1    7.60    4.90
   0  12  -1    4.50    4.60
   0  12   1    8.00    8.10
  -1 -12  -1  216.58   12.70
   1  12   1  198.18   15.30
  -1  12  -1  210.48   13.10
  -1  12  -1  214.48   13.00
   1  12   1  190.28   12.00
  -1  12  -1  210.48   14.10
  -2 -12  -1  136.39   10.40
   2  12   1  119.89   13.80
  -2  12  -1  130.99   12.20
   2  12   1  126.59   10.70
  -2  12  -1  119.69   11.90
  -2  12  -1  134.19   14.10
  -3 -12  -1  289.17   15.10
  -3  12  -1  333.77   22.40
  -3  12  -1  308.97   18.60
  -3  12  -1  268.47   17.50
   3  12   1  295.87   15.70
   3  12   1  309.67   21.80
  -4 -12  -1  110.09   10.70
  -4  12  -1  107.59   13.00
   4  12   1  106.89   11.60
   4  12   1  116.29   18.10
  -4  12  -1  113.49   14.20
  -5 -12  -1   27.80    7.10
   5 -12   1   26.70   14.10
   5  12   1   36.30    8.50
   5  12   1   52.49   15.30
  -5  12  -1   40.40   11.60
  -5  12  -1   35.70    9.20
   6 -12   1    2.50    8.50
   6 -12   1    6.00   14.10
   6  12   1    0.00   13.30
  -6  12  -1    2.80    7.60
   6  12   1    0.00    7.20
   7 -12   1   62.19   20.20
   7  12   1   59.99   20.90
  -7  12  -1   51.39   11.50
   8 -12   1   21.40   17.80
   8  12   1   51.99   20.80
   9 -13  -1  229.88   37.30
   9  13  -1  224.28   35.40
   8 -13  -1  112.09   19.40
   8 -13  -1   96.09   25.20
   8  13  -1  114.69   25.80
   7 -13  -1   12.10   10.70
   7 -13  -1   31.80    9.90
  -7  13   1   40.70   19.40
   7  13  -1   16.10   10.20
   7  13  -1   12.00   15.70
   6 -13  -1   99.79   16.30
   6 -13  -1  105.59   13.00
   6  13  -1   73.49   19.50
  -6  13   1  116.39   23.60
   6  13  -1  116.69   14.70
   5 -13  -1   10.10    7.10
  -5  13   1   27.50   15.20
   5  13  -1   15.40   12.80
   5  13  -1   17.80    8.50
  -5  13   1   33.20   11.20
  -4 -13   1  124.79    9.30
   4 -13  -1  121.19   12.90
   4  13  -1  130.89   18.10
   4  13  -1  133.09   14.00
  -4  13   1  121.99   15.80
  -4  13   1  143.99   21.60
   3 -13  -1  778.22   30.20
  -3 -13   1  779.02   26.40
  -3  13   1  787.12   39.30
  -3  13   1  775.22   33.40
   3  13  -1  764.52   30.80
   3  13  -1  749.82   35.80
   2 -13  -1   94.39   10.30
  -2 -13   1   94.29    9.00
   2  13  -1  107.59   11.80
   2  13  -1   91.69   10.30
  -2  13   1  124.09   16.80
  -2  13   1   90.79   11.20
   1 -13  -1   40.80    7.40
  -1 -13   1   55.49    7.70
   1  13  -1   62.69    8.30
   1  13  -1   67.89    7.50
  -1  13   1   78.19   13.60
  -1  13   1   43.10    8.00
   0 -13  -1  151.38   12.40
   0 -13   1  156.28   12.70
   0  13  -1  151.18   11.50
   0  13   1  133.59   10.60
   0  13   1  169.58   15.50
  -1 -13  -1  131.49   11.00
   1  13   1  131.99   13.50
   1  13   1  128.49   10.30
  -1  13  -1  147.19   11.60
  -1  13  -1  138.89   11.60
  -1  13  -1  117.49   11.50
  -2 -13  -1 1171.28   38.00
   2  13   1 1149.78   47.20
   2  13   1 1140.09   38.80
  -2  13  -1 1188.38   45.80
  -2  13  -1 1190.38   41.10
  -2  13  -1 1149.48   40.40
  -3 -13  -1  257.27   14.80
  -3  13  -1  283.47   18.20
   3  13   1  276.07   20.90
   3  13   1  264.67   15.50
  -3  13  -1  302.07   21.70
  -3  13  -1  250.57   17.10
  -4 -13  -1   41.30    7.20
  -4  13  -1   45.30   10.70
  -4  13  -1   38.50    9.40
   4  13   1   40.40    8.20
   4  13   1   42.40   13.40
   5 -13   1    0.00   11.40
   5  13   1   21.50   13.10
  -5  13  -1    9.30    7.60
  -5  13  -1    0.00    8.90
   5  13   1    0.00    6.40
   6 -13   1   14.50   14.30
   6  13   1    2.00   12.60
  -6  13  -1   14.90    8.30
   6  13   1    8.30    7.70
   7 -13   1   68.89   19.10
   7  13   1   18.50   17.50
  -7  13  -1   60.59   12.20
   8 -13   1  177.28   30.70
   8  13   1  109.29   26.30
   8 -14  -1  268.97   28.10
   8 -14  -1  286.97   38.60
   8  14  -1  274.67   35.90
   7 -14  -1  272.77   27.20
   7 -14  -1  314.47   21.30
  -7  14   1  293.07   35.70
   7  14  -1  275.27   24.30
   7  14  -1  247.48   32.20
   6 -14  -1   15.30    7.80
   6  14  -1    9.40    8.20
  -6  14   1   45.10   17.60
   6  14  -1    3.10   14.00
   5 -14  -1  622.84   28.30
   5  14  -1  626.04   37.50
   5  14  -1  626.64   29.70
  -5  14   1  635.34   34.20
  -5  14   1  571.14   39.40
   4 -14  -1  483.15   23.90
  -4 -14   1  485.45   19.40
   4  14  -1  462.45   29.70
  -4  14   1  483.05   28.00
   4  14  -1  471.45   24.20
  -4  14   1  558.34   34.40
  -3 -14   1  387.46   17.10
   3 -14  -1  445.86   21.30
   3  14  -1  362.76   20.10
  -3  14   1  408.56   28.10
  -3  14   1  350.36   22.30
   3  14  -1  397.56   24.10
   2 -14  -1 1124.89   38.90
  -2 -14   1 1151.88   36.60
   2  14  -1 1181.28   44.00
  -2  14   1 1028.00   47.70
  -2  14   1 1113.39   41.10
   2  14  -1 1131.09   39.20
   1 -14  -1  178.98   13.00
  -1 -14   1  188.68   12.60
  -1  14   1  187.18   13.90
   1  14  -1  173.18   11.90
   1  14  -1  169.28   12.30
  -1  14   1  188.28   18.50
   0 -14   1  113.69   11.10
   0 -14  -1  133.39   12.00
   0  14   1  131.29   14.80
   0  14   1  115.49   11.00
   0  14  -1  119.99   11.10
  -1 -14  -1 1180.18   39.10
   1  14   1 1208.88   47.00
   1  14   1 1179.88   40.00
  -1  14  -1 1140.79   40.40
  -1  14  -1 1235.78   43.40
  -2 -14  -1    6.90    5.00
  -2  14  -1    0.00    4.90
   2  14   1   12.30    8.10
   2  14   1    0.80    4.70
  -2  14  -1    8.40    5.60
  -2  14  -1    0.00    8.00
  -3 -14  -1  875.81   31.60
   3  14   1  890.71   33.40
  -3  14  -1  907.11   36.40
  -3  14  -1  931.71   41.10
  -3  14  -1  942.71   35.60
   3  14   1  876.01   41.40
  -4 -14  -1  212.18   13.90
  -4  14  -1  236.88   17.70
  -4  14  -1  226.78   20.00
   4  14   1  205.48   23.00
   4  14   1  212.48   15.50
   5 -14   1    1.40   12.80
   5  14   1    0.70    6.50
   5  14   1    2.90   11.70
  -5  14  -1   11.10    7.90
  -5  14  -1   23.60   10.40
   6 -14   1  166.68   25.30
  -6  14  -1  207.78   22.60
   6  14   1  171.38   26.10
   6  14   1  206.78   18.60
  -6  14  -1  185.48   18.70
   7 -14   1  490.25   38.30
  -7  14  -1  482.85   27.90
   7  14   1  443.76   38.50
   8 -14   1   73.49   22.00
   8  14   1   81.19   24.20
   8 -15  -1    7.60   12.90
   8  15  -1   42.70   21.10
   7 -15  -1  375.46   29.00
   7 -15  -1  400.86   24.70
  -7  15   1  393.86   41.30
   7  15  -1  415.96   26.20
   7  15  -1  381.66   35.00
   6 -15  -1  572.54   28.50
   6  15  -1  517.25   37.70
  -6  15   1  605.64   36.50
   6  15  -1  615.04   30.40
  -6  15   1  608.74   42.30
   5 -15  -1  260.07   18.80
   5  15  -1  283.97   26.10
  -5  15   1  287.37   32.20
   5  15  -1  302.67   19.90
  -5  15   1  288.37   26.00
   4 -15  -1  177.98   16.30
  -4 -15   1  205.18   12.40
   4  15  -1  223.08   22.70
  -4  15   1  197.78   24.80
   4  15  -1  187.58   16.80
  -4  15   1  230.08   21.20
   3 -15  -1  702.93   29.70
  -3 -15   1  703.43   25.90
   3  15  -1  729.73   29.70
   3  15  -1  720.53   34.30
  -3  15   1  695.23   37.70
  -3  15   1  707.03   31.90
  -2 -15   1   88.29    9.70
   2 -15  -1  111.39   12.20
   2  15  -1   99.99   11.50
  -2  15   1  105.69   16.50
   2  15  -1  107.59   11.40
  -2  15   1   84.39   11.60
  -1 -15   1 1043.30   35.60
   1 -15  -1 1005.50   36.40
   1  15  -1 1066.89   37.10
   1  15  -1 1086.59   39.00
  -1  15   1  983.30   44.30
  -1  15   1 1059.59   38.30
   0 -15   1 1415.86   46.30
   0 -15  -1 1411.06   46.00
   0  15  -1 1454.75   47.10
   0  15   1 1440.26   55.29
   0  15   1 1385.46   46.80
  -1 -15  -1   14.40    5.70
   1 -15   1    4.00    5.80
  -1  15  -1   16.00    7.40
   1  15   1   16.40    8.00
   1  15   1   11.80    5.30
  -1  15  -1   15.80    6.00
  -2 -15  -1  500.95   21.90
  -2  15  -1  508.55   24.20
  -2  15  -1  512.45   25.40
  -2  15  -1  491.75   24.10
   2  15   1  504.75   27.10
   2  15   1  495.95   22.10
  -3 -15  -1    0.00    4.30
   3  15   1    0.00    7.60
  -3  15  -1    0.00    5.50
  -3  15  -1    0.00    5.80
   3  15   1    0.00    4.60
  -3  15  -1   15.30   10.50
  -4 -15  -1  427.86   19.90
  -4  15  -1  403.46   23.30
  -4  15  -1  398.36   24.70
   4  15   1  407.06   21.20
   4  15   1  411.76   28.90
   5 -15   1  378.36   30.50
   5  15   1  422.66   31.20
  -5  15  -1  401.46   24.00
   5  15   1  418.16   22.60
  -5  15  -1  400.66   26.90
   6 -15   1  284.77   32.20
   6  15   1  270.17   31.20
   6  15   1  293.17   19.80
  -6  15  -1  265.67   22.50
  -6  15  -1  294.07   27.00
   7 -15   1  222.18   30.50
   7  15   1  240.98   32.10
  -7  15  -1  167.48   19.50
   8 -15   1  391.26   41.70
   8  15   1  347.77   40.60
   8 -16  -1    4.90   13.60
   8  16  -1    2.30   17.70
   7 -16  -1    0.00    8.10
   7 -16  -1   11.60   11.80
  -7  16   1    0.00   18.10
   7  16  -1   27.90   17.10
   7  16  -1    7.40    9.20
   6 -16  -1    3.90    7.60
  -6  16   1   11.90   16.70
   6  16  -1    8.80    8.00
  -6  16   1    0.00    9.90
   6  16  -1   29.00   15.30
   5 -16  -1   57.09   11.00
   5  16  -1   67.99   11.90
   5  16  -1   40.90   14.70
  -5  16   1   62.29   19.20
  -5  16   1   43.90   13.00
  -4 -16   1   20.80    6.20
   4 -16  -1   14.10    7.50
  -4  16   1   16.50   15.00
  -4  16   1   32.40   10.30
   4  16  -1    6.50    7.00
   4  16  -1   21.60   11.40
  -3 -16   1  106.99   10.50
   3 -16  -1  123.89   13.30
   3  16  -1   91.79   11.70
  -3  16   1  121.29   15.00
  -3  16   1  108.59   18.60
   3  16  -1   79.59   13.20
  -2 -16   1   64.69    8.70
   2 -16  -1   87.69   11.20
  -2  16   1   79.69   16.20
   2  16  -1   83.29   10.90
  -2  16   1   71.79   11.30
   2  16  -1   83.19   10.50
  -1 -16   1   15.70    6.10
   1 -16  -1   23.20    6.90
   1  16  -1    8.50    5.50
  -1  16   1   18.70   11.60
   1  16  -1   17.40    6.30
  -1  16   1   12.00    6.40
   0 -16   1   23.70    7.00
   0 -16  -1   19.60    6.60
   0  16   1   20.00    6.80
   0  16  -1   21.70    6.40
   0  16   1   33.40   10.80
   1 -16   1    2.90    4.90
  -1 -16  -1    0.00    4.10
   1  16   1    0.00    7.60
  -1  16  -1    0.00    6.90
   1  16   1    0.00    4.30
  -1  16  -1    0.00    4.70
  -2 -16  -1   32.60    7.20
  -2  16  -1   22.20    7.60
   2  16   1   35.10   10.00
  -2  16  -1   29.50   10.50
   2  16   1   28.80    7.00
  -3 -16  -1   86.69   10.60
  -3  16  -1   90.29   12.70
  -3  16  -1  102.09   12.70
   3  16   1   90.19   11.00
  -3  16  -1   90.39   15.40
   3  16   1   72.29   13.80
  -4 -16  -1   92.39   10.60
   4  16   1   93.09   11.90
  -4  16  -1   85.59   13.60
  -4  16  -1   98.69   13.70
   4  16   1   88.09   17.00
   5 -16   1   42.10   15.60
   5  16   1   51.99   10.10
  -5  16  -1   50.49   12.80
   5  16   1   28.30   13.70
  -5  16  -1   49.70   11.10
   6 -16   1    0.00   15.10
   6  16   1   14.70   14.50
  -6  16  -1    0.00   11.10
   6  16   1   10.30    8.20
  -6  16  -1    1.00    8.20
   7 -16   1    5.30   16.50
  -7  16  -1    0.00    9.00
   7  16   1   15.00   17.10
   8  16   1   89.39   24.20
   8 -17  -1   23.70   14.70
   8  17  -1   23.60   19.50
   7 -17  -1   30.40   13.30
   7 -17  -1   30.20   10.90
  -7  17   1   23.10   19.90
   7  17  -1    4.90   10.00
   7  17  -1   12.70   17.20
   6 -17  -1    4.80    8.30
   6  17  -1   13.00   14.60
  -6  17   1   20.00   12.80
   6  17  -1    0.00    7.40
  -6  17   1    0.00   15.90
   5 -17  -1   66.79   11.70
   5  17  -1   84.89   17.50
  -5  17   1   91.49   17.20
   5  17  -1   91.49   13.30
  -5  17   1   65.19   19.50
  -4 -17   1  383.16   18.50
   4 -17  -1  424.26   23.30
  -4  17   1  377.46   25.50
  -4  17   1  435.96   32.20
   4  17  -1  373.96   27.10
   4  17  -1  374.56   21.90
  -3 -17   1  128.29   11.70
   3 -17  -1  105.59   12.90
   3  17  -1  120.19   13.20
  -3  17   1  138.99   20.30
  -3  17   1  136.29   15.80
   3  17  -1  127.39   15.40
   2 -17  -1    9.60    6.70
  -2 -17   1    6.40    5.70
   2  17  -1   21.50    7.60
   2  17  -1   20.10    6.50
  -2  17   1    2.10   12.40
  -2  17   1   15.70    7.50
  -1 -17   1    0.60    5.40
   1 -17  -1    2.20    5.50
  -1  17   1    4.90   11.30
  -1  17   1    9.30    6.00
   1  17  -1    1.00    6.10
   1  17  -1    0.00    4.60
   0 -17  -1   68.19   10.00
   0 -17   1   70.09   10.30
   0  17   1   69.59   13.60
   0  17   1   71.09    9.90
   0  17  -1   71.29   10.10
   1 -17   1    6.90    6.30
  -1 -17  -1   16.10    6.80
   1  17   1    9.50    6.30
  -1  17  -1   21.80    8.30
   1  17   1    5.50    8.90
  -1  17  -1   28.30    7.60
  -2 -17  -1  605.74   25.40
   2  17   1  574.44   30.00
  -2  17  -1  627.74   28.90
   2  17   1  577.84   25.40
  -2  17  -1  527.75   26.30
  -3 -17  -1   43.60    8.10
  -3  17  -1   29.50    8.90
  -3  17  -1   63.49   11.40
   3  17   1   51.99   12.60
  -3  17  -1   40.30   12.90
   3  17   1   41.70    8.40
  -4 -17  -1    1.70    5.40
   4  17   1    0.00   10.50
  -4  17  -1   12.80    8.30
   4  17   1   22.00    7.40
  -4  17  -1    0.00    7.70
   5 -17   1   17.20   14.40
  -5  17  -1    0.00    7.70
  -5  17  -1    0.00    9.80
   5  17   1    0.00   11.00
   5  17   1    5.50    7.50
   6 -17   1   13.50   16.60
   6  17   1    7.10   15.10
   6  17   1   12.50    8.60
  -6  17  -1   11.00   12.30
  -6  17  -1   10.00    9.10
   7  17   1   89.29   23.20
  -7  17  -1   92.59   15.90
   8  17   1  163.08   30.10
   8 -18  -1  261.27   29.50
   8  18  -1  228.58   33.40
   7 -18  -1  125.79   16.90
  -7  18   1  102.99   25.90
   7  18  -1   79.19   22.80
   7  18  -1   93.59   15.90
   6 -18  -1   36.60   10.40
   6  18  -1   52.89   11.70
   6  18  -1   63.19   18.30
  -6  18   1   36.20   13.80
  -6  18   1   56.59   21.00
   5 -18  -1  515.55   27.60
  -5  18   1  520.35   38.50
   5  18  -1  532.35   34.70
  -5  18   1  569.14   32.90
   5  18  -1  534.25   27.90
   4 -18  -1  602.04   29.50
  -4 -18   1  626.34   25.60
  -4  18   1  636.94   39.30
   4  18  -1  620.84   35.10
   4  18  -1  655.33   30.20
  -4  18   1  650.23   33.40
   3 -18  -1  285.07   19.10
  -3 -18   1  306.47   16.90
  -3  18   1  306.17   21.70
  -3  18   1  296.97   26.20
   3  18  -1  271.07   18.50
   3  18  -1  295.27   20.90
  -2 -18   1  541.55   23.70
   2 -18  -1  522.85   25.40
   2  18  -1  564.34   26.10
   2  18  -1  528.15   24.80
  -2  18   1  498.75   32.40
  -2  18   1  546.55   27.10
  -1 -18   1  201.98   14.50
   1 -18  -1  181.78   16.00
   1  18  -1  169.48   14.70
   1  18  -1  183.98   14.40
  -1  18   1  180.78   16.70
  -1  18   1  172.18   20.40
   0 -18  -1  138.89   13.80
   0 -18   1  135.69   14.00
   0  18   1  192.88   18.60
   0  18   1  151.78   14.10
   0  18  -1  150.08   14.20
   1 -18   1  776.82   31.80
  -1 -18  -1  780.42   30.30
   1  18   1  768.12   35.50
   1  18   1  712.03   29.80
  -1  18  -1  737.23   30.50
  -1  18  -1  684.13   30.20
  -2 -18  -1   64.39   10.10
   2 -18   1   75.09   11.70
  -2  18  -1   53.09   10.60
   2  18   1   55.89    9.40
   2  18   1   83.99   13.50
  -2  18  -1   65.09   12.50
  -3 -18  -1  426.16   20.70
  -3  18  -1  406.46   26.00
   3  18   1  386.46   20.90
  -3  18  -1  369.76   23.00
   3  18   1  361.76   26.10
  -4 -18  -1  240.48   16.20
   4  18   1  233.28   22.90
   4  18   1  238.08   17.20
  -4  18  -1  285.87   21.80
  -4  18  -1  239.78   20.70
  -5  18  -1   19.10    9.90
  -5  18  -1   28.90   11.70
   5  18   1    8.70   12.20
   5  18   1    2.30    7.40
  -6  18  -1  300.07   28.80
  -6  18  -1  264.17   23.90
   6  18   1  280.87   32.20
   6  18   1  270.77   20.30
   7  18   1  512.55   41.00
   8 -19  -1   88.79   20.90
   8  19  -1  107.59   26.40
   7 -19  -1  225.38   22.10
  -7  19   1  267.67   30.60
   7  19  -1  204.48   22.50
   7  19  -1  233.18   32.00
   6 -19  -1  486.55   28.30
  -6  19   1  515.05   40.10
   6  19  -1  550.74   29.80
   6  19  -1  486.75   36.80
  -6  19   1  555.54   35.90
   5 -19  -1   45.00   11.20
  -5  19   1   50.59   13.70
  -5  19   1   51.19   20.20
   5  19  -1   51.39   11.60
   5  19  -1   63.69   16.20
   4 -19  -1   55.19   11.10
  -4 -19   1   74.69   10.00
   4  19  -1   50.99   13.10
  -4  19   1   53.29   12.60
  -4  19   1   93.49   20.00
   4  19  -1   67.79   11.70
  -3 -19   1  405.56   20.30
   3 -19  -1  366.76   22.30
   3  19  -1  419.26   24.90
  -3  19   1  361.16   23.80
  -3  19   1  443.36   30.20
   3  19  -1  395.36   22.30
  -2 -19   1    5.90    5.90
   2 -19  -1    9.50    7.10
  -2  19   1    4.70   12.50
  -2  19   1    0.00    5.90
   2  19  -1    4.30    7.50
   2  19  -1    0.00    5.10
   1 -19  -1  997.30   38.50
  -1 -19   1 1051.79   37.90
   1  19  -1 1018.20   38.50
  -1  19   1 1038.20   40.50
   1  19  -1 1010.20   40.10
  -1  19   1 1024.00   46.20
   0 -19   1  960.90   36.50
   0 -19  -1  919.51   36.00
   0  19  -1  984.30   37.30
   0  19   1  935.61   43.20
   0  19   1  934.41   36.90
   1 -19   1   23.00    8.20
  -1 -19  -1   20.90    7.50
   1  19   1   20.80    7.60
   1  19   1   28.50   11.30
  -1  19  -1   27.40    8.00
   2 -19   1  642.94   29.40
  -2 -19  -1  579.34   26.20
   2  19   1  583.04   26.70
   2  19   1  582.64   31.40
  -2  19  -1  608.64   29.20
  -3 -19  -1   68.09   10.10
   3 -19   1   79.49   13.00
   3  19   1   69.69   14.50
  -3  19  -1   76.79   13.50
   3  19   1   50.29    9.80
  -4 -19  -1  127.89   13.50
   4  19   1  127.99   14.40
  -4  19  -1   80.19   14.90
   4  19   1  123.99   18.50
  -5  19  -1  465.75   30.40
   5  19   1  498.85   26.10
   5  19   1  436.26   33.10
   6  19   1  119.29   15.70
   6  19   1  100.99   22.00
  -6  19  -1   83.19   18.90
   7  19   1   74.39   22.20
   7 -20  -1   83.29   15.30
  -7  20   1   71.99   18.90
   7  20  -1   97.39   23.00
   7  20  -1   61.89   15.00
   6 -20  -1   57.09   12.30
   6  20  -1   75.99   13.80
   6  20  -1   77.29   19.60
  -6  20   1   79.59   18.90
   5 -20  -1   60.39   12.40
   5  20  -1   54.09   16.00
  -5  20   1   72.89   15.30
   5  20  -1   74.29   13.20
  -4 -20   1    2.00    6.00
   4 -20  -1    6.20    7.90
   4  20  -1    6.70   10.50
   4  20  -1    0.00    7.20
  -4  20   1   21.30   10.70
   3 -20  -1    9.70    7.70
  -3 -20   1    3.00    6.40
   3  20  -1    1.60    6.40
  -3  20   1   22.30   15.20
  -3  20   1   25.90    9.80
   3  20  -1    7.00    9.00
  -2 -20   1  227.28   16.10
   2 -20  -1  249.48   18.00
   2  20  -1  241.28   16.50
  -2  20   1  208.68   19.40
  -2  20   1  236.48   25.20
   2  20  -1  236.28   17.40
  -1 -20   1   55.79   10.00
   1 -20  -1   59.69   10.30
   1  20  -1   74.99   11.10
  -1  20   1   71.49   16.50
  -1  20   1   58.19   11.10
   0 -20   1   57.29   10.10
   0 -20  -1   38.90    9.20
   0  20   1   57.79   10.50
   0  20   1   47.20   13.70
   0  20  -1   58.19   10.10
  -1 -20  -1   15.60    7.30
   1 -20   1    6.70    7.00
   1  20   1   12.70    7.40
   1  20   1    7.90   10.50
  -1  20  -1    6.20    6.80
   2 -20   1   20.50    8.50
  -2 -20  -1   32.50    8.50
   2  20   1   15.20    7.60
  -2  20  -1   20.90    9.10
   2  20   1   25.10   11.00
  -3 -20  -1   69.29   10.70
   3 -20   1   63.59   12.10
  -3  20  -1   69.39   12.40
   3  20   1   52.89   10.40
   3  20   1   58.49   14.00
  -4 -20  -1  125.99   14.00
  -4  20  -1  134.69   18.00
   4  20   1  161.38   16.30
   4  20   1  144.19   20.50
   5  20   1   32.60   10.30
   5  20   1   30.10   15.40
  -5  20  -1   20.60   11.50
   6  20   1   19.20   10.00
   6  20   1    3.40   13.10
  -6  20  -1   10.70   12.70
   7 -20   1   51.89   13.60
   7  20   1   35.70   19.20
   7 -21  -1   37.20   12.70
   7  21  -1   53.89   20.50
   7  21  -1   56.59   13.90
  -7  21   1   56.19   18.00
   6 -21  -1   27.70   11.00
   6  21  -1   21.50   15.70
   6  21  -1    4.40    9.70
  -6  21   1   16.00   14.30
   5 -21  -1   56.59   12.50
  -5  21   1   74.19   16.20
   5  21  -1   68.89   17.50
   5  21  -1   75.69   13.30
   4 -21  -1  362.06   22.90
  -4  21   1  273.17   26.10
   4  21  -1  322.07   25.20
   4  21  -1  349.77   22.20
   3 -21  -1  154.18   16.50
  -3 -21   1  169.08   15.40
   3  21  -1  158.18   16.60
  -3  21   1  138.59   17.40
  -2 -21   1   42.20    9.40
   2 -21  -1   38.90    9.80
  -2  21   1   38.10   10.10
   2  21  -1   34.90    9.40
  -1 -21   1   89.69   12.00
   1 -21  -1   67.29   11.60
  -1  21   1   73.29   17.70
  -1  21   1   98.39   13.20
   1  21  -1  105.39   12.80
   0 -21   1   29.90    8.70
   0 -21  -1   11.60    7.50
   0  21   1   13.20    7.70
   0  21   1   14.90   13.20
   0  21  -1   16.70    7.90
   1 -21   1   37.50   10.10
  -1 -21  -1   42.40    9.60
   1  21   1   39.50   12.60
   1  21   1   52.19    9.90
  -1  21  -1   62.59   11.10
   2 -21   1  687.73   32.00
  -2 -21  -1  615.84   28.80
  -2  21  -1  637.64   31.70
   2  21   1  700.63   30.50
   2  21   1  652.23   34.70
   3 -21   1   36.20   10.40
  -3 -21  -1   15.90    7.70
   3  21   1   32.40    9.10
  -3  21  -1   36.00   11.20
   3  21   1   40.90   12.70
  -4 -21  -1    8.30    7.40
   4 -21   1    3.30    8.40
   4  21   1    5.00   11.90
  -4  21  -1    0.00    9.10
   4  21   1    6.10    6.70
   5 -21   1    0.00    7.80
   5  21   1    2.50    7.20
  -5  21  -1    0.00    9.90
   5  21   1   15.60   13.70
   6 -21   1   12.20    9.90
  -6  21  -1    5.80   12.50
   6  21   1    3.80    9.00
   6  21   1    0.00   13.80
   7 -21   1   18.50   10.60
   7  21   1    4.70   17.40
   7 -22  -1  184.78   21.70
  -7  22   1  142.49   25.60
   7  22  -1  230.18   23.60
   6 -22  -1    5.20    9.50
   6  22  -1    0.00    9.60
  -6  22   1    0.00   12.40
   5 -22  -1  296.87   22.70
  -5  22   1  307.17   29.30
   5  22  -1  345.47   22.70
   4 -22  -1  262.87   22.70
  -4  22   1  188.88   21.50
   4  22  -1  238.18   18.90
   3 -22  -1  351.56   22.70
  -3 -22   1  362.26   20.30
  -3  22   1  313.37   23.20
   3  22  -1  324.57   21.40
  -2 -22   1  614.14   27.90
   2 -22  -1  586.04   29.40
  -2  22   1  632.04   31.50
   2  22  -1  576.54   28.20
  -1 -22   1  128.39   14.50
   1 -22  -1  112.79   14.40
   1  22  -1  120.59   14.40
  -1  22   1  116.39   15.20
   0 -22   1  475.75   25.40
   0 -22  -1  455.65   24.90
   0  22  -1  499.65   25.90
   0  22   1  506.55   26.10
  -1 -22  -1  702.83   31.40
   1 -22   1  734.73   33.10
  -1  22  -1  696.03   32.10
   1  22   1  709.13   31.90
   2 -22   1  105.09   14.90
  -2 -22  -1   69.19   11.90
   2  22   1   80.59   14.30
  -2  22  -1  102.89   14.00
   2  22   1   85.89   13.00
   3 -22   1  263.77   23.10
  -3 -22  -1  294.37   19.30
   3  22   1  308.07   24.10
   3  22   1  284.97   19.30
  -3  22  -1  287.17   22.20
  -4 -22  -1  143.99   15.40
   4 -22   1  134.59   17.40
   4  22   1  123.69   15.20
  -4  22  -1  147.79   19.10
   4  22   1  154.18   21.30
   5 -22   1   82.29   14.30
   5  22   1   37.10   11.00
  -5  22  -1   37.00   13.10
   5  22   1   39.40   16.10
   6 -22   1  226.38   23.80
  -6  22  -1  246.18   28.50
   6  22   1  255.77   31.40
   6  22   1  246.28   22.40
   7 -22   1   84.39   17.20
   7  22   1  126.49   26.40
   7 -23  -1  114.89   17.80
   7  23  -1  203.38   22.30
  -7  23   1  189.78   28.60
   6 -23  -1  276.47   25.00
   6  23  -1  308.77   23.60
  -6  23   1  301.37   31.60
   5 -23  -1   20.80    9.50
   5  23  -1   22.30   10.10
  -5  23   1   15.40   12.80
   4 -23  -1  343.87   24.00
   4  23  -1  373.16   23.20
  -4  23   1  356.26   27.30
   3 -23  -1  430.06   26.00
  -3 -23   1  494.85   24.90
   3  23  -1  519.95   26.50
  -3  23   1  457.35   29.30
  -2 -23   1   40.90    9.80
   2 -23  -1   51.09   11.10
  -2  23   1   40.80   11.20
   2  23  -1   34.80    9.80
  -1 -23   1  758.02   32.70
   1 -23  -1  708.83   32.90
   1  23  -1  719.43   33.10
  -1  23   1  774.22   35.50
   0 -23  -1  122.89   14.10
   0 -23   1   89.89   12.50
   0  23   1  114.69   14.60
   0  23  -1   98.39   13.60
   1 -23   1  113.09   15.10
  -1 -23  -1  101.99   13.40
  -1  23  -1  104.29   14.00
   1  23   1   89.99   13.60
   2 -23   1  236.48   21.70
  -2 -23  -1  241.88   18.10
   2  23   1  257.17   18.70
  -2  23  -1  270.57   20.40
   3 -23   1  294.87   25.10
  -3 -23  -1  307.47   20.40
  -3  23  -1  284.77   22.90
   3  23   1  295.97   20.10
   4 -23   1  152.98   18.80
  -4 -23  -1  187.58   17.80
   4  23   1  182.78   23.20
  -4  23  -1  180.68   21.30
   4  23   1  193.68   18.90
   5 -23   1  615.14   34.20
   5  23   1  677.33   32.60
  -5  23  -1  610.84   36.90
   5  23   1  658.13   40.80
   6 -23   1    0.00   10.00
   6  23   1   14.60   10.30
  -6  23  -1   12.20   14.00
   6  23   1   19.50   15.90
   7  24  -1  108.79   17.60
  -7  24   1   54.79   19.80
   6 -24  -1   79.69   15.90
   6  24  -1  103.19   16.60
  -6  24   1   68.79   19.20
   5 -24  -1   85.69   15.00
   5  24  -1   59.49   12.60
  -5  24   1   35.60   14.90
   4 -24  -1    8.00    9.00
  -4  24   1   12.30    9.70
   4  24  -1    4.80    8.70
   3 -24  -1   49.70   11.80
  -3 -24   1   45.10   10.10
   3  24  -1   47.70   11.30
  -3  24   1   38.80   12.60
   2 -24  -1  344.37   22.90
  -2 -24   1  324.97   21.20
  -2  24   1  364.36   24.50
   2  24  -1  354.96   21.80
  -1 -24   1  119.89   14.90
   1 -24  -1   88.59   13.40
   1  24  -1  105.79   14.20
  -1  24   1  108.89   15.10
   0 -24  -1   49.60   10.90
   0 -24   1   75.29   12.20
   0  24   1   59.79   11.80
   0  24  -1   73.79   12.10
  -1 -24  -1    4.80    7.50
   1 -24   1   10.00    7.80
   1  24   1    6.30    7.50
  -1  24  -1   23.50    9.00
   2 -24   1    4.60    8.40
  -2 -24  -1    6.90    7.80
  -2  24  -1    7.70    8.40
   2  24   1    0.00    6.70
   3 -24   1   34.20   10.90
  -3 -24  -1   37.80   10.40
  -3  24  -1   39.90   12.00
   3  24   1   19.00    9.60
   4 -24   1  289.47   26.10
  -4  24  -1  334.77   26.20
   4  24   1  330.17   22.30
   5 -24   1    0.00    8.60
   5  24   1    0.00    8.30
  -5  24  -1    7.50   12.30
   6 -24   1   89.09   16.40
  -6  24  -1  132.49   24.00
   6  24   1  147.49   18.80
   6 -25  -1    0.00    9.80
   6  25  -1    0.90    9.80
  -6  25   1    0.00   13.80
   5 -25  -1    6.50    9.80
   5  25  -1   19.30   10.20
  -5  25   1   11.10   12.60
   4 -25  -1  236.58   23.50
   4  25  -1  211.18   20.30
  -4  25   1  227.48   25.00
  -3 -25   1  265.97   19.30
   3 -25  -1  252.47   22.60
   3  25  -1  276.27   20.70
  -3  25   1  265.87   25.80
  -2 -25   1    5.00    7.30
   2 -25  -1   25.90    9.80
  -2  25   1    6.90    9.20
   2  25  -1    0.40    7.50
  -1 -25   1    3.10    7.40
   1 -25  -1    6.80    8.20
   1  25  -1    0.00    7.10
  -1  25   1    0.00    8.00
   0 -25   1   12.90    8.60
   0 -25  -1    0.00    7.40
   0  25  -1   15.80    8.70
   0  25   1   13.60    8.10
  -1 -25  -1  146.69   17.10
   1 -25   1  141.09   17.10
  -1  25  -1  121.69   16.30
   1  25   1  152.48   17.40
  -2 -25  -1  362.56   23.00
   2 -25   1  347.27   24.00
   2  25   1  353.26   22.40
  -2  25  -1  341.57   24.80
  -3 -25  -1   61.89   12.20
   3 -25   1   71.39   13.70
   3  25   1   70.59   12.70
  -3  25  -1   56.89   13.80
   4 -25   1   31.20   12.00
  -4  25  -1    0.00    9.20
   4  25   1    7.00    8.40
   5 -25   1    7.50   10.50
   5  25   1    0.00    8.90
  -5  25  -1   14.90   12.60
   6 -25   1    0.00    7.90
   6  25   1    0.00    9.50
  -6  25  -1    0.00   12.80
   6 -26  -1   60.19   15.40
  -6  26   1   79.79   20.40
   6  26  -1   68.49   15.20
   5 -26  -1  261.37   24.50
   5  26  -1  222.98   22.70
  -5  26   1  213.78   26.50
   4 -26  -1  125.79   17.10
   4  26  -1  132.59   17.20
  -4  26   1  144.69   21.20
   3 -26  -1    0.00    8.90
  -3 -26   1    1.90    7.80
   3  26  -1   11.80    7.40
  -3  26   1   18.80   10.40
   2 -26  -1  384.96   25.20
  -2 -26   1  419.76   24.80
  -2  26   1  419.16   27.60
   2  26  -1  410.06   25.20
  -1 -26   1   13.50    8.70
   1 -26  -1   18.60    8.80
  -1  26   1    0.00    8.80
   1  26  -1    6.20    8.30
   0 -26  -1  112.79   15.40
   0 -26   1  144.49   17.20
   0  26  -1  109.89   15.40
   0  26   1  139.19   17.20
   1 -26   1  249.28   22.30
  -1 -26  -1  232.08   20.40
  -1  26  -1  236.98   22.50
   1  26   1  219.78   20.80
   2 -26   1    5.00    8.40
  -2 -26  -1    2.70    8.20
   2  26   1    1.10    7.70
  -2  26  -1    0.00    8.20
  -3 -26  -1  305.17   22.00
   3 -26   1  262.87   24.10
  -3  26  -1  258.87   25.40
   3  26   1  307.37   22.00
   4 -26   1  207.28   23.20
   4  26   1  196.58   20.60
  -4  26  -1  223.78   24.70
   5 -26   1  115.09   18.60
   5  26   1   58.89   14.10
  -5  26  -1  101.89   19.80
   6 -26   1  269.47   27.00
  -6  26  -1  257.27   31.20
   6  26   1  293.57   26.40
   6 -27  -1  126.59   19.60
   6  27  -1  163.78   21.20
  -6  27   1  153.78   26.10
   5 -27  -1   22.00   11.70
   5  27  -1   20.60   10.70
  -5  27   1   46.20   16.10
   4 -27  -1  151.88   20.00
  -4  27   1  172.58   22.60
   4  27  -1  183.18   20.50
  -3 -27   1  460.35   26.90
   3 -27  -1  510.35   29.60
  -3  27   1  472.55   32.00
   3  27  -1  496.45   28.80
  -2 -27   1   56.59   11.50
   2 -27  -1   68.59   13.80
   2  27  -1   71.89   13.40
  -2  27   1   64.19   14.00
  -1 -27   1  910.91   38.50
   1 -27  -1  766.42   37.50
  -1  27   1  856.11   40.10
   1  27  -1  795.22   37.90
   0 -27   1  134.99   16.50
   0 -27  -1  127.19   16.70
   0  27  -1  154.28   18.30
   0  27   1  111.99   16.30
  -1 -27  -1    9.50    8.90
   1 -27   1    9.50    9.40
   1  27   1   22.40    9.70
  -1  27  -1   20.10   10.80
  -2 -27  -1  139.89   17.10
   2 -27   1  123.59   17.20
   2  27   1  133.69   17.40
  -2  27  -1  127.49   18.60
   3 -27   1  283.87   25.20
  -3 -27  -1  315.77   23.00
   3  27   1  354.46   23.80
  -3  27  -1  338.77   26.90
   4 -27   1   34.20   12.80
  -4  27  -1   46.40   14.60
   4  27   1   53.09   13.20
   5 -27   1  483.45   31.90
  -5  27  -1  451.25   34.50
   5  27   1  516.45   30.50
   5 -28  -1   79.19   15.90
  -5  28   1   59.39   17.40
   5  28  -1   46.60   12.90
   4 -28  -1   35.50   12.50
   4  28  -1   50.59   12.70
  -4  28   1   20.90   14.60
  -3 -28   1    0.00    8.20
   3 -28  -1    0.00    7.80
  -3  28   1    9.10   11.00
   3  28  -1    0.00    7.60
   2 -28  -1  159.98   19.00
  -2 -28   1  179.88   19.20
  -2  28   1  198.48   22.30
   2  28  -1  159.28   19.20
   1 -28  -1   17.30    9.70
  -1 -28   1   25.60   10.60
  -1  28   1   29.60   12.10
   1  28  -1   15.60   10.10
   0 -28  -1   91.69   15.10
   0 -28   1   51.59   12.80
   0  28   1   83.99   14.90
   0  28  -1   66.79   13.80
   1 -28   1   54.89   12.30
  -1 -28  -1   63.99   12.70
  -1  28  -1   27.70   12.00
   1  28   1   45.20   11.80
   2 -28   1  126.29   17.50
  -2 -28  -1  112.19   16.10
  -2  28  -1  102.89   17.90
   2  28   1   85.89   15.50
  -3 -28  -1  147.29   18.40
   3 -28   1  181.58   20.80
   3  28   1  192.88   20.80
  -3  28  -1  176.18   22.80
   4 -28   1  204.28   24.20
  -4  28  -1  212.38   25.80
   4  28   1  229.38   23.10
   5 -28   1    7.50   11.90
   5  28   1    0.00    9.30
  -5  28  -1   21.60   15.00
   5 -29  -1   37.90   14.70
   5  29  -1   40.10   13.80
  -5  29   1   18.30   16.00
   4 -29  -1  142.29   20.00
  -4  29   1  104.99   20.50
   4  29  -1  110.09   17.90
   3 -29  -1  111.99   17.40
  -3 -29   1  105.29   16.10
  -3  29   1  133.19   20.20
   3  29  -1   91.69   15.90
   2 -29  -1  155.98   19.50
  -2 -29   1  154.78   17.90
  -2  29   1  169.88   21.60
   2  29  -1  150.48   19.30
  -1 -29   1    3.40    8.50
   1 -29  -1    7.10    9.60
  -1  29   1    9.70   10.40
   1  29  -1   19.00    9.80
   0 -29  -1    9.10    9.10
   0 -29   1    7.30    9.20
   0  29  -1   11.70    9.60
   0  29   1   11.40   10.10
  -1 -29  -1  171.58   19.30
   1 -29   1  165.68   20.10
  -1  29  -1  144.49   20.00
   1  29   1  177.08   20.60
   2 -29   1   34.50   12.80
  -2 -29  -1   49.30   12.60
  -2  29  -1   27.90   12.40
   2  29   1   37.30   11.60
  -3 -29  -1  107.99   17.00
   3 -29   1  111.59   17.90
   3  29   1  121.49   18.20
  -3  29  -1  117.89   19.70
   4 -29   1    0.00   10.20
  -4  29  -1    0.00   12.40
   4  29   1    3.00   10.50
   4 -30  -1   15.40   11.80
   4  30  -1   11.10    9.80
  -4  30   1   20.50   14.80
  -3 -30   1    2.70    9.80
   3 -30  -1   10.30   10.90
   3  30  -1    0.00    8.70
  -3  30   1   16.40   13.30
   2 -30  -1  158.08   20.00
  -2 -30   1  235.38   22.80
   2  30  -1  189.18   21.60
  -2  30   1  201.38   23.10
  -1 -30   1   42.60   13.00
   1 -30  -1   23.80   10.00
   1  30  -1   14.50   10.60
  -1  30   1   32.30   11.80
   0 -30   1  264.07   23.90
   0 -30  -1  239.08   23.80
   0  30  -1  272.97   26.00
   0  30   1  269.47   26.10
  -1 -30  -1  130.49   18.30
   1 -30   1  160.68   20.20
  -1  30  -1  154.28   20.40
   1  30   1  132.09   18.50
   2 -30   1   70.29   15.90
  -2 -30  -1   54.39   13.60
   2  30   1   44.70   13.80
  -2  30  -1   30.60   14.00
  -3 -30  -1   12.60   10.90
   3 -30   1   15.80   11.60
  -3  30  -1   10.80   12.50
   3  30   1   28.30   11.90
   4 -30   1  156.48   21.90
   4  30   1  146.19   19.90
  -4  30  -1  168.48   24.60
   4 -31  -1   19.10   12.60
   4  31  -1   32.90   12.60
  -4  31   1   34.20   15.90
   3 -31  -1  358.06   27.00
  -3  31   1  293.97   29.80
   3  31  -1  335.57   26.00
   2 -31  -1   49.40   13.80
  -2 -31   1  104.29   16.50
  -2  31   1  117.89   19.00
   2  31  -1   57.69   15.10
  -1 -31   1  422.76   27.90
   1 -31  -1  403.66   28.30
  -1  31   1  414.56   29.60
   1  31  -1  438.16   28.30
   0 -31  -1  126.39   18.60
   0 -31   1  134.39   18.90
   0  31  -1  133.89   18.80
   0  31   1  122.59   19.60
  -1 -31  -1  171.68   20.50
   1 -31   1  152.48   20.70
  -1  31  -1  183.58   22.80
   1  31   1  158.18   20.90
   2 -31   1  236.28   24.90
  -2 -31  -1  219.78   22.80
   2  31   1  223.38   24.10
  -2  31  -1  239.18   26.50
   3 -31   1  213.88   24.10
  -3 -31  -1  227.48   23.60
  -3  31  -1  242.78   27.70
   3  31   1  222.68   24.40
   3 -32  -1   26.90   12.90
   3  32  -1   45.90   14.50
  -3  32   1   54.99   16.20
   2 -32  -1  128.89   19.40
  -2 -32   1  132.69   19.10
  -2  32   1   92.89   18.70
   2  32  -1  154.48   21.20
   1 -32  -1   30.20   12.20
  -1 -32   1   44.80   12.80
   1  32  -1   23.10   12.70
  -1  32   1   16.60   13.00
   0 -32  -1  113.39   18.70
   0 -32   1   75.49   15.70
   0  32   1  101.19   18.00
   0  32  -1  100.69   18.20
  -1 -32  -1  138.69   19.50
   1 -32   1  101.69   17.60
   1  32   1  164.58   21.30
  -1  32  -1  202.08   24.10
   2 -32   1   29.30   12.60
  -2 -32  -1   54.49   15.00
   2  32   1   61.29   14.80
  -2  32  -1   40.50   14.90
  -3 -32  -1   23.60   13.00
   3 -32   1   15.70   11.40
  -3  32  -1   47.30   16.30
   3  32   1   32.10   14.90
  -2 -33   1    5.40   11.20
   2 -33  -1    8.40   11.80
   2  33  -1    0.00   10.90
  -2  33   1    3.60   12.50
  -1 -33   1   13.40   11.80
   1 -33  -1    2.10   10.40
   1  33  -1   15.60   12.00
  -1  33   1   23.70   13.70
   0 -33   1    4.50    9.90
   0 -33  -1   13.50   11.10
   0  33   1    7.80   10.30
   0  33  -1    0.00   10.90
  -1 -33  -1   35.80   13.70
   1 -33   1    0.00   10.50
   1  33   1   36.50   13.20
  -1  33  -1   23.40   13.00
   2 -33   1    0.00    9.20
  -2 -33  -1    4.30   11.30
  -2  33  -1    0.00   11.40
   2  33   1   17.60   12.30
   1 -34  -1   13.70   12.10
  -1 -34   1    0.00   10.90
   1  34  -1    0.00    9.90
  -1  34   1   22.50   11.80
   0 -34   1  268.57   27.40
   0 -34  -1  346.57   30.40
   0  34  -1  343.77   31.00
   0  34   1  348.27   32.10
  -1 -34  -1  125.39   19.60
   1  34   1  157.68   22.30
  -1  34  -1  152.18   22.90
   9   0  -2  486.95   43.70
   8   0  -2  713.23   38.00
   8   0  -2  656.63   48.10
   7   0  -2 1860.61   68.39
   6   0  -2  287.07   21.60
  -6   0   2  283.27   31.10
   5   0  -2   12.10    9.00
   5   0  -2   28.40    4.30
  -5   0   2    7.20   12.90
   4   0  -2  364.26   12.10
  -4   0   2  338.37   27.60
   4   0  -2  349.77   20.70
   3   0  -2   91.49    5.00
  -3   0   2  116.59   16.10
   3   0  -2   77.19   11.10
   3   0  -2   70.59    5.30
   2   0  -2 1902.31   60.19
  -2   0   2 1997.80   72.89
  -2   0   2 1977.50   51.59
   2   0  -2 2051.19   51.99
  -1   0   2 5700.73  150.98
  -1   0   2 5886.31  194.28
   1   0  -2 6176.28  161.78
   1   0  -2 5943.71  151.28
   0   0   2   10.00    3.20
   0   0  -2   12.50    3.80
   0   0  -2   16.30    3.40
   0   0   2   16.40    5.40
  -1   0  -2 1086.89   33.60
   1   0   2 1111.19   40.80
   2   0   2  251.37   16.60
   2   0   2  203.08    9.10
  -2   0  -2  205.58   12.30
  -3   0  -2   89.19    9.80
   3   0   2   94.29    8.10
   3   0   2  100.49   14.00
   4   0   2  895.11   32.00
  -4   0  -2  925.71   33.10
   4   0   2 1002.40   45.80
  -5   0  -2  384.76   19.90
   5   0   2  351.86   19.10
   5   0   2  365.36   29.20
   6   0   2  109.29   21.40
  -6   0  -2  135.59   13.70
   7   0   2  327.47   36.60
   8   0   2  198.38   31.10
   9   0   2  189.58   33.60
   9  -1  -2   32.40   18.40
   9   1  -2  123.69   28.00
   8  -1  -2  328.97   39.30
   8  -1  -2  365.76   28.30
   8   1  -2  411.46   38.50
   8   1  -2  416.46   28.90
   7  -1  -2    0.00   10.90
   7   1  -2   21.20   12.40
  -6  -1   2  125.39   23.40
   6  -1  -2  133.09   17.00
  -6   1   2  126.99   22.70
   6   1  -2  136.99   16.90
   5  -1  -2  256.97   11.10
  -5  -1   2  264.97   27.80
   5  -1  -2  196.28   19.20
   5   1  -2  253.67   18.20
  -5   1   2  258.27   27.80
   5   1  -2  243.78    9.80
   4  -1  -2    0.00    6.40
  -4  -1   2    7.00   11.50
   4  -1  -2    5.60    2.90
  -4   1   2   17.80   12.70
   4   1  -2    1.30    2.00
   4   1  -2    2.30    2.50
   4   1  -2    0.00    7.00
   3  -1  -2  354.06   11.90
  -3  -1   2  400.66   26.10
   3  -1  -2  335.67   18.90
   3   1  -2  332.47   19.20
  -3   1   2  345.97   25.30
  -2  -1   2    9.10    9.80
   2  -1  -2    0.00    6.30
  -2  -1   2    0.40    1.70
   2  -1  -2    4.20    2.60
  -2   1   2   30.10   11.00
   2   1  -2    0.00    5.20
  -2   1   2    7.80    2.40
   2   1  -2    1.00    2.20
  -1  -1   2   96.59    6.00
  -1  -1   2  121.29   11.60
   1  -1  -2  108.99    9.00
   1  -1  -2  126.79    7.00
   1   1  -2  102.89    8.50
  -1   1   2  106.39    6.50
   1   1  -2  102.89    6.50
   0  -1   2    4.10    2.80
   0  -1  -2    7.60    3.20
   0  -1  -2    4.80    3.20
   0  -1   2    8.90    4.90
   0  -1  -2    9.00    3.60
   0   1  -2    7.70    2.80
   0   1  -2    5.00    3.60
   0   1   2    1.00    5.20
  -1  -1  -2  127.19    9.50
   1  -1   2  136.19   11.00
   1   1   2  126.99   11.70
  -1   1  -2  130.69    9.70
  -1   1  -2  126.19    5.10
  -2  -1  -2 1098.29   34.20
   2  -1   2 1130.79   43.00
   2  -1   2  973.00   30.70
   2  -1   2 1055.89   31.50
  -2   1  -2 1070.49   34.30
   2   1   2 1097.09   43.00
   2   1   2 1059.99   30.70
   3  -1   2  542.55   28.20
  -3  -1  -2  488.05   20.70
   3  -1   2  471.05   19.00
   3   1   2  508.15   18.40
   3   1   2  527.75   28.20
  -3   1  -2  505.85   21.10
   4  -1   2  159.68   12.10
  -4  -1  -2  189.58   13.90
   4  -1   2  262.07   21.50
   4   1   2  157.98   11.50
   4   1   2  189.08   21.10
  -4   1  -2  176.98   13.20
   5  -1   2  196.38   14.90
  -5  -1  -2  203.68   15.10
   5  -1   2  259.07   27.00
  -5   1  -2  218.68   15.60
   5   1   2  172.98   14.10
   5   1   2  239.68   26.40
  -6  -1  -2   15.20    6.60
   6  -1   2   30.60   16.00
  -6   1  -2   24.90    7.90
   6   1   2   44.10   16.30
   7  -1   2    4.30   14.60
   7   1   2   74.39   19.60
   8  -1   2  226.18   32.80
   8   1   2  201.08   31.50
   9  -1   2  180.68   33.60
   9   1   2  223.68   35.10
   9  -2  -2    0.60   17.80
   9   2  -2   21.60   18.50
   8  -2  -2   68.29   17.50
   8  -2  -2  149.79   27.10
   8   2  -2   35.60   13.90
   8   2  -2   49.20   21.30
   7  -2  -2    1.30   12.00
   7   2  -2   16.10   10.60
   7   2  -2   37.00   18.30
   6  -2  -2   12.40    9.60
  -6   2   2   18.60   16.10
   6   2  -2    7.80    8.00
   5  -2  -2    3.80    3.80
  -5  -2   2   15.70   13.10
   5  -2  -2    8.50    8.20
  -5   2   2    7.20   13.50
   5   2  -2    0.00    6.40
   4  -2  -2   60.29    5.70
   4  -2  -2   49.80   10.90
  -4  -2   2   70.29   15.60
   4   2  -2   58.59   10.80
  -4   2   2   56.49   15.10
   3  -2  -2    1.50    6.50
  -3  -2   2   34.30   11.70
   3  -2  -2    4.80    2.80
  -3   2   2    5.50   10.80
   3   2  -2    0.60    6.40
   2  -2  -2    0.00    5.50
  -2  -2   2    4.30    9.30
   2  -2  -2    2.10    2.60
  -2  -2   2    2.00    1.70
  -2   2   2    6.00   10.10
   2   2  -2    0.40    5.10
   2   2  -2    0.00    1.90
  -1  -2   2  111.29    6.50
   1  -2  -2  106.59    7.00
  -1  -2   2  125.39   11.50
   1  -2  -2  114.59    9.10
  -1   2   2  106.59   11.90
   1   2  -2  105.19    8.50
   1   2  -2  110.29    6.70
   0  -2   2  739.83   27.80
   0  -2  -2  716.73   23.40
   0  -2  -2  798.02   23.10
   0   2   2  764.02   29.70
   0   2  -2  736.13   23.50
   0   2   2  762.02   23.20
   0   2  -2  723.53   22.50
  -1  -2  -2  315.67   13.80
  -1  -2  -2  296.87    9.50
   1  -2   2  301.47    9.50
   1  -2   2  285.37   15.40
   1   2   2  279.87   16.50
  -1   2  -2  302.17    9.80
   1   2   2  311.57    9.30
  -1   2  -2  291.77   14.00
   2  -2   2  255.37   10.40
   2  -2   2  313.07   17.90
  -2  -2  -2  261.67   13.60
  -2   2  -2  291.17   14.40
   2   2   2  276.17   17.90
   2   2   2  269.37   10.20
   3  -2   2   36.30   10.20
  -3  -2  -2    8.50    5.50
   3  -2   2   19.30    5.30
   3   2   2    8.30    3.90
   3   2   2   15.20    8.70
  -3   2  -2   10.40    5.60
   4  -2   2   43.40    7.60
  -4  -2  -2   55.29    8.50
   4  -2   2   56.59   13.30
  -4   2  -2   40.30    8.00
   4   2   2   37.30   12.40
   4   2   2   26.20    6.20
   5  -2   2    4.30    7.50
   5  -2   2   61.19   15.00
  -5  -2  -2   18.60    6.70
   5   2   2    4.10    6.80
  -5   2  -2   19.00    7.30
   5   2   2   41.30   14.70
   6  -2   2   12.10   13.40
  -6  -2  -2   11.80    6.90
  -6   2  -2    3.70    6.40
   6   2   2    0.00   12.20
   7  -2   2   95.09   22.60
   7   2   2   54.19   19.00
   8  -2   2   54.49   21.20
   8   2   2   51.59   20.80
   9  -2   2  133.59   28.90
   9   2   2   76.49   23.10
   9  -3  -2   85.79   26.60
   9   3  -2   69.29   24.60
   8  -3  -2  745.73   39.50
   8  -3  -2  701.23   49.60
   8   3  -2  697.63   37.30
   8   3  -2  582.04   46.60
   7   3  -2   29.40   11.90
   7   3  -2   53.79   19.00
   6  -3  -2   97.79    9.20
   6  -3  -2  121.09   16.90
  -6   3   2  125.39   23.00
   6   3  -2  106.29   14.80
  -5  -3   2   49.80   16.20
   5  -3  -2   59.49    6.70
   5  -3  -2   39.00   10.90
  -5   3   2   38.40   15.90
   5   3  -2   48.90   10.40
   4  -3  -2  250.07   18.60
  -4  -3   2  305.67   24.90
   4  -3  -2  256.87   11.50
  -4   3   2  229.98   24.70
   4   3  -2  246.68   17.70
   3  -3  -2 1916.11   61.59
  -3  -3   2 1896.31   73.39
   3  -3  -2 1942.51   52.19
   3   3  -2 1885.51   60.39
  -3   3   2 1913.61   74.09
   2  -3  -2  113.49   11.10
  -2  -3   2  124.39   14.20
  -2  -3   2   97.19    4.90
   2  -3  -2   99.69    7.10
   2   3  -2   91.09    9.60
   2   3  -2  101.89    5.10
  -2   3   2  114.99   15.50
  -1  -3   2 1309.37   46.50
  -1  -3   2 1312.47   35.60
   1  -3  -2 1258.47   36.10
  -1   3   2 1281.77   48.80
   1   3  -2 1270.47   39.20
  -1   3   2 1223.78   39.70
   1   3  -2 1296.87   35.50
   0  -3  -2  157.88    8.10
   0  -3   2  117.39    9.70
   0  -3  -2  145.19    8.70
   0   3  -2  150.08    7.70
   0   3  -2  156.18    9.70
   0   3   2  171.28   13.20
   0   3   2  149.39    8.30
   0   3  -2  158.28    9.30
   1  -3   2  599.74   24.70
  -1  -3  -2  615.84   21.50
   1  -3   2  607.14   18.20
  -1  -3  -2  611.44   18.20
   1   3   2  614.74   26.60
   1   3   2  613.44   18.00
  -1   3  -2  632.14   22.00
  -1   3  -2  601.64   18.50
  -2  -3  -2    7.40    4.60
   2  -3   2    1.70    6.40
  -2   3  -2    7.30    4.80
   2   3   2    3.80    2.70
  -2   3  -2    7.10    4.10
   2   3   2    2.90    7.10
   3  -3   2  909.81   40.90
   3  -3   2  920.41   31.00
  -3  -3  -2  964.90   31.90
  -3   3  -2  951.10   32.70
   3   3   2  919.91   41.90
   3   3   2  898.01   29.30
  -4  -3  -2   79.39    9.40
   4  -3   2   38.90    8.30
   4   3   2   76.99    8.20
   4   3   2   84.79   15.20
  -4   3  -2   85.69   10.70
   5  -3   2  358.16   20.70
  -5  -3  -2  428.56   20.80
   5  -3   2  444.06   30.90
  -5   3  -2  408.36   21.20
   5   3   2  408.16   30.50
   5   3   2  376.86   19.60
  -6  -3  -2   50.39    9.50
   6  -3   2   34.20   14.80
   6   3   2   28.70   15.50
  -6   3  -2   49.30    9.70
   7  -3   2   39.80   17.40
   7   3   2   11.30   14.90
   8  -3   2   97.39   25.20
   8   3   2   92.29   24.40
   9  -3   2  363.06   44.00
   9   3   2  298.67   40.20
   9  -4  -2  160.48   32.10
   9   4  -2  191.78   33.30
   8  -4  -2  272.67   27.90
   8  -4  -2  318.37   39.00
   8   4  -2  287.17   26.60
   8   4  -2  392.76   36.70
   7  -4  -2 1247.58   50.49
  -7   4   2  907.31   56.79
   7   4  -2  985.90   58.09
   7   4  -2 1245.58   48.20
   6  -4  -2  231.78   13.40
   6  -4  -2  240.28   22.40
   6   4  -2  231.38   20.70
  -6   4   2  202.48   27.40
   6   4  -2  191.88   27.00
   5  -4  -2    0.00    7.80
   5  -4  -2   24.60    5.20
   5   4  -2    4.20    6.80
  -5   4   2   29.40   14.60
   4  -4  -2 1147.59   33.50
  -4  -4   2 1060.79   50.79
   4  -4  -2 1083.19   42.00
   4   4  -2 1153.18   41.60
  -4   4   2 1050.59   51.39
   3  -4  -2 1074.99   39.10
   3  -4  -2 1040.20   31.10
  -3  -4   2 1016.10   45.70
   3   4  -2  990.80   37.00
  -3   4   2 1099.99   47.30
  -2  -4   2 2355.36   85.79
  -2  -4   2 2480.25   62.89
   2  -4  -2 2447.16   65.39
   2   4  -2 2433.26   72.09
   2   4  -2 2563.44   62.89
  -2   4   2 2260.67   87.29
  -1  -4   2  484.55   21.70
   1  -4  -2  470.85   16.70
   1   4  -2  475.85   15.90
  -1   4   2  528.45   26.10
   1   4  -2  457.85   18.20
  -1   4   2  424.16   18.70
   0  -4   2   19.20    5.10
   0  -4  -2   18.20    4.30
   0   4  -2   21.10    3.90
   0   4  -2   23.70    4.60
   0   4  -2   26.40    5.20
   0   4   2   31.50    4.50
   0   4   2   17.00    7.60
   1  -4   2  431.76   18.90
  -1  -4  -2  456.15   17.20
  -1   4  -2  458.05   18.20
   1   4   2  410.46   20.90
  -1   4  -2  417.96   14.40
   1   4   2  430.66   14.00
  -2  -4  -2  770.02   26.10
   2  -4   2  761.82   32.20
  -2   4  -2  766.12   25.40
   2   4   2  736.93   23.40
  -2   4  -2  770.12   27.50
   2   4   2  789.22   34.10
   3  -4   2   59.19   11.20
  -3  -4  -2   53.29    7.80
   3   4   2   71.49   12.80
   3   4   2   47.90    6.00
  -3   4  -2   52.39    8.20
   4  -4   2 2370.56   93.89
   4  -4   2 2461.15   74.49
  -4  -4  -2 2570.04   72.19
   4   4   2 2458.45   94.99
  -4   4  -2 2437.86   72.79
   4   4   2 2537.95   72.69
  -5  -4  -2  400.66   20.10
   5  -4   2  381.56   21.20
   5  -4   2  400.86   29.70
   5   4   2  408.26   20.00
   5   4   2  393.86   29.90
  -5   4  -2  432.76   21.60
   6  -4   2   69.39   18.50
   6   4   2   41.30   15.20
  -6   4  -2   52.19   10.20
   7  -4   2  276.67   33.50
   7   4   2  253.17   32.40
   8  -4   2  252.67   33.10
   8   4   2  132.69   27.40
   9  -4   2  111.49   27.50
   9   4   2  171.68   32.40
   9  -5  -2   18.50   20.40
   9   5  -2   72.09   22.00
   8  -5  -2  217.48   25.00
   8   5  -2  218.88   23.50
   8   5  -2  234.18   32.00
   7  -5  -2    0.00    8.50
  -7   5   2   38.20   18.30
   7   5  -2   40.40   12.30
   6  -5  -2   81.59   15.00
   6  -5  -2  114.39   10.70
  -6   5   2   94.99   22.20
   6   5  -2  140.39   16.80
   6   5  -2  104.99   21.40
   5  -5  -2  505.35   20.10
   5  -5  -2  500.55   27.70
   5   5  -2  547.45   27.20
  -5   5   2  504.65   35.90
  -4  -5   2  190.08   21.80
   4  -5  -2  166.48   10.40
   4  -5  -2  157.68   16.10
  -4   5   2  214.78   23.90
   4   5  -2  167.78   15.70
  -3  -5   2 1211.28   51.09
   3  -5  -2 1220.38   35.90
   3  -5  -2 1140.19   42.60
  -3   5   2 1258.47   52.59
   3   5  -2 1196.18   41.70
  -2  -5   2 4007.70   98.19
   2  -5  -2 3795.12  100.49
  -2  -5   2 3646.64  129.29
  -2   5   2 3888.01  131.99
  -2   5   2 3768.02  109.69
   2   5  -2 3701.93  108.09
   2   5  -2 3808.12   97.79
  -1  -5   2  236.98   14.40
   1  -5  -2  201.08   10.50
   1   5  -2  219.98   10.30
   1   5  -2  184.08   11.00
  -1   5   2  235.98   19.90
  -1   5   2  207.68   12.90
   0  -5   2  187.58   11.30
   0  -5  -2  247.48   11.70
   0   5  -2  252.67   10.60
   0   5   2  236.98   10.80
   0   5  -2  254.87   12.20
   0   5  -2  237.28   10.80
   0   5   2  239.18   16.70
  -1  -5  -2  481.05   18.00
   1  -5   2  462.25   19.40
  -1   5  -2  449.06   15.70
   1   5   2  443.96   15.10
  -1   5  -2  459.45   18.60
   1   5   2  459.85   22.30
   2  -5   2 1230.98   47.10
  -2  -5  -2 1301.77   38.30
   2   5   2 1223.88   48.50
  -2   5  -2 1219.48   39.20
  -2   5  -2 1203.18   37.70
   2   5   2 1187.68   35.90
  -3  -5  -2 1017.80   33.50
   3  -5   2 1078.69   44.10
  -3   5  -2  963.10   34.40
   3   5   2  981.80   44.00
  -3   5  -2  974.50   34.10
   3   5   2  963.50   31.40
   4  -5   2   46.20   12.30
   4  -5   2   21.20    7.00
  -4  -5  -2    6.50    5.90
   4   5   2   21.40    6.40
  -4   5  -2   15.10    6.70
   5  -5   2   32.90   13.70
   5  -5   2    3.50    6.90
  -5  -5  -2   20.80    6.80
  -5   5  -2   16.90    7.60
   5   5   2    1.80    6.10
   5   5   2   21.40   12.30
   6  -5   2  195.78   27.20
   6   5   2  194.68   27.10
  -6   5  -2  225.28   18.50
   7  -5   2   30.20   17.50
   7   5   2   65.29   20.10
   8  -5   2  648.24   46.70
   8   5   2  529.25   44.10
   9  -5   2  146.19   31.00
   9  -6  -2   35.10   22.90
   9   6  -2   75.89   24.90
   8  -6  -2   26.40   13.60
   8   6  -2   11.60   11.60
   8   6  -2   21.90   17.10
   7  -6  -2   14.10   11.30
   7   6  -2   15.60   15.90
  -7   6   2   13.90   17.30
   7   6  -2    0.00    8.80
   6  -6  -2  175.48   12.80
   6  -6  -2  184.68   20.30
  -6   6   2  165.08   26.40
   6   6  -2  189.98   19.10
   6   6  -2  198.88   26.80
   5  -6  -2    5.20    7.90
   5  -6  -2    9.20    4.80
  -5   6   2   22.30   13.90
   5   6  -2    7.10   12.10
   5   6  -2    0.00    7.00
   4  -6  -2   97.79    8.80
   4  -6  -2   93.99   13.30
   4   6  -2  108.69   12.90
  -4   6   2   84.09   17.30
  -3  -6   2    0.30    1.80
   3  -6  -2    2.90    3.60
  -3  -6   2    2.80    2.20
  -3  -6   2    0.00    9.50
  -3   6   2    0.00    6.00
   3   6  -2    1.80    5.70
  -3   6   2    3.80   10.50
  -2  -6   2  197.08   16.90
   2  -6  -2  186.28   10.40
  -2   6   2  180.08   14.20
   2   6  -2  195.98    8.60
  -2   6   2  187.48   19.30
   2   6  -2  197.78   13.10
   1  -6  -2  190.38   10.70
  -1  -6   2  217.18   13.70
   1   6  -2  202.78   13.80
   1   6  -2  188.48   10.10
  -1   6   2  176.78   11.70
   1   6  -2  187.58   10.90
  -1   6   2  215.98   18.00
   0  -6  -2  171.08   10.20
   0   6  -2  161.28   10.90
   0   6   2  160.88    9.70
   0   6  -2  181.68    9.30
   0   6   2  178.68   15.40
  -1  -6  -2  320.97   14.70
   1  -6   2  347.17   15.60
  -1   6  -2  329.57   13.30
  -1   6  -2  345.67   16.20
   1   6   2  337.17   18.90
   1   6   2  340.27   12.80
  -2  -6  -2    8.20    4.70
   2  -6   2   14.10    6.70
   2   6   2   11.60    7.70
  -2   6  -2    7.00    4.20
  -2   6  -2   13.80    5.20
   2   6   2    6.20    3.30
  -3  -6  -2  503.05   21.00
   3  -6   2  559.64   28.60
   3   6   2  508.85   19.30
   3   6   2  563.14   29.80
  -3   6  -2  518.55   22.50
  -3   6  -2  474.95   22.40
   4  -6   2    5.90   10.00
  -4  -6  -2   11.40    5.50
   4  -6   2    2.70    5.80
  -4   6  -2    0.00    5.40
   4   6   2    0.00    4.10
   4   6   2    0.00    8.80
   5  -6   2   77.79   16.70
  -5  -6  -2   76.69   10.20
   5  -6   2   70.29   11.10
  -5   6  -2   86.49   11.90
   5   6   2   70.79   17.40
   5   6   2   76.69    9.80
   6  -6   2   52.49   17.40
   6   6   2   65.09   18.70
  -6   6  -2   48.40   10.50
   7  -6   2   35.40   16.20
   7   6   2   51.89   19.10
   8   6   2  182.38   30.60
   9  -7  -2   59.99   24.10
   9   7  -2   24.20   20.10
   8  -7  -2  433.36   30.20
   8   7  -2  335.17   39.20
   8   7  -2  361.46   26.80
   7  -7  -2   23.80   11.90
   7   7  -2    8.00   14.80
   7   7  -2    0.00    9.20
  -7   7   2   65.89   20.50
   6  -7  -2  203.58   13.90
   6  -7  -2  184.78   20.50
  -6   7   2  203.58   28.70
   6   7  -2  207.58   19.80
   6   7  -2  170.08   25.90
   5  -7  -2  448.06   18.60
   5  -7  -2  439.06   25.50
   5   7  -2  379.76   30.30
   5   7  -2  401.06   23.40
  -5   7   2  341.57   31.20
   4  -7  -2   14.00    8.30
   4  -7  -2   18.70    5.10
   4   7  -2   11.70    7.10
  -4   7   2   21.90   13.30
   3  -7  -2  928.61   30.70
  -3  -7   2  892.71   26.30
  -3  -7   2  957.70   42.80
  -3  -7   2  976.00   26.90
  -3   7   2  916.71   44.50
  -3   7   2  980.80   38.30
   3   7  -2 1024.40   35.90
  -2  -7   2  923.31   37.90
   2  -7  -2  958.10   29.50
  -2   7   2  901.31   33.60
  -2   7   2  836.42   40.50
   2   7  -2  905.01   31.90
  -1  -7   2   93.29    9.10
   1  -7  -2   79.89    7.80
   1   7  -2   77.09    7.90
  -1   7   2   88.99   13.60
   1   7  -2   75.19    8.80
   1   7  -2   98.89    8.00
  -1   7   2   77.39    8.80
   0  -7  -2  431.46   17.30
   0   7   2  442.56   23.20
   0   7  -2  421.56   17.70
   0   7   2  450.35   17.20
   0   7  -2  445.56   16.70
   1  -7   2  499.05   20.00
  -1  -7  -2  476.95   18.80
  -1   7  -2  451.95   17.40
  -1   7  -2  481.25   20.20
   1   7   2  520.65   24.20
   1   7   2  478.95   17.10
  -2  -7  -2   41.50    6.60
   2  -7   2   45.90    8.70
  -2   7  -2   46.20    6.40
   2   7   2   53.19    5.50
  -2   7  -2   42.60    7.90
   2   7   2   51.29   10.20
  -3  -7  -2 1076.09   35.70
   3  -7   2 1119.49   46.30
   3   7   2 1079.29   34.60
   3   7   2 1097.09   47.50
  -3   7  -2 1081.59   38.10
  -3   7  -2 1080.29   37.50
  -4  -7  -2   20.20    5.90
   4   7   2   20.80    5.80
  -4   7  -2   12.60    7.80
   4   7   2   32.80   11.60
  -4   7  -2   21.20    7.50
   5  -7   2  580.74   27.60
   5  -7   2  630.84   37.80
  -5  -7  -2  667.13   26.60
  -5   7  -2  629.34   28.10
   5   7   2  613.04   25.50
   5   7   2  594.84   38.20
   6  -7   2  239.98   29.00
   6   7   2  225.98   29.20
  -6   7  -2  165.78   16.40
   7  -7   2   13.60   16.10
   7   7   2   20.90   16.70
   8  -7   2   92.69   24.70
   8   7   2   70.39   23.70
   9  -8  -2  138.19   30.20
   9   8  -2  142.39   30.30
   8  -8  -2   13.40   11.60
   8   8  -2   78.99   22.20
   8   8  -2   32.40   12.80
   7  -8  -2  487.85   30.60
   7   8  -2  467.75   28.40
  -7   8   2  394.76   37.30
   7   8  -2  402.56   35.40
   6  -8  -2  433.16   28.10
   6  -8  -2  438.36   20.30
   6   8  -2  425.36   34.00
  -6   8   2  414.26   35.70
   6   8  -2  402.26   25.20
   5  -8  -2    5.30    5.20
   5  -8  -2    8.00    9.10
   5   8  -2   20.30   13.60
   5   8  -2    0.50    7.00
  -5   8   2   33.40   16.20
  -4  -8   2 1738.23   46.00
  -4  -8   2 1744.93   46.20
   4  -8  -2 1699.93   51.59
   4   8  -2 1767.92   71.19
   4   8  -2 1723.93   58.09
  -4   8   2 1724.53   72.29
  -3  -8   2  139.09    7.20
   3  -8  -2  124.39   10.30
  -3   8   2  107.09   13.70
   3   8  -2  121.59   12.40
  -3   8   2  142.29   19.30
  -2  -8   2 1435.36   40.60
   2  -8  -2 1481.25   43.50
   2   8  -2 1414.26   46.20
  -2   8   2 1472.15   48.40
  -2   8   2 1397.36   57.99
   1  -8  -2  666.63   23.60
   1   8  -2  678.63   22.90
  -1   8   2  633.34   31.60
   1   8  -2  693.83   24.60
  -1   8   2  666.83   25.50
   0  -8  -2    0.00    3.90
   0   8   2   14.10    4.70
   0   8   2    5.90    7.70
   0   8  -2    5.20    4.60
   0   8  -2    6.40    3.80
   1  -8   2  362.06   16.00
  -1  -8  -2  390.06   16.40
  -1   8  -2  354.76   15.00
   1   8   2  343.17   14.30
  -1   8  -2  383.46   17.60
   1   8   2  368.76   20.20
  -2  -8  -2 1028.80   33.40
   2  -8   2 1021.20   40.20
   2   8   2  981.30   31.90
  -2   8  -2  993.10   33.30
  -2   8  -2 1091.09   35.80
   2   8   2 1021.70   42.70
  -3  -8  -2  140.99   11.60
   3  -8   2  150.58   16.10
  -3   8  -2  150.88   12.80
   3   8   2  140.29   16.90
   3   8   2  124.19    9.40
  -3   8  -2  114.79   12.10
   4  -8   2 1419.86   59.99
  -4  -8  -2 1374.26   44.90
   4   8   2 1443.96   61.79
  -4   8  -2 1315.37   47.20
   4   8   2 1437.06   45.20
  -4   8  -2 1498.45   49.50
   5  -8   2  613.54   29.00
  -5  -8  -2  643.84   26.10
   5  -8   2  567.74   36.70
   5   8   2  647.24   39.00
  -5   8  -2  593.44   27.70
   5   8   2  671.53   26.40
   6  -8   2  138.39   22.60
   6   8   2  167.88   24.70
  -6   8  -2  154.08   16.00
   7  -8   2  212.48   30.40
   7   8   2  258.07   33.50
   8  -8   2   80.99   22.10
   8   8   2   53.69   21.50
   9  -9  -2  324.97   42.30
   9   9  -2  267.67   38.20
   8  -9  -2  197.98   24.30
  -8   9   2  130.39   29.00
   8   9  -2  196.08   22.40
   8   9  -2  209.38   32.20
   7  -9  -2  153.48   20.30
  -7   9   2  142.89   26.70
   7   9  -2  164.68   26.30
   7   9  -2  135.89   18.00
   6  -9  -2  327.37   18.20
   6  -9  -2  356.56   25.60
   6   9  -2  356.66   23.60
  -6   9   2  349.87   33.00
   6   9  -2  306.57   29.10
   5  -9  -2 1019.00   35.90
   5  -9  -2 1114.49   45.60
   5   9  -2 1023.40   51.59
  -5   9   2  994.10   53.69
   5   9  -2 1093.89   42.30
   4  -9  -2   28.10    6.40
  -4  -9   2   40.40    4.10
   4   9  -2   26.70   12.60
  -4   9   2   22.90    9.00
   4   9  -2   12.00    7.50
  -4   9   2   39.60   15.40
  -3  -9   2 1430.16   40.90
   3  -9  -2 1456.05   45.20
   3   9  -2 1451.65   49.10
  -3   9   2 1580.94   62.69
  -3   9   2 1474.65   51.89
   3   9  -2 1467.45   58.79
   2  -9  -2  646.44   23.80
  -2  -9   2  650.73   21.40
  -2   9   2  598.54   33.80
   2   9  -2  625.04   25.00
   2   9  -2  685.23   29.50
  -2   9   2  649.14   27.30
   1  -9  -2  150.98   10.70
   1   9  -2  165.38   11.70
  -1   9   2  164.78   17.20
   1   9  -2  167.28   10.50
  -1   9   2  162.88   12.40
   1   9  -2  170.38   10.90
   1   9  -2  172.38   10.60
   0  -9  -2  822.82   28.10
   0   9   2  794.12   35.00
   0   9  -2  846.22   28.00
   0   9   2  833.92   28.40
   0   9  -2  831.72   28.80
   1  -9   2   91.19    8.10
  -1  -9  -2   98.49    9.30
   1   9   2   95.79    7.70
   1   9   2   97.59   11.90
  -1   9  -2   89.99    8.30
  -1   9  -2   94.59    9.70
  -2  -9  -2 1291.47   39.60
   2  -9   2 1238.78   47.00
  -2   9  -2 1266.97   40.20
   2   9   2 1167.48   38.00
   2   9   2 1202.68   49.40
  -2   9  -2 1276.67   41.40
   3  -9   2 2670.33   97.29
  -3  -9  -2 2728.73   76.89
   3   9   2 2641.54   77.89
  -3   9  -2 2806.62   81.39
   3   9   2 2728.43   99.79
  -3   9  -2 2657.23   79.39
  -4  -9  -2  370.46   18.20
   4  -9   2  381.46   26.00
  -4   9  -2  387.46   22.00
   4   9   2  346.27   17.20
  -4   9  -2  343.97   20.10
   4   9   2  380.66   27.10
   5  -9   2    0.00   11.00
  -5  -9  -2    0.10    5.20
   5   9   2    3.40    6.00
   5   9   2   22.40   12.70
  -5   9  -2    0.00    6.30
   6  -9   2  262.77   30.40
  -6   9  -2  230.98   19.80
   6   9   2  246.08   29.80
   7  -9   2    7.80   15.70
  -7   9  -2    0.20    8.20
   7   9   2   58.09   18.70
   8  -9   2  315.67   38.40
   8   9   2  328.97   38.50
   9 -10  -2  136.99   30.50
   9  10  -2  139.69   30.50
   8 -10  -2   14.50   12.60
   8  10  -2   35.60   12.00
   8  10  -2   67.99   22.10
  -8  10   2   38.60   20.90
   7 -10  -2   23.90   12.20
   7  10  -2   32.90   17.40
   7  10  -2    4.40    9.40
  -7  10   2   26.40   18.60
   6 -10  -2  584.14   25.60
   6 -10  -2  613.64   33.50
   6  10  -2  562.84   30.20
   6  10  -2  551.14   38.20
  -6  10   2  544.95   40.20
   5 -10  -2    9.80    5.60
   5 -10  -2    0.00    8.00
   5  10  -2    0.00   11.80
   5  10  -2    0.00    6.80
  -5  10   2   12.40   15.40
  -4 -10   2   31.60    4.30
   4 -10  -2   28.90    6.60
  -4  10   2    9.80    8.20
   4  10  -2   29.90   12.20
   4  10  -2   39.70    9.00
  -4  10   2   25.20   14.70
   3 -10  -2  453.25   20.10
  -3 -10   2  478.95   16.90
  -3  10   2  500.95   25.80
   3  10  -2  498.85   27.20
  -3  10   2  493.75   31.60
   3  10  -2  488.85   22.80
   2 -10  -2    0.60    4.40
  -2 -10   2    4.40    3.70
   2  10  -2    0.00    4.20
  -2  10   2    0.00    5.30
  -2  10   2    0.00   10.80
   2  10  -2    2.60    6.40
   1 -10  -2  220.98   13.00
  -1  10   2  257.07   21.60
   1  10  -2  236.68   12.90
  -1  10   2  223.48   13.80
   1  10  -2  241.68   12.00
   1  10  -2  248.58   13.20
   0 -10  -2  718.33   25.90
   0  10   2  717.73   32.30
   0  10  -2  690.83   25.10
   0  10  -2  752.32   26.60
   0  10   2  722.63   25.90
   1 -10   2   10.30    4.30
  -1 -10  -2    6.20    4.50
  -1  10  -2    3.80    4.80
  -1  10  -2    5.40    4.20
   1  10   2    6.70    7.20
   1  10   2    7.10    4.10
  -2 -10  -2    8.50    4.70
   2 -10   2    6.60    6.60
   2  10   2    2.90    6.90
   2  10   2    0.00    3.30
  -2  10  -2    0.00    4.30
  -2  10  -2    0.00    4.60
  -3 -10  -2  326.47   16.60
   3 -10   2  312.97   21.00
  -3  10  -2  297.47   17.80
  -3  10  -2  295.57   17.90
   3  10   2  314.27   22.10
   3  10   2  311.67   15.10
  -4 -10  -2   32.30    7.20
   4 -10   2   36.20   12.60
   4  10   2   47.20    7.60
  -4  10  -2   39.30    9.30
   4  10   2   40.60   13.30
  -4  10  -2   23.30    7.90
  -5 -10  -2    4.70    5.80
   5 -10   2    0.00   11.00
   5  10   2    9.50    6.10
   5  10   2   11.00   13.30
  -5  10  -2   11.90    7.50
  -5  10  -2   11.80    8.10
   6 -10   2   14.20   14.40
  -6  10  -2   10.70    8.30
   6  10   2   28.30   16.00
   7 -10   2   62.59   21.10
  -7  10  -2   87.29   13.80
   7  10   2   73.19   21.30
   8 -10   2   28.10   17.80
   8  10   2   55.99   21.90
   9 -11  -2   14.80   20.00
   9  11  -2   60.99   23.70
   8 -11  -2  155.88   22.30
   8  11  -2  175.38   21.60
   8  11  -2  152.48   29.40
  -8  11   2  121.89   27.70
   7 -11  -2   20.60   10.60
   7  11  -2    1.80   14.70
   7  11  -2   12.40    9.80
  -7  11   2   66.09   21.70
   6 -11  -2  175.18   15.40
   6 -11  -2  172.68   20.10
   6  11  -2  194.58   26.40
  -6  11   2  172.68   27.60
   6  11  -2  166.08   18.50
   5 -11  -2  157.58   14.30
  -5  11   2  187.18   26.60
   5  11  -2  139.09   21.30
   5  11  -2  153.18   16.50
  -4 -11   2   88.79    7.00
   4 -11  -2   86.79   10.20
   4  11  -2   83.59   15.40
  -4  11   2   90.19   19.00
  -4  11   2   74.29   13.60
   4  11  -2   97.79   12.80
   3 -11  -2  482.55   21.20
  -3 -11   2  491.05   17.70
  -3  11   2  440.76   24.50
   3  11  -2  487.45   26.80
  -3  11   2  489.05   31.40
   3  11  -2  516.75   23.00
  -2 -11   2    4.30    3.90
   2 -11  -2    6.30    4.90
   2  11  -2    6.80    6.60
   2  11  -2    1.90    4.60
  -2  11   2   11.60    6.60
  -2  11   2   17.40   12.30
   1 -11  -2   18.40    5.60
  -1  11   2   14.20    5.50
   1  11  -2   10.50    6.20
   1  11  -2   10.80    4.80
  -1  11   2    9.00   10.70
   1  11  -2   16.30    5.30
   1  11  -2    8.00    4.10
   0 -11  -2  860.71   29.40
   0  11  -2  829.42   29.00
   0  11   2  821.92   36.30
   0  11  -2  854.11   29.90
   0  11   2  795.12   29.00
   1 -11   2   97.29    9.50
  -1 -11  -2  104.79    9.90
   1  11   2  123.29   13.70
   1  11   2  115.09    9.70
  -1  11  -2  117.79   10.00
  -1  11  -2  107.99   11.70
  -2 -11  -2   39.10    6.90
   2 -11   2   26.40    7.90
  -2  11  -2   31.40    6.80
   2  11   2   33.70   10.00
  -2  11  -2   28.30    7.70
   2  11   2   37.60    6.10
   3 -11   2  290.37   20.10
  -3 -11  -2  283.97   15.70
   3  11   2  279.17   21.60
  -3  11  -2  293.47   17.20
   3  11   2  241.68   13.60
  -3  11  -2  267.87   17.40
   4 -11   2   35.40   12.60
  -4 -11  -2   28.00    7.10
   4  11   2   19.60   11.50
   4  11   2   32.30    7.20
  -4  11  -2   48.50   10.00
  -4  11  -2   31.80    8.80
  -5 -11  -2  139.79   13.60
   5 -11   2  145.69   21.40
  -5  11  -2  178.98   17.20
   5  11   2  145.49   22.40
   5  11   2  181.18   13.90
   6 -11   2   80.99   19.70
   6  11   2   73.29   19.70
  -6  11  -2   70.79   13.10
   7  11   2   50.19   19.00
  -7  11  -2   38.00   10.70
   8 -11   2  129.49   27.00
   8  11   2  100.29   26.00
   9  12  -2   80.79   25.30
   8 -12  -2   62.79   16.80
   8  12  -2   70.69   23.30
  -8  12   2   86.99   25.40
   8  12  -2   95.69   16.40
   7 -12  -2  635.14   35.80
   7  12  -2  579.64   31.50
  -7  12   2  529.75   42.30
   7  12  -2  465.45   39.10
   6 -12  -2  523.85   31.00
   6 -12  -2  494.95   24.10
   6  12  -2  443.26   35.10
  -6  12   2  429.76   37.50
   6  12  -2  550.14   28.40
   5 -12  -2  139.69   13.70
   5  12  -2  139.09   15.60
   5  12  -2  124.39   20.60
  -5  12   2  156.98   24.80
   4 -12  -2 1030.70   37.10
  -4 -12   2 1056.89   32.00
  -4  12   2 1065.89   44.50
   4  12  -2 1068.99   48.80
  -4  12   2 1015.20   51.49
   4  12  -2 1106.69   40.90
   3 -12  -2   60.49    8.90
  -3 -12   2   61.29    6.70
  -3  12   2   57.79   10.40
   3  12  -2   70.09   12.30
   3  12  -2   67.89    9.90
  -3  12   2   69.39   16.50
  -2 -12   2  177.78   11.30
   2 -12  -2  192.78   13.30
  -2  12   2  175.68   14.30
   2  12  -2  223.48   14.40
  -2  12   2  227.88   22.50
   2  12  -2  226.08   15.00
   1 -12  -2  979.90   35.00
   1  12  -2 1088.69   35.00
  -1  12   2 1072.39   37.20
  -1  12   2 1043.20   45.90
   1  12  -2 1073.99   36.30
   0 -12  -2    7.70    5.10
   0  12   2   20.30    5.50
   0  12   2    4.00    9.00
   0  12  -2    9.10    5.00
   0  12  -2   14.90    5.90
  -1 -12  -2 1643.34   49.10
   1  12   2 1570.44   49.10
  -1  12  -2 1678.33   50.89
  -1  12  -2 1495.35   49.30
   1  12   2 1534.15   59.79
  -2 -12  -2  541.85   21.90
   2 -12   2  511.75   24.00
  -2  12  -2  507.75   24.10
  -2  12  -2  527.45   22.60
   2  12   2  485.45   20.20
   2  12   2  497.95   27.20
  -3 -12  -2  452.75   20.30
   3 -12   2  421.56   24.80
  -3  12  -2  417.76   21.80
   3  12   2  418.16   18.60
  -3  12  -2  455.55   23.40
   3  12   2  451.85   27.30
  -4 -12  -2  306.67   17.10
   4 -12   2  278.67   23.20
   4  12   2  294.07   24.60
  -4  12  -2  299.47   20.10
  -4  12  -2  349.27   21.10
   4  12   2  322.37   16.90
  -5 -12  -2  626.24   26.30
   5 -12   2  607.14   37.00
  -5  12  -2  687.23   32.40
  -5  12  -2  581.44   29.50
   5  12   2  558.64   36.80
   5  12   2  631.74   26.50
   6 -12   2   54.19   16.30
   6  12   2   28.40   16.30
  -6  12  -2   40.40   10.70
   7 -12   2  448.46   37.30
   7  12   2  436.96   37.90
  -7  12  -2  474.25   27.70
   8 -12   2   73.09   22.30
   8  12   2    0.00   16.60
   9  13  -2  182.98   33.30
   8 -13  -2  134.79   22.30
   8  13  -2  172.08   20.80
  -8  13   2  126.69   28.60
   8  13  -2  152.98   28.80
   7 -13  -2  188.08   17.70
   7 -13  -2  207.38   24.40
   7  13  -2  214.68   29.70
  -7  13   2  216.18   32.00
   7  13  -2  196.08   20.80
   6 -13  -2  170.78   21.10
   6 -13  -2  177.58   16.10
   6  13  -2  138.69   23.30
   6  13  -2  171.88   18.40
  -6  13   2  188.58   28.70
   5 -13  -2  687.63   29.10
   5  13  -2  704.03   32.20
   5  13  -2  714.33   40.80
  -5  13   2  678.93   35.90
  -5  13   2  665.83   43.30
   4 -13  -2   85.59   11.10
  -4 -13   2  101.29    8.40
  -4  13   2  109.49   15.90
  -4  13   2  123.19   21.30
   4  13  -2  112.99   17.40
   4  13  -2   97.29   12.50
  -3 -13   2  728.63   25.40
   3 -13  -2  710.73   28.90
   3  13  -2  778.72   31.10
   3  13  -2  802.62   35.60
  -3  13   2  733.23   33.20
  -3  13   2  747.63   40.30
   2 -13  -2  303.97   16.40
  -2 -13   2  286.47   14.60
  -2  13   2  269.67   24.00
  -2  13   2  270.97   17.50
   2  13  -2  314.27   17.30
   2  13  -2  288.67   16.40
   1 -13  -2   23.20    6.20
   1  13  -2   32.80    7.20
  -1  13   2   20.80   11.70
   1  13  -2   29.30    6.40
  -1  13   2   27.90    7.10
   0 -13  -2 1066.19   36.60
   0  13  -2 1090.29   37.10
   0  13   2 1047.00   45.30
   0  13   2 1128.99   37.50
   0  13  -2 1089.99   36.80
  -1 -13  -2  515.45   21.80
   1  13   2  496.75   26.60
  -1  13  -2  523.85   23.10
   1  13   2  486.85   20.80
  -1  13  -2  490.45   21.50
  -2 -13  -2 1007.10   34.50
   2 -13   2  968.80   38.40
  -2  13  -2  990.90   36.70
   2  13   2  950.00   33.40
  -2  13  -2  984.10   35.60
   2  13   2  965.80   42.50
  -3 -13  -2 1070.59   37.50
   3 -13   2 1126.59   45.90
   3  13   2 1071.19   48.50
   3  13   2 1068.39   37.20
  -3  13  -2 1085.59   40.40
  -3  13  -2 1113.79   41.10
  -4 -13  -2   83.29   10.40
   4 -13   2   75.49   15.20
  -4  13  -2   63.49   11.90
   4  13   2   94.79   10.80
   4  13   2   91.39   16.50
  -4  13  -2   78.39   12.00
   5 -13   2   30.60   14.60
  -5 -13  -2   48.00    9.00
  -5  13  -2   44.10   10.80
  -5  13  -2   35.90   11.90
   5  13   2   69.19   15.80
   6 -13   2  314.57   29.60
   6  13   2  330.97   30.90
  -6  13  -2  352.56   23.10
   7 -13   2   49.90   20.10
  -7  13  -2   59.99   13.50
   7  13   2   85.19   21.10
   8 -13   2  303.07   37.80
   8  13   2  335.87   41.00
   9  14  -2  135.79   29.00
   8 -14  -2   71.49   18.00
  -8  14   2   54.79   23.80
   8  14  -2   79.39   24.40
   8  14  -2   91.99   17.10
   7 -14  -2   56.09   15.20
   7 -14  -2   28.80   10.40
   7  14  -2   63.29   13.20
   7  14  -2   60.59   20.40
  -7  14   2   50.69   22.00
   6 -14  -2  465.05   23.70
   6  14  -2  466.25   26.50
   6  14  -2  404.56   33.60
  -6  14   2  373.16   35.70
   5 -14  -2   90.19   11.70
   5  14  -2   62.99   16.80
  -5  14   2   46.10   19.70
   5  14  -2   72.99   12.40
  -5  14   2   68.29   15.50
  -4 -14   2   61.89    7.30
   4 -14  -2   74.59   10.80
  -4  14   2   70.09   18.70
  -4  14   2   51.59   12.10
   4  14  -2   63.19   14.60
   4  14  -2   70.09   11.10
  -3 -14   2   54.79    7.10
   3 -14  -2   67.59    9.80
   3  14  -2   36.30    8.40
   3  14  -2   47.60   11.40
  -3  14   2   62.89   17.00
  -3  14   2   56.69   11.20
   2 -14  -2   17.10    6.20
  -2 -14   2   15.60    5.50
   2  14  -2    9.30    6.30
   2  14  -2    0.00    5.20
  -2  14   2   11.90    7.10
  -2  14   2    4.40   12.60
   1 -14  -2  419.26   20.30
  -1 -14   2  457.65   20.20
  -1  14   2  468.95   28.70
   1  14  -2  441.56   20.60
  -1  14   2  445.56   21.60
   0 -14  -2  171.98   12.70
   0  14  -2  171.18   12.40
   0  14   2  206.98   19.00
   0  14   2  163.08   12.10
   0  14  -2  164.88   14.00
  -1 -14  -2    3.10    5.00
   1  14   2    3.30    7.50
  -1  14  -2    0.00    5.10
  -1  14  -2    0.00    4.40
   1  14   2    2.60    4.70
   2 -14   2   18.90    7.40
  -2 -14  -2   37.80    7.40
  -2  14  -2   26.60    6.90
   2  14   2   29.60    6.50
  -2  14  -2   17.10    7.60
   2  14   2   31.70   10.30
   3 -14   2   60.39   11.50
  -3 -14  -2   66.09    9.40
  -3  14  -2   53.39    9.60
   3  14   2   59.89   12.70
   3  14   2   62.89    8.70
  -3  14  -2   66.09   11.00
  -4 -14  -2  156.08   13.90
   4 -14   2  183.48   20.80
  -4  14  -2  147.59   15.90
   4  14   2  163.28   13.20
   4  14   2  152.68   19.70
  -4  14  -2  149.39   16.00
   5 -14   2   16.50   12.80
  -5 -14  -2   29.00    8.10
  -5  14  -2   36.90   12.10
   5  14   2   26.70    8.00
  -5  14  -2   18.50    9.30
   5  14   2   24.90   14.40
   6 -14   2   22.50   15.00
  -6  14  -2   10.50    9.10
   6  14   2   31.40   14.40
   7 -14   2   76.49   22.50
   7  14   2  117.09   25.40
  -7  14  -2   81.69   15.10
   8 -14   2   26.00   19.90
   8  14   2   66.29   23.10
   8 -15  -2   91.89   20.50
   8  15  -2   28.30   18.90
  -8  15   2   33.60   23.70
   8  15  -2   40.60   13.60
   7 -15  -2   17.00    8.60
   7 -15  -2   18.60   13.30
   7  15  -2   20.00   17.50
  -7  15   2   55.69   23.00
   7  15  -2   12.70   10.00
   6 -15  -2   71.49   12.00
  -6  15   2  108.39   24.90
   6  15  -2  112.09   15.80
   6  15  -2   89.49   20.00
  -6  15   2   82.09   18.10
   5 -15  -2  315.17   20.00
   5  15  -2  340.77   21.60
  -5  15   2  403.06   27.50
  -5  15   2  343.07   35.60
   5  15  -2  322.17   28.00
   4 -15  -2   31.10    8.30
  -4 -15   2   18.80    5.60
   4  15  -2   20.30    8.20
   4  15  -2   23.10   11.30
  -4  15   2   34.70   11.00
  -4  15   2   24.60   15.60
   3 -15  -2  154.48   14.70
  -3 -15   2  163.58   11.20
  -3  15   2  136.49   21.90
   3  15  -2  158.88   16.30
   3  15  -2  117.49   13.20
  -3  15   2  145.59   16.20
   2 -15  -2    0.00    4.80
  -2 -15   2    5.70    5.00
   2  15  -2    3.90    5.40
  -2  15   2    0.00    6.50
  -2  15   2    0.00   11.70
   2  15  -2    4.90    6.00
   1 -15  -2  230.48   14.40
  -1 -15   2  223.08   14.30
  -1  15   2  238.48   16.10
   1  15  -2  208.98   13.80
  -1  15   2  257.87   23.60
   0 -15  -2  572.54   24.30
   0  15  -2  581.74   24.20
   0  15   2  552.54   24.00
   0  15  -2  571.54   24.90
   0  15   2  566.24   30.90
  -1 -15  -2  213.28   14.10
  -1  15  -2  202.98   15.40
   1  15   2  217.78   14.00
  -1  15  -2  231.88   14.60
   1  15   2  214.28   19.60
   2 -15   2  230.48   15.50
  -2 -15  -2  240.38   15.10
   2  15   2  221.58   19.60
  -2  15  -2  255.27   16.70
   2  15   2  265.87   15.00
  -2  15  -2  249.88   17.60
   3 -15   2   31.00   10.30
  -3 -15  -2   24.20    6.90
  -3  15  -2   23.70    8.30
  -3  15  -2   19.10    8.00
   3  15   2   15.30    6.20
   3  15   2    4.30    9.70
   4 -15   2   89.39   15.90
  -4 -15  -2   59.49    9.80
   4  15   2   53.79   14.70
  -4  15  -2   62.19   11.50
   4  15   2   61.79    9.60
  -4  15  -2   65.89   11.90
   5 -15   2   41.00   15.10
   5  15   2   45.90   15.60
  -5  15  -2   46.50   12.70
   5  15   2   67.29   10.60
  -5  15  -2   49.90   11.20
   6 -15   2  304.97   32.30
  -6  15  -2  260.47   23.00
   6  15   2  289.07   33.50
   7  15   2   80.79   22.90
   8  15   2   66.69   23.20
   8 -16  -2   31.50   15.60
   8  16  -2   35.40   20.00
  -8  16   2   49.99   22.50
   8  16  -2    3.70   10.80
   7 -16  -2  264.27   20.10
   7 -16  -2  227.78   26.10
   7  16  -2  260.37   24.00
  -7  16   2  216.58   34.00
   7  16  -2  226.98   30.80
   6 -16  -2  205.58   18.80
   6  16  -2  224.68   21.40
   6  16  -2  226.98   28.30
  -6  16   2  213.38   31.80
  -6  16   2  207.58   25.00
   5 -16  -2  222.78   19.20
   5  16  -2  236.98   26.20
  -5  16   2  267.27   26.00
  -5  16   2  224.78   30.20
   5  16  -2  245.08   19.20
  -4 -16   2  649.24   23.70
   4 -16  -2  626.64   28.20
   4  16  -2  572.24   33.00
  -4  16   2  585.64   32.60
  -4  16   2  601.14   38.80
   4  16  -2  636.64   29.40
  -3 -16   2   65.79    8.50
   3 -16  -2   63.99   10.10
   3  16  -2   68.49   12.30
   3  16  -2   74.79   11.10
  -3  16   2   86.09   19.20
  -3  16   2   82.09   13.50
   2 -16  -2  217.48   15.60
  -2 -16   2  252.87   14.60
  -2  16   2  224.48   16.80
  -2  16   2  258.77   25.30
   2  16  -2  240.38   15.30
   2  16  -2  213.68   15.40
   1 -16  -2 1281.77   43.70
  -1 -16   2 1249.88   42.50
  -1  16   2 1280.07   54.59
   1  16  -2 1243.78   44.00
  -1  16   2 1330.27   45.90
   0 -16  -2  254.77   15.80
   0  16   2  243.68   21.90
   0  16  -2  212.28   14.30
   0  16   2  251.77   15.40
  -1 -16  -2 1173.48   41.00
   1  16   2 1173.18   49.60
  -1  16  -2 1228.48   42.00
   1  16   2 1176.08   40.90
  -1  16  -2 1170.28   42.20
   2 -16   2  570.04   25.40
  -2 -16  -2  567.44   24.50
   2  16   2  557.14   30.50
  -2  16  -2  538.85   25.50
   2  16   2  557.44   24.10
  -2  16  -2  576.74   27.00
  -3 -16  -2  363.36   19.30
   3 -16   2  359.66   23.00
   3  16   2  332.57   25.30
   3  16   2  363.46   18.90
  -3  16  -2  345.17   21.30
  -3  16  -2  327.57   21.70
   4 -16   2  314.87   24.70
  -4 -16  -2  336.17   19.00
  -4  16  -2  313.57   21.60
   4  16   2  356.16   19.20
   4  16   2  325.57   26.40
  -4  16  -2  316.47   22.00
   5 -16   2   54.59   16.20
   5  16   2   62.29   10.80
   5  16   2   77.69   18.70
  -5  16  -2   62.09   14.10
  -5  16  -2   55.29   12.40
   6 -16   2   66.69   19.10
   6  16   2   76.39   20.70
  -6  16  -2  121.49   16.40
  -7  16  -2 1105.39   46.50
   7  16   2 1046.50   60.89
   8  16   2    9.70   19.00
   8 -17  -2  154.08   23.70
   8  17  -2  143.49   28.40
  -8  17   2  113.59   29.70
   8  17  -2  124.59   18.90
   7 -17  -2   50.09   11.80
   7 -17  -2   40.70   15.10
  -7  17   2   68.49   24.10
   7  17  -2   52.89   13.60
   7  17  -2   48.10   19.40
   6 -17  -2  266.87   20.00
   6  17  -2  249.58   22.60
  -6  17   2  268.17   28.00
   6  17  -2  261.47   29.80
  -6  17   2  242.08   33.80
   5 -17  -2  257.17   18.70
   5  17  -2  290.27   20.70
  -5  17   2  264.97   32.10
   5  17  -2  293.27   25.60
  -5  17   2  256.07   25.60
  -4 -17   2    4.60    5.50
   4 -17  -2   11.00    7.10
  -4  17   2    0.00    7.90
   4  17  -2    3.70   10.20
  -4  17   2    1.00   15.50
   4  17  -2    0.00    6.40
  -3 -17   2  516.55   21.70
   3 -17  -2  519.95   24.80
  -3  17   2  476.75   33.70
   3  17  -2  475.15   26.50
  -3  17   2  498.05   27.70
   3  17  -2  462.25   24.60
  -2 -17   2  384.16   19.30
   2 -17  -2  398.36   21.10
  -2  17   2  381.96   30.00
  -2  17   2  403.76   23.40
   2  17  -2  374.76   20.30
   2  17  -2  409.56   20.50
   1 -17  -2    8.10    5.40
  -1 -17   2    0.80    5.50
  -1  17   2   21.50   12.60
  -1  17   2    5.30    6.30
   1  17  -2    0.00    4.60
   0 -17  -2  514.55   23.80
   0  17   2  513.15   30.70
   0  17   2  497.35   23.30
   0  17  -2  493.55   23.00
  -1 -17  -2  147.89   14.10
   1  17   2  145.59   17.40
  -1  17  -2  137.19   12.90
  -1  17  -2   90.49   11.90
   1  17   2  140.69   13.00
   2 -17   2 1086.59   42.40
  -2 -17  -2 1139.49   39.90
   2  17   2 1108.19   39.80
  -2  17  -2 1096.49   41.90
   2  17   2 1094.39   48.50
  -2  17  -2 1161.08   42.60
  -3 -17  -2  522.75   24.20
   3 -17   2  457.75   27.00
   3  17   2  494.65   30.50
   3  17   2  517.25   23.60
  -3  17  -2  520.15   26.80
  -3  17  -2  524.65   26.60
  -4 -17  -2    1.30    6.00
   4  17   2    3.20    6.00
   4  17   2    0.00   10.10
  -4  17  -2    5.80    8.20
  -4  17  -2    0.00    7.00
   5  17   2   48.20   10.10
  -5  17  -2   40.20   11.50
  -5  17  -2   24.90   10.30
   5  17   2   46.00   16.30
  -6  17  -2  385.26   25.50
   6  17   2  323.17   31.30
  -7  17  -2   13.70   10.90
   8 -18  -2   73.99   19.50
  -8  18   2   89.89   28.50
   8  18  -2   75.79   23.90
   8  18  -2   72.39   15.80
   7 -18  -2  371.46   24.50
   7  18  -2  335.07   25.10
   7  18  -2  358.36   38.40
  -7  18   2  388.16   42.30
   6 -18  -2   82.19   13.10
  -6  18   2   57.59   16.90
   6  18  -2   91.29   14.70
   6  18  -2   89.29   19.90
  -6  18   2   72.89   23.70
   5 -18  -2   57.69   11.40
  -5  18   2   44.80   19.40
   5  18  -2   66.79   17.00
   5  18  -2   68.99   12.90
  -5  18   2   40.60   14.00
  -4 -18   2   11.50    6.20
   4 -18  -2    6.70    7.10
  -4  18   2    7.30    9.00
  -4  18   2   16.90   16.70
   4  18  -2    1.00    6.80
   4  18  -2    0.00   10.40
  -3 -18   2    0.00    5.30
   3 -18  -2    0.00    6.10
  -3  18   2    0.00   14.20
   3  18  -2    0.00    7.50
   3  18  -2    0.00    5.40
  -3  18   2    0.00    7.50
   2 -18  -2  300.27   19.30
  -2 -18   2  323.57   18.10
  -2  18   2  346.17   28.30
  -2  18   2  318.67   20.60
   2  18  -2  331.87   19.60
   2  18  -2  368.96   18.90
  -1 -18   2  339.37   19.00
  -1  18   2  315.47   28.30
   1  18  -2  344.67   19.00
  -1  18   2  333.97   19.90
   0 -18   2    7.60    6.40
   0 -18  -2    4.50    5.70
   0  18   2    2.10    5.90
   0  18   2    0.00   11.20
   0  18  -2    3.50    5.40
  -1 -18  -2    6.90    6.00
   1  18   2    0.00    5.60
   1  18   2   15.00   11.00
  -1  18  -2    8.20    6.30
  -1  18  -2    2.40    6.90
  -2 -18  -2  166.28   15.20
   2  18   2  194.88   14.30
  -2  18  -2  165.18   16.80
   2  18   2  162.38   19.10
  -2  18  -2  160.58   16.20
  -3 -18  -2   79.99   11.10
   3  18   2   98.69   11.90
  -3  18  -2   96.19   13.80
  -3  18  -2   61.99   11.50
   3  18   2   88.39   16.10
  -4 -18  -2  188.78   16.70
   4  18   2  155.98   15.30
   4  18   2  157.58   21.70
  -4  18  -2  143.69   16.60
  -4  18  -2  197.78   19.90
   5  18   2  175.18   24.30
  -5  18  -2  138.39   17.20
   5  18   2  149.79   15.60
  -5  18  -2  140.99   18.80
  -6  18  -2    4.20    9.40
   6  18   2   38.00   16.70
   7  18   2   32.20   19.50
  -7  18  -2   16.90   11.70
   8 -19  -2    0.00   12.30
   8  19  -2    0.00    8.60
   8  19  -2   10.20   19.60
   7 -19  -2   73.59   14.00
   7  19  -2   99.09   23.10
  -7  19   2   52.89   23.90
   7  19  -2   67.79   14.70
   6 -19  -2   22.80   10.00
   6  19  -2   43.70   17.80
  -6  19   2   58.79   23.70
   6  19  -2   50.69   11.90
  -6  19   2   60.39   16.00
   5 -19  -2  375.06   23.30
  -5  19   2  368.66   34.20
  -5  19   2  338.77   30.40
   5  19  -2  384.26   24.30
   5  19  -2  346.77   28.70
   4 -19  -2   42.20   10.20
  -4 -19   2   37.70    8.00
   4  19  -2   32.00   10.00
  -4  19   2   29.20   16.60
   4  19  -2   39.70   12.60
  -4  19   2   57.09   12.30
   3 -19  -2   16.40    7.90
  -3 -19   2   14.20    6.90
  -3  19   2   10.80    9.20
   3  19  -2   15.30    7.40
  -3  19   2   22.10   16.30
   3  19  -2   20.00    9.00
   2 -19  -2   23.50    8.30
  -2 -19   2   39.60    8.50
  -2  19   2   25.10   15.50
   2  19  -2   23.00    7.70
  -2  19   2   24.30    8.50
   1 -19  -2    0.00    5.90
  -1 -19   2   12.10    6.80
  -1  19   2    1.10    6.40
   1  19  -2   12.80    6.30
  -1  19   2   11.20   14.20
   0 -19   2 1122.69   41.30
   0 -19  -2 1085.49   40.60
   0  19  -2 1124.49   41.40
   0  19   2 1102.09   41.70
   0  19   2 1091.59   49.99
  -1 -19  -2  867.21   33.90
  -1  19  -2  849.22   34.50
   1  19   2  830.12   40.80
   1  19   2  810.32   33.20
  -2 -19  -2   74.99   11.40
   2  19   2   75.29   10.80
  -2  19  -2   80.99   12.80
  -2  19  -2   66.99   11.90
   2  19   2   77.59   15.40
  -3 -19  -2   45.90    9.40
  -3  19  -2   46.70   11.30
   3  19   2   32.50    8.50
   3  19   2   31.80   12.90
  -3  19  -2   29.10   10.10
  -4 -19  -2   35.70    9.10
   4  19   2   60.59   15.50
   4  19   2   40.90    9.60
  -4  19  -2   43.50   11.10
  -4  19  -2   23.10   10.30
   5  19   2  177.08   24.70
  -5  19  -2  198.98   22.10
  -5  19  -2  179.18   19.90
   5  19   2  174.68   17.40
   6  19   2  459.95   36.50
  -6  19  -2  419.36   27.90
  -7  19  -2   20.70   11.70
   7  19   2   11.70   17.70
   8 -20  -2   31.50   16.20
   8  20  -2    1.70   11.80
   8  20  -2   12.00   19.10
   7 -20  -2   53.39   13.00
  -7  20   2   63.99   19.20
   7  20  -2   81.99   16.20
   7  20  -2   87.09   23.10
   6 -20  -2  381.06   24.90
  -6  20   2  384.76   41.30
   6  20  -2  431.46   27.10
   6  20  -2  385.76   32.70
  -6  20   2  372.46   33.90
   5 -20  -2  206.88   19.70
  -5  20   2  211.58   24.60
  -5  20   2  245.28   31.70
   5  20  -2  234.38   21.50
   5  20  -2  189.08   23.90
   4 -20  -2  657.43   31.20
  -4  20   2  680.33   42.10
   4  20  -2  650.23   31.00
  -4  20   2  589.84   34.10
   4  20  -2  641.14   34.70
  -3 -20   2   23.40    7.90
   3 -20  -2   31.20    9.20
  -3  20   2    9.20   16.10
  -3  20   2   19.20    8.80
   3  20  -2   11.00    8.10
  -2 -20   2   63.69   10.10
   2 -20  -2   39.20   10.00
  -2  20   2   57.49   11.50
   2  20  -2   63.19   10.50
  -2  20   2   59.19   18.00
  -1 -20   2  361.36   20.80
   1 -20  -2  371.56   21.40
  -1  20   2  325.07   29.70
  -1  20   2  351.66   22.20
   1  20  -2  409.16   21.70
   0 -20   2    2.60    6.40
   0 -20  -2    0.10    6.00
   0  20   2   15.20   13.00
   0  20  -2    0.00    5.30
   0  20   2    0.00    6.10
   1 -20   2 1157.08   43.50
  -1 -20  -2 1048.70   40.80
  -1  20  -2 1139.79   42.80
   1  20   2 1073.89   49.30
   1  20   2 1118.19   41.80
  -2 -20  -2  709.13   30.70
  -2  20  -2  720.13   33.00
  -2  20  -2  694.83   32.90
   2  20   2  758.42   31.20
   2  20   2  657.23   37.10
  -3 -20  -2   94.99   12.40
   3  20   2  102.19   17.10
   3  20   2   79.79   11.90
  -3  20  -2   75.39   13.20
  -3  20  -2  110.39   15.40
  -4 -20  -2  468.45   24.10
  -4  20  -2  427.26   27.00
   4  20   2  420.16   31.10
  -4  20  -2  443.86   27.00
   4  20   2  427.56   23.30
   5  20   2  137.09   22.20
   5  20   2  133.39   15.30
  -5  20  -2  109.39   16.60
  -5  20  -2  114.59   17.90
   6  20   2   50.69   18.70
  -6  20  -2    6.80   10.50
   7  20   2  295.57   36.60
  -7  20  -2  254.67   26.00
   7 -21  -2    0.00    8.50
  -7  21   2    7.30   14.40
   7  21  -2    0.00    8.70
   6 -21  -2  152.98   18.40
  -6  21   2  147.29   22.60
   6  21  -2  186.68   20.10
   5 -21  -2  271.67   20.50
   5  21  -2  224.18   21.50
  -5  21   2  235.18   25.90
   4 -21  -2    0.00    7.40
   4  21  -2    8.10    7.90
  -4  21   2   12.50   17.50
  -4  21   2    0.00    8.60
   3 -21  -2  686.03   32.00
  -3 -21   2  711.43   29.30
  -3  21   2  694.83   41.60
   3  21  -2  687.73   32.00
  -3  21   2  638.14   33.60
   2 -21  -2  406.56   23.30
  -2 -21   2  413.76   22.00
  -2  21   2  341.97   31.10
  -2  21   2  419.66   25.30
   2  21  -2  415.76   22.60
   1 -21  -2  104.69   13.30
  -1 -21   2  126.59   14.10
  -1  21   2  104.69   14.70
  -1  21   2  120.99   20.90
   1  21  -2  118.79   13.50
   0 -21   2  479.75   25.50
   0 -21  -2  499.25   25.20
   0  21   2  467.95   25.30
   0  21   2  447.26   31.40
   0  21  -2  506.75   25.50
  -1 -21  -2    3.70    7.00
   1 -21   2    7.00    7.50
   1  21   2   14.60    7.60
  -1  21  -2   15.20    7.50
   1  21   2   10.70   11.80
  -2 -21  -2  318.27   20.20
   2  21   2  318.87   19.80
  -2  21  -2  306.37   21.40
   2  21   2  321.57   25.50
  -3 -21  -2  482.35   24.90
  -3  21  -2  481.45   27.40
   3  21   2  478.55   24.60
   3  21   2  416.56   29.80
  -3  21  -2  458.25   27.20
  -4 -21  -2   45.30   10.50
   4  21   2   65.59   16.70
  -4  21  -2   63.49   14.20
   4  21   2   67.79   11.80
  -4  21  -2  102.69   15.60
  -5  21  -2  141.29   18.50
   5  21   2  183.38   18.10
   5  21   2  158.98   23.90
  -5  21  -2  191.78   22.60
  -6  21  -2  133.59   19.50
   6  21   2  122.79   24.00
  -7  21  -2   21.20   13.40
   7  21   2   34.60   18.70
   7 -22  -2  398.46   27.60
   7  22  -2  445.16   29.00
  -7  22   2  357.56   35.90
   6 -22  -2    0.00    9.10
   6  22  -2   15.70   10.40
  -6  22   2    4.30   13.40
   5 -22  -2   20.20   10.00
   5  22  -2   24.60   10.40
  -5  22   2    0.00   10.80
   4 -22  -2    0.00    7.30
   4  22  -2    0.80    6.60
  -4  22   2    5.20    9.00
   3 -22  -2    7.10    7.30
  -3 -22   2   11.50    7.20
   3  22  -2    7.30    7.30
  -3  22   2   12.80    8.60
  -2 -22   2  199.28   17.30
   2 -22  -2  185.18   17.90
   2  22  -2  199.58   18.50
  -2  22   2  167.28   18.80
   1 -22  -2  102.39   13.80
  -1 -22   2  118.09   14.10
  -1  22   2  108.69   14.80
  -1  22   2  106.09   21.10
   1  22  -2   82.79   12.30
   0 -22  -2    3.90    7.20
   0 -22   2   18.60    8.60
   0  22   2    1.30    7.00
   0  22   2   16.50   14.60
   0  22  -2   16.30    7.80
   1 -22   2   32.70   10.40
  -1 -22  -2   31.30    8.80
   1  22   2   32.10    9.50
  -1  22  -2   38.70    9.50
   1  22   2   29.50   13.30
   2 -22   2    4.90    7.90
  -2 -22  -2    8.20    7.30
   2  22   2    0.00    6.70
   2  22   2    0.00   10.80
  -2  22  -2    0.00    7.40
  -3 -22  -2   27.50    9.20
   3  22   2   30.60   12.80
  -3  22  -2   17.60    9.90
   3  22   2   28.50    9.10
  -4 -22  -2  323.97   20.90
   4  22   2  289.07   20.10
  -4  22  -2  300.67   24.20
   4  22   2  314.67   27.80
  -4  22  -2  241.18   23.30
   5  22   2   47.70   17.70
  -5  22  -2   42.00   14.60
   5  22   2   71.19   12.70
  -5  22  -2   57.39   14.60
   6  22   2   21.80   15.60
   7 -23  -2   26.20   12.30
   7  23  -2   54.79   14.50
  -7  23   2   20.10   17.60
   6 -23  -2   85.09   15.60
  -6  23   2   75.49   19.70
   6  23  -2   77.69   15.40
   5 -23  -2  116.29   16.30
   5  23  -2  124.99   16.30
  -5  23   2  147.69   22.00
   4 -23  -2    0.00    6.90
   4  23  -2    0.00    6.20
  -4  23   2    0.00    9.30
   3 -23  -2   19.60    8.90
  -3 -23   2   16.70    8.30
  -3  23   2   16.50    9.80
   3  23  -2   13.60    6.60
   2 -23  -2   21.40    8.60
  -2 -23   2   13.50    7.50
   2  23  -2   16.50    8.30
  -2  23   2    5.10    8.50
   1 -23  -2    0.00    6.90
  -1 -23   2    5.80    7.40
  -1  23   2    4.10    7.90
   1  23  -2    2.40    6.70
   0 -23   2  263.87   19.10
   0 -23  -2  252.37   18.70
   0  23  -2  266.67   19.50
   0  23   2  262.07   19.20
   1 -23   2  420.76   25.50
  -1 -23  -2  442.56   24.60
  -1  23  -2  421.26   25.00
   1  23   2  432.06   23.70
   1  23   2  423.26   29.90
   2 -23   2   12.80    9.20
  -2 -23  -2    0.00    7.00
  -2  23  -2    1.10    7.00
   2  23   2   20.50    8.80
   2  23   2   25.60   13.30
  -3 -23  -2    0.00    6.50
   3 -23   2    0.00    7.30
   3  23   2    0.00    7.00
  -3  23  -2    6.00    8.80
   3  23   2    0.00   11.20
  -4 -23  -2   94.89   13.70
   4  23   2   85.29   13.50
   4  23   2   87.99   18.50
  -4  23  -2   76.59   15.30
   5  23   2   30.30   17.10
  -5  23  -2   54.69   14.90
   5  23   2   44.20   11.60
   6  23   2  115.39   24.40
   7 -24  -2   67.19   15.80
  -7  24   2   92.09   23.20
   7  24  -2   90.99   17.20
   6 -24  -2   15.00   10.80
   6  24  -2   45.10   13.40
  -6  24   2   35.00   16.70
   5 -24  -2  176.18   20.00
  -5  24   2  156.58   23.00
   5  24  -2  206.48   21.30
   4 -24  -2  626.44   32.50
   4  24  -2  689.23   33.20
  -4  24   2  614.74   36.50
   3 -24  -2  170.68   18.40
  -3 -24   2  184.78   17.20
   3  24  -2  183.08   18.90
  -3  24   2  151.78   20.00
  -2 -24   2  287.67   19.90
   2 -24  -2  293.17   21.10
  -2  24   2  267.37   24.40
   2  24  -2  264.67   19.20
   1 -24  -2  154.38   16.80
  -1 -24   2  154.08   16.80
  -1  24   2  161.98   18.10
   1  24  -2  175.88   18.10
   0 -24   2    3.70    7.40
   0 -24  -2    0.40    7.00
   0  24  -2    0.00    7.00
   0  24   2    6.00    8.00
  -1 -24  -2  489.95   26.50
   1 -24   2  474.75   27.50
  -1  24  -2  501.85   27.70
   1  24   2  467.15   25.90
   2 -24   2  514.45   29.00
  -2 -24  -2  462.95   26.30
   2  24   2  497.05   26.60
  -2  24  -2  502.85   29.10
  -3 -24  -2   19.40    9.30
   3 -24   2    9.00    8.80
   3  24   2    5.70    8.10
  -3  24  -2   11.80    9.90
   4 -24   2  226.78   23.40
  -4 -24  -2  264.87   22.30
   4  24   2  276.67   28.40
  -4  24  -2  257.77   25.80
   4  24   2  253.87   22.40
   5 -24   2  101.29   17.20
   5  24   2   93.29   21.20
  -5  24  -2   80.99   17.80
   5  24   2  107.59   15.80
   6 -24   2    8.80    9.30
   6  24   2   22.20   18.40
   6 -25  -2   89.29   16.10
  -6  25   2  107.09   21.40
   6  25  -2  119.99   18.10
   5 -25  -2  255.17   24.30
   5  25  -2  257.77   24.20
  -5  25   2  275.07   29.10
   4 -25  -2   14.80    9.60
   4  25  -2   24.60    9.80
  -4  25   2   20.70   11.70
   3 -25  -2  469.25   28.20
  -3 -25   2  590.64   27.90
  -3  25   2  571.94   32.70
   3  25  -2  512.45   29.00
   2 -25  -2  444.16   26.70
  -2 -25   2  491.45   25.80
   2  25  -2  491.75   26.80
  -2  25   2  382.56   27.20
   1 -25  -2  193.58   19.50
  -1 -25   2  238.38   20.70
   1  25  -2  218.48   20.50
  -1  25   2  215.78   21.60
   0 -25  -2  139.49   16.30
   0 -25   2  134.19   16.00
   0  25  -2  121.79   15.50
   0  25   2  114.49   16.50
  -1 -25  -2   54.99   11.80
   1 -25   2   67.09   13.20
   1  25   2   88.29   13.80
  -1  25  -2   72.29   13.70
   2 -25   2   81.49   14.50
  -2 -25  -2   53.59   11.70
   2  25   2   57.59   11.90
  -2  25  -2   50.59   12.80
  -3 -25  -2  981.60   40.00
   3 -25   2  892.61   42.00
  -3  25  -2  885.51   42.70
   3  25   2  911.51   39.70
   4 -25   2   37.90   12.70
   4  25   2   44.90   11.80
  -4  25  -2   44.90   14.30
   5 -25   2  408.46   29.90
  -5  25  -2  516.55   34.50
   5  25   2  511.75   29.10
   6 -25   2  179.18   23.20
   6 -26  -2   16.00   11.60
   6  26  -2    9.90   11.00
  -6  26   2    6.80   15.20
   5 -26  -2    4.70   10.10
   5  26  -2   14.70    9.70
  -5  26   2    0.00   13.00
   4 -26  -2   57.89   13.00
   4  26  -2   51.49   12.10
  -4  26   2   48.80   15.00
   3 -26  -2   19.00   10.20
  -3 -26   2   30.40   10.50
   3  26  -2   11.10    9.10
  -3  26   2   26.70   12.90
   2 -26  -2  360.86   24.30
  -2 -26   2  377.26   23.60
   2  26  -2  341.97   23.40
  -2  26   2  372.66   26.40
  -1 -26   2   51.39   11.80
   1 -26  -2   57.89   12.10
  -1  26   2   55.89   13.40
   1  26  -2   52.49   12.20
   0 -26   2   29.50   10.00
   0 -26  -2   40.50   10.80
   0  26  -2   37.80   11.20
   0  26   2   39.70   10.80
   1 -26   2    0.00    7.60
  -1 -26  -2    0.00    6.80
  -1  26  -2   11.50    8.80
   1  26   2    0.00    7.10
  -2 -26  -2   49.00   11.80
   2 -26   2   38.60   11.60
  -2  26  -2   37.00   12.60
   2  26   2   60.39   12.60
  -3 -26  -2    5.70    8.30
   3 -26   2    0.00    8.50
  -3  26  -2    1.30    9.40
   3  26   2    0.40    8.20
   4 -26   2  351.56   26.50
  -4  26  -2  295.07   28.10
   4  26   2  286.47   22.50
   5 -26   2    6.00   11.10
  -5  26  -2    0.00   11.60
   5  26   2    0.00    8.70
   6 -27  -2    5.80   11.20
  -6  27   2    0.00   14.10
   6  27  -2    0.00    9.60
   5 -27  -2   24.10   11.70
  -5  27   2   16.60   14.10
   5  27  -2    9.70    9.90
   4 -27  -2    5.90    9.10
  -4  27   2   12.80   11.40
   4  27  -2    0.00    8.30
  -3 -27   2    0.00    7.20
   3 -27  -2    1.90    8.60
   3  27  -2    3.40    8.70
  -3  27   2    0.00   10.00
   2 -27  -2    2.20    8.60
  -2 -27   2    4.40    8.40
  -2  27   2    1.00   10.10
   2  27  -2    0.00    7.30
  -1 -27   2    3.60    8.80
   1 -27  -2   10.90    8.90
   1  27  -2    3.50    8.90
  -1  27   2   12.20    9.10
   0 -27   2   57.29   12.40
   0 -27  -2   45.80   11.80
   0  27   2   49.40   12.60
   0  27  -2   36.80   11.00
   1 -27   2   22.50   10.80
  -1 -27  -2   28.50   10.50
   1  27   2   25.40   10.80
  -1  27  -2   64.89   12.90
  -2 -27  -2    0.00    8.50
   2 -27   2   14.30   10.40
  -2  27  -2   26.60   10.80
   2  27   2   15.00    8.60
  -3 -27  -2   11.60    9.90
   3 -27   2    6.80   10.10
   3  27   2    0.00    8.90
  -3  27  -2    3.40   10.10
   4 -27   2   80.89   16.80
   4  27   2  126.99   17.50
  -4  27  -2   92.29   19.00
   5 -27   2   26.70   13.70
   5  27   2   46.50   13.70
  -5  27  -2   39.70   17.00
   5 -28  -2  141.99   19.50
  -5  28   2   81.69   20.10
   5  28  -2  148.49   19.90
   4 -28  -2  538.85   32.90
   4  28  -2  601.24   33.10
  -4  28   2  624.14   38.60
  -3 -28   2  479.45   27.00
   3 -28  -2  412.66   28.00
   3  28  -2  426.06   27.40
  -3  28   2  398.56   30.40
  -2 -28   2  165.98   18.40
   2 -28  -2  151.38   19.30
   2  28  -2  164.08   18.80
  -2  28   2  171.48   21.10
   1 -28  -2  213.38   21.60
  -1 -28   2  225.18   21.20
   1  28  -2  210.88   21.70
  -1  28   2  203.48   22.50
   0 -28   2    0.00    8.40
   0 -28  -2    0.00    8.50
   0  28  -2    0.00    8.00
   0  28   2    9.20    9.40
  -1 -28  -2  244.88   23.00
   1 -28   2  194.88   21.10
  -1  28  -2  210.38   21.80
   1  28   2  212.28   21.80
  -2 -28  -2  337.57   24.70
   2 -28   2  331.47   28.40
  -2  28  -2  341.57   26.00
   2  28   2  340.87   24.50
   3 -28   2    0.00    9.40
  -3 -28  -2   25.20   10.90
  -3  28  -2    0.10   11.00
   3  28   2    7.60    9.40
   4 -28   2  276.67   26.90
  -4  28  -2  280.77   29.20
   4  28   2  307.27   23.80
   5 -28   2   68.19   17.00
   5  28   2   74.59   16.40
  -5  28  -2   91.19   20.30
   5 -29  -2  111.59   18.50
   5  29  -2   87.59   16.70
  -5  29   2  113.69   22.10
   4 -29  -2   53.69   13.80
  -4  29   2   52.79   15.90
   4  29  -2   27.70   11.60
   3 -29  -2  258.87   25.00
  -3 -29   2  284.07   23.90
   3  29  -2  287.27   23.10
  -3  29   2  253.37   27.70
   2 -29  -2  152.08   19.20
  -2 -29   2  153.08   18.20
   2  29  -2  138.89   18.40
  -2  29   2   91.09   17.10
   1 -29  -2  220.58   23.00
  -1 -29   2  180.18   19.80
  -1  29   2  180.58   21.90
   1  29  -2  156.98   19.70
   0 -29  -2  362.26   25.20
   0 -29   2  354.46   25.20
   0  29  -2  351.66   25.60
   0  29   2  339.07   25.70
   1 -29   2  129.69   17.70
  -1 -29  -2  141.49   18.20
   1  29   2  161.78   19.30
  -1  29  -2  133.09   18.60
  -2 -29  -2    8.50    9.40
   2 -29   2   12.20   10.90
   2  29   2    7.50    9.80
  -2  29  -2   13.40   11.90
  -3 -29  -2  448.56   28.40
   3 -29   2  398.96   29.00
  -3  29  -2  426.36   31.30
   3  29   2  487.75   28.70
   4 -29   2   23.90   11.70
  -4  29  -2    0.00   12.80
   4  29   2    0.00    8.60
   4 -30  -2   69.79   15.80
   4  30  -2   73.89   15.90
  -4  30   2  142.99   22.40
   3 -30  -2    4.90    9.70
  -3  30   2    0.00   11.80
   3  30  -2    0.00    8.20
   2 -30  -2  170.98   21.00
  -2 -30   2  161.98   19.30
   2  30  -2  166.68   20.40
  -2  30   2  144.39   21.20
  -1 -30   2   77.49   15.00
   1 -30  -2   78.99   15.30
   1  30  -2   73.69   14.80
  -1  30   2   55.59   14.20
   0 -30   2   33.60   12.60
   0 -30  -2    2.30    9.90
   0  30   2   18.90   11.50
   0  30  -2   10.90   10.10
   1 -30   2   62.29   13.80
  -1 -30  -2   29.90   11.80
  -1  30  -2   48.10   13.90
   1  30   2   58.09   14.50
  -2 -30  -2   98.79   15.90
   2 -30   2   72.49   14.80
   2  30   2  117.09   17.50
  -2  30  -2   71.69   16.80
   3 -30   2    7.40   10.60
  -3 -30  -2    0.00    9.60
  -3  30  -2    0.00   11.60
   3  30   2    0.00    9.60
   4 -30   2  142.19   20.90
   4  30   2  114.19   19.30
  -4  30  -2  124.99   22.90
   4 -31  -2   16.30   11.60
  -4  31   2   32.60   16.20
   4  31  -2   33.50   12.10
   3 -31  -2    7.20    9.70
  -3  31   2    3.80   12.80
   3  31  -2   13.60   10.60
   2 -31  -2   11.60   10.40
  -2 -31   2    4.00   10.50
   2  31  -2    0.90    9.10
  -2  31   2    6.00   11.10
   1 -31  -2   52.99   14.10
  -1 -31   2   40.70   12.80
   1  31  -2   54.49   13.20
  -1  31   2   34.60   13.10
   0 -31   2   69.79   15.20
   0 -31  -2   72.59   15.20
   0  31   2   63.19   16.20
   0  31  -2   68.99   14.70
  -1 -31  -2    0.00    9.50
   1 -31   2    8.60   10.90
  -1  31  -2    0.00    9.90
   1  31   2    0.00    9.80
  -2 -31  -2   27.70   12.80
   2 -31   2   22.00   12.00
  -2  31  -2   26.60   13.30
   2  31   2   20.20   11.50
  -3 -31  -2    3.70   10.10
   3 -31   2    3.80   10.60
   3  31   2    0.70   10.50
  -3  31  -2    0.50   12.40
   3 -32  -2   56.99   15.10
  -3  32   2   52.09   17.80
   3  32  -2   47.80   14.10
  -2 -32   2   80.19   16.10
   2 -32  -2   75.59   16.20
  -2  32   2   64.79   16.60
   2  32  -2   67.89   15.60
  -1 -32   2   74.09   15.40
   1 -32  -2  116.69   18.40
  -1  32   2   95.79   18.00
   1  32  -2  125.89   19.20
   0 -32  -2   28.20   12.00
   0 -32   2   32.10   12.90
   0  32   2   42.80   13.50
   0  32  -2   45.70   14.30
   1 -32   2  103.89   18.20
  -1 -32  -2  120.39   18.90
  -1  32  -2  112.29   19.20
   1  32   2  129.19   20.20
   2 -32   2  280.27   27.60
  -2 -32  -2  340.17   29.00
  -2  32  -2  337.77   31.80
   2  32   2  339.47   30.40
   2 -33  -2   21.40   13.60
  -2 -33   2   44.60   14.50
   2  33  -2   56.69   14.90
  -2  33   2   48.90   17.00
  -1 -33   2  140.69   19.80
   1 -33  -2  121.79   18.90
  -1  33   2  118.59   19.60
   1  33  -2  141.69   20.70
   0 -33   2  394.96   28.80
   0 -33  -2  377.46   28.40
   0  33  -2  387.56   29.20
   0  33   2  373.66   29.80
  -1 -33  -2   63.09   16.20
   1 -33   2   82.19   16.60
   1  33   2   35.50   14.00
  -1  33  -2   87.99   18.20
   1  34  -2   72.69   16.50
   0 -34  -2    6.80   10.90
   0  34  -2    8.80   12.80
   0  34   2   13.80   12.30
   9   0  -3   38.70   21.70
   9   0  -3    0.00   12.70
   8   0  -3   33.80   14.80
  -7   0   3   61.69   19.00
   7   0  -3    1.00   10.20
   6   0  -3    0.00    8.40
  -6   0   3   11.20   15.70
  -5   0   3    0.00   12.20
   5   0  -3    0.60    2.50
   5   0  -3    1.50    8.50
   4   0  -3    0.00    7.00
  -4   0   3   22.80   13.40
   4   0  -3    2.60    2.30
   4   0  -3    3.40    2.50
  -3   0   3   44.30   12.40
   3   0  -3    0.00    6.80
   3   0  -3    0.00    2.50
   2   0  -3    0.00    3.30
  -2   0   3   17.80   10.90
   2   0  -3    0.00    6.20
   1   0  -3    0.00    3.70
  -1   0   3   15.30    9.70
   1   0  -3    1.50    5.40
   0   0  -3    3.60    4.50
   0   0  -3    2.90    3.90
   0   0   3    0.00    7.00
   0   0   3    0.00    3.70
   1   0   3    0.00    5.70
  -1   0  -3    0.00    4.70
  -2   0  -3    3.30    5.10
   2   0   3   12.90    7.20
   3   0   3    0.00    3.10
   3   0   3   19.80    9.10
   3   0   3    0.00    3.60
  -3   0  -3    0.00    5.30
  -4   0  -3    0.00    5.40
   4   0   3   21.00   11.00
  -5   0  -3    4.10    6.40
   5   0   3    3.60   11.00
  -6   0  -3    9.10    7.90
   6   0   3   34.50   15.30
   7   0   3   57.19   19.90
   8   0   3    7.80   17.30
   9  -1  -3  216.68   33.50
   9  -1  -3  130.79   21.40
   9   1  -3   45.70   22.50
   9   1  -3   52.99   16.20
   8  -1  -3  564.04   34.90
   8   1  -3  597.84   35.20
  -7  -1   3  382.46   35.80
   7  -1  -3  470.95   29.70
   7   1  -3  469.65   29.10
  -7   1   3  389.46   36.30
  -6  -1   3   32.50   16.80
   6  -1  -3    0.00    8.40
   6   1  -3   12.50    9.90
  -6   1   3   64.09   18.60
   5  -1  -3  213.88    9.60
   5  -1  -3  184.58   19.40
  -5  -1   3  183.98   24.30
   5   1  -3  196.78   19.70
  -5   1   3  217.68   26.60
   4  -1  -3  932.31   39.50
   4  -1  -3  979.60   28.00
  -4  -1   3  961.20   47.20
   4   1  -3  988.40   39.40
  -4   1   3  984.40   48.10
   3  -1  -3  776.62   31.60
  -3  -1   3  738.33   21.40
  -3  -1   3  746.43   38.10
   3  -1  -3  755.82   22.90
   3   1  -3  732.43   31.00
  -3   1   3  773.32   38.90
   3   1  -3  804.72   22.20
   2  -1  -3 1655.93   45.10
   2  -1  -3 1623.84   52.19
  -2  -1   3 1617.94   62.39
   2   1  -3 1559.74   51.59
  -2   1   3 1659.33   62.89
   2   1  -3 1612.94   44.50
  -1  -1   3  714.73   32.10
   1  -1  -3  685.33   23.30
   1  -1  -3  722.43   26.10
  -1   1   3  711.33   32.90
   1   1  -3  744.33   26.00
   1   1  -3  705.93   23.40
   0  -1  -3  522.15   17.80
   0  -1   3  486.85   23.20
   0  -1  -3  451.65   18.70
   0   1   3  522.05   24.30
   0   1  -3  489.85   17.10
   0   1  -3  464.25   18.90
   1  -1   3  671.53   28.50
  -1  -1  -3  651.43   24.70
   1   1   3  714.13   29.40
  -1   1  -3  656.23   25.00
   2  -1   3  648.74   29.20
  -2  -1  -3  585.94   24.40
   2   1   3  652.83   29.90
  -2   1  -3  581.84   24.30
   3  -1   3  584.24   29.00
  -3  -1  -3  509.75   22.70
   3  -1   3  468.25   17.80
   3   1   3  564.84   29.20
   3   1   3  479.25   17.00
  -3   1  -3  498.55   23.10
   4  -1   3  398.86   17.10
  -4  -1  -3  425.56   21.30
   4  -1   3  411.76   27.80
  -4   1  -3  400.66   21.00
   4   1   3  388.76   27.30
   4   1   3  399.46   16.50
  -5  -1  -3   16.50    7.40
   5  -1   3    5.00   11.40
  -5   1  -3    3.50    6.80
   5   1   3    2.70   11.50
   6  -1   3  119.09   21.80
  -6  -1  -3  111.49   13.50
  -6   1  -3  108.19   14.00
   6   1   3   98.39   21.20
   7  -1   3  294.37   33.70
   7   1   3  311.27   35.90
   8  -1   3  229.68   32.90
   8   1   3   30.20   19.80
   9  -2  -3  717.23   53.99
   9  -2  -3  924.11   46.00
   9   2  -3  873.31   44.60
   9   2  -3  724.33   54.59
   8  -2  -3  125.89   20.80
   8   2  -3  150.88   20.90
  -8   2   3  151.68   28.20
   8   2  -3  162.58   28.50
   7  -2  -3   26.40   13.00
  -7  -2   3   63.59   20.50
  -7   2   3  110.99   23.10
   7   2  -3   44.60   13.20
   6  -2  -3  378.06   25.90
  -6  -2   3  322.57   34.10
   6   2  -3  407.26   25.70
  -6   2   3  344.57   33.00
   5  -2  -3  139.09   18.00
  -5  -2   3  151.38   22.40
   5  -2  -3  160.18    8.80
  -5   2   3  188.28   24.60
   5   2  -3  135.79   17.20
   4  -2  -3  561.24   29.00
  -4  -2   3  599.04   36.00
   4  -2  -3  609.24   19.20
  -4   2   3  597.24   35.90
   4   2  -3  546.35   27.50
  -3  -2   3 1780.42   70.89
   3  -2  -3 1883.61   49.99
   3  -2  -3 1822.62   59.89
  -3  -2   3 1676.33   47.10
   3   2  -3 1872.91   59.79
  -3   2   3 1864.21   72.49
   3   2  -3 1857.51   47.80
   2  -2  -3   30.60    8.10
  -2  -2   3   59.79   12.60
   2  -2  -3   36.60    5.20
   2   2  -3   29.30    7.50
  -2   2   3   72.29   13.60
   2   2  -3   39.30    4.70
   1  -2  -3 4292.77  117.69
  -1  -2   3 4218.88  140.69
   1  -2  -3 4203.28  110.79
  -1   2   3 4177.28  142.19
   1   2  -3 4156.68  116.99
   1   2  -3 4156.08  110.29
   0  -2  -3  920.91   29.40
   0  -2   3  934.51   36.20
   0  -2  -3  952.60   30.40
   0   2  -3  954.60   28.80
   0   2  -3  932.61   30.40
   0   2   3  966.20   38.20
   1  -2   3  806.12   24.30
  -1  -2  -3  848.22   29.20
   1  -2   3  847.52   33.60
  -1  -2  -3  866.91   23.50
   1   2   3  891.91   35.20
  -1   2  -3  866.11   23.90
  -1   2  -3  849.52   29.40
   1   2   3  797.12   24.20
  -2  -2  -3 4031.20  103.89
   2  -2   3 3894.01  131.89
  -2  -2  -3 3739.53  105.79
   2  -2   3 3673.23  103.19
   2   2   3 4001.20  133.09
  -2   2  -3 3835.92  106.59
   3  -2   3 1663.03   62.39
  -3  -2  -3 1559.44   49.70
   3  -2   3 1534.45   46.00
   3   2   3 1490.55   44.30
   3   2   3 1577.04   62.59
  -3   2  -3 1567.34   49.80
  -4  -2  -3  103.19   12.00
   4  -2   3   87.09    9.40
   4  -2   3  152.98   18.80
   4   2   3  123.79    9.30
  -4   2  -3  111.99   12.10
   4   2   3  114.99   17.70
  -5  -2  -3   51.99   10.20
   5  -2   3   61.19   15.70
   5   2   3   57.09   15.90
  -5   2  -3   40.20    9.70
  -6  -2  -3   15.90    8.20
   6  -2   3   60.39   17.20
   6   2   3   47.20   16.30
  -6   2  -3   17.00    8.50
   7  -2   3  353.86   33.90
   7   2   3  402.06   35.90
   8  -2   3  698.13   50.19
   8   2   3  713.33   50.89
   9  -3  -3   47.70   22.30
   9   3  -3  183.68   33.00
   9   3  -3  150.08   21.50
   8  -3  -3  322.97   30.20
   8   3  -3  270.77   36.20
   8   3  -3  374.16   27.70
  -8   3   3  362.76   40.90
   7  -3  -3  656.43   35.90
   7   3  -3  691.13   34.90
  -7   3   3  522.95   42.10
  -6  -3   3   14.50   15.40
   6  -3  -3   17.80   11.50
   6   3  -3   15.80   10.20
  -6   3   3   39.10   17.70
   5  -3  -3  684.43   33.90
  -5  -3   3  665.03   40.50
   5  -3  -3  682.13   22.50
  -5   3   3  661.43   40.90
   5   3  -3  689.23   32.30
   4  -3  -3   97.89    7.50
   4  -3  -3   76.89   13.20
  -4  -3   3   69.49   16.40
  -4   3   3  117.79   18.90
   4   3  -3   77.19   12.60
  -3  -3   3  597.94   32.70
   3  -3  -3  607.94   20.00
   3  -3  -3  607.04   28.00
   3   3  -3  594.84   27.10
  -3   3   3  631.74   34.60
   3   3  -3  585.14   17.00
   2  -3  -3 4130.29  118.89
  -2  -3   3 4072.19  141.29
   2  -3  -3 4250.97  109.19
  -2   3   3 4134.79  143.19
   2   3  -3 4066.69  118.19
   2   3  -3 4237.78  107.59
   1  -3  -3 3374.76   95.09
  -1  -3   3 3457.45  112.99
   1  -3  -3 3340.87   89.49
   1   3  -3 3204.08   94.09
  -1   3   3 3348.66  115.39
   1   3  -3 3286.07   88.69
   0  -3  -3  861.21   29.00
   0  -3   3  857.01   33.80
   0   3  -3  901.01   29.30
   0   3   3  926.01   28.50
   0   3  -3  861.91   27.30
   0   3   3  911.61   36.90
   1  -3   3 2637.84   90.19
  -1  -3  -3 2580.44   73.99
  -1  -3  -3 2629.04   71.49
   1  -3   3 2636.44   72.19
  -1   3  -3 2668.73   74.69
   1   3   3 2643.64   92.09
  -1   3  -3 2701.83   71.89
   1   3   3 2657.03   72.09
  -2  -3  -3   17.20    3.30
   2  -3   3   12.20    2.60
  -2  -3  -3   11.00    5.90
   2  -3   3    6.40    6.90
   2   3   3   15.50    8.00
  -2   3  -3   18.30    5.80
  -2   3  -3   14.60    3.80
  -3  -3  -3  681.73   27.20
   3  -3   3  733.73   34.10
   3  -3   3  673.03   23.40
   3   3   3  625.34   21.10
  -3   3  -3  651.83   27.10
   3   3   3  714.73   34.50
   4  -3   3  644.94   25.10
   4  -3   3  675.53   36.00
  -4  -3  -3  713.53   28.40
  -4   3  -3  654.53   28.30
   4   3   3  677.53   37.10
   4   3   3  652.83   23.10
  -5  -3  -3   10.90    7.10
   5  -3   3   13.20   12.30
   5   3   3    9.90   12.30
  -5   3  -3    5.50    7.00
  -6  -3  -3  430.46   23.10
   6  -3   3  347.07   31.50
  -6   3  -3  426.06   23.70
   6   3   3  408.76   33.20
   7  -3   3  272.57   33.60
   7   3   3  353.86   37.80
   8  -3   3   46.90   18.70
   8   3   3  201.18   31.10
   9  -4  -3    0.00   12.50
   9   4  -3   20.20   13.90
   9   4  -3   22.40   19.30
   8  -4  -3   51.09   15.30
   8   4  -3   68.19   15.70
  -8   4   3   60.89   22.30
   8   4  -3   97.39   24.50
   7  -4  -3    0.00   10.20
  -7   4   3   29.60   16.60
   7   4  -3   24.60   11.50
   6  -4  -3   23.70   11.80
  -6  -4   3   24.90   16.60
   6  -4  -3   33.20    6.10
   6   4  -3    5.30    9.10
  -6   4   3   34.80   17.90
   5  -4  -3  129.89    9.30
   5  -4  -3  112.89   16.20
  -5  -4   3  115.99   20.90
  -5   4   3  147.59   22.90
   5   4  -3  131.69   16.10
  -4  -4   3  123.09   19.10
   4  -4  -3  145.69   16.60
   4  -4  -3  175.08    9.80
   4   4  -3  194.48   17.20
  -4   4   3  185.98   22.80
   3  -4  -3  536.45   18.60
  -3  -4   3  533.85   30.80
   3  -4  -3  482.05   25.10
   3   4  -3  496.95   24.30
  -3   4   3  543.35   32.40
   2  -4  -3  878.01   32.60
  -2  -4   3  845.62   37.90
   2  -4  -3  873.11   27.40
  -2   4   3  897.41   40.90
   2   4  -3  812.22   31.20
   2   4  -3  877.61   25.70
  -1  -4   3  198.48   16.30
   1  -4  -3  183.48   10.70
  -1   4   3  208.08   13.90
   1   4  -3  174.38   10.40
  -1   4   3  188.28   17.70
   1   4  -3  177.68   11.60
   0  -4  -3 1527.95   45.10
   0  -4   3 1457.75   52.99
   0   4   3 1540.25   45.00
   0   4   3 1578.34   56.79
   0   4  -3 1483.85   44.80
   0   4  -3 1504.15   44.00
  -1  -4  -3 1255.57   40.50
   1  -4   3 1319.17   47.30
   1   4   3 1369.56   50.29
  -1   4  -3 1253.77   40.80
   1   4   3 1318.37   37.20
  -1   4  -3 1277.57   37.10
  -2  -4  -3   23.70    6.20
   2  -4   3   10.90    6.80
  -2   4  -3   16.50    6.10
   2   4   3   19.60    2.90
   2   4   3   13.10    8.20
  -2   4  -3   15.30    4.00
   3  -4   3    6.40    8.00
  -3  -4  -3    0.00    4.70
   3   4   3    0.00    2.90
  -3   4  -3    0.00    4.70
   3   4   3    0.00    8.10
  -4  -4  -3   82.99   11.10
   4  -4   3  110.99   16.20
   4  -4   3   78.59    9.10
  -4   4  -3   88.29   11.70
   4   4   3  117.69   17.50
   4   4   3   81.89    7.90
   5  -4   3   29.10   13.00
  -5  -4  -3   25.00    7.80
   5   4   3    0.90   12.00
  -5   4  -3   26.30    8.70
  -6  -4  -3   18.30    8.00
   6  -4   3   27.80   14.10
  -6   4  -3    1.90    7.50
   6   4   3   30.90   14.70
   7  -4   3   98.09   21.70
   7   4   3  108.69   23.60
   8  -4   3   21.70   16.60
   8   4   3   15.70   18.60
   9  -5  -3   45.80   15.90
   9   5  -3    0.00   11.30
   9   5  -3    5.70   19.50
   8  -5  -3  158.78   22.10
   8   5  -3  147.99   28.70
   8   5  -3  171.58   21.50
  -8   5   3  199.68   31.00
   7  -5  -3   73.59   16.30
   7   5  -3   90.29   22.40
  -7   5   3   67.19   22.00
   7   5  -3   70.39   14.40
  -6  -5   3   79.29   19.90
   6  -5  -3   64.49    8.10
   6  -5  -3   76.39   15.60
   6   5  -3   65.89   13.60
  -6   5   3   68.99   21.30
  -5  -5   3  230.88   26.80
   5  -5  -3  238.28   12.60
   5  -5  -3  263.27   23.30
  -5   5   3  261.27   29.10
   5   5  -3  245.08   18.80
   4  -5  -3  477.55   18.30
   4  -5  -3  495.45   26.80
  -4  -5   3  488.75   31.50
  -4   5   3  469.25   32.90
   4   5  -3  477.25   24.80
  -3  -5   3  349.27   11.70
   3  -5  -3  338.17   20.30
   3  -5  -3  361.96   15.00
  -3  -5   3  442.56   26.60
  -3   5   3  351.16   27.40
   3   5  -3  345.37   20.20
   3   5  -3  356.66   11.70
  -2  -5   3 2272.17   83.19
   2  -5  -3 2262.07   64.39
   2   5  -3 2315.37   70.29
   2   5  -3 2361.66   62.49
  -2   5   3 2236.58   71.59
  -2   5   3 2534.15   87.29
   1  -5  -3    0.00    3.80
  -1  -5   3    6.00    7.70
  -1   5   3   16.30   10.20
   1   5  -3    1.30    4.20
  -1   5   3    0.00    4.90
   1   5  -3    0.90    4.10
   0  -5  -3   12.20    4.90
   0  -5   3    0.00    5.50
   0   5   3   13.20    4.60
   0   5  -3   20.80    4.30
   0   5  -3    6.20    4.80
   0   5   3   13.90    8.40
   1  -5   3  862.81   33.10
  -1  -5  -3  874.01   29.90
  -1   5  -3  863.21   30.60
   1   5   3  880.01   26.50
  -1   5  -3  851.71   26.30
   1   5   3  864.61   36.30
   2  -5   3   16.40    6.90
  -2  -5  -3   19.10    6.00
   2   5   3   23.60    8.90
   2   5   3   20.10    3.20
  -2   5  -3   24.10    4.60
  -2   5  -3   13.50    6.40
   3  -5   3  948.21   39.90
  -3  -5  -3  890.01   32.00
   3   5   3  845.92   40.20
  -3   5  -3  833.82   30.00
   3   5   3  839.82   26.80
  -3   5  -3  852.51   32.90
   4  -5   3   56.19    8.50
  -4  -5  -3   61.49    9.50
   4  -5   3   70.79   14.30
   4   5   3   51.99    6.60
  -4   5  -3   56.29   10.20
   4   5   3   64.09   14.50
   5  -5   3  116.69   19.30
  -5  -5  -3  126.39   13.60
  -5   5  -3  113.09   13.70
   5   5   3   88.59   18.40
   6  -5   3    0.00   12.40
  -6   5  -3    3.10    7.70
   6   5   3   19.00   14.50
   7  -5   3  235.18   30.20
   7   5   3  149.99   27.10
   8  -5   3   98.69   22.90
   8   5   3    8.90   16.30
   9  -6  -3  467.55   33.80
   9   6  -3  443.06   31.30
   9   6  -3  361.56   43.20
   8  -6  -3  241.68   26.50
   8   6  -3  255.37   34.50
  -8   6   3  227.88   34.10
   8   6  -3  241.78   24.70
  -7   6   3  143.39   25.40
   7   6  -3   27.10   17.90
   7   6  -3   46.00   12.90
   6  -6  -3  273.07   15.00
   6  -6  -3  306.57   26.80
  -6   6   3  298.27   34.10
   6   6  -3  298.67   22.50
  -5  -6   3  289.97   29.50
   5  -6  -3  288.87   24.60
   5  -6  -3  285.77   14.20
  -5   6   3  278.17   30.20
   5   6  -3  242.88   19.10
   4  -6  -3 1417.06   42.50
   4  -6  -3 1399.96   52.19
  -4  -6   3 1373.96   60.79
   4   6  -3 1454.55   51.09
  -4   6   3 1429.36   63.29
   3  -6  -3 5189.68  135.49
  -3  -6   3 4952.60  175.68
   3  -6  -3 4889.31  147.99
  -3  -6   3 5305.47  131.59
  -3   6   3 5210.38  178.78
   3   6  -3 5077.19  131.09
   3   6  -3 5318.07  147.49
  -2  -6   3    0.00    8.60
   2  -6  -3    3.40    3.80
  -2   6   3    0.00    5.80
   2   6  -3    6.90    3.50
   2   6  -3    8.20    5.30
  -2   6   3   14.60   11.50
  -1  -6   3 1480.85   52.39
   1  -6  -3 1391.06   43.00
   1   6  -3 1486.25   42.70
  -1   6   3 1472.55   57.49
   1   6  -3 1373.06   44.70
  -1   6   3 1502.45   46.70
   0  -6  -3  119.59   10.10
   0  -6   3  114.39    9.40
   0   6   3  129.49   14.10
   0   6   3  127.09    9.10
   0   6  -3  119.59    8.70
   0   6  -3  123.59   10.40
  -1  -6  -3    4.40    4.80
   1  -6   3    6.40    4.60
   1   6   3    5.60    3.40
  -1   6  -3   14.00    3.60
  -1   6  -3   14.20    5.90
   1   6   3    4.30    6.90
  -2  -6  -3 1920.01   57.39
   2  -6   3 1942.41   69.19
  -2   6  -3 1944.31   58.79
  -2   6  -3 1835.42   55.49
   2   6   3 1997.80   72.29
   2   6   3 1882.61   53.99
  -3  -6  -3 1595.74   50.19
   3  -6   3 1560.84   61.69
   3   6   3 1616.84   64.29
   3   6   3 1606.74   46.20
  -3   6  -3 1606.24   49.50
  -3   6  -3 1504.85   51.09
   4  -6   3  199.48   19.20
  -4  -6  -3  172.98   14.60
   4  -6   3  183.48   13.00
   4   6   3  165.88   21.50
  -4   6  -3  161.98   15.50
   4   6   3  160.68   10.30
   5  -6   3  396.56   29.30
  -5  -6  -3  388.56   21.30
  -5   6  -3  392.96   22.70
   5   6   3  349.37   29.10
   6  -6   3   46.80   15.60
  -6   6  -3   39.20   10.40
   6   6   3   11.10   14.30
   7  -6   3  463.85   37.70
   7   6   3  502.65   39.60
   8  -6   3  335.27   39.70
   8   6   3  408.66   44.50
   9  -7  -3   18.20   14.40
   9   7  -3   46.10   15.00
   9   7  -3   76.19   24.10
   8  -7  -3  144.29   21.70
   8   7  -3  158.18   28.30
  -8   7   3  120.49   28.10
   8   7  -3  157.58   20.80
   7  -7  -3  660.03   36.90
  -7   7   3  600.64   44.70
   7   7  -3  558.14   42.50
   7   7  -3  627.84   33.80
   6  -7  -3   25.60    6.80
   6  -7  -3   29.10   12.00
   6   7  -3   27.10   10.90
  -6   7   3   29.10   18.00
   5  -7  -3  326.87   22.80
  -5  -7   3  333.27   29.30
   5  -7  -3  340.47   16.20
   5   7  -3  346.37   22.60
  -5   7   3  347.57   31.20
   4  -7  -3    4.60    8.10
   4  -7  -3    0.00    4.10
  -4  -7   3    2.40   11.50
   4   7  -3    0.00    5.40
  -4   7   3   25.30   14.10
   3  -7  -3  166.68   10.90
  -3  -7   3  159.38   18.40
  -3   7   3  155.98   16.10
   3   7  -3  153.48   14.20
  -3   7   3  172.48   21.70
   2  -7  -3  633.64   22.90
  -2  -7   3  651.43   30.10
  -2   7   3  589.44   26.50
   2   7  -3  598.34   25.00
  -2   7   3  618.94   34.20
   2   7  -3  645.24   20.90
  -1  -7   3  973.60   36.40
   1  -7  -3  902.01   30.80
  -1   7   3  891.51   41.50
   1   7  -3  953.00   31.90
   1   7  -3  939.21   30.30
  -1   7   3  967.50   33.30
   0  -7  -3  390.26   17.30
   0  -7   3  353.56   17.00
   0   7   3  347.67   22.30
   0   7  -3  368.06   17.10
   0   7  -3  394.36   16.20
   0   7  -3  383.56   15.70
   0   7   3  427.46   16.90
  -1  -7  -3 1192.98   38.30
   1  -7   3 1209.98   42.70
   1   7   3 1145.69   47.00
  -1   7  -3 1216.48   39.30
  -1   7  -3 1134.49   35.80
   1   7   3 1231.68   36.10
  -2  -7  -3    3.40    4.90
   2  -7   3   10.00    6.40
  -2   7  -3    7.90    4.30
   2   7   3    8.90    7.80
   2   7   3    9.20    3.40
  -2   7  -3    1.60    5.50
   3  -7   3  931.31   40.60
  -3  -7  -3  917.91   33.30
  -3   7  -3  881.01   32.00
   3   7   3  879.21   29.10
   3   7   3  997.40   43.90
  -3   7  -3  984.00   35.20
  -4  -7  -3  507.95   23.60
   4  -7   3  501.95   30.40
  -4   7  -3  578.84   25.00
   4   7   3  525.55   20.00
  -4   7  -3  469.95   24.80
   4   7   3  498.05   32.00
  -5  -7  -3   57.39   10.20
   5  -7   3   54.09   15.20
   5   7   3   64.69   16.60
  -5   7  -3   47.70   11.00
   6  -7   3  344.67   30.00
  -6   7  -3  372.46   23.30
   6   7   3  319.67   30.70
   7  -7   3  145.99   25.30
  -7   7  -3  107.29   15.70
   7   7   3  166.28   26.80
   8  -7   3   29.30   17.40
   8   7   3  157.98   28.80
   9  -8  -3    0.00   13.40
   9   8  -3    6.30   19.20
   9   8  -3   14.90   12.90
  -9   8   3   17.70   21.50
   8  -8  -3  112.59   20.00
  -8   8   3   81.79   25.60
   8   8  -3   94.39   17.10
   8   8  -3  110.49   25.10
   7  -8  -3    0.00   10.30
   7   8  -3    7.80    9.00
   7   8  -3   31.30   17.10
  -7   8   3   24.30   17.40
   6  -8  -3   80.79   16.30
   6  -8  -3   85.89   10.20
   6   8  -3   93.09   21.30
   6   8  -3   65.49   12.80
  -6   8   3  114.19   24.80
   5  -8  -3  193.68   20.50
   5  -8  -3  184.68   12.70
  -5   8   3  209.28   26.90
   5   8  -3  210.78   19.20
  -4  -8   3   34.30   13.60
  -4  -8   3   31.20    3.60
   4  -8  -3   44.50   11.10
   4  -8  -3   25.60    5.90
   4   8  -3   28.20    8.50
  -4   8   3   21.50   14.50
  -3  -8   3   84.79   13.90
   3  -8  -3   67.69    8.10
  -3   8   3   47.10   10.80
   3   8  -3   62.29    9.70
  -3   8   3   63.29   16.40
   2  -8  -3  202.98   12.40
  -2  -8   3  205.98   18.10
   2   8  -3  242.78   14.70
  -2   8   3  206.78   15.50
  -2   8   3  233.88   22.60
   2   8  -3  239.98   11.50
   1  -8  -3  133.29   11.00
  -1  -8   3  151.78   12.80
  -1   8   3  129.69   11.90
   1   8  -3  139.59   10.30
   1   8  -3  139.19   10.70
  -1   8   3  150.68   17.70
   0  -8  -3  508.15   20.30
   0  -8   3  487.45   19.90
   0   8   3  512.65   19.70
   0   8   3  444.56   25.60
   0   8  -3  485.75   20.70
   0   8  -3  506.35   18.90
   0   8  -3  478.15   18.80
   1  -8   3  367.96   16.30
  -1  -8  -3  344.57   17.00
  -1   8  -3  353.16   18.10
   1   8   3  351.66   14.40
   1   8   3  377.56   21.70
  -1   8  -3  352.76   14.90
  -2  -8  -3  440.46   20.30
   2  -8   3  459.65   22.40
   2   8   3  477.45   26.40
   2   8   3  482.05   17.20
  -2   8  -3  441.46   18.60
  -2   8  -3  476.95   22.30
   3  -8   3  179.68   15.80
  -3  -8  -3  153.98   13.40
   3   8   3  170.88    9.70
  -3   8  -3  144.39   12.20
   3   8   3  189.18   20.00
  -3   8  -3  191.28   15.80
  -4  -8  -3  587.44   25.90
   4  -8   3  609.14   33.40
  -4   8  -3  637.14   27.40
   4   8   3  598.24   35.40
  -4   8  -3  622.14   28.50
   4   8   3  602.84   22.70
   5  -8   3   56.39   10.60
  -5  -8  -3   65.19   10.00
   5  -8   3   53.79   14.90
   5   8   3   45.90   15.30
  -5   8  -3   52.99   10.70
   6  -8   3   42.80   15.90
   6   8   3   86.19   19.50
  -6   8  -3   42.40   10.90
   7  -8   3   82.19   20.70
   7   8   3  139.19   25.20
  -7   8  -3  119.09   16.00
   8  -8   3   10.60   16.70
   8   8   3   34.20   18.90
   9  -9  -3   78.29   18.30
   9   9  -3   33.90   20.90
   9   9  -3   62.99   16.40
  -9   9   3   92.09   28.10
   8  -9  -3    9.90   12.20
  -8   9   3   37.90   21.40
   8   9  -3   53.99   20.50
   8   9  -3    0.60   10.20
   7  -9  -3    7.50   11.10
   7   9  -3   23.40   16.80
   7   9  -3   15.80   10.40
  -7   9   3   33.90   19.20
   6  -9  -3   24.20   11.80
   6   9  -3   31.00   10.70
  -6   9   3   38.10   18.50
   6   9  -3   16.50   15.10
   5  -9  -3  479.85   20.90
   5  -9  -3  453.65   28.50
  -5   9   3  428.86   35.30
   5   9  -3  498.05   26.10
  -4  -9   3   39.90    3.90
   4  -9  -3   40.10    7.00
  -4  -9   3   45.90   13.80
   4   9  -3   32.10    8.80
  -4   9   3   54.59   16.70
  -3  -9   3   78.29    6.50
   3  -9  -3   91.39    9.60
  -3  -9   3   84.49   14.20
  -3   9   3   68.09   17.50
  -3   9   3   62.59   11.60
   3   9  -3   94.49   11.40
   2  -9  -3  791.22   28.20
  -2  -9   3  819.62   34.70
  -2   9   3  790.02   32.50
   2   9  -3  786.92   30.00
  -2   9   3  777.82   40.40
   2   9  -3  836.82   26.40
  -1  -9   3  277.87   15.50
   1  -9  -3  299.47   15.00
  -1   9   3  264.67   23.00
   1   9  -3  284.27   16.10
   1   9  -3  273.67   14.40
  -1   9   3  283.17   15.60
   1   9  -3  297.77   15.10
   0  -9  -3  287.37   15.10
   0   9  -3  283.67   15.50
   0   9  -3  308.67   14.20
   0   9   3  294.47   14.40
   0   9   3  267.67   20.00
   1  -9   3  396.36   16.70
  -1  -9  -3  373.56   17.70
   1   9   3  393.66   15.90
  -1   9  -3  358.06   18.80
  -1   9  -3  362.66   15.70
   1   9   3  347.97   22.50
  -2  -9  -3   21.60    6.40
   2  -9   3   16.40    6.80
   2   9   3   20.00    4.60
   2   9   3   21.30    9.40
  -2   9  -3   15.30    5.00
  -2   9  -3   15.10    6.70
   3  -9   3  526.95   26.60
  -3  -9  -3  469.05   21.70
  -3   9  -3  463.15   23.50
   3   9   3  441.76   18.10
   3   9   3  463.75   28.50
  -3   9  -3  488.65   21.60
   4  -9   3  169.38   20.10
  -4  -9  -3  169.28   14.70
  -4   9  -3  179.48   17.00
   4   9   3  188.68   22.90
  -4   9  -3  248.88   17.40
   4   9   3  215.78   12.20
  -5  -9  -3    3.00    6.40
   5   9   3    0.00   11.00
  -5   9  -3   12.20    7.80
   6  -9   3    0.00   12.20
   6   9   3    9.80   14.10
  -6   9  -3    0.00    7.50
   7  -9   3   71.99   20.60
  -7   9  -3   68.99   13.60
   7   9   3   53.59   19.90
   8  -9   3   39.20   19.40
   8   9   3    3.70   18.50
   9 -10  -3  330.27   32.90
   9  10  -3  252.17   37.60
   9  10  -3  310.57   29.20
  -9  10   3  227.98   36.50
   8 -10  -3  185.98   24.70
  -8  10   3  209.58   34.30
   8  10  -3  134.99   27.70
   8  10  -3  191.18   22.70
   7 -10  -3   47.90   13.80
  -7  10   3  106.79   22.80
   7  10  -3   48.50   13.10
   7  10  -3   81.59   21.30
   6 -10  -3  746.53   29.70
   6 -10  -3  781.02   39.80
   6  10  -3  725.93   45.30
   6  10  -3  829.32   37.60
  -6  10   3  746.93   48.70
   5 -10  -3   76.09   14.80
   5 -10  -3   64.79    9.30
  -5  10   3   84.09   20.80
   5  10  -3   51.09   11.10
   5  10  -3   30.20   14.90
   4 -10  -3 1002.60   35.10
  -4 -10   3 1011.10   29.50
   4  10  -3 1055.19   40.80
  -4  10   3 1024.20   43.50
  -4  10   3 1069.69   52.89
  -3 -10   3  795.92   25.30
   3 -10  -3  837.82   29.40
  -3 -10   3  812.82   37.60
  -3  10   3  772.72   42.40
   3  10  -3  814.52   32.30
  -3  10   3  765.82   35.00
  -2 -10   3  142.39   13.60
   2 -10  -3   97.39    9.70
  -2  10   3  101.89   11.90
   2  10  -3  101.69   10.80
  -2  10   3  146.89   19.80
   2  10  -3  118.89    9.60
   1 -10  -3  440.26   19.00
  -1 -10   3  422.36   18.90
  -1  10   3  411.56   20.00
   1  10  -3  407.86   18.70
  -1  10   3  428.66   27.40
   1  10  -3  371.06   18.60
   1  10  -3  398.16   18.00
   0 -10  -3  700.83   26.10
   0  10   3  685.63   25.50
   0  10  -3  703.13   26.60
   0  10  -3  671.73   24.70
   0  10   3  683.63   33.40
  -1 -10  -3  375.06   18.20
   1 -10   3  390.76   16.40
   1  10   3  364.86   15.90
  -1  10  -3  362.36   16.20
  -1  10  -3  369.46   19.30
   1  10   3  391.36   23.10
   2 -10   3 1768.32   63.79
  -2 -10  -3 1825.32   54.89
   2  10   3 1816.92   52.89
   2  10   3 1734.63   68.19
  -2  10  -3 1693.83   54.39
  -2  10  -3 1802.42   56.89
   3 -10   3  828.52   36.50
  -3 -10  -3  794.62   30.60
   3  10   3  777.42   39.20
  -3  10  -3  775.32   32.60
   3  10   3  787.02   27.40
  -3  10  -3  831.72   30.60
   4 -10   3  110.89   16.40
  -4 -10  -3   95.09   11.30
  -4  10  -3   76.69   12.20
   4  10   3   90.19   17.50
   4  10   3   96.19    9.60
  -5 -10  -3  969.60   36.00
   5 -10   3  823.32   45.90
  -5  10  -3  941.01   38.40
   5  10   3  907.71   49.20
   6  10   3    1.80   12.80
  -6  10  -3   26.80    9.70
   7 -10   3  253.97   32.00
  -7  10  -3  225.28   22.00
   7  10   3  213.08   32.00
   8 -10   3  227.68   32.50
   8  10   3  143.29   29.70
   9 -11  -3   32.30   16.40
   9  11  -3   77.29   17.20
   9  11  -3   86.59   23.40
  -9  11   3   66.29   25.00
   8 -11  -3  177.88   24.50
   8  11  -3  148.99   20.30
  -8  11   3  132.29   29.40
   8  11  -3  120.49   27.00
   7 -11  -3  434.36   31.30
   7  11  -3  402.56   35.10
  -7  11   3  402.66   38.90
   7  11  -3  476.55   29.00
   6 -11  -3  104.19   17.60
   6 -11  -3   71.99   10.60
   6  11  -3   90.69   20.30
  -6  11   3   95.09   23.00
   6  11  -3   86.09   15.00
   5 -11  -3  316.27   17.50
   5 -11  -3  327.57   24.30
   5  11  -3  273.27   26.80
   5  11  -3  299.37   21.40
  -5  11   3  308.37   32.70
  -4 -11   3    5.10    3.40
   4 -11  -3    5.30    5.40
  -4  11   3    6.20   14.70
  -4  11   3    8.90    9.10
   4  11  -3    0.00   11.00
   4  11  -3    4.30    6.80
   3 -11  -3  283.87   15.90
  -3 -11   3  275.37   12.80
  -3  11   3  277.97   19.70
  -3  11   3  285.67   27.70
   3  11  -3  313.37   17.90
   2 -11  -3  199.08   13.50
  -2  11   3  227.08   16.60
   2  11  -3  201.28   13.80
   2  11  -3  212.48   12.20
  -2  11   3  277.27   25.90
   1 -11  -3  661.13   26.00
  -1  11   3  738.73   37.00
  -1  11   3  652.13   27.50
   1  11  -3  667.23   25.60
   1  11  -3  698.03   26.40
   0 -11  -3  276.87   15.40
   0  11  -3  270.97   15.70
   0  11  -3  265.77   14.00
   0  11   3  278.47   15.00
   0  11   3  256.57   21.40
  -1 -11  -3  486.45   21.50
   1 -11   3  467.05   19.20
   1  11   3  488.35   19.70
   1  11   3  467.25   26.70
  -1  11  -3  486.25   19.80
  -1  11  -3  513.95   22.90
  -2 -11  -3   32.10    7.20
   2 -11   3   43.10    8.10
   2  11   3   39.50    6.20
   2  11   3   41.70   11.00
  -2  11  -3   33.30    6.90
  -2  11  -3   32.70    7.90
  -3 -11  -3   27.20    7.30
   3 -11   3   23.20    8.70
   3  11   3   18.70    5.20
  -3  11  -3   21.70    7.00
   3  11   3   26.00   10.10
  -3  11  -3   17.60    7.80
   4 -11   3  589.84   33.50
  -4 -11  -3  586.64   26.30
   4  11   3  619.64   23.80
  -4  11  -3  675.63   28.90
   4  11   3  569.74   35.50
  -4  11  -3  613.44   29.40
   5 -11   3   11.60   12.60
  -5 -11  -3   21.30    7.50
   5  11   3   39.80   14.70
  -5  11  -3    4.40    7.50
   6 -11   3  677.53   42.70
  -6  11  -3  748.23   34.50
   6  11   3  669.33   44.40
   7 -11   3   66.49   20.10
   7  11   3   71.49   21.40
  -7  11  -3   72.39   14.20
   8 -11   3   12.00   18.80
   8  11   3   77.19   23.10
   9 -12  -3   17.90   16.20
   9  12  -3   47.20   15.40
   9  12  -3   27.30   21.40
  -9  12   3    8.50   23.30
   8 -12  -3   90.39   19.60
   8  12  -3  122.79   26.30
   8  12  -3  131.79   19.60
  -8  12   3   98.59   26.80
   7 -12  -3   21.30   13.40
   7  12  -3   52.09   13.10
  -7  12   3   21.90   19.00
   7  12  -3   45.00   18.50
   6 -12  -3   69.39   16.00
   6 -12  -3   65.39   10.50
  -6  12   3   50.39   20.30
   6  12  -3   47.70   12.40
   6  12  -3   72.99   19.10
   5 -12  -3   43.30    8.40
   5  12  -3   26.30    9.40
   5  12  -3   21.20   13.60
  -5  12   3    4.70   16.60
   4 -12  -3  259.67   15.80
  -4 -12   3  254.17   11.70
   4  12  -3  249.88   17.60
  -4  12   3  272.67   30.30
   4  12  -3  255.17   22.70
  -4  12   3  281.07   22.30
  -3 -12   3   16.10    4.70
   3 -12  -3   21.40    6.50
   3  12  -3   16.20    9.70
   3  12  -3   14.70    6.30
  -3  12   3   12.90   14.80
  -3  12   3   25.90    9.10
   2 -12  -3  181.18   13.20
   2  12  -3  189.68   11.90
   2  12  -3  173.98   13.10
  -2  12   3  204.28   23.60
  -2  12   3  192.78   15.00
   2  12  -3  196.78   14.80
   1 -12  -3    5.60    5.00
  -1  12   3    7.80    6.10
   1  12  -3    7.40    5.30
   1  12  -3    2.10    4.80
  -1  12   3    0.00   11.40
   0 -12  -3  194.38   13.50
   0  12  -3  232.58   13.30
   0  12  -3  186.68   14.20
   0  12   3  216.28   13.70
   0  12   3  224.48   20.40
   1 -12   3  140.89    8.40
  -1 -12  -3  111.79   11.50
   1  12   3  133.79   11.10
  -1  12  -3  123.89   12.80
   1  12   3  141.59   16.60
  -1  12  -3  125.59   11.00
  -2 -12  -3  166.18   14.00
   2 -12   3  168.38   12.60
  -2  12  -3  184.98   15.80
  -2  12  -3  148.39   11.80
   2  12   3  151.38   10.50
   2  12   3  178.18   17.30
  -3 -12  -3  422.06   20.80
   3 -12   3  409.86   23.10
  -3  12  -3  410.66   20.70
   3  12   3  398.36   17.70
   3  12   3  376.66   26.50
  -3  12  -3  379.86   22.20
  -4 -12  -3  211.28   15.90
   4 -12   3  244.18   21.50
   4  12   3  240.18   14.10
  -4  12  -3  283.87   18.70
  -4  12  -3  202.38   19.00
   4  12   3  281.87   24.60
  -5 -12  -3   36.40    9.20
   5 -12   3   34.40   14.30
   5  12   3   63.09   17.00
  -5  12  -3   49.20   11.40
   6 -12   3   18.80   13.50
  -6  12  -3   30.70   10.40
   7 -12   3  169.88   27.40
   7  12   3  181.58   29.00
  -7  12  -3  167.58   19.90
   8 -12   3   11.60   16.10
   8  12   3    0.00   18.20
   9 -13  -3   17.00   15.50
   9  13  -3   22.20   21.80
  -9  13   3   54.09   26.00
   9  13  -3   28.80   13.40
   8 -13  -3   62.69   18.00
   8  13  -3   58.69   15.30
   8  13  -3   59.29   22.60
  -8  13   3   81.79   26.10
   7 -13  -3   72.89   16.80
   7  13  -3  104.09   16.60
   7  13  -3   86.29   22.00
  -7  13   3   76.99   23.70
   6 -13  -3   66.09   16.10
   6 -13  -3   71.09   11.10
   6  13  -3   72.39   13.40
  -6  13   3   92.89   23.70
   6  13  -3   71.79   18.60
   5 -13  -3  261.67   17.20
  -5  13   3  289.67   33.10
  -5  13   3  316.67   28.30
   5  13  -3  302.07   21.10
   5  13  -3  273.57   25.20
   4 -13  -3  120.99   12.90
  -4 -13   3  113.79    8.80
   4  13  -3  108.19   13.70
   4  13  -3  113.89   16.80
  -4  13   3   98.39   15.80
  -4  13   3  102.09   22.20
   3 -13  -3    0.00    4.60
  -3 -13   3    0.00    3.80
  -3  13   3    2.80   14.60
   3  13  -3    5.90    6.30
  -3  13   3    5.00    6.90
   3  13  -3    2.80    7.60
   2 -13  -3   81.69   10.70
   2  13  -3   78.99   10.30
   2  13  -3   68.19    9.40
   2  13  -3   63.69    8.30
  -2  13   3   68.79   11.00
  -2  13   3   78.39   17.40
   1 -13  -3   58.39    9.20
   1  13  -3   82.69    9.80
   1  13  -3   93.49   10.10
  -1  13   3   77.89   16.30
  -1  13   3   82.69   10.80
   0 -13  -3  199.38   13.80
   0  13  -3  177.98   12.60
   0  13  -3  189.28   14.40
   0  13   3  214.78   20.50
   0  13   3  214.08   13.90
  -1 -13  -3   98.19   10.80
   1  13   3   93.09    9.50
  -1  13  -3   99.79   10.20
  -1  13  -3  106.99   12.60
   1  13   3  100.09   14.90
   2 -13   3    8.50    6.30
  -2 -13  -3    5.20    5.20
  -2  13  -3    0.00    5.50
   2  13   3    0.00    8.00
   2  13   3    0.00    4.30
  -2  13  -3   11.00    5.60
   3 -13   3  322.47   20.80
  -3 -13  -3  342.77   18.80
  -3  13  -3  341.17   19.30
  -3  13  -3  316.97   20.70
   3  13   3  315.77   16.10
   3  13   3  331.07   25.10
   4 -13   3  260.77   21.80
  -4 -13  -3  265.57   17.40
  -4  13  -3  278.87   20.00
   4  13   3  306.07   25.40
  -4  13  -3  227.68   17.90
   4  13   3  283.97   15.80
   5 -13   3   97.59   18.00
  -5 -13  -3   64.59   11.10
   5  13   3   86.29   18.80
  -5  13  -3  103.79   14.40
   6 -13   3  127.49   22.70
  -6  13  -3   86.99   14.90
   6  13   3   84.79   20.70
   7 -13   3  151.38   25.60
   7  13   3   81.39   21.70
  -7  13  -3   77.49   15.50
   8 -13   3  114.09   27.00
   8  13   3  128.39   28.20
   9 -14  -3   69.19   20.50
  -9  14   3  111.69   31.20
   9  14  -3  102.19   28.80
   9  14  -3  163.38   22.80
   8 -14  -3  238.38   28.50
   8  14  -3  243.08   25.20
  -8  14   3  210.18   35.10
   8  14  -3  221.78   33.30
   7 -14  -3  122.99   15.00
   7 -14  -3  116.49   20.40
   7  14  -3  116.79   17.70
  -7  14   3  147.49   28.70
   7  14  -3  110.79   23.50
   6 -14  -3  618.84   35.90
   6 -14  -3  537.85   26.10
  -6  14   3  508.85   41.40
   6  14  -3  517.05   37.60
   6  14  -3  611.04   31.20
   5 -14  -3   21.50    7.40
  -5  14   3   26.30   11.00
  -5  14   3    0.00   17.10
   5  14  -3   15.30    8.80
   5  14  -3    4.80   12.80
  -4 -14   3  389.86   16.30
   4 -14  -3  376.26   20.20
   4  14  -3  369.36   22.30
   4  14  -3  392.46   26.70
  -4  14   3  375.36   33.30
  -4  14   3  362.06   25.10
  -3 -14   3  156.08   10.90
   3 -14  -3  162.78   15.10
  -3  14   3  118.89   14.60
   3  14  -3  162.68   15.20
   3  14  -3  146.69   16.20
  -3  14   3  171.68   24.60
   2 -14  -3   47.20    8.50
   2  14  -3   48.20    8.50
  -2  14   3   39.40    8.90
   2  14  -3   54.59    8.90
  -2  14   3   41.90   16.30
   1 -14  -3 1207.18   41.10
  -1  14   3 1170.38   42.70
  -1  14   3 1207.78   53.29
   1  14  -3 1174.98   41.10
   1  14  -3 1224.98   40.20
   0 -14  -3 1774.92   55.89
   0  14   3 1773.52   56.89
   0  14  -3 1704.93   55.79
   0  14   3 1855.91   69.79
   0  14  -3 1746.63   55.99
  -1 -14  -3  327.87   17.50
  -1  14  -3  290.57   15.70
  -1  14  -3  279.87   18.20
   1  14   3  304.97   16.00
   1  14   3  278.17   22.30
  -2 -14  -3  983.40   34.50
   2 -14   3  840.92   34.50
   2  14   3  914.91   32.10
  -2  14  -3  862.41   33.20
   2  14   3  860.21   41.20
  -2  14  -3  873.31   35.60
   3 -14   3  106.79   13.90
  -3 -14  -3  112.59   12.40
   3  14   3  125.49   18.10
  -3  14  -3  105.59   12.40
  -3  14  -3  114.89   14.10
   3  14   3  122.39   11.50
  -4 -14  -3    6.30    6.60
   4 -14   3    6.20   10.20
  -4  14  -3   11.80    8.30
  -4  14  -3   10.60    8.40
   4  14   3   17.20    6.30
   4  14   3   21.40   12.10
  -5 -14  -3  429.66   23.10
   5 -14   3  397.26   29.80
   5  14   3  428.26   32.60
  -5  14  -3  461.35   26.70
  -6  14  -3   96.09   15.00
   6  14   3   64.59   19.50
   7 -14   3  350.76   33.60
   7  14   3  378.86   40.50
  -7  14  -3  340.07   28.10
   9 -15  -3    7.60   15.10
   9  15  -3   29.40   14.20
   9  15  -3   25.20   21.50
   8 -15  -3  281.67   31.10
   8  15  -3  303.97   27.50
   8  15  -3  292.27   37.10
  -8  15   3  251.87   38.10
   7 -15  -3  641.24   39.60
   7 -15  -3  667.93   30.30
  -7  15   3  546.55   46.80
   7  15  -3  628.14   34.20
   7  15  -3  584.94   43.20
   6 -15  -3    5.80    6.60
   6  15  -3    3.20    8.40
  -6  15   3    0.00   17.70
   6  15  -3    1.40   13.60
   5 -15  -3  341.87   20.40
  -5  15   3  389.96   34.80
   5  15  -3  348.07   28.50
   5  15  -3  372.36   23.00
  -5  15   3  395.06   27.10
  -4 -15   3   59.59    7.50
   4 -15  -3   50.29    9.70
   4  15  -3   42.40   13.40
  -4  15   3   58.89   12.50
  -4  15   3   43.80   19.20
   4  15  -3   55.89   10.60
   3 -15  -3  126.39   13.10
  -3 -15   3  104.09    9.90
   3  15  -3  103.29   12.80
   3  15  -3  114.89   14.30
  -3  15   3  107.59   14.50
  -3  15   3   81.49   21.10
   2 -15  -3 1227.58   42.40
  -2 -15   3 1190.78   39.80
  -2  15   3 1196.28   45.40
   2  15  -3 1236.08   45.10
   2  15  -3 1228.58   43.30
  -2  15   3 1140.19   55.59
   1 -15  -3  588.64   25.20
   1  15  -3  541.65   24.50
  -1  15   3  563.44   26.10
  -1  15   3  536.25   34.20
   1  15  -3  579.04   24.60
   0 -15  -3  332.17   18.70
   0  15   3  356.26   19.10
   0  15  -3  355.76   19.70
   0  15   3  370.86   26.50
   0  15  -3  328.97   17.70
  -1 -15  -3 1757.92   55.39
  -1  15  -3 1726.23   56.79
   1  15   3 1748.93   55.19
  -1  15  -3 1713.63   55.79
   1  15   3 1688.83   68.19
   2 -15   3   27.80    7.00
  -2 -15  -3   27.50    7.60
  -2  15  -3   40.10    9.70
   2  15   3   36.70    7.30
  -2  15  -3   29.70    7.60
   2  15   3   29.70   11.00
  -3 -15  -3    8.00    6.50
   3 -15   3   21.00    9.60
   3  15   3   21.30   11.90
  -3  15  -3   26.60    8.20
  -3  15  -3   18.10    8.10
   3  15   3   18.70    6.60
  -4 -15  -3  468.95   23.80
   4 -15   3  460.95   28.70
   4  15   3  423.36   30.50
  -4  15  -3  491.95   26.10
  -4  15  -3  494.35   26.70
   4  15   3  462.05   21.70
  -5 -15  -3    9.60    7.60
   5 -15   3    1.00   11.80
   5  15   3   16.70   12.00
  -5  15  -3    0.00    8.00
  -5  15  -3    0.00    8.90
  -6  15  -3  881.51   40.10
   6  15   3  837.42   50.49
   7  15   3  161.38   27.60
  -7  15  -3  122.49   18.10
   8 -16  -3   61.09   18.70
  -8  16   3   57.39   25.70
   8  16  -3   71.79   15.50
   8  16  -3   91.29   22.40
   7 -16  -3    7.10   13.10
   7 -16  -3    6.00    8.10
   7  16  -3   32.60   18.10
   7  16  -3   11.00   10.50
  -7  16   3   17.50   20.00
   6 -16  -3    0.00    6.60
  -6  16   3    0.00   10.70
   6  16  -3    0.00   13.40
   6  16  -3    7.10    8.40
  -6  16   3    0.00   17.00
   5 -16  -3   25.60    8.50
   5  16  -3   19.70    8.80
   5  16  -3   33.80   15.10
  -5  16   3   42.70   19.50
  -5  16   3   12.30   10.20
  -4 -16   3  304.47   15.40
   4 -16  -3  276.47   18.40
  -4  16   3  303.07   32.70
   4  16  -3  303.17   23.50
  -4  16   3  299.47   26.20
   4  16  -3  281.77   19.40
  -3 -16   3  108.19   10.50
   3 -16  -3  101.39   12.50
   3  16  -3   90.09   13.20
  -3  16   3  109.39   15.40
   3  16  -3   72.79   11.40
  -3  16   3  111.29   22.20
  -2 -16   3  100.19   10.80
   2 -16  -3   88.69   11.50
  -2  16   3   96.39   19.90
   2  16  -3  103.99   12.30
  -2  16   3   80.89   12.70
   2  16  -3   89.79   10.10
   1 -16  -3    4.60    5.50
  -1  16   3    8.10   13.70
  -1  16   3    0.00    6.10
   1  16  -3    4.90    5.70
   1  16  -3    4.90    5.50
   0 -16  -3    2.70    5.40
   0  16   3    1.70    5.30
   0  16  -3    4.50    6.20
   0  16  -3    0.00    5.00
   0  16   3    0.00   11.00
  -1 -16  -3   43.90    8.50
  -1  16  -3   38.00    8.20
   1  16   3   41.90    8.20
   1  16   3   46.90   12.60
  -1  16  -3   31.00    8.40
   2 -16   3  417.06   20.40
  -2 -16  -3  474.15   23.10
  -2  16  -3  480.55   23.10
   2  16   3  443.86   20.90
  -2  16  -3  459.95   24.80
   2  16   3  431.46   28.20
  -3 -16  -3   78.29   10.50
   3 -16   3   82.99   13.00
  -3  16  -3   75.69   12.90
  -3  16  -3   53.89   10.50
   3  16   3   73.79   15.50
   3  16   3   94.89   11.00
  -4 -16  -3    0.90    6.60
   4  16   3    7.00    6.20
  -4  16  -3    1.70    7.50
  -4  16  -3    3.70    8.10
   4  16   3    7.80   11.60
  -5  16  -3    0.00    7.30
   5  16   3    4.80   12.50
  -6  16  -3   46.00   13.00
   6  16   3  110.49   22.10
  -7  16  -3  116.49   18.60
   7  16   3  119.89   25.90
   8 -17  -3    9.50   13.20
   8  17  -3   27.10   19.20
  -8  17   3    2.30   22.10
   8  17  -3   21.70   12.00
   7 -17  -3   68.49   16.30
   7 -17  -3   88.39   14.10
   7  17  -3   75.59   14.50
   7  17  -3   61.19   20.50
  -7  17   3   59.29   25.20
   6 -17  -3   76.89   12.70
  -6  17   3  108.99   26.30
   6  17  -3   61.99   13.50
   6  17  -3   89.89   20.50
  -6  17   3   60.49   17.60
   5 -17  -3  357.46   21.50
  -5  17   3  345.07   33.40
   5  17  -3  381.36   23.90
   5  17  -3  361.16   28.50
  -5  17   3  348.67   28.40
   4 -17  -3    0.00    6.00
  -4 -17   3    0.00    4.80
  -4  17   3    4.50    9.00
   4  17  -3    2.70    7.30
   4  17  -3    0.00    9.00
  -4  17   3   14.90   15.30
   3 -17  -3    3.30    6.30
  -3 -17   3   10.60    5.70
  -3  17   3    0.00    6.90
   3  17  -3    1.70    7.50
  -3  17   3    0.00   15.00
   3  17  -3    0.00    5.70
   2 -17  -3   12.10    7.10
  -2 -17   3   14.90    6.70
  -2  17   3   28.90   16.30
  -2  17   3   19.80    8.70
   2  17  -3   32.20    8.40
   2  17  -3   15.30    6.50
   1 -17  -3  309.37   18.30
  -1  17   3  264.87   17.60
  -1  17   3  296.87   28.20
   1  17  -3  272.07   17.40
   1  17  -3  260.97   17.10
   0 -17  -3   85.09   11.40
   0  17  -3   51.49    8.80
   0  17   3   72.79   10.90
   0  17   3   81.59   16.40
   0  17  -3   54.19   10.00
  -1 -17  -3  199.98   15.40
   1  17   3  252.57   23.60
  -1  17  -3  191.08   15.00
  -1  17  -3  227.58   19.50
   1  17   3  213.78   14.90
  -2 -17  -3  138.99   14.20
  -2  17  -3  148.29   16.20
   2  17   3  134.99   13.10
   2  17   3  119.29   18.10
  -2  17  -3  141.79   14.50
  -3 -17  -3    1.10    6.30
   3  17   3    1.30   10.80
   3  17   3   13.10    6.30
  -3  17  -3    8.90    7.50
  -3  17  -3    0.00    6.70
  -4 -17  -3   23.40    8.10
   4  17   3   34.80    8.20
  -4  17  -3   24.50    9.60
   4  17   3   25.40   14.10
  -4  17  -3   14.10    9.20
   5  17   3   13.40   13.80
  -5  17  -3   20.50   10.30
  -5  17  -3   38.20   11.20
   6  17   3  358.66   33.70
  -6  17  -3  400.06   27.10
  -7  17  -3   11.60   11.60
   7  17   3   30.90   17.30
   8 -18  -3   34.50   18.30
  -8  18   3   65.39   27.80
   8  18  -3   79.29   16.20
   8  18  -3   80.79   23.60
   7 -18  -3   53.79   12.20
   7 -18  -3   56.69   17.90
   7  18  -3  104.49   24.80
   7  18  -3   95.89   16.50
  -7  18   3   74.19   26.30
   6 -18  -3  719.63   33.30
  -6  18   3  712.63   49.30
   6  18  -3  814.92   37.70
  -6  18   3  653.03   40.10
   6  18  -3  673.43   43.10
   5 -18  -3   64.59   11.70
  -5  18   3   41.60   13.60
  -5  18   3   81.29   23.10
   5  18  -3   54.99   11.80
   5  18  -3   58.19   16.70
  -4 -18   3  204.38   13.80
   4 -18  -3  190.38   17.80
  -4  18   3  219.58   23.10
   4  18  -3  193.18   18.90
  -4  18   3  232.78   30.00
   4  18  -3  215.08   20.30
  -3 -18   3  208.38   14.20
   3 -18  -3  192.08   17.60
   3  18  -3  207.08   16.30
   3  18  -3  194.98   17.40
  -3  18   3  220.38   29.70
  -3  18   3  203.08   20.70
   2 -18  -3   35.40    9.00
  -2 -18   3   42.60    8.50
  -2  18   3   37.00   18.50
  -2  18   3   37.00   10.00
   2  18  -3   32.40    8.30
   1 -18  -3 1074.89   40.40
  -1  18   3 1097.79   42.20
   1  18  -3 1080.19   40.70
  -1  18   3 1120.69   52.89
   0 -18  -3 1320.37   46.70
   0  18   3 1318.87   58.09
   0  18  -3 1423.76   47.50
   0  18   3 1272.87   47.20
   0  18  -3 1313.87   46.80
  -1 -18  -3  241.98   17.30
  -1  18  -3  266.67   18.50
   1  18   3  267.47   24.20
   1  18   3  234.58   15.70
  -1  18  -3  251.47   16.60
  -2 -18  -3  367.16   21.00
   2  18   3  388.96   20.40
  -2  18  -3  374.96   21.60
  -2  18  -3  364.06   22.60
   2  18   3  370.76   27.10
  -3 -18  -3   80.39   12.00
  -3  18  -3   94.99   13.40
   3  18   3   78.09   16.70
  -3  18  -3   89.89   14.20
   3  18   3  100.69   12.10
  -4 -18  -3   13.50    8.10
   4  18   3   19.00    7.80
   4  18   3   16.70   12.90
  -4  18  -3   22.10    9.90
  -4  18  -3   19.00   10.00
   5  18   3  681.43   42.60
  -5  18  -3  648.44   34.60
  -5  18  -3  718.63   36.30
   6  18   3  112.79   23.50
  -6  18  -3   85.69   16.50
   7  18   3  425.56   44.30
  -7  18  -3  399.36   29.40
   8 -19  -3  259.77   30.50
  -8  19   3  187.58   36.70
   8  19  -3  250.67   34.90
   8  19  -3  282.37   27.50
   7 -19  -3  418.66   26.60
  -7  19   3  459.85   48.40
   7  19  -3  416.86   36.50
   7  19  -3  496.55   30.20
   6 -19  -3    3.10    8.00
  -6  19   3   42.80   16.20
  -6  19   3   19.80   20.90
   6  19  -3   44.10   16.40
   6  19  -3   15.40   10.00
   5 -19  -3  233.68   20.10
   5  19  -3  234.28   25.90
  -5  19   3  279.97   34.40
  -5  19   3  224.78   25.30
   5  19  -3  229.88   21.50
   4 -19  -3   65.29   11.60
   4  19  -3   95.09   14.00
  -4  19   3   74.79   15.00
  -4  19   3   48.50   20.80
   3 -19  -3  194.98   17.80
  -3 -19   3  224.18   15.60
  -3  19   3  197.08   20.30
  -3  19   3  236.08   29.90
   3  19  -3  234.98   17.20
   2 -19  -3  498.65   25.40
  -2 -19   3  533.65   24.30
  -2  19   3  475.45   27.00
   2  19  -3  512.25   25.70
  -2  19   3  486.45   36.80
  -1 -19   3  409.26   22.30
   1 -19  -3  396.36   22.20
  -1  19   3  441.76   23.80
  -1  19   3  373.26   31.60
   1  19  -3  410.26   22.10
   0 -19  -3  400.16   22.10
   0  19   3  375.86   22.00
   0  19  -3  391.66   22.50
   0  19   3  368.26   30.50
   0  19  -3  391.96   21.40
  -1 -19  -3 1087.99   41.10
   1  19   3 1022.30   49.70
  -1  19  -3 1111.69   42.40
   1  19   3 1109.19   41.00
  -1  19  -3 1096.59   41.40
  -2 -19  -3   15.50    7.70
  -2  19  -3   24.70    9.00
  -2  19  -3   28.70    9.40
   2  19   3   25.40    8.10
   2  19   3   10.10   12.40
  -3 -19  -3  241.98   17.70
   3  19   3  266.27   24.00
   3  19   3  215.08   16.00
  -3  19  -3  224.48   20.20
  -3  19  -3  203.48   20.20
  -4 -19  -3  507.05   26.10
  -4  19  -3  482.25   28.20
   4  19   3  509.25   33.90
  -4  19  -3  502.25   29.10
   4  19   3  468.55   24.20
  -5  19  -3   12.90   11.40
   5  19   3    8.50   14.00
  -5  19  -3   13.10    9.90
  -6  19  -3  345.57   28.90
   6  19   3  339.27   32.40
  -7  19  -3   93.79   17.80
   7  19   3  110.79   25.30
   8 -20  -3   37.10   18.40
   8  20  -3   18.70   12.50
   7 -20  -3   12.20    9.80
  -7  20   3    1.30   23.10
   7  20  -3   10.00   10.10
   6 -20  -3    0.00    7.30
  -6  20   3    0.00   19.20
  -6  20   3    0.00   11.30
   6  20  -3    0.00    7.80
   5 -20  -3    0.00    7.80
  -5  20   3    0.00   18.20
   5  20  -3    8.50    8.70
  -5  20   3    5.40   11.20
   4 -20  -3  103.49   14.00
   4  20  -3   93.59   13.60
  -4  20   3   66.59   14.20
  -4  20   3  116.49   25.00
  -3 -20   3  234.88   16.50
   3 -20  -3  218.28   19.70
  -3  20   3  278.67   24.70
  -3  20   3  258.87   31.20
   3  20  -3  228.08   18.10
   2 -20  -3   54.59   10.60
  -2 -20   3   48.60    9.20
   2  20  -3   48.60    9.40
  -2  20   3   35.80   19.70
  -2  20   3   49.40   11.80
   1 -20  -3   17.30    7.90
  -1 -20   3    7.20    7.00
  -1  20   3   12.10    7.70
   1  20  -3    1.60    6.30
  -1  20   3    0.30   15.80
   0 -20  -3   40.30    9.60
   0  20   3   42.20   16.80
   0  20   3   33.50    9.20
   0  20  -3   30.90    8.90
  -1 -20  -3  201.08   18.00
  -1  20  -3  205.08   18.20
  -1  20  -3  208.48   19.40
   1  20   3  213.88   23.70
   1  20   3  222.68   16.80
  -2 -20  -3  661.23   29.60
  -2  20  -3  639.94   30.30
  -2  20  -3  620.44   30.70
   2  20   3  543.25   34.90
   2  20   3  612.54   28.20
  -3 -20  -3   76.99   12.20
  -3  20  -3   74.49   13.20
   3  20   3   73.29   11.50
  -3  20  -3  105.19   14.90
   3  20   3   89.89   17.30
  -4 -20  -3    6.80    7.60
  -4  20  -3    6.30    8.80
   4  20   3   17.50    8.30
  -4  20  -3   14.70   10.40
   4  20   3   23.20   13.60
  -5  20  -3    9.70   11.30
  -5  20  -3    0.00    8.40
   5  20   3    0.00   14.20
  -6  20  -3    6.20   10.00
   6  20   3   13.50   16.20
   7  20   3   19.80   19.00
   7 -21  -3   40.30   12.40
   7  21  -3   58.09   14.70
  -7  21   3   16.00   16.20
   6 -21  -3   36.70   11.80
   6  21  -3   69.29   14.80
  -6  21   3   58.09   24.80
  -6  21   3   70.79   17.90
   5 -21  -3  124.19   16.20
   5  21  -3   87.89   14.40
  -5  21   3  115.59   20.00
  -5  21   3   97.89   25.20
   4 -21  -3    7.30    8.50
   4  21  -3   31.20   10.10
  -4  21   3    2.80   18.90
  -4  21   3   17.80   10.80
   3 -21  -3   18.70    8.60
  -3 -21   3    0.00    5.80
  -3  21   3   32.30   18.80
  -3  21   3   16.10    9.10
   3  21  -3   11.10    6.90
   2 -21  -3  102.79   13.90
  -2 -21   3   46.50    9.80
   2  21  -3   60.59   10.90
  -2  21   3   54.89   12.00
  -2  21   3   58.39   20.70
   1 -21  -3   69.59   12.20
  -1 -21   3   71.19   11.40
  -1  21   3   74.89   19.60
   1  21  -3   54.39   10.30
  -1  21   3   65.79   12.10
   0 -21  -3  179.88   17.60
   0  21   3  180.38   24.00
   0  21   3  154.18   17.00
   0  21  -3  183.78   17.30
  -1 -21  -3  132.59   14.80
  -1  21  -3  166.78   16.60
   1  21   3  151.58   15.50
   1  21   3  164.78   21.60
  -1  21  -3  135.79   16.20
  -2 -21  -3  107.09   14.20
   2  21   3  117.59   18.80
   2  21   3   91.89   12.60
  -2  21  -3  107.69   14.40
  -2  21  -3  111.49   15.00
  -3 -21  -3    3.30    7.20
   3  21   3    0.00    6.90
  -3  21  -3    5.90    8.50
  -3  21  -3    0.00    7.40
   3  21   3   11.90   12.40
  -4 -21  -3   39.30   10.90
   4  21   3   35.80   14.80
  -4  21  -3   46.30   12.70
   4  21   3   44.90   10.90
  -4  21  -3   44.10   12.20
  -5  21  -3   22.10   12.30
  -5  21  -3   15.60   10.30
   5  21   3   36.60   16.80
  -6  21  -3  133.69   19.60
   6  21   3  106.39   24.10
   7 -22  -3   59.19   13.60
  -7  22   3   29.80   16.40
   7  22  -3   28.40   11.40
   6 -22  -3  566.64   30.70
  -6  22   3  438.66   34.10
   6  22  -3  504.65   30.70
   5 -22  -3   35.10   11.40
   5  22  -3   53.79   12.50
  -5  22   3   49.00   15.80
   4 -22  -3  117.79   15.90
   4  22  -3  149.59   17.10
  -4  22   3  112.49   25.70
  -4  22   3  103.89   17.20
   3 -22  -3  150.38   16.60
  -3 -22   3  151.58   14.80
  -3  22   3  154.38   27.20
   3  22  -3  161.38   16.90
  -3  22   3  128.59   17.70
   2 -22  -3    3.20    7.10
  -2 -22   3    0.00    6.30
  -2  22   3    0.10   17.20
   2  22  -3    4.50    6.80
  -2  22   3    0.00    7.50
  -1 -22   3  263.57   21.40
   1 -22  -3  268.27   19.40
   1  22  -3  268.17   18.70
  -1  22   3  244.18   19.80
  -1  22   3  259.57   29.50
   0 -22  -3  550.04   27.90
   0 -22   3  546.35   28.30
   0  22   3  557.34   36.90
   0  22  -3  568.24   27.90
   0  22   3  549.45   28.50
  -1 -22  -3    7.50    7.70
  -1  22  -3   16.20    9.20
   1  22   3   23.70    8.90
   1  22   3   26.00   13.80
  -1  22  -3    7.40    7.10
  -2 -22  -3  156.28   17.00
  -2  22  -3  165.88   18.10
   2  22   3  172.88   22.50
  -2  22  -3  138.89   17.40
   2  22   3  173.38   17.30
  -3 -22  -3   83.29   13.60
   3  22   3   62.19   16.30
   3  22   3   55.89   11.70
  -3  22  -3   56.09   13.10
  -3  22  -3   70.49   13.80
  -4 -22  -3   54.79   12.40
  -4  22  -3   97.59   16.10
   4  22   3   65.89   18.20
   4  22   3   86.99   13.70
  -4  22  -3   59.49   13.00
  -5  22  -3  711.63   37.00
   5  22   3  657.73   43.20
  -5  22  -3  678.93   38.50
  -6  22  -3   35.40   13.80
   6  22   3   70.29   21.50
   7 -23  -3   59.79   14.80
   7  23  -3   34.30   13.90
  -7  23   3   44.50   19.10
   6 -23  -3    2.10    9.00
   6  23  -3    2.30   10.00
  -6  23   3    0.00   13.00
   5 -23  -3  300.57   22.70
  -5  23   3  272.97   29.40
   5  23  -3  340.87   24.40
   4 -23  -3  230.08   21.30
  -4  23   3  181.08   22.50
   4  23  -3  200.28   20.70
   3 -23  -3  118.59   15.60
  -3 -23   3  168.48   16.00
  -3  23   3  126.59   18.40
   3  23  -3  144.59   16.70
  -2 -23   3  319.17   20.40
   2 -23  -3  311.07   21.60
  -2  23   3  282.97   25.30
   2  23  -3  320.97   21.20
  -1 -23   3   21.40    9.10
   1 -23  -3   17.10    8.40
   1  23  -3   35.70    9.90
  -1  23   3    1.30   17.10
  -1  23   3   15.00    9.30
   0 -23  -3  139.29   16.00
   0 -23   3  126.19   15.80
   0  23   3  141.29   22.30
   0  23  -3  118.49   15.00
   0  23   3  125.39   15.80
  -1 -23  -3  299.67   20.80
   1  23   3  286.57   28.30
   1  23   3  325.47   21.40
  -1  23  -3  303.37   21.30
  -2 -23  -3  118.99   15.10
   2  23   3  120.49   20.30
  -2  23  -3  101.29   16.10
   2  23   3  105.39   14.40
  -2  23  -3  106.69   15.60
  -3 -23  -3  448.26   25.80
  -3  23  -3  397.76   26.40
   3  23   3  465.65   25.40
   3  23   3  413.96   31.40
  -3  23  -3  373.16   26.10
  -4 -23  -3  343.77   23.50
  -4  23  -3  363.26   26.20
   4  23   3  322.07   29.40
  -4  23  -3  344.07   26.20
   4  23   3  354.56   22.50
  -5  23  -3    4.30   11.40
  -5  23  -3    3.20   11.00
   5  23   3   18.40   15.50
   6  23   3   72.09   21.90
  -6  23  -3  104.79   19.00
   7 -24  -3    1.90   10.50
  -7  24   3    7.00   16.50
   7  24  -3    2.50   10.40
   6 -24  -3   20.30    9.40
   6  24  -3   16.20    9.00
  -6  24   3    0.00   12.90
   5 -24  -3    6.30    9.20
  -5  24   3    0.00   10.40
   5  24  -3    2.50    9.00
   4 -24  -3  185.48   19.80
  -4  24   3  172.08   22.30
   4  24  -3  181.18   19.60
  -3 -24   3  450.65   24.00
   3 -24  -3  411.76   25.70
   3  24  -3  379.26   24.50
  -3  24   3  400.86   28.20
  -2 -24   3    0.00    7.00
   2 -24  -3    0.00    7.60
   2  24  -3   12.20    8.50
  -2  24   3    0.00    8.30
   1 -24  -3   32.80   10.00
  -1 -24   3   43.30   11.00
  -1  24   3   35.50   10.00
   1  24  -3   21.40    8.60
   0 -24  -3   29.30    9.70
   0 -24   3   22.00    9.90
   0  24  -3   16.30    9.30
   0  24   3   38.20   11.20
  -1 -24  -3   48.30   11.10
   1 -24   3   33.90   11.20
   1  24   3   33.00   10.70
  -1  24  -3   28.70   10.20
   1  24   3   68.19   17.40
  -2 -24  -3  235.48   21.30
  -2  24  -3  228.58   22.20
   2  24   3  242.18   19.20
   2  24   3  271.97   28.10
  -3 -24  -3  187.78   19.20
  -3  24  -3  160.88   20.00
   3  24   3  202.38   25.10
  -3  24  -3  206.08   21.40
   3  24   3  181.88   18.60
  -4 -24  -3   27.80   10.50
  -4  24  -3   25.20   12.50
   4  24   3   22.20   14.90
   4  24   3   27.50   10.60
  -4  24  -3    9.00   10.50
  -5  24  -3    5.50   10.90
  -5  24  -3   11.40   13.40
   5  24   3   19.60   16.30
   6  24   3   23.70   18.60
  -6  24  -3    0.00   11.50
   6 -25  -3   41.40   12.70
  -6  25   3   78.09   20.40
   6  25  -3   49.80   14.10
   5 -25  -3   68.49   14.40
  -5  25   3   75.09   18.10
   5  25  -3   96.19   15.80
   4 -25  -3   47.80   12.20
  -4  25   3   19.10   12.10
   4  25  -3   45.10   12.20
   3 -25  -3   16.40    8.60
  -3 -25   3    2.30    8.10
   3  25  -3    4.40    7.20
  -3  25   3    9.40   10.60
   2 -25  -3    0.00    7.40
  -2 -25   3   14.50    9.10
   2  25  -3    9.20    8.70
  -2  25   3    0.00    7.60
  -1 -25   3   20.40    9.70
   1 -25  -3   27.60    9.90
  -1  25   3   17.80   10.00
   1  25  -3   30.10   10.10
   0 -25   3    6.60    8.40
   0 -25  -3   20.20    9.50
   0  25  -3   14.10    8.20
   0  25   3   21.00    9.60
  -1 -25  -3   33.60   10.20
   1 -25   3    9.30    9.10
  -1  25  -3   51.79   12.10
   1  25   3   30.00   10.70
  -2 -25  -3    0.00    7.20
  -2  25  -3    0.00    8.50
   2  25   3    0.00    7.60
  -3 -25  -3    3.70    8.30
  -3  25  -3   14.30   11.00
   3  25   3    0.00    7.00
  -4 -25  -3   88.89   15.10
   4  25   3   67.89   18.80
   4  25   3  115.89   16.20
  -4  25  -3   72.99   16.70
  -4  25  -3   98.89   17.10
  -5  25  -3   68.39   16.90
   5  25   3   72.59   19.70
   6 -26  -3  160.98   21.10
   6  26  -3  227.98   24.20
  -6  26   3  179.58   27.80
   5 -26  -3   41.70   12.70
  -5  26   3   17.50   14.70
   5  26  -3   47.10   12.90
   4 -26  -3   67.29   13.30
  -4  26   3   79.69   17.30
   4  26  -3   59.29   13.40
  -3 -26   3  126.49   15.70
   3 -26  -3  138.49   17.20
  -3  26   3  151.98   20.90
   3  26  -3  141.69   17.20
   2 -26  -3   32.50   11.00
   2  26  -3   27.40   10.40
  -2  26   3   57.99   13.50
  -1 -26   3  153.08   17.20
   1 -26  -3  142.09   17.40
   1  26  -3  101.19   15.30
  -1  26   3  113.09   17.00
   0 -26  -3  268.97   23.40
   0 -26   3  262.97   23.70
   0  26   3  265.17   24.20
   0  26  -3  303.07   22.20
   1 -26   3    0.00    7.90
  -1 -26  -3   18.00    9.60
   1  26   3    0.00    8.30
  -1  26  -3    4.80    8.00
   2 -26   3  235.78   24.00
  -2 -26  -3  244.58   22.40
   2  26   3  255.27   22.80
  -2  26  -3  226.78   23.60
  -3 -26  -3   26.20   10.90
  -3  26  -3   28.40   12.30
   3  26   3   10.00   10.20
   4  26   3  232.28   22.40
  -4  26  -3  264.67   27.60
   6 -27  -3    6.00   11.50
  -6  27   3    6.80   15.40
   6  27  -3    0.60   10.70
   5 -27  -3  239.18   23.90
   5  27  -3  260.07   25.40
  -5  27   3  242.68   28.90
   4 -27  -3  392.56   26.90
   4  27  -3  374.16   26.30
  -4  27   3  417.76   31.40
   3 -27  -3   94.69   14.70
  -3 -27   3  118.39   15.60
   3  27  -3   97.09   15.50
  -3  27   3  111.19   18.30
   2 -27  -3  700.73   35.70
  -2 -27   3  739.33   34.50
  -2  27   3  719.93   38.40
   2  27  -3  658.33   34.10
   1 -27  -3    7.80    8.70
  -1 -27   3   19.50   10.10
  -1  27   3   22.00   10.90
   1  27  -3   13.10    9.00
   0 -27   3   69.89   13.90
   0 -27  -3   69.79   13.30
   0  27   3   64.79   14.70
   0  27  -3   84.39   14.60
  -1 -27  -3  174.68   19.50
   1 -27   3  194.28   21.30
   1  27   3  169.38   19.90
  -1  27  -3  170.08   19.90
   2 -27   3   70.99   14.80
  -2 -27  -3   90.69   15.20
   2  27   3  118.59   16.30
  -2  27  -3  105.79   17.30
   3 -27   3  344.27   26.50
  -3 -27  -3  346.67   25.10
  -3  27  -3  364.66   27.50
   3  27   3  380.26   25.40
   4 -27   3   65.99   16.20
  -4  27  -3   56.19   16.20
   4  27   3   74.39   15.40
   5 -27   3   43.50   15.60
   5 -28  -3   24.80   11.70
   5  28  -3   43.80   13.20
  -5  28   3   40.90   14.80
   4 -28  -3   50.99   13.80
  -4  28   3   55.69   15.20
   4  28  -3   49.50   13.00
   3 -28  -3  166.38   20.00
  -3 -28   3  189.18   19.20
   3  28  -3  172.58   20.00
  -3  28   3  158.98   22.10
   2 -28  -3   49.20   12.70
  -2 -28   3   64.89   13.30
  -2  28   3   32.00   12.30
   2  28  -3   39.80   11.40
   1 -28  -3   69.49   14.00
  -1 -28   3   70.59   14.40
   1  28  -3   60.29   13.60
  -1  28   3   57.29   13.50
   0 -28   3   15.70   10.10
   0 -28  -3    5.70    9.10
   0  28   3    0.00    9.00
   0  28  -3    0.00    8.20
   1 -28   3   19.00   10.80
  -1 -28  -3    0.00    7.70
   1  28   3   14.00   10.60
  -1  28  -3    2.60    9.10
  -2 -28  -3  306.37   25.80
   2 -28   3  253.97   25.70
  -2  28  -3  277.27   26.10
   2  28   3  277.07   25.00
   3 -28   3  175.58   21.70
  -3 -28  -3  184.28   20.60
   3  28   3  170.18   20.30
  -3  28  -3  159.68   21.50
   4 -28   3   51.59   12.70
   4  28   3   68.19   15.00
  -4  28  -3   42.80   16.50
   5 -29  -3  165.78   21.60
  -5  29   3  218.98   28.00
   5  29  -3  197.48   23.10
   4 -29  -3  125.19   18.00
   4  29  -3   86.39   15.50
  -4  29   3   91.69   19.40
   3 -29  -3   19.80   10.50
  -3  29   3   26.90   13.30
   3  29  -3    7.90    8.70
   2 -29  -3   32.30   12.10
  -2 -29   3   37.10   12.00
   2  29  -3   40.30   12.40
  -2  29   3   32.60   12.90
  -1 -29   3   26.80   11.10
   1 -29  -3   36.30   11.80
   1  29  -3   30.60   11.60
  -1  29   3   31.70   12.60
   0 -29  -3    0.00    7.90
   0 -29   3    0.20    9.30
   0  29  -3    7.00    7.50
   0  29   3    8.80   10.90
   1 -29   3   32.50   11.90
  -1 -29  -3    9.00    9.80
   1  29   3   20.50   11.90
  -1  29  -3   30.00   11.90
   2 -29   3    4.90    9.90
  -2 -29  -3    0.00    9.00
  -2  29  -3    2.00   11.10
   2  29   3    0.00    9.10
  -3 -29  -3   40.80   13.60
   3 -29   3   38.90   13.80
  -3  29  -3   28.70   13.80
   3  29   3   52.89   13.40
   4 -29   3   51.09   15.50
  -4  29  -3   30.40   15.80
   4  29   3   75.59   16.50
   4 -30  -3   44.70   13.70
   4  30  -3   45.20   14.10
  -4  30   3   56.89   18.00
   3 -30  -3  103.39   17.60
  -3  30   3  123.69   21.00
   3  30  -3  115.79   17.30
  -2 -30   3   63.39   14.10
   2 -30  -3   17.30   11.00
   2  30  -3   53.69   13.90
   1 -30  -3  393.66   27.60
  -1 -30   3  427.06   28.00
  -1  30   3  416.36   28.90
   1  30  -3  441.26   28.90
   0 -30  -3  275.57   25.70
   0 -30   3  332.47   25.00
   0  30  -3  309.47   24.60
   0  30   3  270.07   26.90
  -1 -30  -3   15.90   11.60
   1 -30   3    5.10    9.90
  -1  30  -3   11.80   11.40
   1  30   3   20.70   12.00
  -2 -30  -3  192.68   21.80
   2 -30   3  160.08   21.80
   2  30   3  161.08   20.20
  -2  30  -3  174.58   23.50
   3 -30   3    5.20   10.80
  -3 -30  -3    7.30   10.50
  -3  30  -3    8.90   13.40
   3  30   3    2.30   10.80
   4 -31  -3  303.57   28.20
  -4  31   3  258.87   30.00
   4  31  -3  232.58   24.80
   3 -31  -3   56.89   14.20
   3  31  -3   35.70   12.40
  -3  31   3   13.00   12.60
  -2 -31   3  207.08   22.10
   2 -31  -3  190.98   22.00
   2  31  -3  207.68   22.40
  -2  31   3  228.78   26.00
  -1 -31   3    3.80    9.80
   1 -31  -3    4.20   10.20
  -1  31   3   15.60   12.30
   1  31  -3    0.70   10.70
   0 -31   3  252.97   25.00
   0 -31  -3  276.27   26.30
   0  31  -3  255.77   25.30
   0  31   3  247.58   26.00
  -1 -31  -3  347.27   29.70
   1 -31   3  368.96   27.80
  -1  31  -3  325.27   29.50
   1  31   3  367.46   28.30
   2 -31   3   57.49   15.30
  -2 -31  -3   48.80   14.70
  -2  31  -3   63.69   16.50
   2  31   3   33.40   13.90
  -3 -31  -3  240.78   25.10
   3 -31   3  212.68   25.00
  -3  31  -3  214.38   26.80
   3  31   3  233.38   25.60
   3 -32  -3   12.50   11.80
  -3  32   3    3.50   13.60
   3  32  -3    0.00    7.80
   2 -32  -3    0.00   10.00
  -2 -32   3    3.00   10.70
  -2  32   3    8.70   12.60
   2  32  -3    0.00    9.20
  -1 -32   3   65.89   15.00
   1 -32  -3   73.59   15.80
  -1  32   3   66.09   16.10
   1  32  -3   77.69   16.50
   0 -32  -3  113.79   18.00
   0 -32   3   48.00   14.00
   0  32  -3  110.59   18.20
   0  32   3   72.29   16.80
   1 -32   3    0.00   10.20
  -1 -32  -3    0.00   10.40
   1  32   3    7.00   11.60
  -1  32  -3    2.80   11.60
   2 -32   3   37.40   14.30
  -2 -32  -3   29.60   13.70
  -2  32  -3   19.20   14.00
   2  32   3   37.00   15.20
  -2 -33   3   17.70   12.70
   2 -33  -3    0.00    9.70
   2  33  -3    6.10   10.40
  -2  33   3   11.80   12.10
  -1 -33   3    9.40   11.10
   1 -33  -3    0.70   10.50
  -1  33   3    6.50   12.50
   1  33  -3    0.00   10.10
   0 -33   3    8.50   11.00
   0 -33  -3    0.00   10.30
   0  33  -3   23.40   12.60
   0  33   3   11.90   12.80
  -1 -33  -3    4.40   10.50
   1 -33   3    0.50   11.30
   1  33   3    3.50   12.40
  -1  33  -3    5.30   11.60
  10   0  -4   51.69   18.40
   9   0  -4  588.24   38.00
   8   0  -4  385.26   29.20
  -8   0   4  377.06   41.80
   7   0  -4  236.78   24.90
  -7   0   4  247.78   33.40
   6   0  -4  181.18   20.60
  -6   0   4  161.28   27.00
   5   0  -4 1609.84   43.10
   5   0  -4 1624.24   59.19
  -5   0   4 1448.76   69.69
   4   0  -4    0.00    7.80
   4   0  -4    6.50    3.40
  -4   0   4   12.60   13.00
   3   0  -4 2419.36   77.79
  -3   0   4 2419.36   92.99
   3   0  -4 2539.15   66.99
   2   0  -4 2335.37   70.99
   2   0  -4 2238.58   63.29
  -2   0   4 2283.37   84.59
   1   0  -4  120.29   10.30
   1   0  -4  119.99   11.30
  -1   0   4  151.08   15.70
   0   0  -4 1965.70   59.39
   0   0   4 2225.58   73.39
   0   0  -4 1900.71   58.29
   1   0   4 3858.81  123.49
  -1   0  -4 3599.54  100.49
  -1   0  -4 3374.66   96.79
   2   0   4  210.68   16.10
  -2   0  -4  145.99   13.80
  -3   0  -4  613.24   27.00
   3   0   4  605.04   32.10
  -4   0  -4    4.10    6.80
   4   0   4    3.60    9.90
  -5   0  -4  658.43   30.70
   5   0   4  685.73   40.40
  -6   0  -4 1249.88   46.70
   6   0   4 1181.58   61.39
   7   0   4  198.98   29.90
   8   0   4  301.37   38.80
  10  -1  -4  123.19   22.40
  10   1  -4  126.79   22.60
   9  -1  -4  138.59   22.80
   9   1  -4  213.48   25.80
   8  -1  -4    1.10   11.00
  -8  -1   4   53.59   20.40
   8   1  -4   34.20   14.10
  -8   1   4   18.70   19.60
   7  -1  -4  143.19   20.50
  -7  -1   4  132.99   26.20
  -7   1   4  151.18   27.70
   7   1  -4  109.09   18.40
   6  -1  -4    6.40    9.30
  -6  -1   4   13.80   16.60
   6   1  -4   12.80   10.20
  -6   1   4   31.00   17.20
  -5  -1   4  172.48   24.60
   5  -1  -4  152.28    8.40
   5  -1  -4  130.29   17.20
  -5   1   4  167.08   23.70
   5   1  -4  132.29   17.30
   4  -1  -4  665.23   32.40
   4  -1  -4  750.32   22.80
  -4  -1   4  737.13   40.20
   4   1  -4  647.64   32.20
  -4   1   4  689.33   40.20
   4   1  -4  713.33   21.70
   3  -1  -4  187.38   10.50
   3  -1  -4  175.48   16.90
  -3  -1   4  233.78   22.70
   3   1  -4  165.58   16.30
  -3   1   4  279.37   24.90
   3   1  -4  191.58    9.90
  -2  -1   4  345.57   24.70
   2  -1  -4  328.97   19.50
   2  -1  -4  333.57   15.10
   2   1  -4  329.77   14.80
  -2   1   4  433.16   26.90
   2   1  -4  332.87   19.20
  -1  -1   4 1078.39   43.90
   1  -1  -4 1084.59   36.30
   1  -1  -4 1057.89   34.20
   1   1  -4 1027.90   33.80
  -1   1   4 1048.80   45.10
   1   1  -4 1070.49   35.80
   0  -1  -4   35.50    7.20
   0  -1  -4   45.10    6.50
   0  -1   4   41.10    9.40
   0   1   4   44.80    9.90
   0   1  -4   41.80    5.70
   0   1  -4   36.90    7.10
  -1  -1  -4 3785.42  106.89
   1  -1   4 4007.80  131.39
  -1  -1  -4 3938.81  103.69
   1  -1   4 3588.54  104.29
  -1   1  -4 3961.00  103.69
  -1   1  -4 3883.81  107.39
   1   1   4 3940.81  132.09
   2  -1   4  989.80   41.00
  -2  -1  -4  971.70   35.50
  -2   1  -4  960.90   35.30
   2   1   4  962.60   41.50
   3  -1   4   33.20   10.40
  -3  -1  -4   31.50    8.00
  -3   1  -4   29.40    8.40
   3   1   4   31.40   10.50
   4  -1   4   39.10   12.70
  -4  -1  -4   30.70    9.00
  -4   1  -4   27.00    8.30
   4   1   4   17.50   11.70
   5  -1   4   58.19   15.90
  -5  -1  -4   20.00    8.90
  -5   1  -4   27.50    9.10
   6  -1   4  149.29   24.00
  -6   1  -4  119.09   15.70
   7  -1   4  316.07   36.20
   7   1   4  351.06   37.80
   8  -1   4  116.79   27.20
   8   1   4  205.08   33.10
  10  -2  -4   39.40   17.70
  10   2  -4   48.90   17.70
   9  -2  -4   60.99   18.00
   9   2  -4   83.89   19.20
  -9   2   4   67.79   25.00
   8  -2  -4   19.50   14.10
  -8  -2   4   24.50   17.70
  -8   2   4   28.60   20.40
   8   2  -4    3.00   11.00
  -7  -2   4   19.40   16.80
   7  -2  -4    0.00    9.40
   7   2  -4    0.00    8.60
  -7   2   4   21.80   18.00
   6  -2  -4    0.00    8.60
  -6  -2   4    0.00   12.90
  -6   2   4   13.60   16.40
   6   2  -4    0.00    9.00
   5  -2  -4    5.80    3.40
   5  -2  -4    0.00    9.40
  -5  -2   4    5.00   13.90
  -5   2   4   14.80   14.50
   5   2  -4    7.20    8.40
  -4  -2   4  153.88   20.90
  -4  -2   4  153.28    6.90
   4  -2  -4  114.19   16.80
   4  -2  -4  150.68    9.00
  -4   2   4  168.38   22.40
   4   2  -4  152.48    7.70
   4   2  -4  144.79   17.00
   3  -2  -4  181.78   10.20
   3  -2  -4  157.88   16.20
  -3  -2   4  198.88   21.60
  -3   2   4  235.08   23.90
   3   2  -4  136.89   14.50
   3   2  -4  179.48    9.30
   2  -2  -4  428.56   22.30
   2  -2  -4  490.95   18.50
  -2  -2   4  435.86   28.00
  -2   2   4  527.25   30.40
   2   2  -4  442.16   21.50
   2   2  -4  464.55   17.50
  -1  -2   4   28.70   10.30
   1  -2  -4   30.90    7.40
   1  -2  -4   24.20    5.90
   1   2  -4   35.00    6.40
   1   2  -4   34.50    6.90
  -1   2   4   27.40   11.20
   0  -2  -4   38.10    7.20
   0  -2   4   51.69    9.30
   0  -2  -4   37.20    6.30
   0   2  -4   46.00    5.70
   0   2  -4   42.20    7.40
   0   2   4   35.50    9.80
  -1  -2  -4  194.78   14.00
  -1  -2  -4  187.88    8.90
   1  -2   4  197.18   14.90
  -1   2  -4  195.78   13.90
  -1   2  -4  195.08    7.70
   1   2   4  215.48   15.90
   2  -2   4  310.97   19.70
  -2  -2  -4  282.07   17.30
   2   2   4  334.07   21.10
  -2   2  -4  272.67   17.40
   3  -2   4   31.30    3.00
  -3  -2  -4   48.80    9.10
   3  -2   4   50.19   11.20
   3   2   4   38.70   11.40
  -3   2  -4   26.70    8.10
   4  -2   4   76.29   14.80
  -4  -2  -4   87.39   12.00
   4   2   4  102.29   17.20
  -4   2  -4   69.59   11.30
   5  -2   4   21.60   13.60
  -5  -2  -4   36.80    9.60
  -5   2  -4   37.60   10.00
   5   2   4   38.80   15.00
  -6  -2  -4   17.90    9.30
   6  -2   4   30.10   14.80
   6   2   4   31.40   15.00
  -6   2  -4    2.10    8.00
   7  -2   4  144.19   25.80
   7   2   4  123.69   24.60
   8  -2   4   32.10   20.50
   8   2   4   36.00   19.70
   9  -3  -4   74.79   18.90
   9   3  -4   99.19   27.20
   9   3  -4   57.29   16.70
  -9   3   4  124.99   27.10
   8  -3  -4   15.70   13.40
  -8  -3   4   16.70   17.40
   8   3  -4    0.00    9.70
  -8   3   4   88.69   24.70
   7  -3  -4   44.30   14.10
  -7  -3   4   34.30   18.70
  -7   3   4   54.89   20.60
   7   3  -4   38.60   13.10
  -6  -3   4   23.50   17.20
   6  -3  -4   17.80   11.50
   6   3  -4   21.60   10.70
  -6   3   4   25.50   18.10
  -5  -3   4   30.90   15.60
   5  -3  -4    0.00    8.70
   5  -3  -4    0.00    3.50
   5   3  -4    0.00    8.30
  -5   3   4   15.50   13.70
   4  -3  -4 1392.46   52.69
  -4  -3   4 1372.76   62.19
   4  -3  -4 1438.96   41.50
   4   3  -4 1485.05   52.79
  -4   3   4 1427.06   63.99
  -3  -3   4  164.48   19.10
   3  -3  -4  103.99   13.50
   3  -3  -4  114.19    8.80
  -3   3   4  139.49   19.60
   3   3  -4  117.79    8.20
   3   3  -4  117.29   14.00
   2  -3  -4  938.61   30.90
  -2  -3   4  920.21   42.20
   2  -3  -4  953.20   35.90
   2   3  -4  973.20   30.00
  -2   3   4  985.90   44.80
   2   3  -4  967.80   35.30
   1  -3  -4   85.69    8.80
   1  -3  -4   89.79    9.90
  -1  -3   4   89.29   12.40
   1   3  -4   75.69    8.30
  -1   3   4   94.49   14.40
   1   3  -4   79.69    9.20
   0  -3  -4  218.88   13.50
   0  -3  -4  199.98   11.70
   0  -3   4  200.48   15.30
   0   3  -4  204.38   10.80
   0   3  -4  201.98   13.40
   0   3   4  196.18   17.30
  -1  -3  -4 1054.59   29.30
  -1  -3  -4 1022.60   35.40
   1  -3   4  981.90   39.90
  -1   3  -4 1019.90   35.60
   1   3   4 1074.59   42.60
   1   3   4  968.90   30.40
  -1   3  -4 1024.80   29.60
   2  -3   4 1932.61   55.39
  -2  -3  -4 2063.69   62.29
   2  -3   4 2046.30   74.09
  -2   3  -4 1935.01   56.09
   2   3   4 2167.08   76.49
  -2   3  -4 2072.89   62.69
   3  -3   4    0.00    3.50
  -3  -3  -4    0.00    5.60
  -3  -3  -4    1.00    3.60
   3  -3   4   15.80    8.40
  -3   3  -4    0.00    5.50
   3   3   4    0.00    8.90
   4  -3   4  209.98   22.60
  -4  -3  -4  215.28   18.10
  -4   3  -4  200.88   17.50
   4   3   4  209.58   23.60
  -5  -3  -4    5.60    7.30
   5  -3   4   50.59   15.20
  -5   3  -4   14.70    8.50
   5   3   4    8.10   12.50
  -6  -3  -4  135.59   16.60
   6  -3   4  219.48   26.30
   6   3   4  132.29   23.70
  -6   3  -4  147.49   16.40
   7  -3   4  461.45   37.90
   7   3   4  478.75   39.20
   8  -3   4   93.99   25.40
   8   3   4   99.79   26.00
   9  -4  -4  288.27   30.70
  -9   4   4  309.37   39.90
   9   4  -4  235.58   37.00
   9   4  -4  284.57   29.40
   8  -4  -4  519.45   34.30
   8   4  -4  473.85   31.50
  -8   4   4  412.56   40.10
  -7  -4   4   61.39   20.80
   7  -4  -4   51.29   14.70
   7   4  -4   57.89   14.30
  -7   4   4   80.89   22.60
  -6  -4   4   96.99   21.70
   6  -4  -4  125.89   17.90
  -6   4   4   95.79   22.60
   6   4  -4   94.19   15.60
   5  -4  -4  789.52   26.10
   5  -4  -4  742.03   36.80
  -5  -4   4  782.32   45.20
  -5   4   4  785.02   45.90
   5   4  -4  804.12   36.70
   4  -4  -4   38.30   11.00
   4  -4  -4   45.50    6.10
  -4  -4   4   84.29   17.30
   4   4  -4   36.70    9.70
  -4   4   4   72.89   17.80
  -3  -4   4 3614.34  130.99
   3  -4  -4 3698.13  111.39
   3  -4  -4 3739.13   99.49
  -3   4   4 3826.12  134.69
   3   4  -4 3641.54   96.69
   3   4  -4 3694.43  110.19
  -2  -4   4 1163.08   49.99
   2  -4  -4 1249.97   43.10
   2  -4  -4 1220.48   37.90
  -2   4   4 1239.68   53.29
   2   4  -4 1229.68   36.60
   2   4  -4 1214.08   42.20
  -1  -4   4  575.44   27.90
   1  -4  -4  602.44   24.00
   1  -4  -4  536.35   21.90
   1   4  -4  562.34   22.40
  -1   4   4  600.94   31.50
   1   4  -4  559.54   21.80
   0  -4   4 1510.25   55.99
   0  -4  -4 1552.54   47.80
   0   4   4 1592.54   47.10
   0   4   4 1556.24   59.39
   0   4  -4 1565.94   48.00
   0   4  -4 1509.65   45.70
   1  -4   4 2037.40   73.49
  -1  -4  -4 2149.78   62.69
   1   4   4 2130.49   76.69
  -1   4  -4 2120.69   58.29
  -1   4  -4 2028.50   62.59
   1   4   4 2073.99   58.89
  -2  -4  -4  200.48   14.60
   2  -4   4  210.98   16.20
   2   4   4  222.48   18.40
  -2   4  -4  234.88   15.70
  -2   4  -4  204.38    9.50
   2   4   4  204.58    8.20
   3  -4   4 1144.69   47.70
  -3  -4  -4 1106.39   39.80
  -3   4  -4 1159.88   40.80
   3   4   4 1061.69   31.50
   3   4   4 1108.09   49.30
  -4  -4  -4   44.00   10.00
   4  -4   4   70.69   14.20
   4  -4   4   46.20    6.90
   4   4   4   42.20   13.70
  -4   4  -4   31.50    9.30
  -5  -4  -4  468.45   24.40
   5  -4   4  424.16   31.30
  -5   4  -4  455.75   25.70
   5   4   4  422.66   32.30
   6  -4   4  524.45   37.80
  -6  -4  -4  634.54   30.40
   6   4   4  537.75   39.10
  -6   4  -4  580.94   29.80
   7  -4   4  136.59   24.10
   7   4   4  159.28   27.20
   8  -4   4  233.18   34.10
   8   4   4  205.48   32.10
   9  -5  -4  320.67   32.80
  -9   5   4  333.37   42.20
   9   5  -4  362.46   43.70
   9   5  -4  406.26   31.00
   8  -5  -4   98.59   19.30
   8   5  -4   76.99   17.00
  -8   5   4  119.89   27.00
   7  -5  -4  288.47   27.70
  -7  -5   4  229.98   31.30
   7   5  -4  275.57   25.70
  -7   5   4  251.97   33.80
   6  -5  -4   11.30    5.20
   6  -5  -4   12.20    9.70
  -6  -5   4    7.10   15.50
  -6   5   4    0.00   16.00
   6   5  -4    0.00    8.30
   5  -5  -4 1175.28   48.40
  -5  -5   4 1146.69   56.99
   5  -5  -4 1170.88   36.40
   5   5  -4 1157.18   46.70
  -5   5   4 1204.08   59.39
   4  -5  -4 1280.97   38.70
  -4  -5   4 1305.97   57.59
   4  -5  -4 1251.57   49.00
  -4   5   4 1201.68   58.89
   4   5  -4 1267.27   47.80
   3  -5  -4 1437.66   42.40
  -3  -5   4 1400.46   58.49
   3  -5  -4 1383.96   50.39
   3   5  -4 1409.96   39.60
   3   5  -4 1355.66   48.90
  -3   5   4 1408.86   61.59
   2  -5  -4    9.90    4.80
  -2  -5   4    9.10   10.40
   2  -5  -4   13.40    6.90
   2   5  -4   11.20    4.50
  -2   5   4   13.70   12.40
   2   5  -4   15.10    6.60
   1  -5  -4 1366.66   44.00
  -1  -5   4 1497.85   54.09
   1   5  -4 1407.26   43.40
  -1   5   4 1488.25   58.39
   1   5  -4 1399.16   45.30
  -1   5   4 1453.15   47.00
   0  -5  -4  165.78   12.50
   0  -5   4  176.48   14.30
   0   5  -4  201.48   10.60
   0   5  -4  181.78   12.90
   0   5   4  219.28   18.40
   0   5   4  189.88   12.00
   1  -5   4 1105.19   42.20
  -1  -5  -4 1126.29   37.80
   1   5   4 1094.09   33.40
  -1   5  -4 1027.20   37.40
  -1   5  -4 1144.29   33.00
   1   5   4 1113.59   45.70
   2  -5   4  675.53   30.30
  -2  -5  -4  680.43   27.30
   2   5   4  670.33   20.70
  -2   5  -4  685.23   27.90
   2   5   4  676.13   33.00
  -2   5  -4  620.04   21.60
  -3  -5  -4    0.00    5.60
   3  -5   4    5.00    7.70
   3   5   4    6.00    8.70
   3   5   4    6.10    2.70
  -3   5  -4   17.40    7.60
  -3   5  -4   10.20    4.90
   4  -5   4   77.09    8.70
   4  -5   4  106.69   16.10
  -4  -5  -4   88.29   12.30
  -4   5  -4   89.19   13.00
   4   5   4   76.09   16.00
  -5  -5  -4   21.00    8.70
   5  -5   4   18.00   12.50
   5   5   4   50.39   15.50
  -5   5  -4    2.90    7.60
   6  -5   4  191.18   26.50
  -6  -5  -4  212.98   19.20
  -6   5  -4  200.88   19.80
   6   5   4  253.17   29.30
   7  -5   4  434.16   36.40
   7   5   4  455.75   38.40
   8  -5   4  149.49   28.00
   8   5   4  227.68   35.40
   9  -6  -4   26.10   15.90
   9   6  -4   88.79   26.30
   9   6  -4   53.59   16.20
  -9   6   4   28.40   22.10
   8  -6  -4  134.79   21.80
  -8   6   4  174.88   30.60
   8   6  -4  131.19   26.90
   8   6  -4  109.29   18.30
  -7  -6   4   36.30   17.90
   7  -6  -4    0.00   10.90
  -7   6   4    1.00   18.00
   7   6  -4    9.50   10.20
   6  -6  -4   85.59    9.40
  -6  -6   4   87.29   21.30
   6  -6  -4   70.59   15.10
   6   6  -4   78.09   14.30
  -6   6   4   78.79   22.70
  -5  -6   4   50.69   16.70
   5  -6  -4   64.89    7.90
   5  -6  -4   64.79   13.60
  -5   6   4   83.59   20.10
   5   6  -4   48.20   12.50
   4  -6  -4    0.00    7.20
   4  -6  -4    1.50    3.80
  -4  -6   4    0.00   12.20
   4   6  -4    0.00    6.10
  -4   6   4   12.20   13.80
  -3  -6   4    7.90   10.90
   3  -6  -4    6.50    4.20
   3  -6  -4    0.00    7.50
  -3   6   4    4.60   13.00
   3   6  -4    6.10    7.10
   3   6  -4    8.30    3.60
   2  -6  -4  144.29   10.80
  -2  -6   4  174.68   17.10
  -2   6   4  150.58   19.40
   2   6  -4  148.19   10.30
   2   6  -4  138.39   12.90
  -1  -6   4  194.68   16.30
   1  -6  -4  163.68   11.80
  -1   6   4  196.38   19.70
  -1   6   4  160.08   13.20
   1   6  -4  165.78   11.90
   1   6  -4  177.48   12.10
   0  -6  -4   28.20    6.70
   0  -6   4   40.90    8.20
   0   6   4   33.30   10.60
   0   6  -4   33.60    5.40
   0   6  -4   32.60    7.10
   0   6   4   33.70    6.10
  -1  -6  -4  360.06   18.50
   1  -6   4  351.46   18.40
  -1   6  -4  339.87   18.80
   1   6   4  391.56   23.10
   1   6   4  367.56   14.80
  -1   6  -4  364.56   14.10
   2  -6   4    6.70    6.40
  -2  -6  -4   14.50    6.10
  -2   6  -4    0.00    5.30
  -2   6  -4    1.30    3.30
   2   6   4    0.00    7.40
   2   6   4    8.80    3.20
  -3  -6  -4    0.00    4.70
   3  -6   4    0.00    7.10
  -3   6  -4    0.00    4.50
   3   6   4    2.90    8.70
  -3   6  -4    0.00    4.50
   3   6   4    1.10    2.80
   4  -6   4  190.38   13.20
  -4  -6  -4  228.48   16.90
   4  -6   4  222.98   20.40
  -4   6  -4  197.38   18.30
   4   6   4  205.58   23.30
   5  -6   4   65.49   16.90
  -5  -6  -4   86.79   12.90
   5   6   4   55.49   17.20
  -5   6  -4   88.19   13.30
   6  -6   4   14.70   14.00
   6   6   4   19.20   14.60
  -6   6  -4    0.00    7.70
   7  -6   4   38.80   17.70
  -7   6  -4   39.40   11.90
   7   6   4  104.99   22.70
   8  -6   4    0.00   18.00
   8   6   4   26.90   18.90
   9  -7  -4  109.09   21.60
   9   7  -4   79.39   17.90
   9   7  -4   41.40   22.80
  -9   7   4   79.59   27.00
   8  -7  -4    5.80   12.00
   8   7  -4    7.90   17.80
   8   7  -4    6.50   11.10
  -8   7   4   37.00   20.20
   7  -7  -4   55.89   15.50
  -7   7   4   34.20   21.50
   7   7  -4   45.20   12.70
   6  -7  -4  346.17   26.20
  -6  -7   4  373.26   33.00
   6  -7  -4  379.06   18.10
  -6   7   4  366.36   38.50
   6   7  -4  396.56   26.20
  -5  -7   4   97.19   20.60
   5  -7  -4  121.29   10.90
   5  -7  -4  121.29   17.10
   5   7  -4  120.09   16.00
  -5   7   4  115.29   22.90
   4  -7  -4  958.60   31.80
  -4  -7   4  943.01   47.00
   4  -7  -4  865.91   39.30
  -4  -7   4  947.11   26.40
  -4   7   4  972.60   49.90
   4   7  -4  921.11   38.40
  -3  -7   4  161.18   18.50
   3  -7  -4  111.89   10.40
   3  -7  -4  127.79   15.20
   3   7  -4  136.89    8.80
   3   7  -4  120.99   13.40
  -3   7   4  135.99   21.20
   2  -7  -4  714.83   26.00
  -2  -7   4  681.53   33.20
  -2   7   4  746.13   39.00
   2   7  -4  692.33   24.30
   2   7  -4  722.83   28.90
  -2   7   4  755.42   31.40
  -1  -7   4    1.10    7.80
   1  -7  -4    0.00    4.00
   1   7  -4    2.00    4.70
  -1   7   4    0.00   10.40
   1   7  -4    1.00    4.60
  -1   7   4    1.30    5.40
   0  -7  -4  176.28   12.70
   0  -7   4  151.48   13.20
   0   7   4  176.88   11.30
   0   7  -4  184.48   13.40
   0   7  -4  176.38   10.80
   0   7   4  156.88   17.00
   1  -7   4 1602.44   57.59
  -1  -7  -4 1646.04   51.19
  -1   7  -4 1598.24   51.69
   1   7   4 1611.34   47.90
  -1   7  -4 1594.84   47.60
   1   7   4 1648.94   62.89
   2  -7   4  510.35   24.80
  -2  -7  -4  520.55   23.20
  -2   7  -4  494.15   24.30
   2   7   4  527.55   17.80
  -2   7  -4  496.85   18.90
   2   7   4  508.25   28.40
   3  -7   4   32.00    9.70
  -3  -7  -4   33.20    7.70
   3   7   4   39.50   11.70
  -3   7  -4   16.20    7.90
   3   7   4   28.10    4.40
  -4  -7  -4  312.57   19.40
   4  -7   4  259.77   22.50
   4   7   4  308.37   25.50
  -4   7  -4  315.27   20.30
  -4   7  -4  332.77   18.40
  -5  -7  -4   36.00    9.90
   5   7   4   34.10   15.10
  -5   7  -4   27.20   10.00
   6  -7   4   73.79   17.80
  -6   7  -4   44.40   12.10
   6   7   4   35.00   17.00
   7  -7   4  285.77   34.90
  -7   7  -4  330.77   26.90
   7   7   4  280.67   35.20
   8  -7   4   36.70   19.30
   8   7   4    0.00   18.20
   9  -8  -4  122.59   22.70
  -9   8   4  120.09   30.30
   9   8  -4  117.79   28.60
   9   8  -4  108.39   19.80
   8  -8  -4  259.47   28.50
   8   8  -4  304.27   28.30
   8   8  -4  258.57   35.10
  -8   8   4  219.38   34.80
   7  -8  -4   38.30   14.40
  -7   8   4   56.29   22.50
   7   8  -4   18.50    9.80
   6  -8  -4  147.59   20.30
  -6  -8   4  155.58   25.30
   6  -8  -4  150.78   12.90
   6   8  -4  147.89   18.20
  -6   8   4  160.58   29.20
   5  -8  -4  278.57   25.10
  -5  -8   4  262.77   27.90
   5  -8  -4  236.68   14.60
  -5   8   4  264.07   30.90
   5   8  -4  238.28   22.00
  -4  -8   4  142.79   20.00
   4  -8  -4  119.99   15.70
   4  -8  -4  114.59   10.80
  -4   8   4  168.08   24.40
   4   8  -4  124.39   15.10
  -3  -8   4 2757.12  102.99
   3  -8  -4 2834.82   80.19
   3   8  -4 2694.63   87.09
  -3   8   4 3034.20  109.29
   3   8  -4 2888.01   76.39
  -3   8   4 2840.22   90.49
  -2  -8   4 1173.08   48.10
   2  -8  -4 1228.18   39.20
   2   8  -4 1190.68   42.00
  -2   8   4 1164.68   43.50
  -2   8   4 1276.07   54.79
   2   8  -4 1202.48   37.30
  -1  -8   4  114.29   11.90
   1  -8  -4  110.29   10.50
   1   8  -4  121.09   10.80
  -1   8   4  126.69   17.50
   1   8  -4  113.99   10.50
  -1   8   4   99.89   11.10
   0  -8  -4 1661.63   52.79
   0  -8   4 1674.63   60.09
   0   8  -4 1765.82   52.09
   0   8  -4 1663.03   52.79
   0   8   4 1745.13   52.79
   0   8   4 1810.62   66.89
  -1  -8  -4  240.38   15.30
   1  -8   4  234.68   14.30
  -1   8  -4  242.18   11.90
  -1   8  -4  245.48   16.00
   1   8   4  272.07   20.20
   1   8   4  245.38   12.20
   2  -8   4  258.77   16.50
  -2  -8  -4  236.98   15.90
   2   8   4  258.17   20.60
   2   8   4  256.97   11.70
  -2   8  -4  269.97   12.90
  -2   8  -4  269.77   17.50
  -3  -8  -4  815.62   31.50
   3  -8   4  779.12   35.90
   3   8   4  748.93   25.20
  -3   8  -4  775.92   32.80
  -3   8  -4  820.82   28.90
   3   8   4  746.73   39.10
   4  -8   4   18.60   10.60
  -4  -8  -4    9.70    7.00
   4   8   4   14.60   11.80
  -4   8  -4   12.70    6.40
  -4   8  -4    7.70    7.80
  -5  -8  -4  903.41   35.70
   5  -8   4  801.92   44.30
   5   8   4  789.82   46.00
  -5   8  -4  882.41   37.70
   6  -8   4  273.37   30.90
  -6   8  -4  271.27   23.80
   6   8   4  235.98   30.10
   7  -8   4   19.20   16.40
   7   8   4   61.39   20.30
  -7   8  -4   16.00   10.60
   8  -8   4   84.79   25.20
   8   8   4  106.79   27.20
   9  -9  -4  256.47   30.00
   9   9  -4  208.48   25.30
   9   9  -4  222.38   35.00
  -9   9   4  147.59   33.40
   8  -9  -4    0.00   12.00
   8   9  -4   39.20   19.60
  -8   9   4    8.80   21.20
   8   9  -4   31.60   13.60
   7  -9  -4  355.76   31.90
  -7   9   4  354.66   40.60
   7   9  -4  351.06   24.90
   7   9  -4  322.77   36.80
   6  -9  -4   74.09   15.60
   6  -9  -4   72.99    9.80
  -6  -9   4   74.39   20.30
   6   9  -4   69.69   14.50
  -6   9   4   72.59   22.00
   5  -9  -4  768.82   37.70
  -5  -9   4  774.52   43.20
   5  -9  -4  748.83   28.60
   5   9  -4  783.52   35.90
  -5   9   4  697.23   45.30
  -4  -9   4 1525.55   64.89
   4  -9  -4 1535.45   47.70
   4  -9  -4 1593.44   57.59
  -4  -9   4 1523.65   42.00
  -4   9   4 1382.56   67.49
   4   9  -4 1592.64   55.29
   3  -9  -4 1195.88   38.80
  -3  -9   4 1165.48   50.79
   3   9  -4 1191.18   35.40
   3   9  -4 1055.29   42.30
  -3   9   4 1337.47   58.09
  -3   9   4 1130.49   45.80
  -2  -9   4   82.69   12.50
   2  -9  -4   74.59    9.40
   2   9  -4   77.29    8.30
   2   9  -4   82.19   10.20
  -2   9   4   75.89   16.90
  -2   9   4   76.49   11.50
  -1  -9   4  937.51   36.20
   1  -9  -4  824.32   31.50
  -1   9   4  911.71   43.70
   1   9  -4  918.61   32.20
   1   9  -4  903.41   31.60
  -1   9   4  942.41   34.00
   0  -9  -4 1210.58   41.30
   0  -9   4 1194.48   44.90
   0   9  -4 1271.77   41.70
   0   9   4 1316.37   41.20
   0   9  -4 1257.57   40.00
   0   9   4 1247.98   52.19
   1  -9   4  390.56   18.10
  -1  -9  -4  361.96   18.90
   1   9   4  339.77   23.70
  -1   9  -4  366.26   15.90
   1   9   4  384.36   16.20
  -1   9  -4  373.06   19.80
   2  -9   4 1506.25   56.49
  -2  -9  -4 1582.44   50.19
   2   9   4 1498.45   61.59
  -2   9  -4 1486.75   46.80
  -2   9  -4 1547.75   51.19
   2   9   4 1551.64   45.80
   3  -9   4  619.64   30.90
  -3  -9  -4  623.04   27.30
   3   9   4  625.34   22.10
   3   9   4  652.23   35.30
  -3   9  -4  629.94   25.00
  -3   9  -4  678.03   29.60
  -4  -9  -4  667.53   29.40
   4  -9   4  606.24   34.70
  -4   9  -4  705.03   28.80
  -4   9  -4  672.03   31.30
   4   9   4  671.13   38.60
   5  -9   4  267.07   25.10
  -5  -9  -4  317.27   20.60
   5   9   4  369.86   29.50
  -5   9  -4  282.07   21.50
   6  -9   4  338.87   30.10
   6   9   4  374.86   32.80
  -6   9  -4  329.57   23.30
   7  -9   4  248.38   32.10
  -7   9  -4  258.47   24.20
   7   9   4  237.78   32.70
   8  -9   4   43.80   22.20
   8   9   4   60.29   23.50
   9 -10  -4    0.00   14.80
   9  10  -4   71.99   23.00
  -9  10   4   26.90   23.70
   9  10  -4   45.60   15.60
   8 -10  -4   60.29   16.90
   8  10  -4   80.89   24.60
  -8  10   4   60.69   26.30
   8  10  -4   62.79   15.80
   7 -10  -4   12.80   12.20
  -7  10   4   14.80   19.10
   7  10  -4   21.60   16.90
   7  10  -4    3.00    9.70
   6 -10  -4  201.38   14.70
   6 -10  -4  261.37   25.70
   6  10  -4  220.28   22.20
  -6  10   4  197.38   30.00
  -5 -10   4   72.29   18.10
   5 -10  -4   68.69    9.60
   5 -10  -4   59.19   13.80
  -5  10   4  115.69   23.10
   5  10  -4   94.79   14.60
  -4 -10   4   85.99   17.20
  -4 -10   4   87.99    7.00
   4 -10  -4  104.59   11.10
  -4  10   4  105.59   22.10
   4  10  -4   91.89   13.40
  -3 -10   4   40.40   12.10
   3 -10  -4   35.50    7.50
  -3  10   4   37.50   10.70
   3  10  -4   40.10    8.50
  -3  10   4   49.10   17.10
   3  10  -4   53.09    6.50
  -2 -10   4  133.79   14.30
   2 -10  -4  131.79   11.80
   2  10  -4  132.69   12.80
  -2  10   4  135.39   20.40
   2  10  -4  120.29   10.50
  -2  10   4  118.69   14.30
   1 -10  -4   75.89    9.50
  -1 -10   4   65.89    9.70
  -1  10   4   72.39   15.80
   1  10  -4   69.89    9.10
  -1  10   4   91.99   11.00
   1  10  -4   75.69    9.00
   0 -10  -4  198.18   13.50
   0 -10   4  181.28   13.20
   0  10   4  180.48   12.70
   0  10  -4  185.18   11.80
   0  10  -4  189.38   14.20
   0  10   4  188.88   19.50
  -1 -10  -4  116.89   12.30
   1 -10   4  108.59    9.90
   1  10   4   86.89   14.30
   1  10   4  107.09    9.70
  -1  10  -4  101.79    9.20
  -1  10  -4  128.99   13.20
   2 -10   4    9.30    6.30
  -2 -10  -4    2.20    5.10
  -2  10  -4   11.40    6.10
   2  10   4    0.50    3.70
  -2  10  -4    4.40    4.30
   2  10   4   11.90    9.30
  -3 -10  -4    3.00    5.90
   3 -10   4    0.00    7.40
   3  10   4    5.70    4.10
  -3  10  -4    6.30    5.60
   3  10   4    0.00    9.20
  -3  10  -4    0.40    6.50
  -4 -10  -4   12.50    6.60
   4 -10   4   36.20   12.00
   4  10   4   28.10   12.40
  -4  10  -4   20.50    9.20
  -4  10  -4   26.90    8.40
  -5 -10  -4  302.27   20.30
   5 -10   4  280.57   25.40
   5  10   4  327.67   28.50
  -5  10  -4  311.97   22.10
   6 -10   4   86.29   19.40
  -6  10  -4   80.59   14.60
   6  10   4  115.89   22.60
   7 -10   4    9.30   15.10
  -7  10  -4   14.20   10.90
   7  10   4   61.09   19.00
   8 -10   4   11.10   18.60
   8  10   4   20.30   19.10
   9 -11  -4   49.60   18.00
   9  11  -4   52.19   15.70
   9  11  -4   31.00   20.00
  -9  11   4   63.09   26.60
   8 -11  -4    0.00   12.00
   8  11  -4   38.30   19.90
   8  11  -4    0.00   11.20
  -8  11   4   55.99   24.50
   7 -11  -4  117.29   20.60
   7  11  -4  146.59   20.20
   7  11  -4  171.68   27.60
  -7  11   4  138.99   29.70
   6 -11  -4   87.79   11.10
   6 -11  -4   97.49   17.40
  -6  11   4   76.79   23.10
   6  11  -4  109.69   16.10
   6  11  -4   79.79   20.40
   5 -11  -4   53.19   13.20
   5 -11  -4   63.69    9.60
  -5  11   4   56.29   21.00
   5  11  -4   60.79   12.10
   4 -11  -4  126.89   12.30
  -4 -11   4  108.19    8.10
  -4 -11   4  111.99   18.70
  -4  11   4  163.98   25.50
   4  11  -4   96.79   13.30
  -4  11   4  154.98   18.80
  -3 -11   4  360.76   24.80
   3 -11  -4  321.87   17.50
  -3  11   4  344.47   22.20
   3  11  -4  348.67   15.40
  -3  11   4  301.47   28.90
   3  11  -4  331.37   20.00
   2 -11  -4   24.50    6.80
  -2 -11   4   28.20    9.60
   2  11  -4   32.00    7.40
   2  11  -4   28.20    6.00
  -2  11   4   20.30    7.70
  -2  11   4   27.30   14.90
   1 -11  -4  505.25   22.50
  -1  11   4  562.94   24.50
  -1  11   4  540.15   32.80
   1  11  -4  539.45   22.70
   1  11  -4  487.75   22.00
   0 -11  -4   21.40    6.80
   0  11   4   18.30   11.10
   0  11  -4   25.30    5.00
   0  11  -4   22.30    7.00
   0  11   4   25.80    6.60
   0  11  -4   26.10    6.10
  -1 -11  -4  271.67   16.60
   1 -11   4  257.87   14.00
  -1  11  -4  249.97   17.30
   1  11   4  236.08   20.80
  -1  11  -4  292.57   14.40
   1  11   4  273.37   14.40
   2 -11   4  167.28   13.30
  -2 -11  -4  185.88   15.50
  -2  11  -4  203.18   12.70
  -2  11  -4  180.88   17.50
   2  11   4  190.48   11.60
   2  11   4  193.08   20.30
   3 -11   4  111.99   14.20
  -3 -11  -4  123.79   13.40
  -3  11  -4  144.19   16.10
   3  11   4  117.59   18.40
  -3  11  -4  137.09   12.40
   3  11   4  111.59    9.70
   4 -11   4  165.08   19.90
  -4 -11  -4  204.28   17.30
  -4  11  -4  200.28   16.10
   4  11   4  177.58   22.60
  -4  11  -4  219.08   20.20
   5 -11   4  140.29   20.20
  -5 -11  -4   83.59   12.90
  -5  11  -4  147.49   17.10
   5  11   4  142.19   22.60
   6 -11   4   21.10   14.50
   6  11   4    0.00   12.60
  -6  11  -4   30.10   11.10
   7 -11   4   87.49   22.60
  -7  11  -4   78.39   16.00
   7  11   4  116.39   25.40
   9 -12  -4   33.00   17.40
  -9  12   4  115.79   30.40
   9  12  -4   64.19   16.40
   9  12  -4   56.79   24.20
   8 -12  -4  526.95   36.60
  -8  12   4  473.95   50.99
   8  12  -4  463.35   40.10
   8  12  -4  480.35   32.30
   7 -12  -4  111.49   19.80
  -7  12   4  177.08   31.20
   7  12  -4   80.69   22.10
   7  12  -4  140.99   19.60
   6 -12  -4  456.25   22.80
   6 -12  -4  465.05   30.90
  -6  12   4  440.46   39.50
   6  12  -4  439.76   35.60
   6  12  -4  493.65   28.90
   5 -12  -4  247.48   24.60
   5 -12  -4  244.58   16.10
   5  12  -4  272.77   20.30
  -5  12   4  271.97   32.80
  -4 -12   4   81.59   16.60
  -4 -12   4   49.99    6.10
   4 -12  -4   59.59    9.50
   4  12  -4   63.69   11.20
  -4  12   4   72.89   14.20
  -4  12   4   85.39   21.80
  -3 -12   4  288.57   22.80
   3 -12  -4  312.87   17.50
   3  12  -4  300.27   19.20
   3  12  -4  295.07   14.70
  -3  12   4  324.77   22.60
  -3  12   4  356.26   31.50
  -2 -12   4 1083.29   43.00
   2 -12  -4 1067.49   37.70
  -2  12   4 1016.50   40.90
  -2  12   4 1060.69   51.89
   2  12  -4 1072.89   39.20
   2  12  -4 1115.89   36.00
   1 -12  -4   28.60    6.80
   1  12  -4   24.20    6.90
   1  12  -4   31.80    7.10
  -1  12   4   29.40   13.70
  -1  12   4   24.00    7.70
   0 -12  -4 1438.46   48.60
   0  12   4 1442.96   61.19
   0  12   4 1535.15   49.20
   0  12  -4 1520.95   48.10
   0  12  -4 1574.94   49.90
  -1 -12  -4    0.70    5.00
   1 -12   4    7.00    5.00
   1  12   4    0.00    8.60
   1  12   4    0.00    4.50
  -1  12  -4    0.00    5.10
  -1  12  -4    6.80    4.80
   2 -12   4   62.99    9.10
  -2 -12  -4   70.39   10.60
   2  12   4   75.99   13.50
   2  12   4   71.29    8.20
  -2  12  -4   68.89    8.90
  -2  12  -4   71.59   11.80
   3 -12   4  724.63   34.10
  -3 -12  -4  747.73   31.20
   3  12   4  688.23   38.70
  -3  12  -4  732.03   33.00
   3  12   4  783.12   27.20
  -3  12  -4  783.02   30.00
  -4 -12  -4  330.47   20.50
   4 -12   4  332.77   24.70
   4  12   4  335.57   27.60
  -4  12  -4  359.56   21.10
  -4  12  -4  319.97   22.00
   5 -12   4  723.33   40.90
  -5 -12  -4  771.72   33.30
  -5  12  -4  742.23   35.50
   5  12   4  777.02   45.00
   6 -12   4  464.35   34.50
  -6  12  -4  516.95   29.10
   6  12   4  404.06   35.00
   7 -12   4   22.60   16.50
   7  12   4   14.00   17.00
  -7  12  -4   29.50   12.50
   9 -13  -4  279.67   32.70
  -9  13   4  213.78   38.70
   9  13  -4  225.48   36.40
   9  13  -4  294.47   29.90
   8 -13  -4   34.80   15.50
   8  13  -4   47.20   14.30
  -8  13   4   21.60   22.80
   8  13  -4   90.99   23.30
   7 -13  -4  353.06   32.50
   7  13  -4  270.57   26.30
  -7  13   4  284.17   38.60
   7  13  -4  281.17   33.80
   6 -13  -4   37.40    9.20
   6 -13  -4   19.80   13.00
   6  13  -4   27.20   16.50
   6  13  -4   20.90   11.00
  -6  13   4   22.70   20.40
   5 -13  -4  799.22   31.90
  -5  13   4  794.92   48.70
   5  13  -4  832.42   37.50
   5  13  -4  768.02   43.10
   4 -13  -4  573.94   26.20
  -4 -13   4  603.84   21.60
  -4  13   4  669.83   34.40
  -4  13   4  633.84   42.10
   4  13  -4  600.74   29.50
   3 -13  -4  453.95   21.80
  -3 -13   4  460.35   27.00
  -3  13   4  433.96   25.70
   3  13  -4  459.25   19.20
  -3  13   4  397.56   33.40
   3  13  -4  453.05   23.10
   2 -13  -4  410.36   21.10
  -2 -13   4  469.05   23.50
   2  13  -4  460.25   20.20
   2  13  -4  424.06   21.60
  -2  13   4  449.76   33.70
  -2  13   4  488.75   25.10
   1 -13  -4 1267.37   43.20
   1  13  -4 1195.28   42.70
   1  13  -4 1329.47   42.90
  -1  13   4 1277.57   56.89
  -1  13   4 1234.88   44.50
   0 -13  -4   32.00    7.70
   0  13  -4   18.10    7.50
   0  13   4   46.40    8.20
   0  13  -4   43.80    7.60
   0  13   4   22.60   12.40
   1 -13   4  742.43   27.50
  -1 -13  -4  725.13   29.70
  -1  13  -4  696.43   27.30
   1  13   4  736.53   37.40
  -1  13  -4  684.03   30.30
   1  13   4  700.33   27.40
  -2 -13  -4  334.57   19.30
   2 -13   4  334.07   17.80
  -2  13  -4  315.27   17.00
   2  13   4  343.77   16.50
   2  13   4  325.47   24.60
  -2  13  -4  338.97   21.10
   3 -13   4  617.44   30.90
  -3 -13  -4  663.33   29.10
   3  13   4  655.53   25.10
   3  13   4  682.93   37.30
  -3  13  -4  659.33   31.20
  -3  13  -4  667.43   28.00
  -4 -13  -4  498.25   24.70
   4 -13   4  414.66   27.50
   4  13   4  486.35   32.10
  -4  13  -4  484.25   24.70
  -4  13  -4  417.86   25.40
  -5 -13  -4   12.50    8.30
   5 -13   4   24.50   13.10
  -5  13  -4   21.10   10.00
   5  13   4   73.29   17.70
   6 -13   4  413.86   32.80
  -6  13  -4  432.06   28.10
   6  13   4  363.86   33.80
   7 -13   4  275.27   33.80
  -7  13  -4  289.57   26.50
   7  13   4  269.37   34.80
   9 -14  -4   60.59   19.20
  -9  14   4   77.39   30.70
   9  14  -4  100.69   27.70
   9  14  -4   90.69   19.20
   8 -14  -4  107.19   22.40
   8  14  -4   91.29   17.30
  -8  14   4   84.49   28.20
   8  14  -4   70.69   22.60
   7 -14  -4   11.30   12.70
   7  14  -4    4.40   15.20
   7  14  -4   11.60   10.20
  -7  14   4    8.60   21.80
   6 -14  -4   64.69   15.80
   6 -14  -4   67.69   11.20
   6  14  -4   74.99   14.20
   6  14  -4   59.79   18.20
  -6  14   4   74.09   23.20
   5 -14  -4   19.70    8.00
  -5  14   4   45.90   20.90
   5  14  -4   38.60   10.10
   5  14  -4   25.80   13.90
  -5  14   4   25.40   11.10
   4 -14  -4  122.39   13.70
  -4 -14   4  117.29    9.90
  -4  14   4  141.99   18.60
   4  14  -4  113.09   18.00
   4  14  -4  121.19   14.60
  -4  14   4  127.29   25.10
   3 -14  -4   46.70    9.00
  -3  14   4   44.30   11.10
   3  14  -4   46.90    9.70
   3  14  -4   63.79   12.80
  -3  14   4   68.19   19.40
   2 -14  -4  208.38   15.30
   2  14  -4  213.58   15.20
  -2  14   4  269.77   28.90
   2  14  -4  239.48   14.90
  -2  14   4  226.88   17.20
   1 -14  -4  313.67   18.00
  -1  14   4  274.17   18.50
   1  14  -4  309.07   17.30
   1  14  -4  275.57   17.30
  -1  14   4  317.07   28.90
   0 -14  -4  324.07   18.80
   0  14   4  335.67   18.60
   0  14  -4  383.56   20.50
   0  14  -4  352.16   18.00
   0  14   4  357.86   27.20
  -1 -14  -4    1.60    5.30
  -1  14  -4    6.90    6.50
  -1  14  -4    0.40    4.60
   1  14   4    5.00   10.00
   1  14   4    0.00    4.60
   2 -14   4   52.29    8.20
  -2 -14  -4   50.39    9.90
   2  14   4   46.00    7.80
  -2  14  -4   49.30    8.40
   2  14   4   25.30   12.40
  -2  14  -4   38.30    9.70
   3 -14   4   12.30    8.20
  -3 -14  -4    0.00    5.80
   3  14   4   10.00   11.30
  -3  14  -4    5.50    6.30
   3  14   4   12.00    5.60
  -3  14  -4    1.50    7.00
  -4 -14  -4   27.70    8.90
   4 -14   4   36.70   12.20
  -4  14  -4   24.30    9.40
  -4  14  -4   29.80    9.80
   4  14   4   39.20   14.10
   5 -14   4  135.59   20.60
  -5 -14  -4  133.99   15.50
  -5  14  -4  157.48   18.00
   5  14   4   95.79   20.00
  -6  14  -4   54.19   13.70
   6  14   4   92.49   21.50
   7  14   4   25.90   18.50
  -7  14  -4    8.80   11.60
   9 -15  -4    8.70   17.00
   9  15  -4   32.30   15.20
  -9  15   4   19.60   26.20
   9  15  -4   42.00   23.80
   8 -15  -4   23.40   15.10
  -8  15   4   42.90   24.50
   8  15  -4    7.90   17.60
   8  15  -4   42.60   13.30
   7 -15  -4  341.47   32.90
   7  15  -4  337.17   36.90
  -7  15   4  283.47   39.10
   7  15  -4  336.97   26.20
   6 -15  -4   72.39   11.80
   6 -15  -4   44.20   13.90
   6  15  -4   40.30   16.80
  -6  15   4   56.29   22.80
   6  15  -4   83.79   15.30
   5 -15  -4    6.70    7.10
   5  15  -4   13.60   12.90
  -5  15   4   16.90   19.10
   5  15  -4    0.00    7.40
  -5  15   4   10.40   10.50
  -4 -15   4   17.80    5.80
   4 -15  -4   10.50    7.10
  -4  15   4   36.40   19.50
   4  15  -4   18.70   11.40
   4  15  -4    7.90    7.50
  -4  15   4   23.10   11.90
  -3 -15   4  161.38   12.40
   3 -15  -4  138.09   14.20
   3  15  -4  187.98   17.30
  -3  15   4  187.58   27.20
   3  15  -4  175.78   16.40
  -3  15   4  175.48   18.90
   2 -15  -4   60.89   10.30
   2  15  -4   59.39    9.50
   2  15  -4   44.40    9.10
  -2  15   4   82.09   20.00
   2  15  -4   54.39    9.00
  -2  15   4   31.50   10.00
   1 -15  -4  881.31   35.10
   1  15  -4  948.71   34.90
  -1  15   4  957.60   48.00
  -1  15   4  922.31   36.90
   1  15  -4  930.81   35.10
   0 -15  -4    5.80    5.40
   0  15   4   16.00    6.30
   0  15  -4   21.60    7.00
   0  15   4    9.90   12.00
   0  15  -4    4.60    6.70
  -1 -15  -4   32.00    8.30
   1  15   4   30.20   13.00
   1  15   4   16.80    6.70
  -1  15  -4   34.90    8.50
  -1  15  -4   30.20    7.20
   2 -15   4   73.29    9.40
  -2 -15  -4   52.19   10.00
  -2  15  -4   73.69   10.10
   2  15   4   63.79   15.20
   2  15   4   87.29   10.40
  -2  15  -4   96.39   13.40
  -3 -15  -4   28.50    8.50
   3 -15   4   22.20    9.40
  -3  15  -4    9.50    7.70
   3  15   4   30.20    7.50
  -3  15  -4   26.60    8.20
   3  15   4   27.90   13.20
  -4 -15  -4   60.39   10.70
  -4  15  -4   88.79   13.10
   4  15   4   59.99   16.60
  -4  15  -4   59.19   12.90
  -5 -15  -4  170.98   17.50
   5  15   4  196.38   26.40
  -5  15  -4  213.58   21.60
   6  15   4   30.30   17.00
  -6  15  -4   34.50   12.30
  -7  15  -4    2.10   11.50
   7  15   4    0.00   16.40
   8 -16  -4  626.34   40.90
  -8  16   4  525.05   49.90
   8  16  -4  709.23   37.90
   8  16  -4  526.25   44.00
   7 -16  -4  137.69   22.50
   7 -16  -4  145.29   16.80
   7  16  -4  152.68   25.60
   7  16  -4  157.18   20.10
  -7  16   4  181.48   33.50
   6 -16  -4  467.15   24.80
   6  16  -4  391.96   32.70
   6  16  -4  416.96   26.70
  -6  16   4  427.16   44.00
   5 -16  -4  245.58   17.80
   5  16  -4  229.98   21.30
  -5  16   4  286.07   35.30
   5  16  -4  234.28   25.90
  -5  16   4  197.98   24.10
   4 -16  -4    0.00    6.30
  -4 -16   4    0.00    5.10
  -4  16   4   15.10    9.60
  -4  16   4    0.00   18.10
   4  16  -4    6.20   10.60
   4  16  -4    0.00    6.20
   3 -16  -4  242.48   17.20
  -3 -16   4  271.17   15.60
   3  16  -4  304.07   19.40
  -3  16   4  315.47   33.40
  -3  16   4  228.98   21.80
   3  16  -4  281.27   19.90
   2 -16  -4 1536.45   52.79
  -2  16   4 1493.35   55.89
   2  16  -4 1629.24   50.69
   2  16  -4 1686.43   57.09
  -2  16   4 1559.94   69.79
   2  16  -4 1542.05   53.99
   1 -16  -4  269.27   17.80
  -1  16   4  275.17   19.00
   1  16  -4  244.58   15.90
  -1  16   4  302.37   29.60
   1  16  -4  273.87   17.80
   0 -16  -4  981.00   36.70
   0  16  -4  943.91   35.30
   0  16   4  840.92   45.00
   0  16   4  998.70   36.50
   0  16  -4  915.11   36.50
  -1 -16  -4   54.59   10.00
   1  16   4   49.20   14.60
  -1  16  -4   48.20    9.00
   1  16   4   65.29   10.00
  -1  16  -4   48.10   10.20
  -2 -16  -4   35.20    8.90
   2  16   4   64.89    9.60
   2  16   4   31.00   12.70
  -2  16  -4   65.49   10.10
  -2  16  -4   50.19   11.10
  -3 -16  -4  375.76   21.60
   3  16   4  343.17   27.00
  -3  16  -4  335.97   20.90
  -3  16  -4  313.47   22.40
   3  16   4  341.87   18.60
  -4 -16  -4   70.29   11.70
   4  16   4   85.89   17.50
  -4  16  -4   73.59   13.70
  -4  16  -4   74.29   12.80
  -5 -16  -4  494.35   26.60
  -5  16  -4  463.35   29.00
   5  16   4  419.66   34.20
   6  16   4  428.26   35.80
  -6  16  -4  397.96   28.50
   7  16   4   16.00   18.30
  -7  16  -4   18.70   12.10
   8 -17  -4    7.20   14.70
   8  17  -4   79.39   23.80
  -8  17   4   67.29   28.00
   8  17  -4   21.00   12.20
   7 -17  -4  494.35   36.50
   7 -17  -4  531.35   27.90
   7  17  -4  496.55   31.00
   7  17  -4  445.36   38.00
  -7  17   4  447.06   44.10
   6 -17  -4   22.80    9.50
  -6  17   4   33.20   15.60
   6  17  -4   22.60   15.20
  -6  17   4   21.30   21.40
   6  17  -4   30.10   11.00
   5 -17  -4  254.67   18.80
  -5  17   4  265.57   27.20
   5  17  -4  283.17   26.30
  -5  17   4  251.47   34.10
   5  17  -4  266.47   21.30
   4 -17  -4  248.68   18.40
  -4 -17   4  271.97   15.30
  -4  17   4  267.87   34.20
  -4  17   4  258.87   24.90
   4  17  -4  257.87   19.40
   4  17  -4  297.57   23.30
   3 -17  -4  394.26   22.60
  -3 -17   4  424.96   20.50
  -3  17   4  474.85   37.40
   3  17  -4  418.66   24.40
   3  17  -4  465.85   25.00
  -3  17   4  445.96   27.10
   2 -17  -4  121.59   14.20
  -2  17   4   83.69   21.60
  -2  17   4   93.89   13.90
   2  17  -4  121.69   13.90
   2  17  -4   97.59   11.90
   1 -17  -4  642.64   28.20
   1  17  -4  591.34   27.00
  -1  17   4  608.24   39.30
  -1  17   4  587.54   28.30
   1  17  -4  594.94   27.00
   0 -17  -4   31.80    8.40
   0  17   4   14.90   14.30
   0  17  -4   24.10    8.80
   0  17  -4   22.30    7.10
   0  17   4   28.50    8.10
  -1 -17  -4  790.52   32.90
  -1  17  -4  793.72   34.40
  -1  17  -4  805.02   32.00
   1  17   4  755.12   41.90
   1  17   4  770.22   31.80
  -2 -17  -4  322.77   19.60
   2  17   4  252.87   24.70
  -2  17  -4  290.77   18.10
  -2  17  -4  300.87   21.10
   2  17   4  304.17   17.60
  -3 -17  -4   32.80    8.70
   3  17   4   25.30    7.70
  -3  17  -4   29.20   10.40
   3  17   4   28.40   13.50
  -3  17  -4   40.90    9.40
  -4 -17  -4  205.38   18.70
  -4  17  -4  173.48   20.10
  -4  17  -4  174.18   18.40
   4  17   4  195.08   24.90
   5  17   4   14.50   14.30
  -5  17  -4    1.60    9.10
  -6  17  -4   80.49   16.10
   6  17   4   73.49   20.90
  -7  17  -4  263.07   26.60
   7  17   4  318.87   38.10
   8 -18  -4   44.90   16.70
   8  18  -4   59.39   16.30
   8  18  -4   41.50   21.50
  -8  18   4   52.89   27.00
   7 -18  -4   11.20    9.60
   7 -18  -4   17.40   14.90
   7  18  -4    3.90   10.50
  -7  18   4   22.80   23.20
   7  18  -4   30.00   18.50
   6 -18  -4   42.00   10.90
  -6  18   4   34.90   15.00
  -6  18   4   25.10   20.50
   6  18  -4   42.90   12.50
   6  18  -4   15.40   15.50
   5 -18  -4   37.40   10.10
  -5  18   4   12.80   20.40
  -5  18   4   17.10   12.00
   5  18  -4   41.20   11.00
   5  18  -4   32.20   15.10
   4 -18  -4    6.40    7.00
  -4  18   4    1.30    7.80
   4  18  -4    0.00    6.90
  -4  18   4    0.00   17.80
  -3 -18   4  324.47   18.20
   3 -18  -4  318.67   20.40
  -3  18   4  310.87   23.30
  -3  18   4  343.07   35.70
   3  18  -4  331.17   20.80
   2 -18  -4  168.88   16.30
  -2  18   4  172.08   26.20
   2  18  -4  192.98   17.30
  -2  18   4  160.18   17.40
   1 -18  -4    6.80    6.10
   1  18  -4    2.70    6.00
   1  18  -4    7.20    6.20
  -1  18   4    0.00    6.60
  -1  18   4    5.20   16.10
   0 -18  -4  106.49   13.10
   0  18   4  113.79   13.60
   0  18  -4  139.49   15.40
   0  18  -4  106.09   12.50
   0  18   4  119.69   20.80
  -1 -18  -4  183.38   17.00
  -1  18  -4  217.08   20.20
   1  18   4  233.28   25.10
  -1  18  -4  189.48   16.70
   1  18   4  183.98   16.90
  -2 -18  -4    0.00    6.30
  -2  18  -4    0.00    6.90
   2  18   4    0.00   11.50
   2  18   4    0.00    5.90
  -2  18  -4    0.00    6.10
  -3 -18  -4   52.59   10.90
   3  18   4   40.20    9.10
  -3  18  -4   46.70   11.40
   3  18   4   31.50   14.20
  -3  18  -4   55.09   11.40
  -4 -18  -4   17.80    9.10
   4  18   4   19.50   13.80
  -4  18  -4    0.00    8.00
  -4  18  -4   13.30    9.50
  -5  18  -4    9.70   10.00
   5  18   4    2.40   13.90
   6  18   4  130.79   25.40
  -6  18  -4  106.19   18.50
   7  18   4   85.69   22.90
  -7  18  -4   51.59   15.90
   8 -19  -4    0.00   14.40
  -8  19   4   34.30   27.40
   8  19  -4    4.60   11.60
   7 -19  -4  436.86   27.00
   7 -19  -4  531.65   37.40
   7  19  -4  480.95   31.30
  -7  19   4  409.96   47.70
   6 -19  -4  144.39   17.40
  -6  19   4  146.09   30.40
   6  19  -4  130.49   17.90
  -6  19   4  122.89   21.60
   5 -19  -4    0.00    6.80
  -5  19   4   13.70   20.60
  -5  19   4    0.00   10.00
   5  19  -4    0.10    7.50
   4 -19  -4    4.90    7.70
   4  19  -4    0.00    6.40
  -4  19   4    0.00   16.70
  -4  19   4   12.20   10.90
   3 -19  -4    7.00    7.20
  -3 -19   4    1.00    6.50
   3  19  -4    1.40    7.00
  -3  19   4    0.00   17.80
  -3  19   4    0.10    7.80
   2 -19  -4  162.38   16.70
  -2  19   4  179.78   19.10
  -2  19   4  182.88   26.70
   2  19  -4  185.78   17.10
   1 -19  -4 1227.18   44.70
   1  19  -4 1250.37   43.80
  -1  19   4 1156.28   45.70
   1  19  -4 1163.68   43.70
  -1  19   4 1074.79   56.79
   0 -19  -4    3.70    6.40
   0  19   4    0.00   14.60
   0  19   4    3.70    7.00
   0  19  -4    4.50    7.00
   0  19  -4    0.00    5.60
  -1 -19  -4    2.10    6.90
   1  19   4    2.40    6.80
   1  19   4   10.60   12.80
  -1  19  -4    0.00    5.50
  -1  19  -4    0.00    7.20
  -2 -19  -4   24.10    8.90
   2  19   4   21.50   13.80
   2  19   4   31.40    8.70
  -2  19  -4   33.00    9.60
  -2  19  -4   32.50   10.00
  -3 -19  -4   79.39   12.90
  -3  19  -4   89.39   15.10
   3  19   4   89.09   18.50
   3  19   4   85.49   12.00
  -3  19  -4   90.29   13.80
  -4 -19  -4  150.88   17.00
  -4  19  -4  163.88   19.90
  -4  19  -4  165.18   18.70
   4  19   4  143.29   22.70
  -5  19  -4  189.98   22.20
   5  19   4  197.48   27.70
  -6  19  -4   20.70   12.80
   6  19   4   78.79   21.60
   8 -20  -4  241.78   32.60
  -8  20   4  182.88   38.60
   8  20  -4  213.98   24.00
   7 -20  -4   83.49   15.00
  -7  20   4   49.10   27.40
   7  20  -4   98.99   16.70
   6 -20  -4  370.06   24.30
   6  20  -4  373.06   25.80
  -6  20   4  418.36   44.30
  -6  20   4  338.67   34.10
   5 -20  -4  302.77   21.30
   5  20  -4  262.97   23.60
  -5  20   4  250.27   26.70
  -5  20   4  222.98   34.00
   4 -20  -4   10.90    8.00
  -4  20   4   10.90   10.70
  -4  20   4   13.50   19.60
   4  20  -4    4.80    7.40
   3 -20  -4  107.79   14.10
  -3 -20   4  124.19   13.20
   3  20  -4  126.59   15.30
  -3  20   4  128.69   17.70
  -3  20   4  129.89   25.30
   2 -20  -4  584.34   28.80
  -2 -20   4  603.34   27.40
  -2  20   4  564.74   41.00
  -2  20   4  587.64   31.20
   2  20  -4  570.74   28.20
   1 -20  -4  152.58   16.20
   1  20  -4  178.78   17.50
   1  20  -4  146.09   15.30
  -1  20   4  159.98   25.40
  -1  20   4  147.29   17.30
   0 -20  -4  686.83   31.40
   0  20   4  653.83   41.60
   0  20  -4  698.43   30.80
   0  20   4  657.53   30.70
   0  20  -4  744.23   32.50
  -1 -20  -4   34.00    9.30
  -1  20  -4   10.30    8.40
   1  20   4   28.30   14.90
  -1  20  -4   20.40    8.60
   1  20   4   21.80    9.10
  -2 -20  -4    3.80    6.30
  -2  20  -4    6.40    7.50
  -2  20  -4   11.00    8.70
   2  20   4    4.20    7.20
   2  20   4   10.70   13.50
  -3 -20  -4  428.56   24.70
  -3  20  -4  386.76   25.90
  -3  20  -4  365.16   24.40
   3  20   4  418.56   31.30
   3  20   4  441.06   22.70
  -4 -20  -4  228.38   20.50
  -4  20  -4  224.78   23.20
   4  20   4  191.88   26.00
  -4  20  -4  201.58   20.90
   5  20   4  212.78   28.60
  -5  20  -4  273.97   26.20
   6  20   4  133.89   25.90
  -6  20  -4  108.19   18.80
   7 -21  -4   86.39   15.90
  -7  21   4   69.79   27.90
   7  21  -4  121.89   18.80
   6 -21  -4  118.09   16.60
  -6  21   4  106.89   28.70
  -6  21   4  107.09   21.30
   6  21  -4  101.59   16.70
   5 -21  -4   36.30   10.70
  -5  21   4    0.00   20.60
   5  21  -4   57.49   13.10
  -5  21   4   34.30   14.20
   4 -21  -4  650.53   31.00
  -4  21   4  566.64   34.10
  -4  21   4  524.05   43.00
   4  21  -4  593.74   31.00
  -3 -21   4  226.68   16.40
   3 -21  -4  197.68   18.90
   3  21  -4  175.88   18.30
  -3  21   4  198.38   21.60
  -3  21   4  226.38   31.10
  -2 -21   4    6.60    7.60
   2 -21  -4    5.90    7.10
   2  21  -4   12.20    8.10
  -2  21   4   19.60   18.70
  -2  21   4    3.70    8.90
   1 -21  -4  343.57   22.20
   1  21  -4  364.16   21.90
  -1  21   4  357.06   22.80
   1  21  -4  398.56   23.10
  -1  21   4  379.16   34.60
   0 -21  -4   11.20    7.80
   0  21   4    7.30    7.90
   0  21   4   12.60   15.60
   0  21  -4    0.00    6.70
   0  21  -4   13.10    7.40
  -1 -21  -4  180.88   18.20
  -1  21  -4  179.28   17.20
  -1  21  -4  186.98   19.30
   1  21   4  179.88   17.80
   1  21   4  204.48   24.60
  -2 -21  -4  401.76   24.50
   2  21   4  423.96   23.20
   2  21   4  384.36   31.10
  -2  21  -4  442.06   26.60
  -2  21  -4  431.06   24.90
  -3 -21  -4    3.30    8.00
   3  21   4    0.00   12.30
  -3  21  -4    5.20    9.10
   3  21   4    0.00    7.20
  -3  21  -4    6.20    8.60
  -4 -21  -4  355.16   24.10
   4  21   4  350.66   30.80
  -4  21  -4  350.06   25.80
  -4  21  -4  370.86   26.10
  -5  21  -4  200.98   23.30
   5  21   4  226.18   29.30
   6  21   4   73.69   22.10
  -6  21  -4   44.90   14.90
   7 -22  -4   11.70   10.70
  -7  22   4   40.30   19.30
   7  22  -4    8.20   10.60
   6 -22  -4    2.70    9.80
   6  22  -4   11.00   10.00
  -6  22   4    0.00   21.40
  -6  22   4   16.00   13.40
   5 -22  -4  120.39   16.30
  -5  22   4  117.89   28.40
  -5  22   4  133.09   22.60
   5  22  -4   90.19   15.20
   4 -22  -4    1.90    8.10
  -4  22   4    7.10   10.40
   4  22  -4    6.50    8.60
  -4  22   4   24.10   20.60
   3 -22  -4  123.09   15.10
  -3 -22   4  140.89   14.80
   3  22  -4  115.29   15.40
  -3  22   4  107.89   26.30
  -3  22   4  104.29   16.90
  -2 -22   4   27.50    9.10
   2 -22  -4   27.70    9.90
   2  22  -4   27.10    9.10
  -2  22   4   19.30   10.30
  -2  22   4   16.20   19.30
   1 -22  -4  111.59   15.00
  -1  22   4  141.99   25.40
   1  22  -4  134.69   15.50
  -1  22   4  129.99   16.90
   0 -22  -4  126.19   16.00
   0  22  -4  138.49   15.70
   0  22   4  109.49   22.60
   0  22   4  124.79   16.30
   0  22  -4   87.49   13.70
  -1 -22  -4  231.98   20.60
   1  22   4  227.38   20.40
  -1  22  -4  219.58   21.10
   1  22   4  221.48   26.10
  -1  22  -4  200.18   19.10
  -2 -22  -4   71.39   12.80
   2  22   4   86.89   19.60
  -2  22  -4   92.89   14.30
  -2  22  -4   71.49   13.90
   2  22   4   95.09   13.50
  -3 -22  -4   34.10   10.90
  -3  22  -4   44.60   12.20
   3  22   4   35.30   16.30
  -3  22  -4   37.00   12.00
   3  22   4   49.10   11.70
  -4 -22  -4   13.10    9.80
   4  22   4   29.50   14.90
  -4  22  -4    5.50   10.80
  -4  22  -4    5.30   10.30
   5  22   4   14.30   14.80
  -5  22  -4    0.00   10.20
   6  22   4   91.09   24.40
  -6  22  -4   74.19   16.80
   7 -23  -4  422.56   28.10
   7  23  -4  454.65   31.40
  -7  23   4  293.47   35.20
   6 -23  -4  100.79   16.40
   6  23  -4  126.19   19.10
  -6  23   4  100.49   21.20
   5 -23  -4    8.90    9.00
  -5  23   4   19.50   13.50
   5  23  -4    2.00    8.80
   4 -23  -4    9.70    9.00
  -4  23   4    3.30   21.20
   4  23  -4    3.20    8.50
  -4  23   4   32.20   13.00
   3 -23  -4    2.70    7.90
  -3 -23   4    2.30    7.30
   3  23  -4    1.10    7.90
  -3  23   4    0.00   18.00
  -3  23   4    6.70   10.00
   2 -23  -4   54.19   11.70
  -2 -23   4   54.99   11.30
   2  23  -4   28.90    9.70
  -2  23   4   21.40   10.60
  -2  23   4   23.10   20.10
  -1 -23   4  167.08   17.60
   1 -23  -4  144.29   16.50
  -1  23   4  180.78   28.10
  -1  23   4  173.98   19.20
   1  23  -4  147.09   16.40
   0 -23  -4   19.70    8.80
   0  23   4   28.20   10.30
   0  23  -4   26.40    9.60
   0  23   4    2.00   15.90
   0  23  -4   19.00    9.50
  -1 -23  -4    8.90    8.10
   1  23   4   18.80   15.30
  -1  23  -4   14.80    8.40
  -1  23  -4    2.40    8.10
   1  23   4   16.50    9.20
  -2 -23  -4    0.00    7.10
  -2  23  -4    0.00    7.40
   2  23   4    7.80    8.20
  -2  23  -4    0.00    7.00
   2  23   4    0.50   13.20
  -3 -23  -4    1.90    8.00
   3  23   4   13.50   14.10
  -3  23  -4    0.00    7.70
   3  23   4    0.00    7.40
  -3  23  -4    0.00    8.90
  -4 -23  -4  338.17   23.90
  -4  23  -4  352.46   26.30
   4  23   4  331.37   34.20
  -4  23  -4  314.67   28.10
   5  23   4  249.38   31.50
  -5  23  -4  167.48   21.50
   7 -24  -4    0.00   10.10
  -7  24   4    0.00   14.00
   7  24  -4    9.20   12.00
   6 -24  -4  211.28   22.20
   6  24  -4  187.28   22.00
  -6  24   4  220.28   27.90
   5 -24  -4  186.88   20.50
   5  24  -4  193.88   21.10
  -5  24   4  208.58   26.60
   4 -24  -4    0.90    8.80
   4  24  -4    0.30    8.60
  -4  24   4    0.00    9.50
  -3 -24   4  335.17   21.10
   3 -24  -4  305.27   22.50
   3  24  -4  333.27   22.80
  -3  24   4  313.57   28.80
  -2 -24   4  338.77   21.70
   2 -24  -4  316.77   22.90
  -2  24   4  365.16   37.60
   2  24  -4  326.47   22.50
  -2  24   4  330.77   24.40
   1 -24  -4    5.60    8.20
  -1 -24   4    3.10    8.10
   1  24  -4    1.50    8.20
  -1  24   4    0.00    7.60
  -1  24   4    0.00   17.20
   0 -24  -4  346.27   22.80
   0  24  -4  261.97   20.20
   0  24   4  306.57   32.20
   0  24   4  290.67   21.90
  -1 -24  -4  101.59   15.10
  -1  24  -4  127.39   17.10
  -1  24  -4  138.29   16.40
   1  24   4  116.99   21.70
   1  24   4  101.79   15.60
  -2 -24  -4  113.29   15.70
  -2  24  -4  102.19   15.60
  -2  24  -4  119.39   17.30
   2  24   4  104.09   14.90
   2  24   4   98.49   21.10
  -3 -24  -4  521.25   29.00
   3  24   4  519.05   36.70
  -3  24  -4  449.76   29.20
   3  24   4  485.15   27.00
  -3  24  -4  396.56   28.00
  -4 -24  -4   98.89   15.90
  -4  24  -4  105.49   18.40
   4  24   4  125.09   22.90
  -4  24  -4   93.79   17.10
  -5  24  -4   69.39   16.20
   5  24   4   81.59   22.00
   6 -25  -4  140.79   19.70
  -6  25   4  140.39   25.30
   6  25  -4  161.98   21.10
   5 -25  -4   26.00   11.40
  -5  25   4   23.40   14.40
   5  25  -4   31.50   11.60
   4 -25  -4  715.73   35.50
  -4  25   4  623.34   38.20
   4  25  -4  663.83   34.30
  -3 -25   4   29.40   10.00
   3 -25  -4   30.70   10.40
   3  25  -4   28.90   10.70
  -3  25   4   23.80   12.00
   2 -25  -4  389.86   25.20
  -2 -25   4  391.16   24.30
  -2  25   4  359.76   26.80
   2  25  -4  381.36   24.40
  -1 -25   4  214.68   20.30
   1 -25  -4  217.58   21.00
   1  25  -4  228.08   21.10
  -1  25   4  220.08   22.70
   0 -25  -4   37.60   11.20
   0 -25   4   46.30   12.40
   0  25  -4   77.99   13.80
   0  25   4   54.29   12.30
  -1 -25  -4   69.09   13.50
   1  25   4   77.39   14.30
   1  25   4   64.09   19.60
  -1  25  -4   99.39   15.20
  -1  25  -4   88.79   15.40
  -2 -25  -4  657.23   33.50
   2  25   4  661.73   33.10
   2  25   4  638.04   41.20
  -2  25  -4  666.23   35.00
  -2  25  -4  640.54   34.70
  -3 -25  -4   24.30   10.40
  -3  25  -4   31.20   12.70
   3  25   4   56.99   17.90
  -3  25  -4   38.20   12.30
   3  25   4   16.50   10.30
  -4 -25  -4  335.17   25.20
  -4  25  -4  338.47   29.10
   4  25   4  390.06   33.70
  -4  25  -4  287.47   28.20
   5  25   4  100.89   22.60
  -5  25  -4   71.39   16.40
   6 -26  -4    0.00   10.00
   6  26  -4    7.30   11.20
  -6  26   4    1.50   15.20
   5 -26  -4  115.19   17.30
  -5  26   4   94.39   20.30
   5  26  -4   94.19   16.40
   4 -26  -4    3.90    9.40
  -4  26   4   17.80   12.80
   4  26  -4   17.20    9.60
   3 -26  -4  242.18   22.70
  -3 -26   4  223.78   19.80
   3  26  -4  199.08   20.90
  -3  26   4  207.98   23.60
   2 -26  -4    5.20    8.60
  -2 -26   4    7.10    8.60
   2  26  -4    0.20    7.50
  -2  26   4    6.90   10.40
  -1 -26   4    0.00    8.10
   1 -26  -4    0.00    8.10
   1  26  -4    0.60    7.70
  -1  26   4    1.90    9.30
   0 -26   4   54.89   12.80
   0 -26  -4   44.60   11.70
   0  26  -4   36.90   10.30
   0  26   4   37.30   12.20
  -1 -26  -4  163.58   19.30
   1  26   4  174.68   20.60
  -1  26  -4  149.99   18.60
  -2 -26  -4   96.79   15.20
   2  26   4   82.39   15.40
  -2  26  -4   54.09   13.80
  -2  26  -4   76.69   15.40
  -3 -26  -4   43.60   12.60
   3  26   4   34.10   11.90
  -3  26  -4   26.90   12.30
  -3  26  -4   19.10   12.20
  -4  26  -4   70.89   16.20
  -4  26  -4   51.49   15.90
   4  26   4   78.29   20.20
   6 -27  -4   18.40   12.00
   6  27  -4   35.20   13.10
  -6  27   4   55.99   20.60
   5 -27  -4    0.00   10.30
  -5  27   4    0.00   13.30
   5  27  -4    0.20    7.90
   4 -27  -4   41.80   13.30
  -4  27   4   50.59   15.20
   4  27  -4   22.20    9.90
   3 -27  -4    0.00    8.70
  -3 -27   4    3.40    8.90
   3  27  -4    2.80    7.90
  -3  27   4    0.00    9.80
  -2 -27   4   59.59   12.70
   2 -27  -4   51.19   12.80
   2  27  -4   70.19   13.70
  -2  27   4   68.19   15.50
  -1 -27   4   57.99   13.50
   1 -27  -4   73.89   14.30
   1  27  -4   74.29   13.40
  -1  27   4   53.99   14.30
   0 -27   4    3.10    8.90
   0 -27  -4   20.60    9.70
   0  27  -4    9.50    9.70
   0  27   4    1.80    8.60
   1 -27   4    0.00    8.10
  -1 -27  -4    1.30    8.60
  -1  27  -4    0.00    8.70
   1  27   4    0.00    8.80
  -2 -27  -4   15.90   10.20
  -2  27  -4   29.10   12.90
   2  27   4   20.40   11.50
  -3 -27  -4   16.70   11.10
   3  27   4   21.00   11.20
  -3  27  -4    4.70   11.90
  -3  27  -4    3.10   10.90
  -4  27  -4  144.59   22.30
  -4  27  -4  101.39   19.00
   5 -28  -4  370.76   28.10
   5  28  -4  413.76   28.20
  -5  28   4  340.27   35.00
   4 -28  -4   16.50   11.00
  -4  28   4   17.20   12.60
   4  28  -4    0.00    9.10
   3 -28  -4  357.26   25.40
   3  28  -4  354.66   25.30
  -3  28   4  347.47   32.10
   2 -28  -4  183.18   21.00
  -2 -28   4  154.88   18.60
   2  28  -4  180.58   20.20
  -2  28   4  148.59   21.30
   1 -28  -4    0.00    8.40
  -1 -28   4    3.00    9.10
  -1  28   4    0.10   10.00
   1  28  -4    1.00    8.70
   0 -28   4  206.18   22.10
   0 -28  -4  252.67   23.80
   0  28   4  268.87   25.20
   0  28  -4  222.08   22.50
   1 -28   4  126.79   18.50
  -1 -28  -4  119.69   17.50
   1  28   4  134.89   18.40
  -1  28  -4  117.09   17.70
  -2 -28  -4  158.58   20.00
   2 -28   4  169.18   21.50
  -2  28  -4  164.08   21.80
   2  28   4  161.68   20.90
  -3 -28  -4  282.07   26.00
   3  28   4  306.97   27.10
  -3  28  -4  288.67   28.30
  -4  28  -4   46.00   16.70
   5 -29  -4    5.50   11.00
  -5  29   4   13.80   14.10
   5  29  -4   15.80   10.80
   4 -29  -4  352.26   30.40
  -4  29   4  388.06   35.50
   4  29  -4  384.06   27.30
   3 -29  -4    0.00    8.40
   3  29  -4    0.00    8.90
  -3  29   4    6.20   11.50
   2 -29  -4  268.97   25.20
  -2 -29   4  322.47   26.30
  -2  29   4  276.67   27.90
   2  29  -4  296.67   23.50
  -1 -29   4  239.48   23.30
   1 -29  -4  271.37   25.10
  -1  29   4  239.88   25.30
   1  29  -4  278.47   25.30
   0 -29  -4  101.89   17.00
   0 -29   4  118.49   17.70
   0  29  -4  129.19   18.80
   0  29   4  104.99   18.20
   1 -29   4  139.69   19.50
  -1 -29  -4  177.88   20.90
   1  29   4  137.59   20.20
  -1  29  -4  152.68   19.70
   2 -29   4  273.87   27.30
  -2 -29  -4  282.47   26.30
   2  29   4  312.57   28.40
  -2  29  -4  296.47   28.70
  -3 -29  -4  129.69   19.40
   3 -29   4  126.59   20.20
  -3  29  -4  147.19   21.70
   3  29   4  126.49   18.70
   4 -30  -4    1.70   10.70
   4  30  -4   19.40   10.90
  -4  30   4   25.60   14.30
   3 -30  -4   58.79   14.70
  -3  30   4   57.29   16.10
   3  30  -4   60.09   14.40
  -2 -30   4   57.19   13.90
   2 -30  -4   34.20   12.40
   2  30  -4   47.70   13.20
  -2  30   4   37.10   14.70
  -1 -30   4   14.20   11.30
   1 -30  -4   32.60   12.30
   1  30  -4   52.09   13.60
  -1  30   4   28.50   13.30
   0 -30  -4   75.49   15.40
   0 -30   4   99.59   17.30
   0  30  -4  100.59   17.60
   0  30   4   84.29   16.70
  -1 -30  -4  102.29   17.60
   1 -30   4   76.39   16.50
  -1  30  -4   77.39   16.60
   1  30   4  100.79   18.20
   2 -30   4   26.60   13.00
  -2 -30  -4   27.50   12.40
   2  30   4   31.50   14.00
  -2  30  -4   25.50   14.00
  -3 -30  -4   66.29   16.70
   3 -30   4   68.49   16.60
  -3  30  -4   84.39   18.20
   3  30   4   77.49   17.00
   4 -31  -4    0.00   10.00
  -4  31   4    1.10   13.70
   4  31  -4    0.00    9.40
   3 -31  -4   31.00   12.70
  -3  31   4    5.00   12.80
   3  31  -4    8.90   10.80
   2 -31  -4   33.40   12.70
  -2 -31   4   59.29   14.90
   2  31  -4   43.40   13.80
  -2  31   4   48.30   15.10
  -1 -31   4   32.50   13.20
   1 -31  -4   22.50   11.80
   1  31  -4   31.10   12.70
  -1  31   4   39.90   14.60
   0 -31  -4    3.60   11.00
   0 -31   4   27.20   12.40
   0  31   4   31.30   13.70
   0  31  -4   25.30   12.10
  -1 -31  -4   22.20   11.90
   1 -31   4    0.00   10.50
   1  31   4   26.00   12.90
  -1  31  -4   13.60   10.60
   2 -31   4    0.00   10.60
  -2 -31  -4    0.00   10.40
   2  31   4    0.00   11.70
  -2  31  -4    0.00   12.10
   3 -32  -4  112.59   18.80
   3  32  -4  109.79   18.20
  -3  32   4  151.18   23.80
  -2 -32   4   31.40   12.40
   2 -32  -4    7.10   11.00
   2  32  -4   20.30   11.30
  -2  32   4   24.50   14.40
  -1 -32   4    6.90   12.10
   1 -32  -4   14.40   10.50
   1  32  -4    0.00    9.60
  -1  32   4    0.00   11.10
   0 -32   4  163.28   21.90
   0 -32  -4  162.88   22.00
   0  32   4  157.68   22.50
   0  32  -4  164.88   21.70
  -1 -32  -4  137.09   19.80
   1 -32   4  141.59   20.90
  -1  32  -4  131.29   20.70
   1  32   4  131.59   21.30
   1 -33  -4  293.57   28.20
  -1 -33   4  325.67   28.90
   1  33  -4  298.47   29.00
  -1  33   4  305.57   31.60
   0 -33  -4  144.09   20.80
   0  33   4  159.88   22.70
   0  33  -4  186.88   23.60
  10   0  -5    0.00   14.30
   9   0  -5   26.80   15.20
  -9   0   5   73.69   24.00
  -8   0   5   17.50   19.00
   8   0  -5    0.00    8.90
   7   0  -5    8.30   11.20
  -7   0   5    0.00   16.20
  -6   0   5   21.00   17.60
   6   0  -5    0.00    9.30
  -5   0   5   86.29   18.90
   4   0  -5    0.00    3.90
   4   0  -5    0.00    5.10
  -4   0   5    6.70   13.80
   3   0  -5    0.00    6.20
   3   0  -5    0.00    3.80
  -3   0   5    3.00   13.10
  -2   0   5   12.30   12.00
   2   0  -5    2.60    4.60
   2   0  -5    5.10    6.90
   1   0  -5    0.00    5.70
  -1   0   5   35.60   11.00
   1   0  -5    0.00    4.60
   0   0  -5    1.10    5.30
   0   0   5    0.00    8.00
   0   0  -5    0.00    4.50
  -1   0  -5    0.00    2.50
   1   0   5    0.00    7.40
  -1   0  -5    0.00    5.50
  -1   0  -5    0.00    2.90
  -2   0  -5    0.00    5.80
   2   0   5    9.80    8.20
  -3   0  -5    0.00    5.90
   3   0   5    3.30    8.60
  -4   0  -5    0.00    6.40
   4   0   5    0.00    9.70
  -5   0  -5   17.60    8.70
   6   0   5   77.39   18.50
  -6   0  -5   18.70   10.00
   7   0   5   34.70   18.20
   8   0   5   26.10   19.60
  10  -1  -5   69.19   20.60
  10   1  -5   41.40   18.30
   9  -1  -5  216.58   27.10
  -9  -1   5  229.08   34.30
  -9   1   5  235.48   37.30
   9   1  -5  210.78   26.60
   8  -1  -5   56.29   16.20
  -8  -1   5   66.49   22.10
  -8   1   5   46.90   22.40
   8   1  -5   55.49   15.70
   7  -1  -5   20.50   13.00
  -7  -1   5   17.70   18.20
  -7   1   5   41.80   20.80
   7   1  -5   26.70   12.60
  -6  -1   5  530.25   40.60
   6  -1  -5  560.84   33.50
  -6   1   5  512.85   40.70
   6   1  -5  567.64   32.80
  -5  -1   5  608.64   39.90
   5  -1  -5  572.54   32.20
   5  -1  -5  609.94   21.10
   5   1  -5  596.14   32.70
   5   1  -5  624.54   20.10
  -5   1   5  646.44   41.10
   4  -1  -5  167.78   17.40
   4  -1  -5  151.78   10.30
  -4  -1   5  175.28   23.90
   4   1  -5  162.48   16.50
   4   1  -5  169.98   10.10
  -4   1   5  190.48   24.30
  -3  -1   5  133.19   19.50
   3  -1  -5  134.89   10.70
   3  -1  -5  113.69   14.50
   3   1  -5  130.19   10.10
  -3   1   5  140.39   21.20
   3   1  -5  129.89   14.90
   2  -1  -5  102.89   10.00
  -2  -1   5  111.99   17.10
   2  -1  -5   86.79   11.80
   2   1  -5   95.89   11.70
   2   1  -5   97.99    9.70
  -2   1   5  121.09   17.70
   1  -1  -5  716.73   27.30
  -1  -1   5  699.53   34.90
   1  -1  -5  746.13   28.80
   1   1  -5  754.12   27.70
  -1   1   5  744.63   36.60
   1   1  -5  692.63   27.60
   0  -1   5 1267.07   49.60
   0  -1  -5 1197.18   41.40
   0  -1  -5 1246.98   39.50
   0   1  -5 1232.78   41.90
   0   1  -5 1197.08   38.50
   0   1   5 1330.77   50.99
   1  -1   5    0.00    3.50
  -1  -1  -5    3.60    2.90
  -1  -1  -5    3.70    3.00
  -1  -1  -5    0.00    5.70
   1  -1   5   11.80    7.80
  -1   1  -5    4.20    6.20
  -1   1  -5    1.50    2.70
   1   1   5    5.40    7.60
   2  -1   5  352.56   21.80
  -2  -1  -5  309.47   19.40
  -2   1  -5  323.37   19.60
   2   1   5  327.97   22.00
   3  -1   5   26.00   10.30
  -3  -1  -5   20.70    8.10
   3   1   5   14.40   10.20
  -3   1  -5   21.00    8.70
  -4  -1  -5  129.59   15.50
   4  -1   5  119.09   18.70
  -4   1  -5   71.09   12.40
   4   1   5   69.69   15.80
  -5  -1  -5  848.92   36.60
   5  -1   5  731.53   42.70
   5   1   5  734.13   43.30
  -5   1  -5  775.02   35.50
   6  -1   5  388.56   32.40
  -6  -1  -5  350.96   24.60
   6   1   5  324.27   34.90
  -6   1  -5  341.17   24.50
   7  -1   5  183.18   27.90
   7   1   5   67.99   21.60
   8  -1   5  101.29   25.60
   8   1   5  102.89   26.80
   9  -2  -5   19.20   14.70
  -9  -2   5   70.89   24.60
  -9   2   5   63.99   25.20
   9   2  -5   58.39   17.40
  -8  -2   5   23.80   19.20
   8  -2  -5   18.50   13.60
  -8   2   5   34.20   22.00
   8   2  -5   16.00   11.90
   7  -2  -5  139.19   20.20
  -7  -2   5  119.89   24.10
   7   2  -5   90.99   17.50
  -7   2   5   87.99   25.20
   6  -2  -5   26.60   14.10
  -6  -2   5   72.69   21.40
   6   2  -5   16.90   11.60
  -6   2   5   91.89   21.40
  -5  -2   5 1968.40   86.89
   5  -2  -5 2129.29   58.29
   5  -2  -5 2021.00   73.59
   5   2  -5 2132.09   55.69
   5   2  -5 2040.20   72.69
  -5   2   5 2113.29   88.89
   4  -2  -5  389.46   16.50
  -4  -2   5  407.26   31.40
   4  -2  -5  404.76   24.50
   4   2  -5  401.26   15.50
  -4   2   5  367.36   31.30
   4   2  -5  391.56   23.20
   3  -2  -5   48.60   10.70
   3  -2  -5   61.59    7.80
  -3  -2   5   76.19   16.60
   3   2  -5   50.69   10.50
   3   2  -5   74.69    7.70
  -3   2   5   58.49   16.70
  -2  -2   5   15.30   12.10
   2  -2  -5    9.70    7.60
   2  -2  -5   13.80    5.50
   2   2  -5   24.50    8.00
   2   2  -5   10.60    5.20
  -2   2   5   33.80   13.30
  -1  -2   5  351.36   24.40
   1  -2  -5  340.47   18.40
   1  -2  -5  350.96   17.90
   1   2  -5  367.46   17.90
  -1   2   5  372.46   25.90
   1   2  -5  364.16   17.80
   0  -2  -5  635.24   26.10
   0  -2   5  661.73   30.30
   0  -2  -5  672.13   24.40
   0   2   5  630.54   32.00
   0   2  -5  603.24   22.50
   0   2  -5  637.24   26.40
  -1  -2  -5 3618.94   95.69
  -1  -2  -5 3642.74   96.79
   1  -2   5 3524.05  121.79
  -1  -2  -5 3449.16  100.49
   1   2   5 3497.45  123.09
  -1   2  -5 3492.75  100.69
  -1   2  -5 3442.86   95.59
   2  -2   5    0.80    7.20
  -2  -2  -5    1.60    5.70
  -2   2  -5    0.00    5.50
   2   2   5    5.50    8.10
   3  -2   5  579.44   31.60
  -3  -2  -5  647.34   28.80
   3   2   5  563.84   32.20
  -3   2  -5  582.14   28.60
  -4  -2  -5  140.69   15.80
   4  -2   5  156.78   20.20
  -4   2  -5  144.79   16.40
   4   2   5  142.59   20.40
  -5  -2  -5   25.10    9.20
  -5   2  -5    6.60    8.00
   6  -2   5  604.84   40.50
  -6  -2  -5  578.94   31.40
   6   2   5  562.64   40.30
  -6   2  -5  642.24   32.90
   7  -2   5  536.25   41.00
   7   2   5  509.95   40.80
   8  -2   5  155.68   30.50
   8   2   5  148.99   29.40
   9  -3  -5  233.38   28.20
  -9  -3   5  170.98   33.20
  -9   3   5  236.98   37.70
   9   3  -5  200.98   26.10
   8  -3  -5  113.59   20.00
  -8  -3   5  118.49   27.80
  -8   3   5   72.29   24.60
   8   3  -5  112.59   19.60
   7  -3  -5   40.00   13.40
  -7  -3   5   46.30   20.80
  -7   3   5   42.60   20.60
   7   3  -5   23.90   12.70
  -6  -3   5  450.15   37.60
   6  -3  -5  443.76   30.00
   6   3  -5  446.26   29.20
  -6   3   5  427.96   36.80
   5  -3  -5   13.00   12.30
   5  -3  -5   37.80    6.10
  -5  -3   5   29.90   16.50
   5   3  -5   26.20   11.30
  -5   3   5  102.19   21.10
   4  -3  -5  280.87   20.80
  -4  -3   5  299.77   29.10
   4  -3  -5  253.87   13.50
   4   3  -5  276.07   12.30
  -4   3   5  282.97   29.70
   4   3  -5  276.37   20.00
   3  -3  -5  470.15   19.40
   3  -3  -5  471.25   25.00
  -3  -3   5  431.66   31.20
  -3   3   5  508.05   34.10
   3   3  -5  489.85   25.50
   3   3  -5  477.05   18.50
   2  -3  -5    5.50    6.90
  -2  -3   5    0.00   10.80
   2  -3  -5    6.20    5.00
  -2   3   5    0.00   11.70
   2   3  -5    3.00    4.80
   2   3  -5    6.20    6.70
   1  -3  -5  858.11   31.60
  -1  -3   5  896.11   39.40
   1  -3  -5  952.20   33.40
   1   3  -5  863.21   31.30
   1   3  -5  912.61   32.10
  -1   3   5  827.22   41.30
   0  -3   5 1239.08   49.90
   0  -3  -5 1348.77   43.40
   0  -3  -5 1260.77   40.90
   0   3   5 1294.17   52.69
   0   3  -5 1318.07   43.10
   0   3  -5 1281.17   39.70
   1  -3   5    0.00    7.00
  -1  -3  -5    0.00    3.50
  -1  -3  -5    4.10    5.90
  -1   3  -5    0.00    5.50
   1   3   5    0.00    8.00
  -1   3  -5    0.20    2.70
   2  -3   5  125.39   14.50
  -2  -3  -5  109.19   12.40
  -2   3  -5  100.79   12.50
   2   3   5   90.39   13.80
  -3  -3  -5   28.50    8.90
   3  -3   5   20.70    9.70
  -3   3  -5   32.90    9.10
   3   3   5   24.30   10.70
   4  -3   5  108.59   17.50
  -4  -3  -5  128.29   15.20
  -4   3  -5  130.79   15.50
   4   3   5  136.69   19.90
  -5  -3  -5  510.15   27.00
   5  -3   5  499.25   33.70
  -5   3  -5  456.55   26.70
   5   3   5  427.16   32.70
  -6  -3  -5  330.57   24.30
   6  -3   5  362.66   31.10
   6   3   5  378.96   32.80
  -6   3  -5  308.77   23.60
   7  -3   5   67.89   21.10
   7   3   5  165.08   27.20
   8  -3   5   97.29   26.20
   8   3   5  107.29   26.70
   9  -4  -5  131.19   22.90
  -9   4   5  111.99   26.90
   9   4  -5  107.69   20.80
   8  -4  -5   96.29   19.40
  -8  -4   5   97.89   25.70
  -8   4   5   69.49   25.00
   8   4  -5   70.49   16.20
  -7  -4   5   53.39   20.80
   7  -4  -5   76.69   16.90
   7   4  -5   65.59   15.30
  -7   4   5   51.09   21.70
   6  -4  -5  127.29   20.50
  -6  -4   5  195.18   28.50
   6   4  -5  111.99   17.70
  -6   4   5  163.48   26.90
  -5  -4   5   25.30   15.20
   5  -4  -5    0.00   10.00
   5  -4  -5   16.20    5.30
   5   4  -5   13.70    9.80
  -5   4   5   20.90   16.80
   4  -4  -5   11.60    5.00
  -4  -4   5    8.70   13.50
   4  -4  -5    2.40    8.40
   4   4  -5   14.40    8.50
   4   4  -5    5.00    3.90
  -4   4   5    6.60   14.10
   3  -4  -5  214.38   12.90
   3  -4  -5  217.78   17.10
  -3  -4   5  250.87   24.00
  -3   4   5  221.98   25.30
   3   4  -5  204.18   11.80
   3   4  -5  211.28   16.70
   2  -4  -5    1.50    6.20
  -2  -4   5    0.00   10.40
   2  -4  -5    3.50    5.00
  -2   4   5    0.00   12.30
   2   4  -5    0.80    4.50
   2   4  -5   10.10    6.50
   1  -4  -5  272.07   16.30
  -1  -4   5  261.47   20.30
   1  -4  -5  243.58   15.20
  -1   4   5  235.88   22.20
   1   4  -5  255.87   14.60
   1   4  -5  234.98   14.60
   0  -4   5  196.28   16.60
   0  -4  -5  215.78   14.70
   0  -4  -5  186.98   12.40
   0   4   5  195.38   18.50
   0   4  -5  200.38   14.50
   0   4  -5  216.28   11.60
  -1  -4  -5    0.00    5.00
   1  -4   5    0.00    6.40
  -1   4  -5    0.00    2.50
  -1   4  -5    4.10    5.80
   1   4   5    7.00    8.30
   2  -4   5  182.68   15.00
  -2  -4  -5  154.28   14.80
  -2   4  -5  148.49    7.70
  -2   4  -5  164.28   15.40
   2   4   5  176.28   18.90
  -3  -4  -5   11.90    7.40
   3  -4   5   15.20    9.40
   3   4   5    7.70    9.90
  -3   4  -5    9.90    7.10
  -4  -4  -5    4.50    7.40
   4  -4   5    8.70   10.80
  -4   4  -5    7.30    6.70
   4   4   5    1.70   10.50
   5  -4   5   84.29   18.20
  -5  -4  -5   42.70   10.90
   5   4   5   88.79   17.50
  -5   4  -5   48.20   11.70
  -6  -4  -5   50.89   12.10
   6  -4   5   73.09   19.10
   6   4   5   89.59   20.00
  -6   4  -5   27.40   11.40
   7  -4   5   21.30   16.70
   7   4   5   23.90   17.40
   8  -4   5   61.29   23.10
   8   4   5   68.59   22.70
   9  -5  -5  272.87   31.00
   9   5  -5  239.48   27.50
  -9   5   5  201.18   34.10
   8  -5  -5   89.19   19.10
  -8  -5   5   76.79   22.60
   8   5  -5   69.69   17.00
  -8   5   5   85.09   25.60
   7  -5  -5   35.70   14.10
  -7  -5   5   43.20   20.10
  -7   5   5   65.69   22.90
   7   5  -5   30.60   12.50
  -6  -5   5  493.75   38.60
   6  -5  -5  503.45   32.70
   6   5  -5  561.64   31.90
  -6   5   5  467.55   39.60
   5  -5  -5  131.39   11.00
   5  -5  -5  125.79   18.60
  -5  -5   5  185.08   25.20
  -5   5   5  167.88   25.60
   5   5  -5  137.99   17.80
   4  -5  -5  310.57   15.20
   4  -5  -5  257.57   22.90
  -4  -5   5  319.07   27.40
  -4   5   5  322.77   30.60
   4   5  -5  272.57   21.10
   4   5  -5  288.87   12.50
   3  -5  -5   43.50   10.00
   3  -5  -5   41.70    7.10
  -3  -5   5   46.10   14.60
   3   5  -5   26.70    8.40
  -3   5   5   56.29   16.50
   3   5  -5   39.10    6.20
   2  -5  -5    6.10    7.00
   2  -5  -5    4.10    5.00
  -2  -5   5    9.00   10.70
  -2   5   5    0.00   11.70
   2   5  -5    5.50    4.90
   2   5  -5    5.00    6.20
  -1  -5   5  220.28   18.60
   1  -5  -5  204.38   14.00
   1  -5  -5  198.58   14.20
  -1   5   5  223.18   21.90
   1   5  -5  174.38   13.40
   1   5  -5  196.78   13.20
   0  -5  -5 2564.94   75.39
   0  -5   5 2518.25   89.49
   0   5   5 2671.13   75.29
   0   5  -5 2462.65   73.09
   0   5   5 2568.64   93.69
   0   5  -5 2558.14   75.29
   1  -5   5    0.00    6.50
  -1  -5  -5    0.70    5.50
   1   5   5    4.70    4.30
   1   5   5    0.10    8.20
  -1   5  -5    1.80    2.90
  -1   5  -5    0.00    4.70
   2  -5   5  301.77   19.60
  -2  -5  -5  318.57   18.80
   2   5   5  288.37   11.60
  -2   5  -5  283.17   11.90
  -2   5  -5  287.27   18.90
   2   5   5  336.77   23.20
  -3  -5  -5   25.80    8.50
   3  -5   5    2.20    8.40
   3   5   5   27.30   11.10
  -3   5  -5   20.30    5.10
  -3   5  -5   18.60    8.50
  -4  -5  -5   62.09   11.60
   4  -5   5   71.79   14.50
   4   5   5   69.79   16.20
  -4   5  -5   49.00   11.00
   5  -5   5  160.28   22.60
  -5  -5  -5  159.48   17.60
   5   5   5  180.68   24.70
  -5   5  -5  164.38   18.50
  -6  -5  -5  208.38   20.80
   6  -5   5  294.47   31.60
   6   5   5  253.37   31.20
  -6   5  -5  245.88   22.90
   7  -5   5  167.78   27.10
   7   5   5  124.49   25.00
  -7   5  -5  144.89   19.30
   8  -5   5  125.29   26.90
   9  -6  -5  131.09   22.90
   9   6  -5   95.29   18.30
  -9   6   5  156.28   32.30
  -8  -6   5   71.39   23.30
   8  -6  -5   67.59   18.10
  -8   6   5  111.99   26.30
   8   6  -5   68.59   15.80
  -7  -6   5  123.99   25.80
   7  -6  -5  136.69   21.00
   7   6  -5  120.59   18.60
  -7   6   5  118.29   26.80
  -6  -6   5   31.20   17.00
   6  -6  -5    0.00    4.80
   6  -6  -5    3.70   10.40
  -6   6   5   27.10   18.10
   6   6  -5    0.00    8.90
   5  -6  -5 1783.62   52.19
  -5  -6   5 1668.83   76.09
   5  -6  -5 1749.92   65.69
   5   6  -5 1716.73   63.39
  -5   6   5 1714.93   78.99
   4  -6  -5 2142.79   62.29
   4  -6  -5 2076.79   73.59
  -4  -6   5 2129.09   85.49
   4   6  -5 2171.48   72.69
  -4   6   5 2136.29   89.19
   4   6  -5 2148.69   57.99
   3  -6  -5   64.69   11.90
   3  -6  -5   63.19    8.60
  -3  -6   5   82.29   15.70
   3   6  -5   55.99    7.10
   3   6  -5   69.29   11.50
  -3   6   5   49.40   16.80
   2  -6  -5  742.03   28.00
  -2  -6   5  740.93   36.60
   2  -6  -5  758.62   31.70
   2   6  -5  700.63   26.40
  -2   6   5  780.72   41.40
   2   6  -5  768.42   30.50
   1  -6  -5   62.89    9.40
  -1  -6   5   81.19   12.40
  -1   6   5   82.09   10.70
   1   6  -5   75.09    9.20
  -1   6   5   71.89   15.20
   1   6  -5   63.09    8.90
   0  -6   5  116.39   12.90
   0  -6  -5  101.19   11.60
   0   6   5  114.79   16.00
   0   6  -5  100.29   11.30
   0   6  -5  107.99    9.10
   0   6   5   87.09    9.70
   1  -6   5  912.21   37.60
  -1  -6  -5  894.21   34.30
   1   6   5  897.51   41.70
  -1   6  -5  922.91   35.10
  -1   6  -5  953.20   29.10
   1   6   5  915.31   30.00
   2  -6   5  543.35   26.70
  -2  -6  -5  499.55   24.40
   2   6   5  524.25   18.10
  -2   6  -5  479.95   24.80
   2   6   5  566.74   30.40
  -2   6  -5  492.85   18.10
  -3  -6  -5  573.74   27.00
   3  -6   5  532.95   29.50
  -3   6  -5  570.74   21.00
   3   6   5  532.45   17.90
  -3   6  -5  560.14   27.90
   3   6   5  530.05   32.20
  -4  -6  -5  695.83   31.30
   4  -6   5  695.73   37.40
  -4   6  -5  681.53   32.70
   4   6   5  645.94   38.60
   5  -6   5   38.20   13.50
  -5  -6  -5    9.90    8.00
  -5   6  -5   12.50    9.10
   5   6   5   14.00   12.80
  -6  -6  -5  447.66   26.70
   6  -6   5  402.36   32.70
   6   6   5  408.46   34.90
  -6   6  -5  438.66   27.70
   7  -6   5  333.87   37.00
  -7   6  -5  348.37   28.70
   7   6   5  361.96   34.40
   9  -7  -5  226.98   29.00
  -9   7   5  201.08   36.70
   9   7  -5  207.68   25.00
   9   7  -5  230.98   36.20
  -8  -7   5  156.98   27.10
   8  -7  -5  187.98   25.30
  -8   7   5  129.09   30.90
   8   7  -5  174.88   22.90
  -7  -7   5  164.18   28.40
   7  -7  -5  154.18   21.90
   7   7  -5  163.28   20.70
  -7   7   5  171.18   30.10
   6  -7  -5  210.28   14.20
  -6  -7   5  247.88   31.00
   6  -7  -5  216.98   23.70
  -6   7   5  229.88   32.60
   6   7  -5  275.97   25.30
   5  -7  -5    9.60    5.60
  -5  -7   5   24.60   15.90
   5  -7  -5    5.70    9.90
   5   7  -5    8.90    9.20
  -5   7   5   31.40   18.60
   4  -7  -5   62.19   13.30
  -4  -7   5   72.79   17.20
   4  -7  -5   68.89    8.80
   4   7  -5   70.69   12.30
   4   7  -5   64.69    6.50
  -4   7   5  109.49   22.10
   3  -7  -5 1252.27   47.30
   3  -7  -5 1229.08   40.00
  -3  -7   5 1195.18   52.89
   3   7  -5 1212.88   37.20
   3   7  -5 1168.98   44.70
  -3   7   5 1249.18   58.29
  -2  -7   5    4.00   10.80
   2  -7  -5    4.30    5.20
   2   7  -5   14.20    5.50
   2   7  -5    2.30    5.80
  -2   7   5    0.00   13.10
  -1  -7   5  879.71   36.80
   1  -7  -5  783.42   31.00
   1   7  -5  850.21   31.00
  -1   7   5  861.61   33.00
   1   7  -5  816.02   30.70
  -1   7   5  910.81   43.20
   0  -7  -5   28.90    7.40
   0  -7   5   30.30    9.00
   0   7   5   42.10    7.40
   0   7  -5   29.20    7.50
   0   7   5   45.30   11.90
   0   7  -5   38.00    6.20
  -1  -7  -5   72.79   10.90
   1  -7   5   68.39   10.30
  -1   7  -5   86.39   11.70
  -1   7  -5   94.39    7.50
   1   7   5   81.79    8.00
   1   7   5   68.19   13.40
   2  -7   5  748.73   34.30
  -2  -7  -5  805.42   32.40
   2   7   5  776.02   25.40
  -2   7  -5  794.62   33.20
  -2   7  -5  764.22   25.80
   2   7   5  833.62   38.90
  -3  -7  -5   39.60    9.30
   3  -7   5   47.90   10.90
   3   7   5   46.70   13.30
  -3   7  -5   49.90    7.10
  -3   7  -5   35.50   10.10
   3   7   5   42.10    5.20
   4  -7   5  478.05   30.70
  -4  -7  -5  540.65   27.20
  -4   7  -5  509.55   27.80
   4   7   5  533.95   33.90
   5  -7   5  395.36   30.20
  -5  -7  -5  445.96   25.40
   5   7   5  411.96   32.60
  -5   7  -5  407.36   26.10
   6  -7   5  132.29   23.40
   6   7   5  200.88   27.90
  -6   7  -5  185.08   20.70
   7  -7   5    6.90   15.40
   7   7   5   59.19   19.70
  -7   7  -5    0.00   10.80
   9  -8  -5  129.19   22.90
   9   8  -5  130.69   29.40
   9   8  -5   97.59   19.10
  -9   8   5  117.19   32.30
   8  -8  -5   12.20   11.70
   8   8  -5   35.40   13.00
  -8   8   5   11.70   21.30
   7  -8  -5    9.30   11.40
  -7  -8   5   11.10   16.40
   7   8  -5   17.90   10.90
  -7   8   5   20.90   20.40
   6  -8  -5  209.98   23.60
   6  -8  -5  215.68   14.60
  -6  -8   5  198.48   28.30
  -6   8   5  239.68   32.50
   6   8  -5  200.88   21.50
   5  -8  -5    0.80    5.10
  -5  -8   5   15.20   14.60
   5  -8  -5    0.60    9.60
  -5   8   5    0.00   16.60
   5   8  -5    0.00    7.70
   4  -8  -5  869.41   31.00
  -4  -8   5  871.81   45.10
   4  -8  -5  768.12   37.60
   4   8  -5  851.41   26.40
  -4   8   5  935.11   50.49
   4   8  -5  828.12   37.10
  -3  -8   5  382.36   26.50
   3  -8  -5  321.57   16.90
   3  -8  -5  325.77   22.00
   3   8  -5  320.47   15.20
  -3   8   5  361.86   31.30
   3   8  -5  376.86   21.80
   2  -8  -5  336.07   17.90
  -2  -8   5  345.27   24.40
   2   8  -5  356.06   17.30
  -2   8   5  353.06   29.90
  -2   8   5  392.96   22.40
   2   8  -5  341.17   19.40
   1  -8  -5  157.48   13.90
  -1  -8   5  160.88   15.10
  -1   8   5  148.19   13.80
   1   8  -5  154.38   11.70
  -1   8   5  160.88   20.10
   1   8  -5  136.49   12.60
   0  -8   5    2.10    7.60
   0  -8  -5    4.70    5.80
   0   8  -5    6.80    5.80
   0   8   5    0.00   10.00
   0   8  -5   12.10    4.80
   0   8   5   13.20    5.80
  -1  -8  -5   40.20    8.30
   1  -8   5   30.70    8.10
  -1   8  -5   34.90    5.50
  -1   8  -5   34.70    8.70
   1   8   5   38.60    6.50
   1   8   5   32.70   11.60
   2  -8   5  110.39   12.90
  -2  -8  -5  127.19   13.70
  -2   8  -5   96.89    8.40
  -2   8  -5   91.59   13.10
   2   8   5  114.49    8.40
   2   8   5   93.39   15.20
   3  -8   5    2.80    8.20
  -3  -8  -5    2.10    6.50
  -3   8  -5    0.00    6.60
   3   8   5    9.40    3.80
  -3   8  -5    0.00    4.90
   3   8   5    4.10    9.90
  -4  -8  -5   10.60    8.20
   4  -8   5   12.80   10.70
  -4   8  -5   15.20    9.10
   4   8   5   44.90   14.40
   5  -8   5  105.69   18.40
  -5  -8  -5   90.89   14.00
  -5   8  -5   90.49   15.00
   5   8   5  118.99   20.90
   6  -8   5   35.60   15.50
   6   8   5   11.80   14.90
  -6   8  -5    7.80    9.20
   7  -8   5   67.29   20.00
  -7   8  -5    7.60   11.90
   7   8   5    9.40   16.40
   9  -9  -5  129.89   22.30
   9   9  -5  122.79   21.10
   9   9  -5  123.89   29.00
  -9   9   5   80.09   28.60
   8  -9  -5   39.50   15.50
   8   9  -5   47.70   14.10
  -8   9   5   43.00   26.80
  -7  -9   5   44.10   17.10
   7  -9  -5    8.40   11.60
   7   9  -5   30.20   12.60
  -7   9   5   47.90   22.80
  -6  -9   5  415.26   34.80
   6  -9  -5  377.36   29.00
   6  -9  -5  372.36   19.40
  -6   9   5  386.86   40.00
   6   9  -5  388.26   25.90
  -5  -9   5   14.70   14.10
   5  -9  -5    3.60    9.60
   5  -9  -5    3.60    5.80
   5   9  -5    0.30    8.00
  -5   9   5   13.30   18.20
  -4  -9   5  586.04   36.50
   4  -9  -5  532.35   30.20
   4  -9  -5  553.74   24.00
   4   9  -5  538.85   19.60
   4   9  -5  572.84   29.60
  -4   9   5  632.04   42.10
  -3  -9   5  159.18   19.30
   3  -9  -5  176.78   14.30
  -3   9   5  159.28   24.00
   3   9  -5  155.18   15.50
   3   9  -5  148.39   11.10
   2  -9  -5  203.28   14.10
  -2  -9   5  209.68   19.70
  -2   9   5  197.38   17.70
   2   9  -5  225.98   13.60
  -2   9   5  220.48   25.50
   2   9  -5  205.88   15.20
   1  -9  -5  195.48   14.30
  -1  -9   5  206.48   18.00
   1   9  -5  211.48   13.60
  -1   9   5  229.58   16.00
   1   9  -5  199.18   14.30
  -1   9   5  188.48   22.00
   0  -9  -5  675.43   28.70
   0  -9   5  732.73   31.20
   0   9   5  691.23   36.90
   0   9   5  795.92   28.30
   0   9  -5  704.93   29.30
   0   9  -5  731.13   26.40
   1  -9   5    0.90    6.30
  -1  -9  -5   16.50    6.70
   1   9   5    9.40    5.00
  -1   9  -5    0.00    5.50
   1   9   5    7.10   10.20
  -1   9  -5    5.20    4.10
   2  -9   5  270.87   17.80
  -2  -9  -5  277.17   18.40
   2   9   5  284.47   13.20
  -2   9  -5  237.18   18.40
  -2   9  -5  262.27   13.40
   2   9   5  298.87   23.00
   3  -9   5   80.59   13.20
  -3  -9  -5   72.69   11.50
  -3   9  -5   60.99   11.50
   3   9   5   68.49   14.80
   3   9   5   72.09    7.20
  -4  -9  -5    2.20    7.50
  -4   9  -5    0.00    7.10
   4   9   5    0.00   10.80
  -5  -9  -5  140.99   16.20
   5  -9   5  147.79   21.50
  -5   9  -5  126.99   17.40
   5   9   5  153.18   23.40
   6  -9   5  112.39   21.00
   6   9   5   58.29   19.20
  -6   9  -5  104.29   15.90
   7  -9   5  168.58   27.80
   7   9   5  133.09   26.40
  -7   9  -5  154.38   20.10
   9 -10  -5   66.59   18.90
  -9  10   5   82.69   29.50
   9  10  -5   75.09   18.20
   9  10  -5   74.59   25.40
   8 -10  -5   92.99   21.20
   8  10  -5  108.59   26.90
  -8  10   5  108.29   29.10
   8  10  -5  123.09   19.60
   7 -10  -5  398.66   31.00
  -7  10   5  320.57   40.70
   7  10  -5  381.16   27.70
   6 -10  -5   24.90   12.50
  -6 -10   5   11.70   15.50
   6 -10  -5    4.90    6.30
   6  10  -5    0.00    9.00
  -6  10   5    5.50   17.50
  -5 -10   5 1038.10   53.59
   5 -10  -5 1080.59   48.20
   5 -10  -5 1034.50   36.90
  -5  10   5 1044.20   58.09
   5  10  -5 1030.60   44.40
   4 -10  -5 2989.70   98.79
   4 -10  -5 2986.90   86.89
  -4 -10   5 3052.49  113.69
  -4  10   5 3117.09  119.79
   4  10  -5 2999.90   96.19
   4  10  -5 2985.80   81.29
   3 -10  -5   21.90    6.90
  -3 -10   5    0.00   10.50
   3  10  -5   19.20    7.80
  -3  10   5   27.60   16.70
   3  10  -5   22.80    5.60
  -3  10   5   15.80    9.90
  -2 -10   5  489.75   27.30
   2 -10  -5  473.35   22.20
   2  10  -5  523.85   21.50
  -2  10   5  442.16   34.00
  -2  10   5  476.75   25.50
   2  10  -5  460.35   22.50
  -1 -10   5  324.17   20.10
   1 -10  -5  341.67   18.50
   1  10  -5  333.27   17.90
  -1  10   5  346.57   28.40
  -1  10   5  329.67   19.20
   1  10  -5  282.07   16.40
   0 -10  -5  458.15   22.50
   0 -10   5  452.15   22.80
   0  10   5  404.76   28.40
   0  10  -5  467.45   19.70
   0  10   5  502.85   21.60
   0  10  -5  463.05   22.80
  -1 -10  -5  813.12   33.10
   1 -10   5  821.22   33.80
   1  10   5  848.22   29.80
   1  10   5  822.82   40.90
  -1  10  -5  869.81   29.30
  -1  10  -5  829.82   33.60
  -2 -10  -5  263.97   17.70
   2 -10   5  263.07   17.20
  -2  10  -5  253.17   13.80
   2  10   5  270.57   22.80
   2  10   5  252.47   13.50
  -2  10  -5  256.27   18.80
   3 -10   5  567.74   29.20
  -3 -10  -5  543.75   26.80
   3  10   5  541.75   20.70
  -3  10  -5  545.45   28.60
   3  10   5  564.44   34.00
  -3  10  -5  576.94   23.40
  -4 -10  -5 1097.69   42.60
   4 -10   5 1078.79   49.40
  -4  10  -5 1103.99   44.60
   4  10   5 1079.79   53.69
  -5 -10  -5    3.20    7.80
   5  10   5   23.50   13.90
   6 -10   5  227.98   27.80
  -6  10  -5  244.88   24.10
   6  10   5  286.77   33.10
   7 -10   5  166.58   27.10
   7  10   5  169.88   28.70
  -7  10  -5  154.68   20.20
   9 -11  -5  288.67   33.20
  -9  11   5  199.68   38.90
   9  11  -5  321.97   31.00
   9  11  -5  270.47   39.00
   8 -11  -5  172.88   25.60
   8  11  -5  144.79   27.90
  -8  11   5  131.49   33.40
   8  11  -5  158.48   21.90
   7 -11  -5  113.79   20.00
   7  11  -5  152.98   20.50
  -7  11   5  125.89   28.40
  -6 -11   5  158.58   25.60
   6 -11  -5  179.68   15.60
   6 -11  -5  228.08   25.30
  -6  11   5  158.48   30.10
   6  11  -5  206.18   21.50
   5 -11  -5  260.97   16.90
  -5 -11   5  258.07   28.70
   5 -11  -5  276.47   26.10
   5  11  -5  290.27   21.70
  -5  11   5  304.87   35.60
   4 -11  -5    2.50    5.60
  -4 -11   5    7.40   13.40
   4  11  -5    0.00    7.00
  -4  11   5   23.00   18.90
   4  11  -5    0.00    4.00
  -3 -11   5 1093.49   48.80
   3 -11  -5 1084.89   38.80
  -3  11   5 1135.19   56.59
  -3  11   5 1057.79   44.40
   3  11  -5 1109.09   35.70
   3  11  -5 1128.89   42.60
   2 -11  -5    4.40    5.40
  -2 -11   5    0.00    8.90
  -2  11   5   15.00    7.40
   2  11  -5    0.00    4.20
  -2  11   5    4.70   14.30
   2  11  -5    3.30    5.40
   1 -11  -5  931.31   35.10
  -1  11   5  987.30   36.50
  -1  11   5  923.51   47.00
   1  11  -5  912.41   34.40
   1  11  -5  919.81   34.20
   0 -11   5  117.59   11.90
   0 -11  -5   97.89   11.90
   0  11   5  136.29   12.50
   0  11  -5  111.99   13.20
   0  11  -5  134.09   11.50
   0  11   5  104.09   17.50
   1 -11   5   27.80    7.30
  -1 -11  -5   25.10    7.80
  -1  11  -5   18.80    5.60
  -1  11  -5    9.30    7.20
   1  11   5   27.20   12.10
   1  11   5   18.70    6.30
  -2 -11  -5  476.85   23.60
   2 -11   5  418.56   22.30
  -2  11  -5  369.46   23.00
   2  11   5  441.26   29.00
   2  11   5  456.85   18.90
  -2  11  -5  446.16   19.30
  -3 -11  -5  230.78   17.60
   3 -11   5  210.28   18.10
  -3  11  -5  245.48   14.80
   3  11   5  242.68   25.40
   3  11   5  236.78   12.80
  -3  11  -5  224.78   20.30
   4 -11   5  747.13   39.40
  -4 -11  -5  844.62   35.40
   4  11   5  854.81   45.50
  -4  11  -5  795.52   36.90
   5 -11   5  975.90   48.70
  -5 -11  -5 1010.30   41.30
  -5  11  -5 1020.10   43.80
   5  11   5  937.81   52.09
   6 -11   5   48.60   16.90
   6  11   5   83.79   20.60
  -6  11  -5   34.00   12.50
   7 -11   5    0.00   14.80
   7  11   5   42.20   20.00
  -7  11  -5    0.00    9.90
   9 -12  -5   50.09   18.50
   9  12  -5   59.09   16.10
  -9  12   5   56.19   27.00
   9  12  -5   74.79   25.10
   8 -12  -5    1.30   13.20
   8  12  -5   12.00   18.00
   8  12  -5    0.00   11.80
  -8  12   5   12.40   23.40
   7 -12  -5    0.50   10.70
   7  12  -5    0.00   14.90
   7  12  -5   12.70   10.90
  -7  12   5   14.00   19.80
   6 -12  -5   53.09   13.90
   6 -12  -5    0.00    5.90
   6  12  -5    1.10    8.30
  -6  12   5   17.90   20.40
   5 -12  -5   79.89   10.90
   5 -12  -5   96.69   17.10
  -5 -12   5   92.19   19.70
   5  12  -5   78.39   14.40
  -5  12   5  105.29   25.00
   4 -12  -5  394.76   20.90
  -4 -12   5  437.16   30.90
   4  12  -5  441.76   17.50
  -4  12   5  420.06   37.40
   4  12  -5  387.86   24.30
  -4  12   5  383.36   26.40
  -3 -12   5   70.99   15.00
   3 -12  -5   62.19    9.80
  -3  12   5   40.90   19.50
   3  12  -5   57.59    8.30
   3  12  -5   56.59   10.30
  -3  12   5   56.19   12.00
  -2 -12   5  212.08   18.70
   2 -12  -5  219.88   15.20
  -2  12   5  295.87   30.40
   2  12  -5  226.88   14.70
  -2  12   5  217.58   19.50
   2  12  -5  218.78   15.90
   1 -12  -5  169.88   15.20
  -1 -12   5  160.18   15.80
   1  12  -5  197.98   16.30
  -1  12   5  212.48   15.70
   1  12  -5  158.78   13.00
  -1  12   5  199.08   24.00
   0 -12   5  125.69   11.80
   0 -12  -5  111.49   12.30
   0  12  -5  122.79   14.00
   0  12   5  135.99   19.40
   0  12  -5  131.59   11.60
   0  12   5  120.39   12.20
   1 -12   5   68.89    9.20
  -1 -12  -5   68.99   11.20
   1  12   5   70.29   15.60
   1  12   5   74.89    9.30
  -1  12  -5   75.59    8.80
  -1  12  -5   92.89   12.90
  -2 -12  -5  596.04   27.80
   2 -12   5  584.24   27.20
  -2  12  -5  598.14   24.00
  -2  12  -5  557.04   28.60
   2  12   5  608.94   23.70
   2  12   5  565.44   34.00
   3 -12   5   87.49   13.30
  -3 -12  -5   85.79   12.30
  -3  12  -5   79.89   13.60
   3  12   5   89.99   17.50
   3  12   5   65.89    8.50
  -3  12  -5   74.99    9.90
   4 -12   5    2.30    9.60
  -4 -12  -5    0.20    7.10
  -4  12  -5    0.00    8.10
   4  12   5   33.60   13.50
   5 -12   5   52.29   14.80
  -5 -12  -5   41.80   11.00
  -5  12  -5   57.39   12.90
   6 -12   5   88.89   20.30
   6  12   5   92.19   21.30
  -6  12  -5   83.49   16.30
  -7  12  -5    0.00   10.50
   7  12   5   23.70   17.40
   9 -13  -5  119.19   23.80
   9  13  -5   66.69   17.80
   9  13  -5   85.09   26.20
  -9  13   5   70.89   29.00
   8 -13  -5   32.50   16.60
  -8  13   5   83.09   29.20
   8  13  -5   55.89   16.40
   8  13  -5   38.10   21.20
   7 -13  -5   28.40   13.90
   7  13  -5   54.09   14.20
   7  13  -5   39.60   19.30
  -7  13   5   68.99   26.40
   6 -13  -5  143.79   21.20
   6 -13  -5  130.49   14.10
   6  13  -5  163.28   20.50
  -6  13   5  154.58   29.70
  -5 -13   5   80.79   19.10
   5 -13  -5   80.99   16.30
   5 -13  -5   95.29   12.30
  -5  13   5   87.69   25.20
   5  13  -5   68.49   13.80
  -4 -13   5    0.00   11.80
   4 -13  -5    0.00    5.10
  -4  13   5    0.60    9.10
   4  13  -5    0.00    4.60
   4  13  -5    0.00    6.40
  -4  13   5    9.90   19.10
   3 -13  -5  527.25   25.00
  -3 -13   5  591.24   31.40
   3  13  -5  547.35   27.00
   3  13  -5  506.95   21.80
  -3  13   5  550.14   39.60
  -3  13   5  494.75   28.60
  -2 -13   5   10.80    9.70
   2 -13  -5   32.20    8.20
  -2  13   5   28.30   18.00
  -2  13   5   18.10    8.30
   2  13  -5   19.80    7.20
   2  13  -5   20.20    6.60
   1 -13  -5  372.86   20.80
  -1  13   5  384.56   21.20
   1  13  -5  409.26   20.30
   1  13  -5  452.35   21.80
  -1  13   5  413.16   33.00
   0 -13  -5    0.30    5.20
   0  13   5    0.00   11.80
   0  13  -5    0.20    6.00
   0  13   5    0.00    5.50
   0  13  -5    4.90    4.90
   1 -13   5    1.50    6.10
  -1 -13  -5   12.90    7.00
   1  13   5    5.10   11.40
  -1  13  -5    0.00    5.40
  -1  13  -5    0.00    4.50
   1  13   5    0.90    5.40
  -2 -13  -5  466.55   24.70
   2 -13   5  484.25   23.90
   2  13   5  535.55   22.00
  -2  13  -5  472.65   26.10
   2  13   5  454.95   30.90
  -2  13  -5  512.65   22.40
   3 -13   5  237.58   18.20
  -3 -13  -5  234.58   17.70
   3  13   5  200.38   13.60
   3  13   5  224.38   25.10
  -3  13  -5  184.58   18.80
  -3  13  -5  258.27   16.30
   4 -13   5   14.60   11.10
  -4 -13  -5    9.30    7.50
  -4  13  -5   15.40    9.30
   4  13   5    9.90   12.70
   5 -13   5  206.18   24.60
  -5 -13  -5  218.08   20.60
  -5  13  -5  221.28   22.40
   5  13   5  200.38   28.30
  -6  13  -5   10.10   10.50
   6  13   5   11.20   15.20
  -7  13  -5  112.49   18.90
   7  13   5  148.99   28.00
   9 -14  -5  138.39   25.40
   9  14  -5  172.68   24.00
   9  14  -5  138.19   29.90
  -9  14   5  188.28   37.40
   8 -14  -5  304.37   33.50
  -8  14   5  405.96   48.80
   8  14  -5  319.27   38.40
   8  14  -5  384.66   30.00
   7 -14  -5  215.48   26.30
   7  14  -5  240.28   32.50
   7  14  -5  265.47   25.50
  -7  14   5  216.28   36.30
   6 -14  -5  245.68   26.80
   6 -14  -5  202.78   17.50
   6  14  -5  218.08   22.50
   6  14  -5  166.98   25.80
  -6  14   5  170.48   31.80
   5 -14  -5  238.88   17.20
   5  14  -5  203.38   20.90
  -5  14   5  282.47   35.80
   4 -14  -5  730.63   31.20
  -4 -14   5  763.72   40.20
  -4  14   5  718.63   37.90
   4  14  -5  782.42   34.80
  -4  14   5  767.72   49.00
  -3 -14   5    5.20   10.90
   3 -14  -5    0.90    5.80
  -3  14   5   27.10   18.40
  -3  14   5    3.80    8.10
   3  14  -5    9.10    5.70
   3  14  -5    0.00    6.20
  -2 -14   5 1827.22   64.89
   2 -14  -5 1743.63   57.19
   2  14  -5 1744.33   58.49
  -2  14   5 1743.23   61.29
   2  14  -5 1752.62   54.99
  -2  14   5 1645.54   75.79
   1 -14  -5  181.58   16.80
  -1  14   5  165.78   23.80
   1  14  -5  170.18   13.40
  -1  14   5  184.98   16.80
   1  14  -5  185.48   16.00
   0 -14  -5  292.97   18.70
   0  14   5  285.37   27.60
   0  14   5  246.08   17.00
   0  14  -5  274.87   16.00
   0  14  -5  276.97   18.70
   1 -14   5  741.23   30.00
  -1 -14  -5  722.03   31.90
  -1  14  -5  734.53   28.70
   1  14   5  803.82   29.80
   1  14   5  664.93   39.30
  -1  14  -5  762.92   33.10
  -2 -14  -5  200.38   17.90
   2 -14   5  204.08   15.20
   2  14   5  246.68   15.00
  -2  14  -5  211.68   19.50
   2  14   5  231.08   24.70
  -2  14  -5  192.48   14.30
  -3 -14  -5  612.34   29.50
   3  14   5  607.54   36.60
  -3  14  -5  625.24   27.60
  -3  14  -5  653.63   32.10
   3  14   5  655.33   25.40
  -4 -14  -5  176.48   18.00
   4  14   5  185.48   24.30
  -4  14  -5  215.88   20.80
  -5 -14  -5   63.49   12.40
  -5  14  -5   38.40   12.30
   5  14   5   31.30   16.00
   6  14   5  164.48   28.20
  -6  14  -5  172.58   21.60
   7  14   5  171.68   29.80
  -7  14  -5  143.99   20.70
   8 -15  -5  309.47   34.00
   8  15  -5  310.47   38.00
   8  15  -5  446.86   30.80
  -8  15   5  246.68   40.80
   7 -15  -5  219.28   27.10
   7  15  -5  206.38   29.50
   7  15  -5  216.68   23.40
  -7  15   5  175.58   33.80
   6 -15  -5  260.07   18.50
   6 -15  -5  238.08   27.70
   6  15  -5  185.68   26.20
  -6  15   5  195.48   32.80
   6  15  -5  251.27   24.20
   5 -15  -5  255.07   18.10
  -5  15   5  256.57   27.00
  -5  15   5  239.88   34.20
   5  15  -5  273.37   21.60
   5  15  -5  248.48   27.20
  -4 -15   5    0.00    5.10
   4 -15  -5    0.60    6.40
  -4  15   5   15.80   20.40
  -4  15   5    0.00    9.10
   4  15  -5   13.10    8.80
  -3 -15   5  964.80   43.60
   3 -15  -5  984.40   38.00
  -3  15   5  955.20   54.19
   3  15  -5  991.80   34.70
  -3  15   5 1034.90   44.10
   3  15  -5 1009.10   40.10
  -2 -15   5  151.08   14.20
   2 -15  -5  128.89   14.10
   2  15  -5  144.69   15.10
   2  15  -5  149.59   13.80
  -2  15   5  122.89   24.80
  -2  15   5  144.69   16.80
   1 -15  -5  975.30   37.90
   1  15  -5  973.20   37.10
   1  15  -5  980.20   37.20
  -1  15   5  972.00   51.69
  -1  15   5 1016.80   39.50
   0 -15  -5  444.86   24.00
   0  15  -5  484.65   24.80
   0  15  -5  496.95   22.50
   0  15   5  469.25   23.40
   0  15   5  416.66   32.20
  -1 -15  -5   21.70    7.90
   1  15   5   30.60   14.40
  -1  15  -5   17.40    8.90
   1  15   5   21.70    7.60
  -1  15  -5   19.80    6.80
  -2 -15  -5  207.58   18.70
   2  15   5  226.58   25.10
  -2  15  -5  200.38   14.70
   2  15   5  231.28   15.20
  -2  15  -5  244.08   20.70
  -3 -15  -5  266.97   19.40
  -3  15  -5  213.18   18.00
   3  15   5  226.98   25.60
   3  15   5  271.17   15.90
  -3  15  -5  244.48   22.30
  -4 -15  -5  318.07   21.80
   4  15   5  302.37   27.20
  -4  15  -5  313.17   23.60
  -5 -15  -5  385.16   24.70
  -5  15  -5  379.56   26.50
   5  15   5  400.96   33.80
   6  15   5  148.19   26.50
  -6  15  -5  151.88   20.90
   7  15   5   25.90   19.60
  -7  15  -5    0.00   10.40
   8 -16  -5   17.60   16.20
   8  16  -5    7.60   11.60
   8  16  -5   32.10   20.50
  -8  16   5   11.60   24.40
   7 -16  -5    6.50   13.60
  -7  16   5    2.10   23.10
   7  16  -5    0.00   14.20
   7  16  -5    6.40   11.30
   6 -16  -5   93.29   13.60
   6 -16  -5  101.59   18.90
   6  16  -5  102.29   15.90
  -6  16   5  100.29   26.60
   6  16  -5   73.99   19.90
   5 -16  -5   58.39   11.10
  -5  16   5   72.19   16.70
   5  16  -5   68.89   12.60
   5  16  -5   66.59   17.90
  -5  16   5   35.30   22.50
   4 -16  -5  211.68   18.50
   4  16  -5  208.18   19.80
  -4  16   5  191.18   30.80
   4  16  -5  221.58   23.00
  -4  16   5  195.78   22.00
   3 -16  -5   31.80    8.80
   3  16  -5   38.30    9.70
   3  16  -5   41.50    8.40
  -3  16   5   29.60   11.70
  -3  16   5   47.40   21.30
   2 -16  -5    0.20    6.20
  -2  16   5    0.00    6.90
   2  16  -5    0.00    5.50
   2  16  -5    0.00    5.90
  -2  16   5   28.40   18.90
   1 -16  -5  100.89   12.80
   1  16  -5  130.09   14.40
  -1  16   5  130.09   22.70
  -1  16   5  105.89   13.70
   1  16  -5  103.29   12.10
   0 -16  -5  281.57   18.70
   0  16   5  263.17   28.10
   0  16   5  270.17   18.10
   0  16  -5  236.28   20.20
   0  16  -5  275.67   16.90
  -1 -16  -5   60.69   11.20
  -1  16  -5   70.59   10.10
  -1  16  -5   62.69   11.50
   1  16   5   52.39   10.00
   1  16   5   50.79   16.30
  -2 -16  -5   33.20    9.10
  -2  16  -5   40.70    8.80
   2  16   5   30.40    8.50
   2  16   5   35.30   14.30
  -2  16  -5   26.90    9.90
  -3 -16  -5   17.50    8.70
   3  16   5   15.60   13.00
  -3  16  -5   16.40    8.90
  -3  16  -5    7.50    7.00
   3  16   5   10.20    7.00
  -4 -16  -5   19.40    9.00
  -4  16  -5   22.40   10.40
   4  16   5   40.20   15.10
  -5 -16  -5   17.70    9.60
  -5  16  -5    3.20    9.40
   5  16   5   28.10   15.70
   6  16   5  172.58   28.20
  -6  16  -5  142.39   20.50
   8 -17  -5   74.79   21.00
   8  17  -5   89.99   17.30
   8  17  -5   75.89   24.00
  -8  17   5   91.79   31.80
   7 -17  -5   78.09   13.10
   7 -17  -5   67.19   19.00
  -7  17   5   84.09   29.20
   7  17  -5   70.79   15.40
   7  17  -5   82.99   22.10
   6 -17  -5   13.80    8.70
   6  17  -5    9.90   14.70
  -6  17   5   21.00   22.50
   6  17  -5   10.60    9.20
   5 -17  -5    3.70    7.30
  -5  17   5    7.20   11.40
  -5  17   5    0.00   20.00
   5  17  -5    5.40    8.60
   5  17  -5    0.50   13.60
   4 -17  -5    0.50    7.00
  -4  17   5   10.50   21.00
  -4  17   5    0.00    9.50
   4  17  -5    0.00    7.40
   3 -17  -5  281.47   19.40
   3  17  -5  289.77   17.50
  -3  17   5  306.77   23.70
  -3  17   5  335.27   37.10
   3  17  -5  289.77   19.80
   2 -17  -5   26.80    8.50
   2  17  -5   35.30    9.00
  -2  17   5   15.20   19.30
  -2  17   5   17.70    9.60
   2  17  -5   47.50    9.70
   1 -17  -5  409.06   22.60
   1  17  -5  361.06   21.50
   1  17  -5  400.96   21.50
  -1  17   5  407.66   34.80
  -1  17   5  363.46   22.10
   0 -17  -5   12.30    7.70
   0  17  -5   13.00    7.70
   0  17   5   44.60   17.20
   0  17   5   36.70    9.20
   0  17  -5   15.80    6.90
  -1 -17  -5   56.49   11.00
   1  17   5   43.70    9.40
  -1  17  -5   51.99    9.50
  -1  17  -5   44.30   11.20
   1  17   5   53.29   16.50
  -2 -17  -5   62.19   11.80
   2  17   5   79.19   11.40
  -2  17  -5   68.19   13.20
  -2  17  -5   68.79   10.50
   2  17   5   73.69   17.60
  -3 -17  -5  133.19   16.20
   3  17   5  132.69   13.80
  -3  17  -5  139.19   17.60
  -3  17  -5  150.98   16.10
   3  17   5  156.78   22.80
  -4 -17  -5   57.39   12.20
  -4  17  -5   34.80   12.10
   4  17   5   55.99   17.40
  -5 -17  -5   53.29   12.90
   5  17   5   39.00   17.20
  -5  17  -5   38.00   13.00
  -6  17  -5   27.90   13.30
   6  17   5   22.30   17.50
   8 -18  -5  476.85   38.20
   8  18  -5  494.25   33.40
  -8  18   5  423.16   51.99
   7 -18  -5  295.97   22.70
   7 -18  -5  342.47   34.90
   7  18  -5  331.67   26.50
  -7  18   5  339.67   43.50
   6 -18  -5   24.80    9.20
   6  18  -5    2.60    9.10
  -6  18   5   41.40   23.80
   5 -18  -5  107.79   14.40
  -5  18   5  137.49   21.10
   5  18  -5  105.99   16.30
  -5  18   5  103.59   27.00
   4 -18  -5  321.37   20.90
  -4  18   5  322.87   38.50
  -4  18   5  308.17   24.70
   4  18  -5  301.17   21.70
   3 -18  -5    7.40    7.60
  -3  18   5    4.10    8.50
   3  18  -5    7.00    7.50
  -3  18   5   26.90   22.10
   2 -18  -5 1759.72   60.19
  -2  18   5 1837.32   64.39
   2  18  -5 1740.63   60.89
   2  18  -5 1778.02   57.49
  -2  18   5 1746.33   79.89
   1 -18  -5    1.80    6.20
   1  18  -5    2.40    6.00
   1  18  -5    2.40    6.90
  -1  18   5    0.00    7.30
  -1  18   5    0.00   16.70
   0 -18  -5  240.88   18.10
   0  18   5  196.58   26.50
   0  18  -5  192.58   15.30
   0  18  -5  230.68   20.60
   0  18   5  186.98   17.70
  -1 -18  -5  411.16   23.80
   1  18   5  412.16   32.10
   1  18   5  414.46   22.50
  -1  18  -5  430.36   22.50
  -1  18  -5  405.96   25.10
  -2 -18  -5  150.48   16.90
  -2  18  -5  148.19   17.40
   2  18   5  164.78   16.00
  -2  18  -5  160.98   15.80
   2  18   5  153.18   22.60
  -3 -18  -5  380.56   23.60
  -3  18  -5  369.36   23.10
   3  18   5  368.16   20.00
  -3  18  -5  331.47   24.30
   3  18   5  316.47   28.40
  -4 -18  -5  347.17   23.00
   4  18   5  282.47   27.90
  -4  18  -5  330.77   28.10
  -5  18  -5   48.80   13.40
   5  18   5   14.00   15.20
   6  18   5  145.69   27.10
  -6  18  -5  174.48   22.70
   8 -19  -5  106.49   24.10
  -8  19   5  110.09   34.70
   8  19  -5  119.69   20.30
   7 -19  -5  121.69   16.70
   7 -19  -5  137.19   23.40
  -7  19   5  107.99   30.80
   7  19  -5  148.49   20.30
   6 -19  -5  399.56   24.50
   6  19  -5  385.06   26.60
  -6  19   5  309.77   40.50
  -6  19   5  354.16   34.40
   5 -19  -5  107.49   14.90
  -5  19   5  119.29   27.90
  -5  19   5   99.19   18.90
   5  19  -5  134.99   17.90
   4 -19  -5  252.77   21.40
   4  19  -5  258.87   20.60
  -4  19   5  281.07   37.00
  -4  19   5  245.38   25.80
   3 -19  -5  845.42   35.30
   3  19  -5  801.02   35.30
  -3  19   5  696.43   36.90
  -3  19   5  775.32   49.90
   2 -19  -5   28.40    9.30
  -2  19   5   41.00   21.30
  -2  19   5   21.30    9.20
   2  19  -5   20.90    8.50
   2  19  -5   20.00    8.30
   1 -19  -5  451.65   25.20
  -1  19   5  452.85   38.50
  -1  19   5  484.05   26.00
   1  19  -5  436.16   24.50
   1  19  -5  447.66   23.90
   0 -19  -5  412.06   24.10
   0  19   5  416.26   24.00
   0  19   5  331.57   32.80
   0  19  -5  430.96   24.90
   0  19  -5  451.25   23.10
  -1 -19  -5    0.00    4.80
   1  19   5    1.80    7.20
  -1  19  -5    0.00    6.20
  -1  19  -5    0.00    7.30
   1  19   5    4.00   14.20
  -2 -19  -5  446.06   25.90
  -2  19  -5  433.56   27.00
   2  19   5  462.35   33.00
   2  19   5  440.96   23.60
  -2  19  -5  407.56   23.40
  -3 -19  -5   48.00   11.50
   3  19   5   64.79   17.40
  -3  19  -5   76.49   14.50
  -3  19  -5   56.09   11.60
   3  19   5   47.60   10.70
  -4 -19  -5  137.69   17.20
  -4  19  -5   96.09   16.20
   4  19   5  130.49   22.30
   5  19   5  358.06   32.60
  -5  19  -5  346.97   30.10
   6  19   5  110.49   24.50
  -6  19  -5  117.69   19.70
   8 -20  -5   16.70   17.90
   8  20  -5    6.40   12.90
  -8  20   5    0.00   26.60
   7 -20  -5   10.50   13.60
   7 -20  -5    0.00    9.10
   7  20  -5   19.30   12.00
  -7  20   5    0.00   24.20
   6 -20  -5   83.09   14.20
   6  20  -5   50.89   13.80
  -6  20   5   42.40   25.00
  -6  20   5   90.79   20.00
   5 -20  -5  141.29   16.70
  -5  20   5  171.78   32.10
  -5  20   5  144.29   21.90
   5  20  -5  150.58   18.00
   4 -20  -5  109.99   14.90
  -4  20   5  149.39   30.10
  -4  20   5  109.49   18.40
   4  20  -5  103.99   15.60
  -3 -20   5   71.49   11.10
   3 -20  -5   44.90   10.80
   3  20  -5   80.89   13.10
  -3  20   5   72.69   14.80
  -3  20   5   60.79   22.60
   2 -20  -5  136.09   16.00
   2  20  -5  180.18   17.00
  -2  20   5  175.48   28.60
   2  20  -5  166.58   16.70
  -2  20   5  162.08   19.10
   1 -20  -5   12.50    8.20
  -1  20   5   11.30   18.80
  -1  20   5   10.20    8.50
   1  20  -5   24.50    8.40
   1  20  -5   13.50    8.60
   0 -20  -5  298.87   20.70
   0  20  -5  283.07   19.10
   0  20  -5  269.47   20.60
   0  20   5  301.67   20.10
   0  20   5  297.77   32.00
  -1 -20  -5  353.66   23.00
  -1  20  -5  360.86   21.70
  -1  20  -5  323.77   23.00
   1  20   5  363.06   21.80
   1  20   5  349.47   30.90
  -2 -20  -5   26.60    9.60
  -2  20  -5   39.20   10.10
  -2  20  -5   40.10   11.50
   2  20   5   53.99   11.50
   2  20   5   41.60   16.70
  -3 -20  -5   81.39   13.80
  -3  20  -5  103.49   14.80
   3  20   5   76.59   19.60
   3  20   5   92.39   13.60
  -3  20  -5   70.89   14.30
  -4 -20  -5    0.00    8.10
   4  20   5    2.20   14.00
  -4  20  -5    3.70    9.50
   5  20   5   27.30   17.10
  -5  20  -5    0.00   10.50
   6  20   5  119.49   25.70
  -6  20  -5  143.69   21.80
   7 -21  -5  124.19   17.80
   7 -21  -5  132.89   23.60
   7  21  -5  145.69   20.90
  -7  21   5  110.99   32.10
   6 -21  -5    0.00    9.00
   6  21  -5   11.60   10.50
  -6  21   5    0.00   13.70
  -6  21   5    0.00   22.40
   5 -21  -5   20.60   10.00
  -5  21   5   28.30   23.70
  -5  21   5   16.80   14.00
   5  21  -5   25.40   10.50
   4 -21  -5    0.00    7.50
  -4  21   5   12.00   11.20
  -4  21   5    3.70   22.00
   4  21  -5    2.60    8.40
   3 -21  -5  196.48   19.60
  -3 -21   5  142.99   15.10
   3  21  -5  144.09   16.90
  -3  21   5  160.98   29.80
  -3  21   5  165.58   20.50
   2 -21  -5   14.80    8.60
   2  21  -5    1.20    7.30
  -2  21   5    9.40   10.00
  -2  21   5   29.10   20.00
   2  21  -5   13.80    8.00
   1 -21  -5  173.48   18.40
   1  21  -5  176.48   17.40
  -1  21   5  235.38   30.50
  -1  21   5  229.78   21.80
   1  21  -5  213.28   19.60
   0 -21  -5    0.00    7.40
   0  21  -5   15.00    8.30
   0  21   5   18.90   16.50
   0  21  -5   13.40    7.90
   0  21   5    2.00    8.10
  -1 -21  -5    1.00    7.70
   1  21   5    0.00    7.80
  -1  21  -5   11.70    8.80
   1  21   5    7.10   14.50
  -1  21  -5    0.00    7.50
  -2 -21  -5   85.89   14.00
   2  21   5  122.59   15.50
  -2  21  -5  105.29   15.80
  -2  21  -5  104.79   14.50
   2  21   5  117.19   21.30
  -3 -21  -5  172.58   18.90
   3  21   5  168.28   17.30
   3  21   5  159.88   24.50
  -3  21  -5  178.98   20.00
  -3  21  -5  187.18   20.00
  -4 -21  -5   25.80   11.10
   4  21   5   25.00   15.90
  -4  21  -5    6.30   10.00
   5  21   5    1.30   14.60
  -5  21  -5    0.00    9.70
   7 -22  -5  283.77   25.00
  -7  22   5  232.08   40.00
   7  22  -5  345.27   27.10
   6 -22  -5   45.00   13.10
  -6  22   5   38.70   26.00
   6  22  -5   30.70   11.60
  -6  22   5   32.70   17.30
   5 -22  -5  187.48   19.70
   5  22  -5  207.38   22.70
  -5  22   5  205.28   35.50
  -5  22   5  207.68   26.40
   4 -22  -5  497.25   28.10
   4  22  -5  463.35   27.50
  -4  22   5  524.85   44.40
  -4  22   5  436.36   31.70
   3 -22  -5   29.40   10.20
  -3 -22   5   23.30    9.20
   3  22  -5   13.90    9.30
  -3  22   5   17.40   11.10
  -3  22   5   48.70   22.90
   2 -22  -5  918.71   39.50
  -2  22   5  901.11   41.40
   2  22  -5  910.91   39.00
  -2  22   5  873.41   53.09
   1 -22  -5  141.09   17.20
  -1  22   5  115.39   16.40
   1  22  -5   91.79   13.90
   1  22  -5   87.69   13.10
  -1  22   5  139.99   25.40
   0 -22  -5   24.50    9.40
   0  22   5   39.30   18.10
   0  22  -5   27.60   10.30
   0  22  -5   25.60    9.00
   0  22   5   19.00    9.00
  -1 -22  -5  268.27   20.50
   1  22   5  316.67   31.90
   1  22   5  245.38   19.70
  -1  22  -5  272.67   20.30
  -1  22  -5  255.47   23.10
  -2 -22  -5   23.30   10.00
  -2  22  -5   23.90   10.20
   2  22   5   28.90   16.50
  -2  22  -5   20.70   10.10
   2  22   5   18.30    9.70
  -3 -22  -5  457.95   27.80
  -3  22  -5  476.45   29.80
  -3  22  -5  466.05   28.60
   3  22   5  457.05   35.30
   3  22   5  514.45   26.60
  -4 -22  -5  802.32   37.30
   4  22   5  694.93   44.80
  -4  22  -5  674.83   37.80
  -5  22  -5    0.00   11.90
   5  22   5    9.20   15.70
   7 -23  -5   28.00   12.00
   7  23  -5    1.20   10.40
   6 -23  -5  408.56   27.30
  -6  23   5  416.46   38.80
   6  23  -5  453.55   30.60
  -6  23   5  392.76   47.20
   5 -23  -5  124.39   16.90
  -5  23   5  127.99   30.20
   5  23  -5  112.89   16.90
  -5  23   5  101.69   18.90
   4 -23  -5  294.77   22.30
   4  23  -5  309.27   23.00
  -4  23   5  309.67   41.00
  -4  23   5  273.27   27.80
   3 -23  -5  476.95   27.30
  -3 -23   5  438.66   24.50
  -3  23   5  418.56   43.10
  -3  23   5  373.86   28.30
   3  23  -5  448.56   26.20
  -2 -23   5   17.20    9.30
   2 -23  -5    4.30    8.10
  -2  23   5   16.20   11.30
  -2  23   5   14.30   20.50
   2  23  -5   14.70    8.70
   1 -23  -5  154.58   17.50
  -1  23   5  189.48   20.50
   1  23  -5  183.88   18.90
   1  23  -5  188.18   18.60
  -1  23   5  157.68   27.80
   0 -23  -5  446.86   26.60
   0  23   5  420.46   26.40
   0  23   5  425.16   36.40
   0  23  -5  448.96   26.40
   0  23  -5  455.55   25.80
  -1 -23  -5    2.10    8.00
  -1  23  -5    5.30    8.40
   1  23   5   39.70   17.30
  -1  23  -5   22.90   10.20
   1  23   5   19.40    9.10
  -2 -23  -5  692.33   35.30
   2  23   5  714.63   34.80
  -2  23  -5  747.73   37.50
  -2  23  -5  783.72   35.90
   2  23   5  751.62   45.40
  -3 -23  -5  160.28   19.20
  -3  23  -5  147.19   19.60
   3  23   5  202.68   20.30
   3  23   5  181.58   26.30
  -3  23  -5  136.99   19.50
  -4 -23  -5   63.19   14.70
   4  23   5   45.70   17.80
  -4  23  -5   38.10   13.80
   5  23   5  238.48   32.20
  -5  23  -5  256.07   26.60
   7 -24  -5    0.00   10.20
  -7  24   5    0.00   15.20
   7  24  -5    6.20   11.40
   6 -24  -5    0.00    9.30
   6  24  -5    0.00    8.80
  -6  24   5    8.40   14.00
   5 -24  -5  423.56   27.60
  -5  24   5  403.06   36.60
   5  24  -5  437.16   28.60
   4 -24  -5   33.50   11.20
  -4  24   5   28.00   13.50
   4  24  -5   39.30   11.90
  -4  24   5    7.30   24.10
  -3 -24   5   19.20    8.80
   3 -24  -5    3.50    8.60
   3  24  -5   15.00    9.20
  -3  24   5    3.10   20.50
  -3  24   5    4.50   10.10
   2 -24  -5    1.00    7.60
  -2 -24   5    0.00    8.10
   2  24  -5    0.00    7.80
  -2  24   5    1.10    9.70
  -2  24   5    0.00   18.30
   1 -24  -5  110.09   15.90
   1  24  -5  108.59   14.60
  -1  24   5  127.89   26.30
  -1  24   5   91.69   15.50
   1  24  -5   80.79   14.50
   0 -24  -5   53.29   12.10
   0  24  -5   33.60    9.80
   0  24  -5   34.00   10.60
   0  24   5   40.50   19.50
   0  24   5   29.20   11.40
  -1 -24  -5  377.76   25.10
   1  24   5  383.76   24.90
  -1  24  -5  340.47   24.80
  -1  24  -5  394.76   24.90
   1  24   5  401.46   35.00
  -2 -24  -5   14.40    9.70
  -2  24  -5    0.10    9.10
   2  24   5   17.70   16.40
   2  24   5    0.00    9.00
  -2  24  -5    0.00    8.80
  -3 -24  -5    2.30    9.60
  -3  24  -5    0.00   10.00
   3  24   5   25.70   17.00
  -3  24  -5    5.90    9.80
  -4 -24  -5   34.10   11.60
   4  24   5   37.50   16.20
  -4  24  -5    4.70   11.60
  -5  24  -5    5.80   11.80
   5  24   5    4.50   14.10
   6 -25  -5    0.00   10.00
  -6  25   5    5.30   14.10
   6  25  -5    0.00    9.00
   5 -25  -5   13.40   10.70
  -5  25   5   14.80   14.60
   5  25  -5   20.40   11.50
   4 -25  -5    0.00    8.80
  -4  25   5    7.60   11.10
   4  25  -5    0.00    7.70
  -3 -25   5  387.36   24.00
   3 -25  -5  400.76   26.20
   3  25  -5  398.96   25.50
  -3  25   5  412.56   29.90
   2 -25  -5   39.80   10.90
  -2 -25   5   23.20   10.30
   2  25  -5   15.80    9.00
  -2  25   5   30.40   12.50
  -2  25   5   45.90   23.90
   1 -25  -5   30.10   10.90
  -1  25   5   21.90   20.50
   1  25  -5   24.00   10.30
  -1  25   5   42.70   12.90
   0 -25  -5    1.80    8.20
   0  25  -5    0.00    7.70
   0  25   5    0.00   17.80
   0  25   5    6.80   10.00
   0  25  -5    0.00    7.70
  -1 -25  -5   11.30    9.70
  -1  25  -5   16.00    9.70
   1  25   5    6.50   17.30
   1  25   5    0.00    9.30
  -1  25  -5    4.20    8.80
  -2 -25  -5  106.69   16.80
   2  25   5  105.79   16.80
   2  25   5   74.39   21.40
  -2  25  -5   93.49   15.80
  -2  25  -5   90.49   15.40
  -3 -25  -5  141.39   18.50
  -3  25  -5  145.09   20.50
   3  25   5  174.88   27.50
  -3  25  -5  137.49   19.70
  -4 -25  -5    8.70   10.30
  -4  25  -5   13.70   11.60
   4  25   5   11.30   16.90
   6 -26  -5   24.10   13.10
  -6  26   5    0.50   14.40
   6  26  -5   45.20   14.40
   5 -26  -5   90.79   16.30
  -5  26   5  123.69   22.10
   5  26  -5  137.19   18.80
   4 -26  -5   75.49   15.10
  -4  26   5   53.79   16.40
   4  26  -5   77.09   15.40
   3 -26  -5  139.19   17.70
  -3 -26   5  156.08   17.40
  -3  26   5  185.78   23.90
   3  26  -5  142.89   17.50
  -2 -26   5  503.05   28.10
   2 -26  -5  498.85   29.20
  -2  26   5  420.66   30.10
   2  26  -5  450.65   27.50
   1 -26  -5  162.38   19.80
  -1 -26   5  199.48   21.40
  -1  26   5  207.38   22.70
   1  26  -5  197.08   20.10
   0 -26  -5   15.60    9.80
   0  26  -5   20.20   10.60
   0  26  -5   16.00   10.10
   0  26   5   26.40   11.50
  -1 -26  -5  293.07   25.60
  -1  26  -5  316.47   23.90
   1  26   5  376.26   36.70
  -1  26  -5  293.57   26.10
   1  26   5  335.67   24.60
  -2 -26  -5    0.00    9.20
  -2  26  -5    0.00   10.10
  -2  26  -5    4.90    9.60
   2  26   5    0.00    8.50
   2  26   5    3.20   16.30
  -3 -26  -5  298.87   27.30
  -3  26  -5  324.57   28.60
   3  26   5  279.07   33.40
  -3  26  -5  318.67   28.30
  -4 -26  -5  233.58   24.90
  -4  26  -5  182.68   23.10
   4  26   5  250.87   32.30
   5 -27  -5   53.29   14.40
  -5  27   5   68.49   19.60
   5  27  -5   81.29   15.70
   4 -27  -5  336.47   25.80
   4  27  -5  340.47   25.60
  -4  27   5  310.07   31.20
   3 -27  -5  243.98   23.90
  -3  27   5  231.68   26.50
   3  27  -5  264.07   24.30
   2 -27  -5    0.00    7.60
  -2 -27   5    1.50    8.80
   2  27  -5    1.10    8.70
  -2  27   5    6.30    9.70
   1 -27  -5   74.89   14.80
  -1 -27   5   70.39   14.40
   1  27  -5   67.29   13.70
  -1  27   5   71.29   15.70
   0 -27  -5  352.46   25.40
   0  27   5  336.77   25.40
   0  27  -5  362.66   25.00
  -1 -27  -5    0.00    8.40
  -1  27  -5    0.00    9.20
   1  27   5    0.40   10.10
  -1  27  -5    5.20    9.20
  -2 -27  -5  519.15   31.80
  -2  27  -5  561.44   33.20
  -2  27  -5  500.25   32.00
   2  27   5  526.25   31.60
  -3 -27  -5  109.79   18.30
  -3  27  -5  110.29   19.40
  -3  27  -5  131.09   19.60
   4  27   5   23.20   19.60
  -4  27  -5   13.60   12.30
   5 -28  -5  240.18   25.00
  -5  28   5  214.38   29.00
   5  28  -5  205.48   23.30
   4 -28  -5  112.69   17.60
   4  28  -5   79.79   16.00
  -4  28   5  105.39   20.80
   3 -28  -5    0.00    8.80
  -3  28   5    0.30   11.20
   3  28  -5    8.10    8.80
  -2 -28   5   45.00   13.10
   2 -28  -5   23.70   11.10
   2  28  -5   60.79   13.10
  -2  28   5   17.60   12.90
  -1 -28   5    3.50    9.60
   1 -28  -5    0.00    8.60
  -1  28   5    0.00    8.20
   1  28  -5   10.20    9.90
   0 -28  -5    6.20    9.40
   0 -28   5   36.30   12.70
   0  28   5   11.50   11.40
   0  28  -5   17.80   10.90
  -1 -28  -5  177.98   21.20
  -1  28  -5  215.98   23.20
   1  28   5  269.67   25.70
  -2 -28  -5   34.10   13.20
  -2  28  -5   60.19   15.30
   2  28   5   49.99   14.90
  -2  28  -5   52.49   14.50
  -3 -28  -5    8.90   12.10
  -3  28  -5    0.00   10.30
  -3  28  -5    0.00   11.40
   5  29  -5    0.00   10.00
   4 -29  -5    0.00   10.60
  -4  29   5    0.00   10.80
   4  29  -5   17.10   10.90
   3 -29  -5    6.60   10.30
   3  29  -5    0.00    9.30
  -3  29   5   18.50   12.80
  -2 -29   5   17.60   10.80
   2 -29  -5    0.00    9.00
  -2  29   5    3.30   11.60
   2  29  -5   11.90   10.40
  -1 -29   5    5.70   11.20
   1 -29  -5   19.30   11.10
   1  29  -5    9.40   10.20
  -1  29   5   11.60   11.80
   0 -29  -5    0.00    9.20
   0 -29   5    4.00   10.20
   0  29   5   12.40   12.30
   0  29  -5    2.50   10.20
  -1 -29  -5   19.60   11.70
  -1  29  -5   16.20   11.50
   1  29   5    2.50   10.70
  -2 -29  -5   21.90   12.70
   2  29   5   38.40   14.30
  -2  29  -5   34.20   14.10
  -3 -29  -5   46.50   14.30
  -3  29  -5   29.30   15.60
  -3  29  -5    7.70   10.90
   4 -30  -5    3.10   11.00
   4  30  -5    0.00    9.10
  -4  30   5    8.20   13.00
   3 -30  -5  190.48   22.70
  -3  30   5  190.58   25.50
   3  30  -5  185.28   21.90
  -2 -30   5  135.49   18.50
   2 -30  -5  144.89   20.20
   2  30  -5  144.89   19.30
  -2  30   5  161.98   23.30
  -1 -30   5  415.36   28.30
   1 -30  -5  342.57   30.20
  -1  30   5  287.57   29.20
   1  30  -5  332.27   25.90
   0 -30  -5    8.60   10.80
   0 -30   5   19.50   12.70
   0  30   5   14.80   12.50
   0  30  -5   36.40   12.60
   1 -30   5   96.09   18.50
  -1 -30  -5  115.69   18.40
   1  30   5   97.29   18.90
  -1  30  -5  136.19   19.70
  -2 -30  -5   28.00   13.40
  -2  30  -5   46.30   14.30
   2  30   5   59.99   16.50
   3 -31  -5   57.19   15.10
  -3  31   5   77.39   19.50
   3  31  -5   98.49   17.30
   2 -31  -5   19.20   12.10
  -2 -31   5   23.70   12.20
   2  31  -5   13.30   10.60
  -2  31   5   16.10   13.70
  -1 -31   5  100.39   17.60
   1 -31  -5   88.99   17.30
   1  31  -5   74.69   15.50
  -1  31   5   60.89   16.80
   0 -31  -5  277.87   27.30
   0 -31   5  316.07   28.90
   0  31   5  364.36   28.70
   0  31  -5  342.07   26.60
  -1 -31  -5   39.40   14.10
   1 -31   5    8.80   12.40
   1  31   5   13.60   12.90
  -1  31  -5   29.60   13.60
  -2 -32   5   94.89   17.50
   2 -32  -5   89.09   17.40
  -2  32   5   64.59   18.50
   2  32  -5   90.39   17.20
  -1 -32   5   51.69   15.40
   1 -32  -5   66.89   15.90
   1  32  -5   64.19   15.20
  -1  32   5   40.20   15.60
   0 -32  -5   16.70   12.20
   0 -32   5   29.00   14.40
   0  32  -5   35.20   13.40
   0  32   5   18.70   14.10
  -9   0   6  116.39   29.00
   9   0  -6  100.19   21.90
   8   0  -6  122.49   20.20
  -8   0   6  174.48   30.50
  -7   0   6 1082.89   63.69
   7   0  -6 1193.68   53.69
   6   0  -6 1950.70   73.09
  -6   0   6 1912.11   87.69
   5   0  -6  183.78   21.10
   5   0  -6  170.98   11.40
  -5   0   6  183.58   27.10
  -4   0   6  708.53   42.80
   4   0  -6  671.83   25.00
   4   0  -6  704.33   34.00
   3   0  -6  137.49   11.90
  -3   0   6  137.59   21.20
   3   0  -6  121.09   14.80
   2   0  -6  396.36   22.30
   2   0  -6  390.46   19.50
  -2   0   6  414.96   29.20
  -1   0   6 4922.21  172.38
   1   0  -6 5015.40  142.39
   1   0  -6 5088.99  137.59
   0   0  -6  773.92   32.00
   0   0  -6  737.73   28.30
   0   0   6  931.31   39.60
  -1   0  -6 1381.76   48.50
  -1   0  -6 1299.77   39.70
   1   0   6 1493.35   56.79
   2   0   6  292.87   21.40
  -2   0  -6  264.87   19.60
  -3   0  -6   23.80    9.60
   3   0   6   56.09   13.60
  -4   0  -6  327.17   23.30
   4   0   6  357.66   27.30
  -5   0  -6 1438.86   54.09
   5   0   6 1350.66   64.69
   6   0   6  134.29   23.70
  -6   0  -6   57.89   13.50
   7   0   6  280.87   36.00
   9  -1  -6    9.80   14.70
  -9  -1   6   23.50   22.50
  -9   1   6   14.40   21.00
   9   1  -6   14.30   15.10
  -8  -1   6  205.98   33.80
   8  -1  -6  237.28   27.20
  -8   1   6  139.39   30.00
   8   1  -6  203.08   24.90
   7  -1  -6   27.40   14.70
   7   1  -6   34.10   15.50
  -7   1   6   93.29   24.20
  -6  -1   6  790.12   49.10
   6  -1  -6  635.34   38.30
  -6   1   6  749.23   48.40
   6   1  -6  686.43   37.70
   5  -1  -6  468.55   19.10
   5  -1  -6  466.95   28.90
  -5  -1   6  482.85   37.10
  -5   1   6  501.25   38.30
   5   1  -6  439.56   29.00
   5   1  -6  479.95   18.50
  -4  -1   6   12.10   15.10
   4  -1  -6   12.00    8.20
   4  -1  -6   20.60    6.10
   4   1  -6   10.70    5.40
  -4   1   6   40.40   17.10
   4   1  -6    0.00    7.40
  -3  -1   6   43.80   15.80
   3  -1  -6   25.80    6.50
   3  -1  -6   39.90   10.10
  -3   1   6   31.50   15.60
   3   1  -6   52.29    7.80
   3   1  -6   41.60   10.20
  -2  -1   6  284.47   24.80
   2  -1  -6  277.07   16.20
   2  -1  -6  260.07   18.20
   2   1  -6  235.88   17.40
   2   1  -6  209.38   14.90
  -2   1   6  286.77   25.80
   1  -1  -6   18.40    9.10
  -1  -1   6   12.90   11.40
   1  -1  -6    4.20    6.20
   1   1  -6   14.00    6.90
   1   1  -6   12.30    6.80
   0  -1   6 3856.31  131.29
   0  -1  -6 3796.02  106.79
   0  -1  -6 3724.43  107.39
   0   1  -6 3579.44  106.89
   0   1   6 3944.41  132.29
   0   1  -6 3635.64  105.59
  -1  -1  -6  128.49   13.70
   1  -1   6  155.68   16.20
  -1  -1  -6  113.09    8.00
  -1   1  -6  113.99   13.30
   1   1   6  146.19   16.80
  -1   1  -6  122.89    7.30
  -2  -1  -6  238.08   20.30
   2  -1   6  244.08   19.70
   2   1   6  202.58   19.30
  -2   1  -6  188.58   17.90
  -3  -1  -6  119.79   15.00
   3  -1   6  127.39   17.50
  -3   1  -6  140.79   17.10
   3   1   6  141.29   19.00
   4  -1   6  178.08   22.00
  -4  -1  -6  204.98   20.20
  -4   1  -6  181.28   19.20
   4   1   6  212.28   23.50
   5  -1   6  168.28   23.10
  -5   1  -6  134.09   18.00
  -6  -1  -6  490.05   29.70
   6  -1   6  427.56   34.60
   6   1   6  440.76   36.10
  -6   1  -6  433.96   28.20
   7  -1   6   30.10   18.10
   7   1   6  102.89   24.50
  -9  -2   6   24.50   22.90
   9  -2  -6   14.20   15.00
   9   2  -6   18.50   15.10
  -9   2   6   13.40   21.50
  -8  -2   6   61.39   24.00
   8  -2  -6   15.90   13.40
  -8   2   6   31.20   22.30
   8   2  -6    6.80   11.30
   7  -2  -6   28.30   16.10
  -7  -2   6   90.79   24.60
  -7   2   6   78.29   23.10
   7   2  -6   26.20   13.70
   6  -2  -6    0.00   13.10
  -6  -2   6   51.89   20.30
   6   2  -6    0.00   10.20
  -6   2   6   63.59   21.40
  -5  -2   6   14.80   16.60
   5  -2  -6    0.00    8.80
   5  -2  -6    1.80    4.80
   5   2  -6    3.30    4.50
  -5   2   6   36.40   18.70
   5   2  -6    0.00    9.90
   4  -2  -6   57.59   12.50
  -4  -2   6   73.89   19.20
   4  -2  -6   56.59    8.20
  -4   2   6   69.79   19.60
   4   2  -6   58.19    7.50
   4   2  -6   46.10   11.20
   3  -2  -6   62.39    8.70
   3  -2  -6   53.39   11.60
  -3  -2   6   84.49   17.60
   3   2  -6   59.19   11.70
  -3   2   6   74.79   17.60
   3   2  -6   57.39    8.20
   2  -2  -6    8.40    7.60
   2  -2  -6    2.70    5.40
  -2  -2   6   18.30   12.60
  -2   2   6    4.80   13.00
   2   2  -6    3.10    7.30
   2   2  -6    3.70    5.40
   1  -2  -6    9.90    8.10
   1  -2  -6   27.90    7.80
  -1  -2   6   48.10   13.10
   1   2  -6   34.10    7.70
   1   2  -6   35.60    8.40
  -1   2   6   23.10   12.90
   0  -2  -6   42.10    8.50
   0  -2  -6   22.50    8.20
   0  -2   6   76.69   13.00
   0   2  -6   56.09    7.30
   0   2   6   54.99   12.50
   0   2  -6   61.59   10.10
   1  -2   6   42.70   10.70
  -1  -2  -6   29.80    5.50
  -1  -2  -6   29.00    8.40
   1   2   6   51.19   12.10
  -1   2  -6   25.20    7.60
  -1   2  -6   29.00    4.20
   2  -2   6   22.30    9.80
  -2  -2  -6   13.00    7.70
   2   2   6    5.60    9.50
  -2   2  -6   14.60    8.10
   3  -2   6   25.90   11.80
  -3  -2  -6   47.10   10.90
  -3   2  -6   37.80   10.30
   3   2   6   57.39   13.90
   4  -2   6   55.59   14.40
  -4  -2  -6   74.49   13.30
   4   2   6   57.19   14.70
  -4   2  -6   60.19   12.60
   5  -2   6   61.29   16.00
  -5  -2  -6    0.10    8.60
  -5   2  -6   31.90   11.30
   5   2   6   25.90   14.50
   6  -2   6  123.59   22.70
   6   2   6  100.99   21.70
  -6   2  -6   36.00   12.40
   7  -2   6   26.50   18.20
   7   2   6   17.90   17.30
  -9  -3   6   39.80   24.10
   9  -3  -6   30.30   15.60
   9   3  -6    8.40   13.90
  -9   3   6   61.39   25.80
   8  -3  -6  116.99   20.90
  -8  -3   6  115.69   27.90
  -8   3   6   75.69   27.40
   8   3  -6  107.29   19.20
  -7  -3   6   70.39   22.40
   7  -3  -6   37.60   16.20
  -7   3   6  171.28   29.10
   7   3  -6   62.89   16.50
   6  -3  -6  393.36   34.60
  -6  -3   6  465.35   38.90
  -6   3   6  512.55   40.80
   6   3  -6  426.76   30.00
  -5  -3   6  606.94   40.80
   5  -3  -6  632.24   23.80
   5  -3  -6  617.54   34.80
   5   3  -6  661.93   34.40
  -5   3   6  594.54   42.80
   4  -3  -6   22.00   10.10
  -4  -3   6   28.90   15.80
   4  -3  -6   25.10    6.50
   4   3  -6   37.00   10.70
   4   3  -6   29.40    6.20
  -4   3   6   35.20   17.90
  -3  -3   6  365.36   29.30
   3  -3  -6  300.87   21.70
   3  -3  -6  327.57   17.20
  -3   3   6  327.57   30.00
   3   3  -6  331.97   21.70
   3   3  -6  334.87   16.60
  -2  -3   6  602.54   34.30
   2  -3  -6  623.64   25.70
   2  -3  -6  620.24   28.70
   2   3  -6  600.14   27.60
  -2   3   6  629.84   37.60
   2   3  -6  621.34   25.30
  -1  -3   6   72.59   14.60
   1  -3  -6   59.99    9.60
   1  -3  -6   51.99    9.70
   1   3  -6   62.99    9.30
   1   3  -6   75.69   10.50
  -1   3   6   90.89   16.00
   0  -3  -6  807.42   32.00
   0  -3   6  824.92   36.70
   0  -3  -6  795.12   29.40
   0   3   6  752.92   38.20
   0   3  -6  765.52   27.20
   0   3  -6  774.92   31.70
  -1  -3  -6   87.39    8.20
  -1  -3  -6  115.19   13.70
   1  -3   6  105.49   13.70
   1   3   6  105.19   15.70
  -1   3  -6   96.69    6.90
  -1   3  -6  100.89   11.60
  -2  -3  -6   32.20    9.00
   2  -3   6   46.10   11.20
   2   3   6   30.30   11.70
  -2   3  -6   24.40    9.10
  -3  -3  -6   39.60   10.10
   3  -3   6   33.90   12.20
  -3   3  -6   36.50   10.40
   3   3   6   52.69   13.90
   4  -3   6  112.39   17.80
  -4  -3  -6  108.39   15.60
   4   3   6  112.59   19.90
  -4   3  -6   96.19   14.60
  -5  -3  -6  247.68   23.30
   5  -3   6  381.56   28.90
  -5   3  -6  276.27   24.60
   5   3   6  265.37   29.80
  -6  -3  -6  445.66   29.70
   6  -3   6  458.15   35.30
   6   3   6  476.85   37.00
  -6   3  -6  463.55   29.90
   7  -3   6   64.59   20.90
   7   3   6   13.70   17.40
  -9  -4   6  194.88   34.30
   9  -4  -6  233.38   29.30
   9   4  -6  230.18   27.90
  -9   4   6  174.88   34.80
  -8  -4   6   45.20   21.00
   8  -4  -6   20.70   14.20
  -8   4   6   15.20   20.80
   8   4  -6    3.30   10.00
  -7  -4   6  661.73   47.60
   7  -4  -6  696.83   40.90
   7   4  -6  708.03   39.20
  -7   4   6  685.03   49.80
  -6  -4   6 1080.99   59.59
   6  -4  -6 1190.08   52.79
   6   4  -6 1114.69   49.20
  -6   4   6 1060.79   60.89
  -5  -4   6   75.99   19.80
   5  -4  -6   72.39    8.90
   5  -4  -6   51.19   13.90
  -5   4   6   80.29   21.10
   5   4  -6   74.89   15.10
  -4  -4   6  252.67   28.10
   4  -4  -6  259.47   23.20
   4  -4  -6  245.78   14.40
   4   4  -6  248.38   13.20
  -4   4   6  237.98   30.00
   4   4  -6  239.98   21.90
  -3  -4   6   63.09   16.50
   3  -4  -6   63.99   12.50
   3  -4  -6   41.10    7.60
   3   4  -6   51.29   10.50
   3   4  -6   34.90    6.90
  -3   4   6   73.39   18.40
  -2  -4   6  960.90   46.00
   2  -4  -6 1022.10   39.20
   2  -4  -6  988.00   35.60
   2   4  -6  979.30   34.40
  -2   4   6 1054.39   49.90
   2   4  -6  985.60   38.10
   1  -4  -6 1967.00   63.09
  -1  -4   6 2070.89   77.19
   1  -4  -6 2081.29   64.99
  -1   4   6 2017.80   80.09
   1   4  -6 2034.50   63.29
   1   4  -6 2099.79   62.99
   0  -4   6  586.84   30.10
   0  -4  -6  610.44   26.90
   0  -4  -6  587.14   24.00
   0   4  -6  561.14   22.10
   0   4  -6  593.14   26.80
   0   4   6  608.94   32.80
  -1  -4  -6  864.01   28.90
   1  -4   6  851.11   38.10
  -1  -4  -6  838.12   34.40
  -1   4  -6  854.11   34.90
  -1   4  -6  866.81   26.90
   1   4   6  871.71   41.20
  -2  -4  -6  652.03   30.10
   2  -4   6  630.04   32.40
   2   4   6  666.03   34.80
  -2   4  -6  656.13   30.70
  -2   4  -6  644.44   20.20
   3  -4   6   15.60    9.60
  -3  -4  -6    3.20    7.00
  -3   4  -6    0.00    6.50
   3   4   6    0.00    9.40
  -4  -4  -6  330.77   22.50
   4  -4   6  251.57   23.80
   4   4   6  294.67   26.80
  -4   4  -6  314.97   22.20
  -5  -4  -6  869.51   38.20
   5  -4   6  801.12   44.90
  -5   4  -6  838.12   38.80
   5   4   6  748.13   45.30
   6  -4   6   94.49   18.20
  -6  -4  -6   29.10   12.40
   6   4   6  113.39   22.60
   7  -4   6  266.47   33.10
   7   4   6  213.08   31.20
   9  -5  -6    0.00   10.70
  -9  -5   6   74.29   25.00
   9   5  -6   20.20   15.10
  -9   5   6   13.40   20.70
  -8  -5   6  155.98   30.20
   8  -5  -6  186.58   25.50
   8   5  -6  111.49   19.00
  -8   5   6  128.19   30.60
   7  -5  -6   10.80   12.80
   7   5  -6    0.00   11.20
  -7   5   6   16.60   19.00
   6  -5  -6  443.86   31.00
  -6  -5   6  505.65   39.50
  -6   5   6  418.66   39.20
   6   5  -6  437.56   29.60
  -5  -5   6  464.85   36.50
   5  -5  -6  541.85   21.70
   5  -5  -6  471.65   29.80
   5   5  -6  489.65   29.40
  -5   5   6  469.45   38.40
   4  -5  -6  147.39   12.80
   4  -5  -6  152.78   18.50
  -4  -5   6  145.49   22.40
   4   5  -6  137.59   10.40
   4   5  -6  149.49   17.20
  -4   5   6  142.09   25.10
  -3  -5   6  256.67   25.10
   3  -5  -6  263.27   15.60
   3  -5  -6  263.87   20.00
   3   5  -6  235.48   18.70
  -3   5   6  244.48   27.80
   3   5  -6  251.67   14.40
   2  -5  -6  166.18   16.40
  -2  -5   6  192.58   20.60
   2  -5  -6  172.68   14.60
   2   5  -6  173.88   13.20
  -2   5   6  188.28   23.50
   2   5  -6  194.58   15.30
   1  -5  -6    8.90    6.60
   1  -5  -6    0.00    5.60
  -1  -5   6    0.90   10.20
   1   5  -6   19.80    7.10
  -1   5   6    0.00   10.90
   1   5  -6    4.50    5.40
   0  -5   6 1313.67   52.19
   0  -5  -6 1301.07   42.90
   0  -5  -6 1299.07   45.40
   0   5   6 1308.87   55.59
   0   5  -6 1274.87   45.50
   0   5  -6 1299.37   41.00
  -1  -5  -6  796.52   33.30
   1  -5   6  799.42   36.30
  -1  -5  -6  765.92   27.50
  -1   5  -6  765.32   33.30
   1   5   6  832.92   40.10
  -1   5  -6  866.71   26.20
   2  -5   6   94.19   14.20
  -2  -5  -6  110.49   13.90
  -2   5  -6  105.29    6.90
   2   5   6  111.29   16.20
  -2   5  -6   93.09   13.00
  -3  -5  -6  781.42   34.20
   3  -5   6  703.73   36.60
  -3   5  -6  802.62   35.10
   3   5   6  695.03   39.10
   4  -5   6   71.49   15.90
  -4  -5  -6   90.59   14.20
   4   5   6   87.59   18.40
  -4   5  -6   77.39   13.90
  -5  -5  -6   26.90   10.60
   5  -5   6   19.30   12.40
  -5   5  -6   10.60   10.00
  -6  -5  -6  400.06   27.40
   6  -5   6  364.16   32.00
   6   5   6  326.47   35.30
  -6   5  -6  360.56   27.00
   7  -5   6   19.30   17.40
   7   5   6   73.29   22.20
  -7   5  -6    7.30   12.30
  -9  -6   6   52.19   24.40
   9  -6  -6   85.69   19.50
  -9   6   6   50.29   24.90
   9   6  -6   45.50   17.30
  -8  -6   6   79.39   24.00
   8  -6  -6  100.39   20.30
   8   6  -6   79.39   17.60
  -8   6   6   88.89   28.20
  -7  -6   6   15.30   18.00
   7  -6  -6    3.10   11.20
  -7   6   6   17.60   20.50
   7   6  -6    5.80   10.30
   6  -6  -6   16.50   12.90
  -6  -6   6    9.60   17.60
  -6   6   6   28.50   20.00
   6   6  -6   25.00   12.20
   5  -6  -6  243.28   14.70
  -5  -6   6  198.18   27.40
   5  -6  -6  221.98   23.80
  -5   6   6  263.37   32.90
   5   6  -6  184.78   20.70
   4  -6  -6  150.88   13.10
   4  -6  -6  141.09   17.60
  -4  -6   6  170.08   23.70
   4   6  -6  160.68   18.10
   4   6  -6  158.88   10.60
  -4   6   6  168.18   26.40
   3  -6  -6   23.40    9.40
   3  -6  -6   39.00    7.80
  -3  -6   6   25.90   14.40
  -3   6   6   44.70   17.70
   3   6  -6   25.90    8.50
   3   6  -6   25.10    6.50
  -2  -6   6  155.48   19.00
   2  -6  -6  139.69   13.40
   2  -6  -6  123.39   13.70
  -2   6   6  151.28   22.30
   2   6  -6  165.18   13.40
   2   6  -6  138.99   13.90
   1  -6  -6   35.40    7.70
  -1  -6   6   44.50   12.00
   1  -6  -6   37.40    8.50
  -1   6   6   41.80   13.90
   1   6  -6   37.70    7.40
   1   6  -6   18.70    7.00
   0  -6   6   19.20    9.60
   0  -6  -6   14.30    7.10
   0   6  -6   18.20    5.00
   0   6  -6   22.40    7.60
   0   6   6   11.60   10.80
   1  -6   6    9.30    8.20
  -1  -6  -6    0.70    5.80
   1   6   6    5.30   10.10
  -1   6  -6    8.70    4.00
   1   6   6    1.70    4.90
  -1   6  -6   13.50    7.40
   2  -6   6   87.99   13.40
  -2  -6  -6   92.59   12.70
  -2   6  -6   68.79    6.20
   2   6   6   63.69   14.10
   2   6   6   73.39    7.00
  -2   6  -6   59.39   11.40
   3  -6   6   20.20   10.60
  -3  -6  -6   19.90    8.60
  -3   6  -6   18.00    8.60
   3   6   6   27.30   12.10
   4  -6   6  286.97   24.30
  -4  -6  -6  281.87   21.30
  -4   6  -6  291.07   22.40
   4   6   6  272.27   26.00
   5  -6   6    0.00   10.40
  -5  -6  -6    0.70    9.40
   5   6   6    8.10   13.20
  -5   6  -6    9.00    9.30
  -6  -6  -6  106.99   16.90
   6  -6   6  147.09   23.40
  -6   6  -6   94.99   16.50
   6   6   6  172.88   26.40
   7  -6   6   15.40   16.60
   7   6   6   10.70   16.90
  -7   6  -6    0.00    9.70
   9  -7  -6   15.70   15.50
  -9  -7   6   19.10   21.80
  -9   7   6   33.10   27.20
   9   7  -6    0.00   12.50
   8  -7  -6  119.89   21.80
  -8  -7   6  110.69   26.90
   8   7  -6  115.99   19.40
  -8   7   6   93.39   28.90
  -7  -7   6  258.47   33.30
   7  -7  -6  203.48   25.40
   7   7  -6  195.28   23.40
  -7   7   6  219.88   34.70
   6  -7  -6   63.99    9.50
   6  -7  -6   73.39   15.90
  -6  -7   6   75.59   21.50
   6   7  -6   52.29   13.80
  -6   7   6   61.99   21.60
   5  -7  -6  189.28   13.80
   5  -7  -6  196.08   22.50
  -5  -7   6  247.28   29.20
   5   7  -6  206.58   21.30
  -5   7   6  241.28   32.80
   4  -7  -6   61.79   13.70
  -4  -7   6   94.39   19.50
   4  -7  -6   77.49   10.10
   4   7  -6   72.39    7.90
  -4   7   6   87.49   22.70
   4   7  -6   76.69   13.20
  -3  -7   6   81.19   16.70
   3  -7  -6   70.79   12.30
   3  -7  -6   88.79   10.90
   3   7  -6   86.89    9.50
  -3   7   6   65.89   19.90
   3   7  -6   82.29   12.40
   2  -7  -6  188.78   14.30
   2  -7  -6  187.58   17.20
  -2  -7   6  157.08   18.70
   2   7  -6  175.98   14.20
  -2   7   6  179.98   23.60
   2   7  -6  196.18   13.50
   1  -7  -6   69.09   10.40
  -1  -7   6   95.69   14.00
   1   7  -6   83.69    9.90
   1   7  -6   72.69   10.10
  -1   7   6   51.49   15.50
   0  -7   6  599.54   29.50
   0  -7  -6  559.94   26.20
   0   7  -6  617.64   22.90
   0   7  -6  611.34   27.30
   0   7   6  612.14   33.80
   0   7   6  587.14   25.00
   1  -7   6   72.99   11.70
  -1  -7  -6   48.50    9.90
   1   7   6   75.19    8.60
  -1   7  -6   57.79   10.20
   1   7   6   55.49   13.70
  -1   7  -6   64.49    6.90
  -2  -7  -6   45.70   10.30
   2  -7   6   61.99   12.00
   2   7   6   48.90    6.50
  -2   7  -6   49.00   10.80
  -2   7  -6   41.20    5.70
   2   7   6   73.79   15.00
   3  -7   6   97.89   15.00
  -3  -7  -6   77.29   11.90
  -3   7  -6   77.09   13.20
   3   7   6  103.69   17.30
   4  -7   6  335.67   25.00
  -4  -7  -6  312.07   22.30
  -4   7  -6  296.17   25.00
   4   7   6  300.37   27.00
   5  -7   6   28.00   13.40
  -5  -7  -6   20.90   10.90
   5   7   6    9.10   14.30
  -5   7  -6   46.40   12.00
   6  -7   6  298.07   32.60
  -6  -7  -6  322.97   26.40
   6   7   6  247.48   31.80
  -6   7  -6  234.88   23.70
   7  -7   6   37.20   17.10
  -7   7  -6   19.20   12.20
   7   7   6   11.90   17.70
   9  -8  -6  181.48   28.00
   9   8  -6  167.68   24.50
  -9   8   6  135.29   32.90
   8  -8  -6    9.20   13.10
  -8  -8   6   31.10   20.90
   8   8  -6    0.00   11.30
  -8   8   6   22.30   22.30
  -7  -8   6  292.97   35.60
   7  -8  -6  273.27   29.10
   7   8  -6  343.97   30.30
  -7   8   6  325.77   40.10
   6  -8  -6  304.37   17.70
   6  -8  -6  361.56   31.90
  -6  -8   6  359.96   37.70
   6   8  -6  321.47   25.50
  -6   8   6  296.37   37.10
   5  -8  -6  106.79   17.30
  -5  -8   6   98.59   21.40
   5  -8  -6   84.89   10.90
   5   8  -6  116.49   16.90
  -5   8   6  110.09   24.80
  -4  -8   6 1014.00   51.69
   4  -8  -6 1020.30   37.10
   4  -8  -6 1060.69   45.90
   4   8  -6 1056.29   33.60
   4   8  -6 1098.99   44.30
  -4   8   6 1175.58   59.49
   3  -8  -6   24.00    7.20
  -3  -8   6   25.80   13.20
   3  -8  -6   16.30    9.00
   3   8  -6   18.00    8.40
  -3   8   6   38.50   16.50
   3   8  -6   17.00    6.10
   2  -8  -6  185.28   16.00
  -2  -8   6  187.68   19.70
   2  -8  -6  192.68   17.50
   2   8  -6  153.08   14.80
  -2   8   6  148.69   22.50
   2   8  -6  186.08   13.70
   1  -8  -6 1009.90   37.50
  -1  -8   6  966.50   42.80
   1   8  -6  998.10   36.70
  -1   8   6 1042.00   38.30
   1   8  -6  987.90   35.60
  -1   8   6  986.20   48.90
   0  -8  -6  229.08   16.70
   0  -8   6  252.17   19.10
   0   8  -6  224.68   16.90
   0   8   6  218.08   14.90
   0   8  -6  233.88   13.30
   0   8   6  226.68   23.30
  -1  -8  -6  338.17   20.90
   1  -8   6  376.66   21.80
   1   8   6  366.26   26.70
   1   8   6  339.77   17.20
  -1   8  -6  363.66   15.70
  -1   8  -6  343.57   21.40
  -2  -8  -6  358.86   21.90
   2  -8   6  385.36   23.00
   2   8   6  407.96   27.70
   2   8   6  354.86   16.00
  -2   8  -6  389.26   16.00
  -2   8  -6  332.77   22.50
  -3  -8  -6   50.69    9.70
   3  -8   6   57.69   12.50
  -3   8  -6   34.80   10.80
   3   8   6   42.30   13.80
  -4  -8  -6  751.02   34.60
   4  -8   6  677.33   38.10
   4   8   6  799.02   43.60
  -4   8  -6  757.02   36.30
   5  -8   6  376.96   29.30
  -5  -8  -6  372.26   25.30
   5   8   6  360.26   31.10
  -5   8  -6  370.26   26.00
   6  -8   6   11.80   14.60
  -6   8  -6    7.80   10.40
   6   8   6   55.89   17.90
   7  -8   6  159.58   27.80
  -7   8  -6  167.08   22.20
   7   8   6  167.18   29.80
   9  -9  -6   84.19   20.90
   9   9  -6   54.09   16.80
  -9   9   6   43.20   26.60
   8  -9  -6   33.80   16.50
  -8  -9   6   56.99   21.70
   8   9  -6   42.40   14.90
  -8   9   6   59.39   25.70
   7  -9  -6   36.60   14.60
  -7  -9   6   50.69   21.40
   7   9  -6    0.00    9.70
  -7   9   6    0.00   19.40
  -6  -9   6   63.09   19.70
   6  -9  -6   59.49   16.00
   6  -9  -6   47.40    9.10
   6   9  -6   95.39   16.40
  -6   9   6   39.50   22.00
  -5  -9   6 1635.84   75.59
   5  -9  -6 1666.13   53.79
   5  -9  -6 1742.23   66.89
   5   9  -6 1760.62   64.09
  -5   9   6 1758.82   81.49
   4  -9  -6  639.44   26.40
  -4  -9   6  606.14   37.90
   4  -9  -6  601.84   33.40
   4   9  -6  613.44   22.90
  -4   9   6  687.83   45.30
   4   9  -6  581.44   30.60
   3  -9  -6  783.62   35.70
  -3  -9   6  720.33   38.80
   3  -9  -6  736.63   29.80
   3   9  -6  709.03   32.40
  -3   9   6  699.23   44.80
   3   9  -6  760.72   27.50
   2  -9  -6  299.97   18.10
  -2  -9   6  305.37   24.00
   2   9  -6  314.87   17.40
  -2   9   6  292.67   21.00
   2   9  -6  300.97   18.10
  -2   9   6  352.46   30.90
   1  -9  -6  110.99   12.90
  -1  -9   6  131.89   15.50
  -1   9   6  136.69   20.10
   1   9  -6  120.19   11.70
  -1   9   6  119.39   13.20
   1   9  -6  123.09   13.60
   0  -9  -6  275.47   18.70
   0  -9   6  289.27   20.40
   0   9   6  350.16   26.20
   0   9   6  314.17   17.70
   0   9  -6  281.57   19.10
   0   9  -6  298.57   15.60
   1  -9   6 1114.09   45.00
  -1  -9  -6 1160.98   42.40
   1   9   6 1062.99   50.59
   1   9   6 1080.49   37.10
  -1   9  -6 1155.38   36.30
  -1   9  -6 1067.29   42.20
  -2  -9  -6    9.30    7.10
   2  -9   6   15.60    8.60
  -2   9  -6   22.60    5.50
   2   9   6    8.50   11.70
  -2   9  -6   22.10    9.10
   2   9   6   19.40    5.60
   3  -9   6  739.73   36.50
  -3  -9  -6  787.62   34.10
  -3   9  -6  746.63   35.30
   3   9   6  733.83   40.90
  -4  -9  -6  123.49   15.50
   4  -9   6  133.19   18.40
  -4   9  -6  108.89   16.00
   5  -9   6  157.18   22.20
  -5  -9  -6  170.28   18.70
   5   9   6  172.78   25.30
  -5   9  -6  140.79   18.30
   6  -9   6   56.59   17.40
   6   9   6   62.79   20.40
  -6   9  -6   75.89   15.80
   7  -9   6   29.70   17.00
  -7   9  -6    5.80   11.60
   7   9   6   78.79   23.10
   9 -10  -6   70.69   19.60
   9  10  -6   48.10   24.70
  -9  10   6   60.59   30.60
   9  10  -6   32.70   15.30
  -8 -10   6   35.30   21.00
   8 -10  -6   62.29   18.60
  -8  10   6   10.60   22.20
   8  10  -6   40.20   14.90
  -7 -10   6   23.30   18.20
   7 -10  -6   11.40   12.70
  -7  10   6    0.00   20.60
   7  10  -6    2.10   10.10
   6 -10  -6   15.20    7.40
   6 -10  -6   15.20   12.10
  -6 -10   6    4.80   16.50
   6  10  -6   13.10    9.90
  -6  10   6   14.00   19.50
  -5 -10   6  209.88   27.60
   5 -10  -6  184.38   15.60
   5 -10  -6  170.28   21.50
   5  10  -6  185.38   20.20
  -5  10   6  206.98   33.20
   4 -10  -6   23.90   10.40
  -4 -10   6    7.40   13.90
   4 -10  -6   14.00    6.60
  -4  10   6   23.40   19.10
   4  10  -6    8.80    5.20
   4  10  -6    4.20    7.50
   3 -10  -6   25.40    7.20
  -3 -10   6   11.20   12.10
   3  10  -6   22.40    6.60
  -3  10   6    9.20   16.70
   3  10  -6   21.40    9.20
  -2 -10   6  223.88   20.70
   2 -10  -6  213.18   15.70
  -2  10   6  218.58   19.40
   2  10  -6  229.48   16.40
   2  10  -6  184.08   14.20
  -2  10   6  230.98   27.70
   1 -10  -6   53.39    9.80
  -1 -10   6   43.20   11.40
  -1  10   6   51.59    9.90
   1  10  -6   43.90    8.70
  -1  10   6   56.39   16.40
   1  10  -6   40.90    8.20
   0 -10  -6   69.49   10.80
   0 -10   6   76.69   12.40
   0  10   6   79.29   10.70
   0  10  -6   87.29    9.50
   0  10   6   81.49   16.70
   0  10  -6   83.69   11.70
   1 -10   6   21.80    9.00
  -1 -10  -6   12.20    7.30
   1  10   6   11.60    5.70
   1  10   6    3.30   11.00
  -1  10  -6    2.30    6.50
  -1  10  -6   12.90    5.10
   2 -10   6   39.40   10.20
  -2 -10  -6   37.80    9.70
  -2  10  -6   32.10    6.40
  -2  10  -6   29.60   10.30
   2  10   6   43.40   14.90
   2  10   6   40.90    7.20
  -3 -10  -6  202.88   19.00
   3 -10   6  209.88   18.90
   3  10   6  215.28   23.90
  -3  10  -6  204.18   20.60
  -4 -10  -6  415.66   24.80
   4 -10   6  367.66   26.10
  -4  10  -6  383.56   25.70
   4  10   6  352.36   30.10
   5 -10   6    1.00   11.80
  -5 -10  -6   17.40   10.20
  -5  10  -6    5.40    9.70
   5  10   6   55.69   17.60
   6 -10   6  125.79   22.00
   6  10   6   67.39   20.10
  -6  10  -6   60.99   14.00
   7 -10   6   22.10   18.00
  -7  10  -6    3.20   12.20
   7  10   6   59.29   21.30
   9 -11  -6   32.90   16.80
   9  11  -6   18.60   21.80
   9  11  -6   41.80   16.10
  -9  11   6   72.79   32.00
   8 -11  -6  106.39   21.30
  -8  11   6   97.39   31.10
   8  11  -6  118.59   19.50
   7 -11  -6   18.50   13.10
  -7 -11   6   20.70   18.80
   7  11  -6   18.00   11.10
  -7  11   6   29.10   21.00
   6 -11  -6  171.68   15.60
  -6 -11   6  193.98   27.70
   6 -11  -6  172.18   22.50
  -6  11   6  151.08   30.40
   6  11  -6  199.48   22.20
   5 -11  -6   80.39   16.70
  -5 -11   6  101.49   21.60
   5 -11  -6  101.79   12.40
   5  11  -6   50.89   13.10
  -5  11   6   75.79   25.50
   4 -11  -6   40.70    8.90
   4 -11  -6   32.30   12.50
  -4 -11   6   41.60   16.50
   4  11  -6   55.29   12.20
  -4  11   6   38.50   21.50
   4  11  -6   56.59    8.00
  -3 -11   6  244.88   23.70
   3 -11  -6  267.77   17.30
  -3  11   6  308.47   33.40
   3  11  -6  250.97   18.30
  -3  11   6  240.68   22.40
   3  11  -6  255.47   15.20
   2 -11  -6  753.52   32.10
  -2 -11   6  775.52   37.50
  -2  11   6  838.72   47.60
   2  11  -6  791.62   32.70
  -2  11   6  811.22   34.70
   2  11  -6  815.32   31.10
   1 -11  -6    0.00    5.60
  -1 -11   6    5.10   10.10
  -1  11   6    1.70   13.50
   1  11  -6    0.00    4.90
  -1  11   6    0.00    6.40
   1  11  -6    3.10    6.20
   0 -11   6   46.40   10.80
   0 -11  -6   46.20    9.10
   0  11  -6   44.10    7.70
   0  11   6   42.90   15.20
   0  11  -6   36.70    9.20
   0  11   6   66.79    9.90
  -1 -11  -6    0.50    6.20
   1 -11   6    0.00    7.80
   1  11   6    7.90    5.80
  -1  11  -6    3.70    7.10
   1  11   6    1.20   11.70
  -1  11  -6    5.00    4.90
   2 -11   6  501.85   25.90
  -2 -11  -6  532.45   27.30
  -2  11  -6  525.25   21.60
  -2  11  -6  475.95   27.10
   2  11   6  499.45   32.60
   2  11   6  501.75   21.60
  -3 -11  -6  118.39   15.40
   3 -11   6  113.79   14.90
   3  11   6   82.49   17.10
  -3  11  -6   76.49   13.70
  -4 -11  -6   57.59   12.50
   4 -11   6   97.19   16.30
  -4  11  -6   80.29   14.80
   4  11   6   94.39   18.50
   5 -11   6   77.09   16.50
  -5 -11  -6   55.09   13.00
   5  11   6   70.29   19.30
  -5  11  -6   89.59   16.50
   6 -11   6  173.88   25.50
  -6  11  -6  155.78   21.30
   6  11   6  209.08   30.50
  -7  11  -6    9.10   12.70
   7  11   6    0.00   17.00
   9 -12  -6  300.47   34.20
  -9  12   6  229.98   42.50
   9  12  -6  222.78   27.20
   9  12  -6  278.57   39.40
   8 -12  -6    8.10   13.50
   8  12  -6   18.40   12.40
  -8  12   6    6.20   23.50
  -7 -12   6  275.87   34.10
   7 -12  -6  225.38   28.30
  -7  12   6  243.68   36.50
   7  12  -6  276.47   27.40
  -6 -12   6  467.35   37.40
   6 -12  -6  434.46   32.20
   6 -12  -6  447.46   23.30
   6  12  -6  434.96   28.80
  -6  12   6  453.65   42.80
  -5 -12   6   30.30   16.60
   5 -12  -6    4.10    6.70
   5 -12  -6   16.30   11.80
  -5  12   6   34.20   20.90
   5  12  -6    8.10    8.90
  -4 -12   6 1159.48   54.89
   4 -12  -6 1158.88   41.60
  -4  12   6 1094.59   61.39
[truncated: 274,227 more chars]
